# Supplementary material
Source: PubMed Central journal article supplement (PMC3395464)
Supplement: NIHMS377273-supplement-Supp_Fig_S1-S3___Table_S1-S3.pdf [file NIHMS377273-supplement-Supp_Fig_S1-S3___Table_S1-S3.pdf]

## SUPPLEMENTARY MATERIAL

### Figure Legends

**Fig. S1.** Growth phenotypes of the *F. tularensis* *ssrA* and *smpB* mutants in chemically defined Chamberlain medium (CDM). The *smpB* and *ssrA* mutants, the complemented mutants, and the WT were inoculated in CDM from overnight cultures. To monitor their growth, OD<sub>600</sub> measurements were taken at the indicated time points and plotted.

**Fig. S2.** *F. tularensis* *smpB* mutant strain is sensitive to heat. The *smpB* and *ssrA* mutants, the complemented mutants, and the WT were grown to saturation in liquid culture, brought to the same optical density, serially diluted, and equal aliquots spotted on chocolate agar plates. Plates were incubated at 37°C or 40°C, as indicated.

**Fig. S3.** *F. tularensis* *smpB* mutant is defective in Intracellular replication. The *smpB* mutant and WT were transformed with a plasmid encoding green fluorescent protein under the control of constitutively active *F. tularensis* *groEL* promoter. The transformed cells were used to infect a nearly confluent culture of mouse bone marrow derived macrophages at the equivalent multiplicity of infection. Fluorescence was detected 16 h later using epifluorescent and phase-contrast microscopy, and photographed using a digital camera. Merged phase-contrast and fluorescence images obtained at the same magnification (at 200X) are shown.

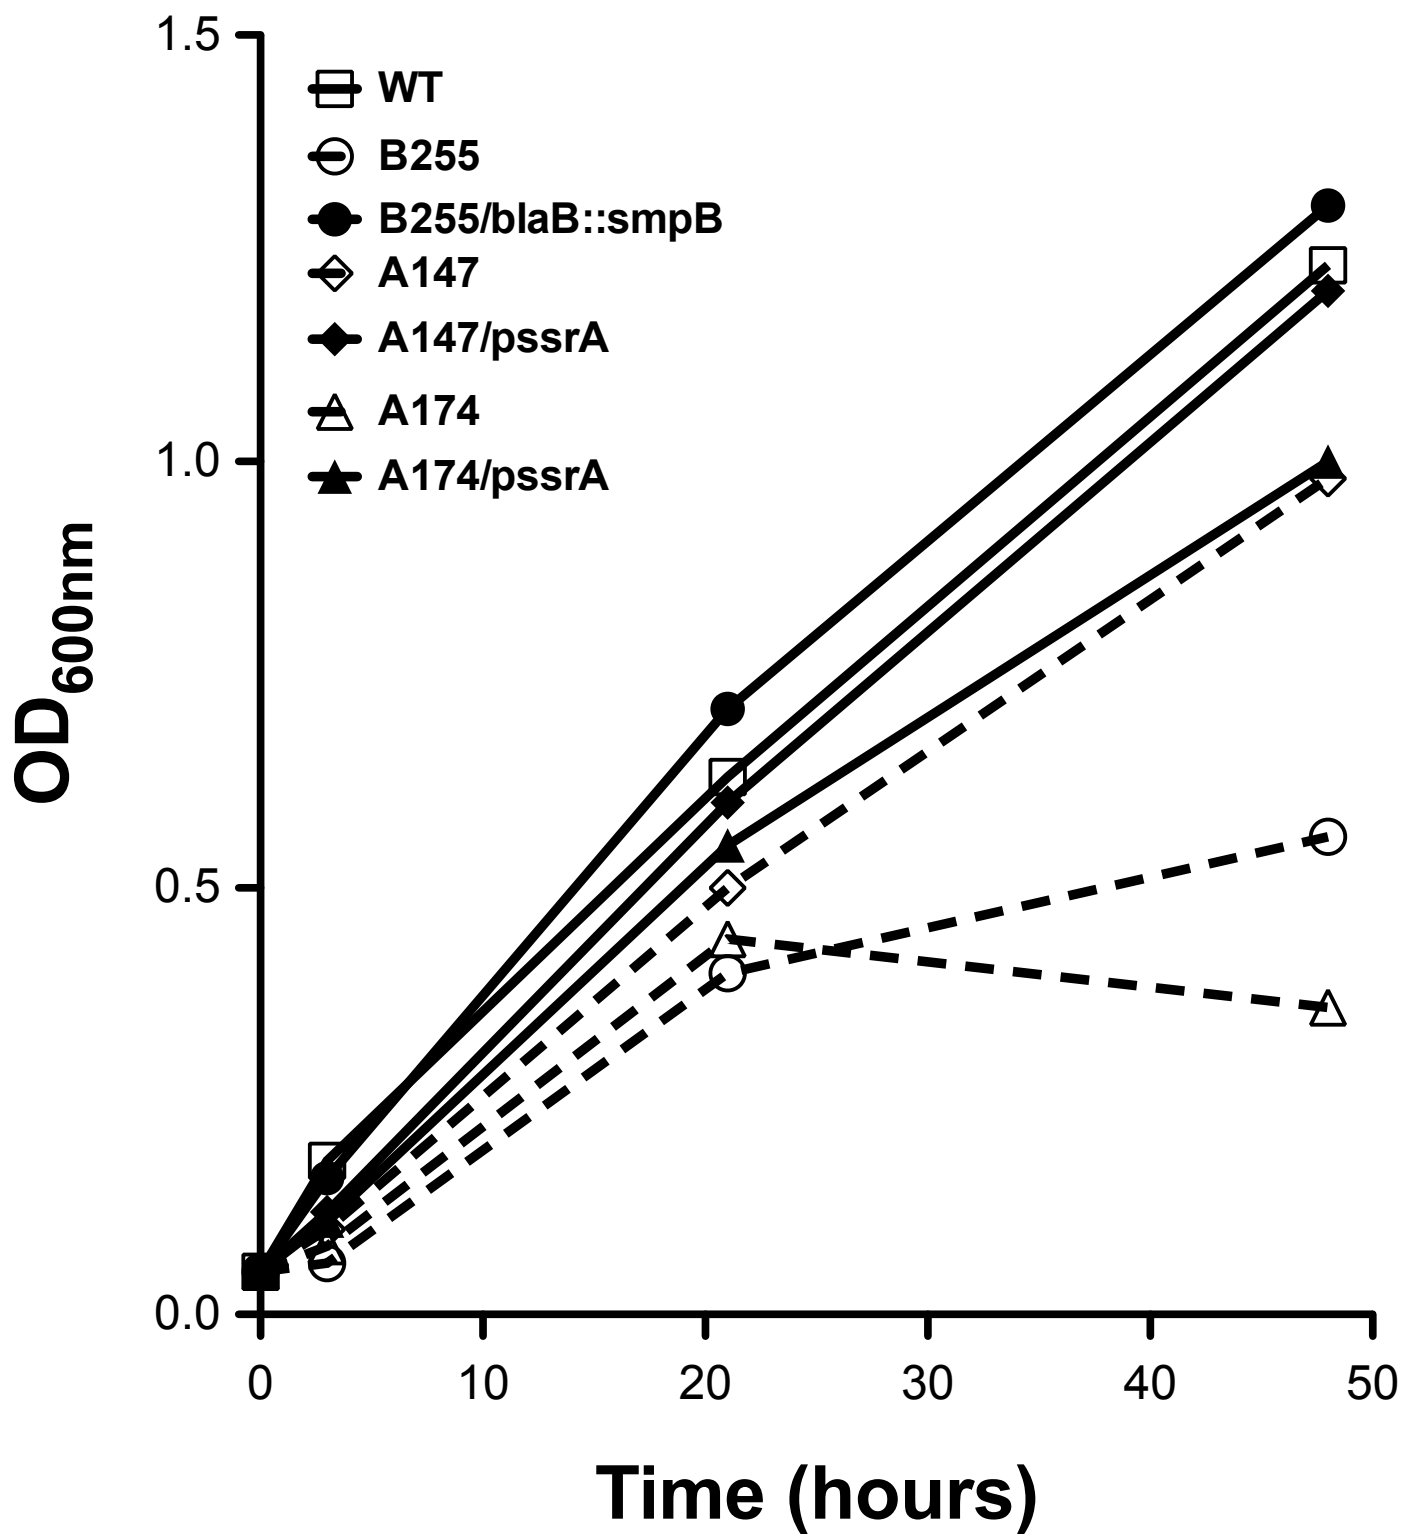

Fig. S1

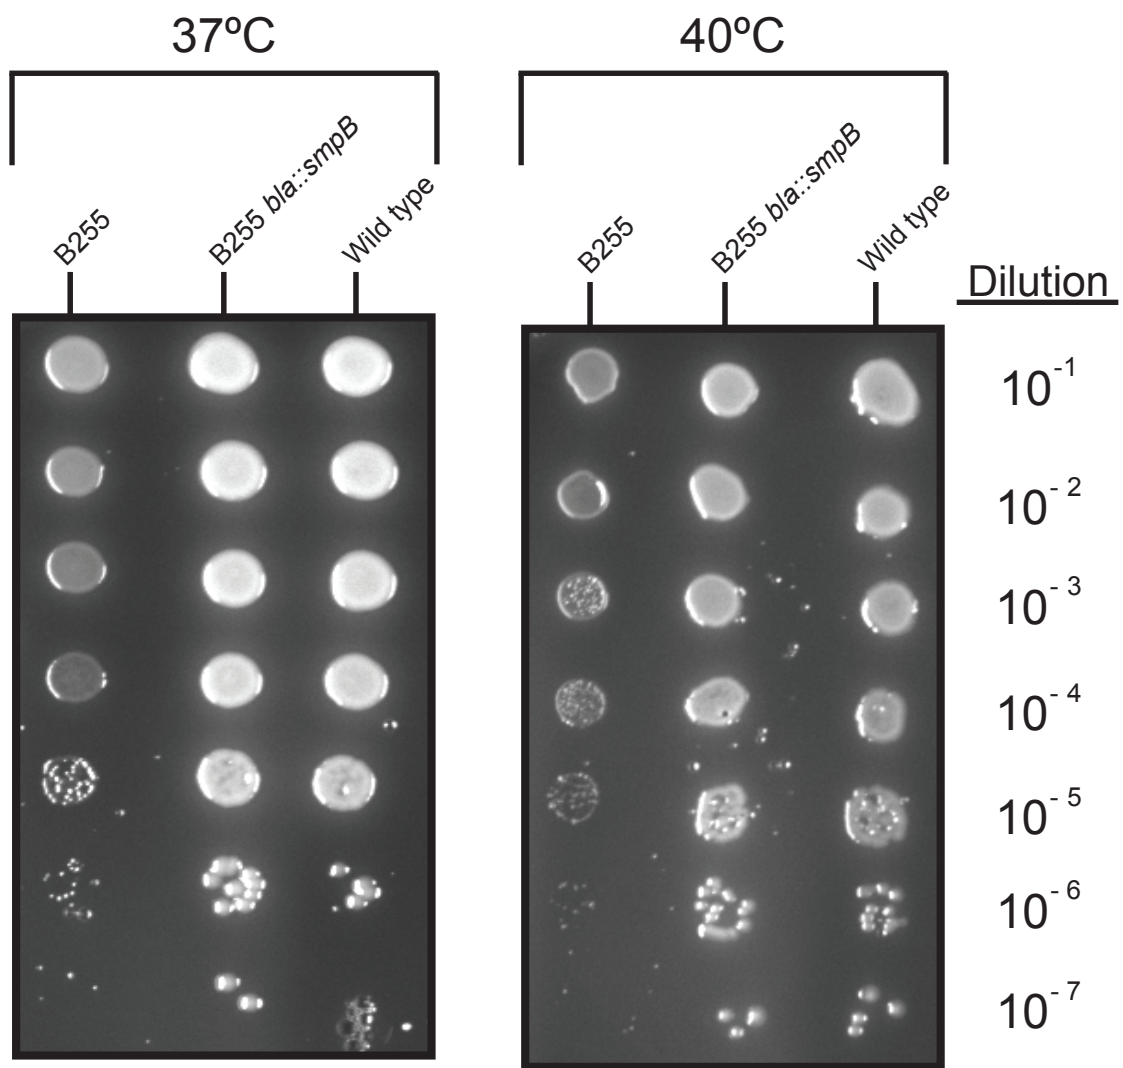

Fig. S2

Wild-type

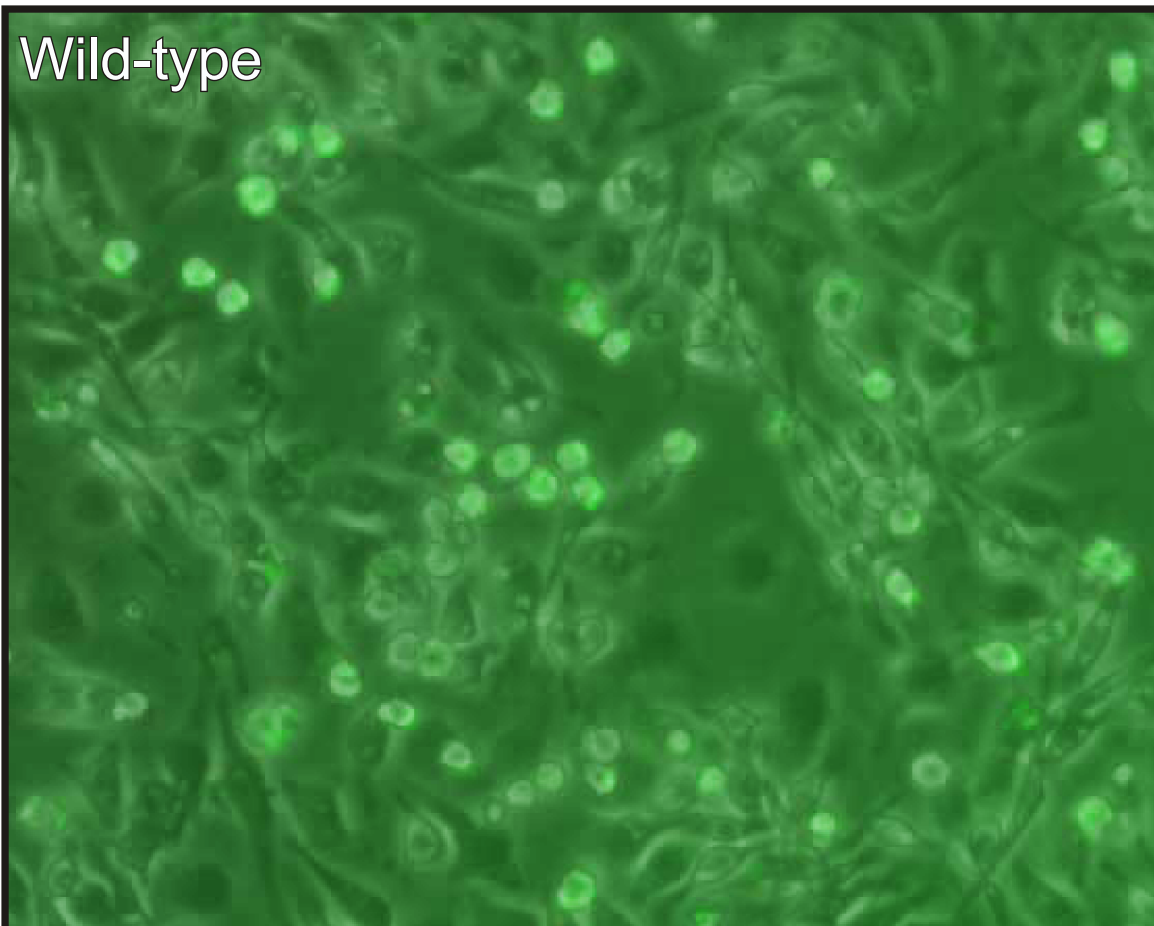

*smpB*

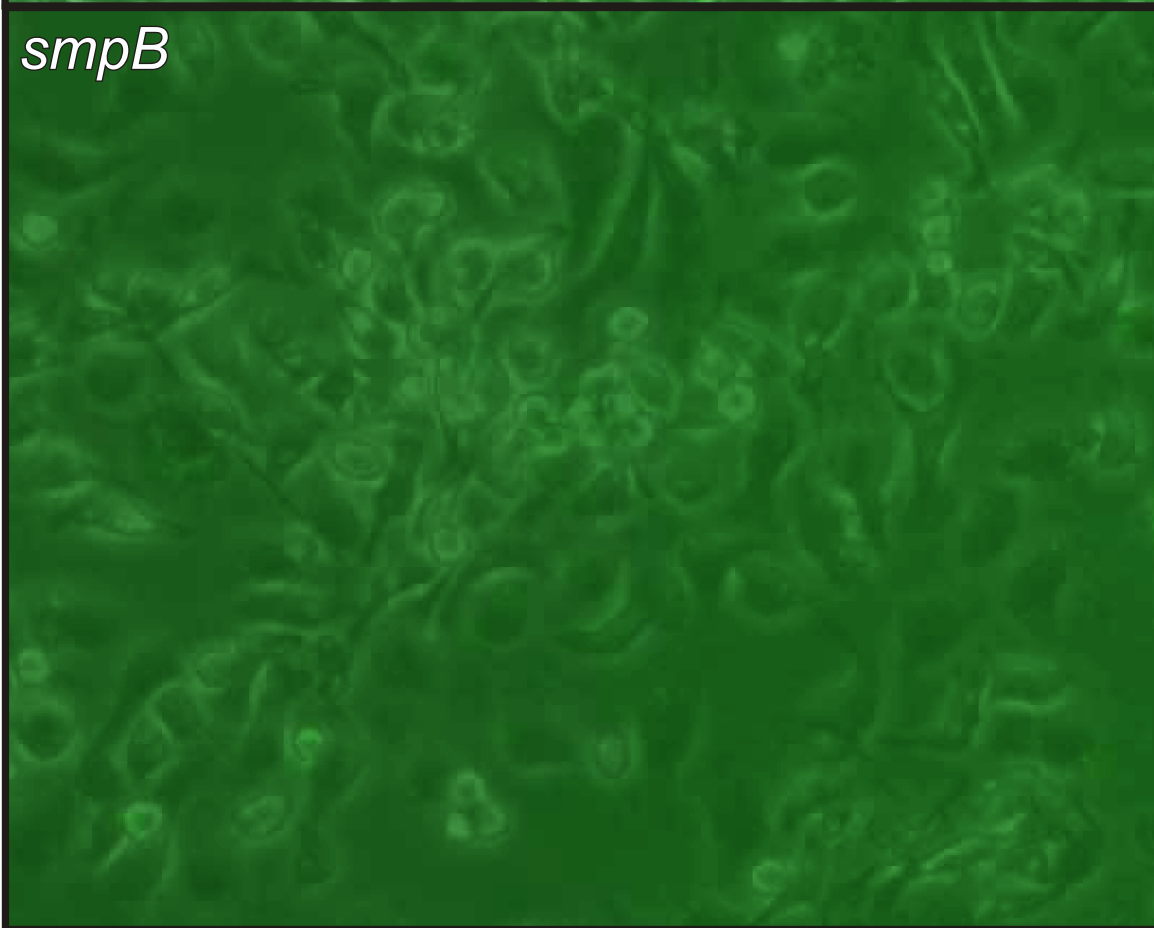

Fig. S3

**Table S1.** Proteins tagged by the *F. tularensis* tmRNA system. All tagged substrates were assigned to functional categories according to *F. tularensis* genome database.

| <b>UniProt ID</b>                            | <b>Protein Description</b>                                                              |
|----------------------------------------------|-----------------------------------------------------------------------------------------|
| <b>Amino acid transport and metabolism</b>   |                                                                                         |
| Q2A193 Q2A193_FRATH                          | Glutamine synthetase FTL_1899                                                           |
| Q2A2Q0 Q2A2Q0_FRATH                          | Prephenate dehydratase FTL_1336                                                         |
| Q2A3Q1 Q2A3Q1_FRATH                          | Histidine decarboxylase FTL_0938                                                        |
| Q2A419 AROK_FRATH                            | Shikimate kinase aroK                                                                   |
| Q2A441 Q2A441_FRATH                          | Gamma-glutamyltranspeptidase FTL_0766                                                   |
| Q2A490 Q2A490_FRATH                          | Proton-dependent oligopeptide transport (POT) family protein FTL_0711                   |
| Q2A4T3 Q2A4T3_FRATH                          | Spermidine synthase FTL_0500                                                            |
| Q2A4U9 Q2A4U9_FRATH                          | Shikimate 5-dehydrogenase FTL_0481                                                      |
| Q2A4V1 GCSA_FRATH                            | Probable glycine dehydrogenase [decarboxylating] subunit 1 gcvPA                        |
| Q2A4V2 Q2A4V2_FRATH                          | Glycine cleavage system H protein FTL_0478                                              |
| Q2A510 Q2A510_FRATH                          | Oligopeptidase A FTL_0419                                                               |
| Q2A544 Q2A544_FRATH                          | Amino acid permease FTL_0382                                                            |
| Q2A5D8 Q2A5D8_FRATH                          | NAD(P)-specific glutamate dehydrogenase FTL_0269                                        |
| Q2A5V4 TRPA_FRATH                            | Tryptophan synthase alpha chain trpA                                                    |
| <b>Carbohydrate transport and metabolism</b> |                                                                                         |
| Q2A278 ENO_FRATH                             | Enolase eno                                                                             |
| Q2A284 Q2A284_FRATH                          | Chitinase family 18 protein FTL_1521                                                    |
| Q2A2B1 GPMI_FRATH                            | 2,3-bisphosphoglycerate-independent phosphoglycerate mutase gpmI                        |
| Q2A2G7 Q2A2G7_FRATH                          | UDP-glucose 4-epimerase FTL_1430                                                        |
| Q2A368 Q2A368_FRATH                          | Pyruvate kinase FTL_1148                                                                |
| Q2A383 Q2A383_FRATH                          | Inositol-1-monophosphatase FTL_1132                                                     |
| Q2A4U2 Q2A4U2_FRATH                          | 4-alpha-glucanotransferase FTL_0488                                                     |
| Q2A543 Q2A543_FRATH                          | Mannose-6-phosphate isomerase, FTL_0383                                                 |
| Q2A5V7 Q2A5V7_FRATH                          | Chitinase FTL_0093                                                                      |
| Q2A369 PGK_FRATH                             | Phosphoglycerate kinase pgk                                                             |
| <b>Fatty acids and lipids metabolism</b>     |                                                                                         |
| Q2A1E1 Q2A1E1_FRATH                          | Lipase/acyltransferase FTL_1839                                                         |
| Q2A221 Q2A221_FRATH                          | Acetyl-CoA carboxylase, biotin carboxyl carrier protein subunit FTL_1592                |
| Q2A2F5 Q2A2F5_FRATH                          | Enoyl-[acyl-carrier-protein] reductase (NADH) FTL_1442                                  |
| Q2A377 Q2A377_FRATH                          | 3-oxoacyl-(Acyl-carrier-protein) reductase FTL_1139                                     |
| Q2A378 Q2A378_FRATH                          | Acyl carrier protein FTL_1138                                                           |
| Q2A4K6 Q2A4K6_FRATH                          | Long chain fatty acid CoA ligase FTL_0586                                               |
| Q2A4K8 Q2A4K8_FRATH                          | Fusion product of 3-hydroxyacyl-CoA dehydrogenase and acyl-CoA-binding protein FTL_0584 |
| Q2A4M9 Q2A4M9_FRATH                          | Delta 9 acyl-lipid fatty acid desaturase FTL_0557                                       |
| Q2A4Y0 PSD_FRATH                             | Phosphatidylserine decarboxylase proenzyme psd                                          |
| Q2A5B4 ACCA_FRATH                            | Acetyl-coenzyme A carboxylase carboxyl transferase subunit alpha accA                   |
| Q2A5H7 Q2A5H7_FRATH                          | Phosphatidate cytidyltransferase FTL_0229                                               |
| Q2A5L0 LPXD1_FRATH                           | UDP-3-O-[3-hydroxymyristoyl] glucosamine N-acyltransferase 1                            |

lpxD1

### **Energy metabolism**

Q2A1F6|Q2A1F6\_FRATH NADH-quinone oxidoreductase FTL\_1824  
Q2A1I8|Q2A1I8\_FRATH Citrate synthase FTL\_1789  
Q2A1J2|Q2A1J2\_FRATH Succinate dehydrogenase iron-sulfur protein FTL\_1785  
Q2A1J4|Q2A1J4\_FRATH Dihydrolipoamide succinyltransferase component of 2-oxoglutarate dehydrogenase complex FTL\_1783  
Q2A1S0|Q2A1S0\_FRATH GlpX protein FTL\_1701  
Q2A2X4|Q2A2X4\_FRATH Pyruvate/2-oxoglutarate dehydrogenase complex, dihydrolipoamide dehydrogenase component FTL\_1248  
Q2A370|Q2A370\_FRATH Glyceraldehyde-3-phosphate dehydrogenase FTL\_1146  
Q2A3E4|Q2A3E4\_FRATH Inorganic pyrophosphatase FTL\_1061  
Q2A4K4|Q2A4K4\_FRATH Isocitrate dehydrogenase FTL\_0588  
Q2A598|Q2A598\_FRATH Dihydrolipoamide dehydrogenase FTL\_0311  
Q2A599|Q2A599\_FRATH Pyruvate dehydrogenase, E2 component FTL\_0310  
Q2A5L5|Q2A5L5\_FRATH Cytochrome O ubiquinol oxidase subunit II FTL\_0191  
Q2A5L7|Q2A5L7\_FRATH Cytochrome d terminal oxidase, polypeptide subunit I FTL\_0189  
Q2A1K3|ACON\_FRATH Aconitate hydratase acn

### **Cofactors, prosthetic groups, electron carriers metabolism**

Q2A260|PDXS\_FRATH Pyridoxal biosynthesis lyase pdxS  
Q2A2C4|Q2A2C4\_FRATH Thiamine pyrophosphokinase FTL\_1477  
Q2A2W3|Q2A2W3\_FRATH 2-amino-4-hydroxy-6-hydroxymethyldihydropteridine pyrophosphokinase/dihydropteroyl synthase FTL\_1265  
H  
Q2A319|Q2A319\_FRATH Cobalamin (Vitamin B12) synthesis protein/P47K family protein FTL\_1200  
Q2A3K0|Q2A3K0\_FRATH AhpC/Tsa family protein FTL\_0996  
Q2A3N1|Q2A3N1\_FRATH Soluble pyridine nucleotide transhydrogenase FTL\_0960  
Q2A4C6|PANB\_FRATH 3-methyl-2-oxobutanoate hydroxymethyltransferase panB  
Q2A4C7|PANC\_FRATH Pantothenate synthetase panC  
Q2A563|Q2A563\_FRATH Putative uncharacterized protein FTL\_0356

### **Nucleotides and nucleosides metabolism**

Q2A1C4|Q2A1C4\_FRATH Amidophosphoribosyltransferase FTL\_1861  
Q2A2C3|Q2A2C3\_FRATH Inosine-5-monophosphate dehydrogenase FTL\_1478  
Q2A2X0|Q2A2X0\_FRATH ATP-dependent RNA helicase RhlE FTL\_1252  
Q2A311|DCD\_FRATH Deoxycytidine triphosphate deaminase dcd  
Q2A3L0|Q2A3L0\_FRATH Biofunctional protein, glutaredoxin 3 protein/Ribonucleoside-diphosphate reductase, beta subunit FTL\_0984  
Q2A3P2|Q2A3P2\_FRATH Ribose-phosphate pyrophosphokinase FTL\_0949  
Q2A5H6|DUT\_FRATH Deoxyuridine 5'-triphosphate nucleotidohydrolase dut

### **Other metabolism - biosynthesis**

Q2A2J0|SYT\_FRATH Threonyl-tRNA synthetase thrS  
Q2A3M3|Q2A3M3\_FRATH Tyrosyl-tRNA synthetase FTL\_0968  
Q2A4U1|SYGA\_FRATH Glycyl-tRNA synthetase alpha subunit glyQ  
Q2A5I8|SYE\_FRATH Glutamyl-tRNA synthetase gltX  
Q2A298|KATG\_FRATH Catalase-peroxidase katG  
Q2A2B3|Q2A2B3\_FRATH Cytidine deaminase FTL\_1488  
Q2A3V3|Q2A3V3\_FRATH Beta-lactamase FTL\_0879  
Q2A460|Q2A460\_FRATH Oxidoreductase, short-chain dehydrogenase family protein FTL\_0743

### **Putative enzymes**

Q2A2T7|Q2A2T7\_FRATH Short-chain dehydrogenase/reductase FTL\_1294

|                     |                                                                                               |
|---------------------|-----------------------------------------------------------------------------------------------|
| Q2A612 Q2A612_FRATH | Acid phosphatase FTL_0031                                                                     |
|                     | <b>Secondary metabolites biosynthesis, transport, and catabolism</b>                          |
| Q2A3R1 Q2A3R1_FRATH | DJ-1/PfpI family protein FTL_0928                                                             |
| Q2A3Y4 Q2A3Y4_FRATH | Isochorismatase hydrolase family protein FTL_0846                                             |
|                     | <b>Translation, ribosomal structure and biogenesis</b>                                        |
| Q2A1M0 EFTU_FRATH   | Elongation factor Tu tuf                                                                      |
| Q2A1M3 RL11_FRATH   | 50S ribosomal protein L11 rplK                                                                |
| Q2A269 PNP_FRATH    | Polyribonucleotide nucleotidyltransferase pnp                                                 |
| Q2A2A3 Q2A2A3_FRATH | Translation initiation inhibitor FTL_1498                                                     |
| Q2A2E4 RL21_FRATH   | 50S ribosomal protein L21 rplU                                                                |
| Q2A2J2 RL35_FRATH   | 50S ribosomal protein L35 rpmI                                                                |
| Q2A332 RL13_FRATH   | 50S ribosomal protein L13 rpmM                                                                |
| Q2A3H5 RL9_FRATH    | 50S ribosomal protein L9 rpmL                                                                 |
| Q2A484 Q2A484_FRATH | Ribonuclease E FTL_0717                                                                       |
| Q2A4R2 RL33_FRATH   | 50S ribosomal protein L33 rpmG                                                                |
| Q2A4X1 Q2A4X1_FRATH | Methionine aminopeptidase FTL_0459                                                            |
| Q2A5F4 RL18_FRATH   | 50S ribosomal protein L18 rpmR                                                                |
| Q2A5H2 EFG_FRATH    | Elongation factor G fusA                                                                      |
| Q2A5I1 EFTS_FRATH   | Elongation factor Ts tsf                                                                      |
| Q2A5I2 RS2_FRATH    | 30S ribosomal protein S2 rpsB                                                                 |
| Q2A5X7 RS20_FRATH   | 30S ribosomal protein S20 rpsT                                                                |
|                     | <b>Post-translational modification, protein turnover, chaperones</b>                          |
| P94797 CH10_FRATH   | 10 kDa chaperonin groS                                                                        |
| Q2A144 Q2A144_FRATH | Peptide methionine sulfoxide reductase msrA FTL_1960                                          |
| Q2A1U2 Q2A1U2_FRATH | Putative uncharacterized protein FTL_1678                                                     |
| Q2A2K4 Q2A2K4_FRATH | Peptidyl-prolyl cis-trans isomerase FTL_1393                                                  |
| Q2A2L3 Q2A2L3_FRATH | Glutathione peroxidase FTL_1383                                                               |
| Q2A327 DNAJ_FRATH   | Chaperone protein dnaJ                                                                        |
| Q2A328 DNAK_FRATH   | Chaperone protein dnaK                                                                        |
| Q2A3B3 Q2A3B3_FRATH | Macrophage infectivity potentiator, FTL_1097                                                  |
| Q2A3B5 Q2A3B5_FRATH | Peptide methionine sulfoxide reductase FTL_1093                                               |
| Q2A3M7 HSLU_FRATH   | ATP-dependent hsl protease ATP-binding subunit hslU hslU                                      |
| Q2A3T9 Q2A3T9_FRATH | ATP-dependent protease La FTL_0894                                                            |
| Q2A3U2 TIG_FRATH    | Trigger factor tig                                                                            |
| Q2A5E0 HTPG_FRATH   | Chaperone protein htpG                                                                        |
| Q2A5J9 Q2A5J9_FRATH | Pyrrrolidone-carboxylate peptidase FTL_0207                                                   |
| Q2A5V6 Q2A5V6_FRATH | ClpB protein FTL_0094                                                                         |
|                     | <b>Motility, attachment and secretion structure (Intracellular trafficking and secretion)</b> |
| Q2A1V9 Q2A1V9_FRATH | Hypothetical membrane protein FTL_1658                                                        |
| Q2A2Y3 Q2A2Y3_FRATH | Signal recognition particle protein, Ffh FTL_1239                                             |
| Q2A3Y2 Q2A3Y2_FRATH | Preprotein translocase, subunit D, membrane protein FTL_0848                                  |
| Q2A420 Q2A420_FRATH | Type IV pilin multimeric outer membrane protein FTL_0800                                      |
| Q2A422 Q2A422_FRATH | Type IV pili glycosylation protein FTL_0798                                                   |
| Q2A5B6 SECB2_FRATH  | Protein-export protein secB 2                                                                 |
|                     | <b>Transport</b>                                                                              |
| Q2A1C0 Q2A1C0_FRATH | Outer membrane protein tolC FTL_1865                                                          |
| Q2A3P4 Q2A3P4_FRATH | Major facilitator superfamily (MFS) transport protein FTL_0946                                |
| Q2A2E7 Q2A2E7_FRATH | Major facilitator superfamily (MFS) transport protein FTL_1450                                |

|                                                 |                                                                                          |
|-------------------------------------------------|------------------------------------------------------------------------------------------|
| Q2A205 FETP_FRATH                               | Probable Fe(2+)-trafficking protein FTL_1608                                             |
| Q2A3R3 Q2A3R3_FRATH                             | Ferritin-like protein FTL_0926                                                           |
| Q2A4H6 Q2A4H6_FRATH                             | Putative uncharacterized protein FTL_0617                                                |
| <b>Cell envelope biogenesis, outer membrane</b> |                                                                                          |
| Q2A1R5 LOLA_FRATH                               | Outer-membrane lipoprotein carrier protein lola                                          |
| Q2A292 Q2A292_FRATH                             | Glycerophosphoryl diester phosphodiesterase family protein FTL_1511                      |
| Q2A294 Q2A294_FRATH                             | D-alanyl-D-alanine carboxypeptidase/D-alanyl-D-alanine-endopeptidase FTL_1509            |
| Q2A2Q8 Q2A2Q8_FRATH                             | Outer membrane associated protein FTL_1328                                               |
| Q2A3E5 Q2A3E5_FRATH                             | D-alanyl-D-alanine carboxypeptidase (Penicillin binding protein) family protein FTL_1060 |
| Q2A3F6 Q2A3F6_FRATH                             | D-alanyl-D-alanine carboxypeptidase (Penicillin binding protein) family protein FTL_1046 |
| Q2A4L9 Q2A4L9_FRATH                             | Putative uncharacterized protein FTL_0573                                                |
| Q2A516 Q2A516_FRATH                             | UDP-N-acetylglucosamine 1-carboxyvinyltransferase FTL_0413                               |
| Q2A5M6 Q2A5M6_FRATH                             | Acyltransferase FTL_0180                                                                 |

#### Cell cycle

|                   |                                                   |
|-------------------|---------------------------------------------------|
| Q2A4R5 MINE_FRATH | Cell division topological specificity factor minE |
| Q9ZAW3 FTSZ_FRATH | Cell division protein ftsZ ftsZ                   |

#### DNA replication, recombination, and repair

|                     |                                                |
|---------------------|------------------------------------------------|
| Q2A237 Q2A237_FRATH | DNA mismatch repair protein FTL_1576           |
| Q2A259 Q2A259_FRATH | DNA gyrase subunit B FTL_1547                  |
| Q2A2C8 Q2A2C8_FRATH | DNA excision repair enzyme, subunit A FTL_1473 |
| Q2A2K5 Q2A2K5_FRATH | Cold-shock DEAD-box protein A FTL_1392         |
| Q2A3T8 Q2A3T8_FRATH | Histone-like protein HU form B FTL_0895        |
| Q2A4K2 Q2A4K2_FRATH | ATp-dependent helicase FTL_0590                |
| Q2A4Q7 Q2A4Q7_FRATH | Transposase isftu1                             |
| Q2A4Q9 Q2A4Q9_FRATH | ATP-dependent DNA helicase RecG FTL_0524       |
| Q2A4W8 Q2A4W8_FRATH | DNA topoisomerase IV subunit A FTL_0462        |
| H                   |                                                |
| Q2A504 Q2A504_FRATH | DNA topoisomerase I FTL_0426                   |
| Q2A627 Q2A627_FRATH | Single-stranded DNA-binding protein FTL_0014   |
| Q2A639 Q2A639_FRATH | DNA polymerase III, beta chain FTL_0002        |

#### Regulation of gene expression, RNA-binding

|                  |             |
|------------------|-------------|
| Q2A3T5 HFQ_FRATH | Protein hfq |
|------------------|-------------|

#### Signal transduction and regulation

|                     |                                                                     |
|---------------------|---------------------------------------------------------------------|
| Q2A207 Q2A207_FRATH | Stringent starvation protein A, regulator of transcription FTL_1606 |
| Q2A2Z0 Q2A2Z0_FRATH | Putative uncharacterized protein FTL_1231                           |
| Q2A4N4 Q2A4N4_FRATH | Two-component response regulator FTL_0552                           |
| Q2A4X3 Q2A4X3_FRATH | Cold shock protein FTL_0457                                         |

#### Transcription

|                     |                                                   |
|---------------------|---------------------------------------------------|
| Q2A1M8 RPOC_FRATH   | DNA-directed RNA polymerase subunit beta' rpoC    |
| Q2A3F2 Q2A3F2_FRATH | RNA polymerase sigma factor FTL_1050              |
| Q2A4I2 Q2A4I2_FRATH | Transcription termination factor Rho FTL_0610     |
| Q2A5E5 RPOA1_FRATH  | DNA-directed RNA polymerase subunit alpha 1 rpoA1 |

#### Unknown function - conserved

|                     |                                           |
|---------------------|-------------------------------------------|
| Q2A2G0 Q2A2G0_FRATH | Putative uncharacterized protein FTL_1437 |
| Q2A2S5 Q2A2S5_FRATH | Putative uncharacterized protein FTL_1306 |
| Q2A2W1 Q2A2W1_FRATH | Putative uncharacterized protein FTL_1267 |



H

|                     |                                           |
|---------------------|-------------------------------------------|
| Q2A347 Q2A347_FRATH | Putative uncharacterized protein FTL_0125 |
| Q2A372 Q2A372_FRATH | Putative uncharacterized protein FTL_1144 |
| Q2A3E6 Q2A3E6_FRATH | Putative uncharacterized protein FTL_1059 |
| Q2A3L6 Q2A3L6_FRATH | Putative uncharacterized protein FTL_0977 |
| Q2A3P8 Q2A3P8_FRATH | Putative uncharacterized protein FTL_0941 |
| Q2A3R0 Y929_FRATH   | UPF0082 protein FTL_0929 FTL_0929         |
| Q2A4P7 Q2A4P7_FRATH | Outer membrane protein OmpH FTL_0536      |
| Q2A565 Q2A565_FRATH | Putative uncharacterized protein FTL_0354 |
| Q2A632 Q2A632_FRATH | Outer membrane protein FTL_0009           |

**Unknown function - novel**

|                     |                                                |
|---------------------|------------------------------------------------|
| P18149 MP17_FRATH   | 17 kDa major membrane protein FTL_0421         |
| Q2A1C8 Q2A1C8_FRATH | Putative uncharacterized protein FTL_1852      |
| Q2A1I4 Q2A1I4_FRATH | Putative uncharacterized protein FTL_1793      |
| Q2A234 Q2A234_FRATH | Putative uncharacterized protein FTL_1579      |
| Q2A254 Q2A254_FRATH | Hypothetical membrane protein FTL_1552         |
| Q2A274 Q2A274_FRATH | Putative uncharacterized protein FTL_1532      |
| Q2A2A7 Q2A2A7_FRATH | Putative uncharacterized protein FTL_1494      |
| Q2A2M0 Q2A2M0_FRATH | Putative uncharacterized protein FTL_1371      |
| Q2A2Z4 Q2A2Z4_FRATH | Putative uncharacterized protein FTL_1225      |
| Q2A355 Q2A355_FRATH | Putative uncharacterized protein FTL_0117      |
| Q2A358 Q2A358_FRATH | Intracellular growth locus, subunit D FTL_0114 |
| Q2A358 Q2A358_FRATH | Intracellular growth locus, subunit D FTL_0114 |
| Q2A3A5 Q2A3A5_FRATH | Putative uncharacterized protein FTL_1110      |
| Q2A3B8 Q2A3B8_FRATH | Putative uncharacterized protein FTL_1088      |
| Q2A3D0 Q2A3D0_FRATH | Putative uncharacterized protein FTL_1075      |
| Q2A3G5 Q2A3G5_FRATH | Putative uncharacterized protein FTL_1037      |
| Q2A3J9 Q2A3J9_FRATH | Putative uncharacterized protein FTL_0997      |
| Q2A3K2 Q2A3K2_FRATH | Putative uncharacterized protein FTL_0994      |
| Q2A3V2 Q2A3V2_FRATH | Putative uncharacterized protein FTL_0880      |
| Q2A3W0 Q2A3W0_FRATH | Putative uncharacterized protein FTL_0870      |

H

|                     |                                           |
|---------------------|-------------------------------------------|
| Q2A404 Q2A404_FRATH | Hypothetical lipoprotein FTL_0823         |
| Q2A405 Q2A405_FRATH | Putative uncharacterized protein FTL_0822 |
| Q2A4A7 Q2A4A7_FRATH | Putative uncharacterized protein FTL_0694 |
| Q2A4D9 Q2A4D9_FRATH | Putative uncharacterized protein FTL_0661 |
| Q2A4E4 Q2A4E4_FRATH | Hypothetical membrane protein FTL_0655    |
| Q2A4M0 Q2A4M0_FRATH | Putative uncharacterized protein FTL_0572 |
| Q2A4M3 Q2A4M3_FRATH | Outer membrane protein FTL_0569           |
| Q2A4Z1 Q2A4Z1_FRATH | Putative uncharacterized protein FTL_0439 |
| Q2A518 Q2A518_FRATH | Putative uncharacterized protein FTL_0411 |
| Q2A5N2 Q2A5N2_FRATH | Putative uncharacterized protein FTL_0174 |
| Q2A5V5 Q2A5V5_FRATH | Putative uncharacterized protein FTL_0097 |

**Table S2.** Junction peptides identified by MudPIT-LC-MS-MS analysis of *F. tularensis* tmRNA- tagged proteins.

| UniProt ID           | Protein Description    | Junction peptide                   | Tagged peptide          | Protein length | Tagged site | MQScore | pValue |
|----------------------|------------------------|------------------------------------|-------------------------|----------------|-------------|---------|--------|
| spiP18149IMP17_FRATH | 17 kDa major membrane  | K.DTAAQTATTEQAAAVSKPAGNK.K         | DTAAQTATTEQAAAVSKP      | 149            | 55          | 2.413   | 0.006  |
| spiP94797ICH10_FRATH | 10 kDa chaperonin groS | K.VGDETLLAGNK.K                    | VGDETL                  | 95             | 83          | 3.589   | 0.004  |
| spiP94797ICH10_FRATH | 10 kDa chaperonin groS | E.TLLMMREEDIMGIAGNKK.E             | TLLMMREEDIMGI           | 95             | 93          | 2.88    | 0.001  |
| spiP94797ICH10_FRATH | 10 kDa chaperonin groS | K.VGDETLMMREEDIMGIAGNKK.E          | VGDETLMMREEDIMGI        | 95             | 93          | 3.439   | 0.001  |
| spiP94797ICH10_FRATH | 10 kDa chaperonin groS | E.DIMGIIAGNKK.E.N                  | DIMGII                  | 95             | 94          | 3.759   | 0.002  |
| spiP94797ICH10_FRATH | 10 kDa chaperonin groS | R.EEDIMGIIAGNKKENR.V               | EEDIMGII                | 95             | 94          | 3.684   | 0.009  |
| spiP94797ICH10_FRATH | 10 kDa chaperonin groS | R.EEDIMGIIAGNKK.E                  | EEDIMGII                | 95             | 94          | 3.419   | 0.000  |
| spiP94797ICH10_FRATH | 10 kDa chaperonin groS | D.IMGIIAGNKK.E.N                   | IMGII                   | 95             | 94          | 3.071   | 0.002  |
| spiP94797ICH10_FRATH | 10 kDa chaperonin groS | E.TLLMMREEDIMGIAGNKK.E             | TLLMMREEDIMGII          | 95             | 94          | 3.751   | 0.000  |
| spiP94797ICH10_FRATH | 10 kDa chaperonin groS | E.TLLMMREEDIMGIAGNKK.E.N           | TLLMMREEDIMGII          | 95             | 94          | 3.595   | 0.001  |
| spiP94797ICH10_FRATH | 10 kDa chaperonin groS | E.TLLMM+16REEDIMGIAGNKK.E          | TLLMMREEDIMGII          | 95             | 94          | 2.805   | 0.006  |
| spiP94797ICH10_FRATH | 10 kDa chaperonin groS | E.TLLMMREEDIM+16GIIAGNKK.E.N       | TLLMMREEDIMGII          | 95             | 94          | 2.786   | 0.002  |
| spiP94797ICH10_FRATH | 10 kDa chaperonin groS | E.TLLMM+16REEDIMGIAGNKK.E.N        | TLLMMREEDIMGII          | 95             | 94          | 2.735   | 0.000  |
| spiP94797ICH10_FRATH | 10 kDa chaperonin groS | K.VGDETLMMREEDIMGIAGNK.K           | VGDETLMMREEDIMGII       | 95             | 94          | 4.507   | 0.000  |
| spiP94797ICH10_FRATH | 10 kDa chaperonin groS | K.VGDETLMMREEDIMGIAGNKK.E          | VGDETLMMREEDIMGII       | 95             | 94          | 4.303   | 0.000  |
| spiP94797ICH10_FRATH | 10 kDa chaperonin groS | K.VGDETLMM+16REEDIMGIAGNKK.E       | VGDETLMMREEDIMGII       | 95             | 94          | 3.233   | 0.000  |
| spiP94797ICH10_FRATH | 10 kDa chaperonin groS | K.VGDETLMM+16M+16REEDIMGIAGNK.K    | VGDETLMMREEDIMGII       | 95             | 94          | 2.895   | 0.001  |
| spiP94797ICH10_FRATH | 10 kDa chaperonin groS | E.DIMGIIAAGNKK.E.N                 | DIMGIIA                 | 95             | 95          | 3.948   | 0.000  |
| spiP94797ICH10_FRATH | 10 kDa chaperonin groS | E.EDIMGIIAAGNKK.E.N                | EDIMGIIA                | 95             | 95          | 2.878   | 0.001  |
| spiP94797ICH10_FRATH | 10 kDa chaperonin groS | R.EEDIMGIIAAGNKK.E                 | EEDIMGIIA               | 95             | 95          | 3.638   | 0.000  |
| spiP94797ICH10_FRATH | 10 kDa chaperonin groS | E.TLLMMREEDIMGIIAAGNKK.E.N         | TLLMMREEDIMGIIA         | 95             | 95          | 3.674   | 0.000  |
| spiP94797ICH10_FRATH | 10 kDa chaperonin groS | E.TLLMMREEDIMGIIAAGNKK.E           | TLLMMREEDIMGIIA         | 95             | 95          | 3.606   | 0.000  |
| spiP94797ICH10_FRATH | 10 kDa chaperonin groS | K.VGDETLMMREEDIMGIIAAGNKK.E        | VGDETLMMREEDIMGIIA      | 95             | 95          | 3.79    | 0.000  |
| spiP94797ICH10_FRATH | 10 kDa chaperonin groS | K.VGDETLMMREEDIMGIIAAGNK.K         | VGDETLMMREEDIMGIIA      | 95             | 95          | 3.168   | 0.000  |
| spiP94797ICH10_FRATH | 10 kDa chaperonin groS | K.VGDETLMM+16REEDIMGIIAAGNKK.E     | VGDETLMMREEDIMGIIA      | 95             | 95          | 2.936   | 0.000  |
| spiP94797ICH10_FRATH | 10 kDa chaperonin groS | K.VGDETLMMREEDIM+16GIIAAGNKK.E     | VGDETLMMREEDIMGIIA      | 95             | 95          | 2.604   | 0.000  |
| spiP94798ICH60_FRATH | 60 kDa chaperonin groL | E.GLKAVTAGMNPMDLKRIGDKATAAGNKK.E.N | GLKAVTAGMNPMDLKRIGDKATA | 544            | 125         | 3.038   | 0.010  |
| spiP94798ICH60_FRATH | 60 kDa chaperonin groL | E.GIVAGGGVAAGNKK.E.N               | GIVAGGGVA               | 544            | 418         | 4.1     | 0.000  |
| spiP94798ICH60_FRATH | 60 kDa chaperonin groL | R.KAIEAPLAGNK.K                    | KAIEAPL                 | 544            | 451         | 3.104   | 0.003  |
| spiP94798ICH60_FRATH | 60 kDa chaperonin groL | E.SSVVVNQVKAAGNKK.E.N              | SSVVVNQVKA              | 544            | 471         | 3.972   | 0.000  |
| spiP94798ICH60_FRATH | 60 kDa chaperonin groL | E.SSVVVNQVKANAGNKK.E.N             | SSVVVNQVKAN             | 544            | 472         | 3.233   | 0.000  |
| spiP94798ICH60_FRATH | 60 kDa chaperonin groL | E.SSVVVNQVKANQAGNKK.E.N            | SSVVVNQVKANQ            | 544            | 473         | 3.231   | 0.000  |

**Table S2.** Junction peptides identified by MudPIT-LC-MS-MS analysis of *F. tularensis* tmRNA- tagged proteins.

|                      |                        |                                     |                             |     |     |       |       |
|----------------------|------------------------|-------------------------------------|-----------------------------|-----|-----|-------|-------|
| splP94798ICH60_FRATH | 60 kDa chaperonin groL | E.SSVVVNQVKANQGAGNKKE.N             | SSVVVNQVKANQG               | 544 | 474 | 2.632 | 0.000 |
| splP94798ICH60_FRATH | 60 kDa chaperonin groL | E.SSVVVNQVKANQGNYGAGNKKE.N          | SSVVVNQVKANQNYG             | 544 | 477 | 3.405 | 0.000 |
| splP94798ICH60_FRATH | 60 kDa chaperonin groL | E.SSVVVNQVKANQNGYNAAGNKKE.N         | SSVVVNQVKANQNGYNA           | 544 | 480 | 3.018 | 0.000 |
| splP94798ICH60_FRATH | 60 kDa chaperonin groL | E.SSVVVNQVKANQNGYNAANAGNKKE.N       | SSVVVNQVKANQNGYNAAN         | 544 | 482 | 2.835 | 0.000 |
| splP94798ICH60_FRATH | 60 kDa chaperonin groL | R.SALQHAASIAGNK.K                   | SALQHAASI                   | 544 | 510 | 3.702 | 0.001 |
| splP94798ICH60_FRATH | 60 kDa chaperonin groL | R.SALQHAASIAAGNK.K                  | SALQHAASIA                  | 544 | 511 | 4.346 | 0.000 |
| splP94798ICH60_FRATH | 60 kDa chaperonin groL | R.SALQHAASIAGLAGNK.K                | SALQHAASIAGL                | 544 | 513 | 4.381 | 0.000 |
| splP94798ICH60_FRATH | 60 kDa chaperonin groL | R.SALQHAASIAGLAGNKK.E               | SALQHAASIAGL                | 544 | 513 | 3.34  | 0.000 |
| splP94798ICH60_FRATH | 60 kDa chaperonin groL | R.SALQHAASIAGLMAGNK.K               | SALQHAASIAGLM               | 544 | 514 | 4.425 | 0.000 |
| splP94798ICH60_FRATH | 60 kDa chaperonin groL | R.SALQHAASIAGLMAGNKK.E              | SALQHAASIAGLM               | 544 | 514 | 3.86  | 0.000 |
| splP94798ICH60_FRATH | 60 kDa chaperonin groL | R.SALQHAASIAGLM+16AGNK.K            | SALQHAASIAGLM               | 544 | 514 | 3.75  | 0.003 |
| splP94798ICH60_FRATH | 60 kDa chaperonin groL | R.SALQHAASIAGLMIAGNK.K              | SALQHAASIAGLMI              | 544 | 515 | 4.362 | 0.000 |
| splP94798ICH60_FRATH | 60 kDa chaperonin groL | R.SALQHAASIAGLMIAGNKK.E             | SALQHAASIAGLMI              | 544 | 515 | 4.232 | 0.000 |
| splP94798ICH60_FRATH | 60 kDa chaperonin groL | R.SALQHAASIAGLM+16IAGNK.K           | SALQHAASIAGLMI              | 544 | 515 | 4.025 | 0.000 |
| splP94798ICH60_FRATH | 60 kDa chaperonin groL | R.SALQHAASIAGLMITAGNK.K             | SALQHAASIAGLMIT             | 544 | 516 | 4.241 | 0.000 |
| splP94798ICH60_FRATH | 60 kDa chaperonin groL | R.SALQHAASIAGLMITAGNKK.E            | SALQHAASIAGLMIT             | 544 | 516 | 4.202 | 0.000 |
| splP94798ICH60_FRATH | 60 kDa chaperonin groL | R.SALQHAASIAGLM+16ITAGNK.K          | SALQHAASIAGLMIT             | 544 | 516 | 3.979 | 0.000 |
| splP94798ICH60_FRATH | 60 kDa chaperonin groL | R.SALQHAASIAGLMITAGNKKE.N           | SALQHAASIAGLMIT             | 544 | 516 | 3.291 | 0.000 |
| splP94798ICH60_FRATH | 60 kDa chaperonin groL | R.SALQHAASIAGLMITTAGNK.K            | SALQHAASIAGLMITT            | 544 | 517 | 4.503 | 0.000 |
| splP94798ICH60_FRATH | 60 kDa chaperonin groL | R.SALQHAASIAGLMITTAGNKK.E           | SALQHAASIAGLMITT            | 544 | 517 | 3.777 | 0.001 |
| splP94798ICH60_FRATH | 60 kDa chaperonin groL | R.SALQHAASIAGLM+16ITTAGNK.K         | SALQHAASIAGLMITT            | 544 | 517 | 3.501 | 0.001 |
| splP94798ICH60_FRATH | 60 kDa chaperonin groL | R.SALQHAASIAGLMITTEAGNK.K           | SALQHAASIAGLMITTE           | 544 | 518 | 4.248 | 0.002 |
| splP94798ICH60_FRATH | 60 kDa chaperonin groL | R.SALQHAASIAGLMITTEAAGNK.K          | SALQHAASIAGLMITTEA          | 544 | 519 | 4.259 | 0.000 |
| splP94798ICH60_FRATH | 60 kDa chaperonin groL | R.SALQHAASIAGLMITTEAAGNKK.E         | SALQHAASIAGLMITTEA          | 544 | 519 | 3.736 | 0.000 |
| splP94798ICH60_FRATH | 60 kDa chaperonin groL | R.SALQHAASIAGLM+16ITTEAAGNKK.E      | SALQHAASIAGLMITTEA          | 544 | 519 | 2.127 | 0.001 |
| splP94798ICH60_FRATH | 60 kDa chaperonin groL | R.SALQHAASIAGLMITTEAMAGNK.K         | SALQHAASIAGLMITTEAM         | 544 | 520 | 2.956 | 0.000 |
| splP94798ICH60_FRATH | 60 kDa chaperonin groL | R.SALQHAASIAGLMITTEAM+16AGNK.K      | SALQHAASIAGLMITTEAM         | 544 | 520 | 2.046 | 0.006 |
| splP94798ICH60_FRATH | 60 kDa chaperonin groL | R.SALQHAASIAGLMITTEAM+16IAGNK.K     | SALQHAASIAGLMITTEAMI        | 544 | 521 | 2.064 | 0.007 |
| splP94798ICH60_FRATH | 60 kDa chaperonin groL | R.SALQHAASIAGLMITTEAMIAGNK.K        | SALQHAASIAGLMITTEAMI        | 544 | 521 | 2.056 | 0.006 |
| splP94798ICH60_FRATH | 60 kDa chaperonin groL | R.SALQHAASIAGLMITTEAMIGEIKAGNK.K    | SALQHAASIAGLMITTEAMIGEIK    | 544 | 525 | 3.719 | 0.001 |
| splP94798ICH60_FRATH | 60 kDa chaperonin groL | R.SALQHAASIAGLMITTEAMIGEIKEAAAGNK.K | SALQHAASIAGLMITTEAMIGEIKEAA | 544 | 528 | 3.673 | 0.001 |
| splP94798ICH60_FRATH | 60 kDa chaperonin groL | E.AAPAAGNKKENR.V                    | AAPA                        | 544 | 530 | 4.225 | 0.009 |
| splP94798ICH60_FRATH | 60 kDa chaperonin groL | E.AAPAAGNKKE.N                      | AAPA                        | 544 | 530 | 3.475 | 0.000 |

**Table S2.** Junction peptides identified by MudPIT-LC-MS-MS analysis of *F. tularensis* tmRNA- tagged proteins.

|                      |                        |                                       |                               |     |     |       |       |
|----------------------|------------------------|---------------------------------------|-------------------------------|-----|-----|-------|-------|
| splP94798ICH60_FRATH | 60 kDa chaperonin groL | R.SALQHAASIAGLMITTEAMIGEIKEAAPAAGNK.K | SALQHAASIAGLMITTEAMIGEIKEAAPA | 544 | 530 | 3.868 | 0.000 |
| splP94798ICH60_FRATH | 60 kDa chaperonin groL | E.AAPAMPAGNKKE.N                      | AAPAMP                        | 544 | 532 | 4.124 | 0.000 |
| splP94798ICH60_FRATH | 60 kDa chaperonin groL | E.AAPAMPAGNKK.E                       | AAPAMP                        | 544 | 532 | 3.333 | 0.000 |
| splP94798ICH60_FRATH | 60 kDa chaperonin groL | E.AAPAM+16PAGNKKE.N                   | AAPAMP                        | 544 | 532 | 2.84  | 0.000 |
| splP94798ICH60_FRATH | 60 kDa chaperonin groL | E.AAPAMPAGNK.K                        | AAPAMP                        | 544 | 532 | 2.022 | 0.005 |
| splP94798ICH60_FRATH | 60 kDa chaperonin groL | K.EAAPAMPAGNKK.E                      | EAAPAMP                       | 544 | 532 | 3.85  | 0.001 |
| splP94798ICH60_FRATH | 60 kDa chaperonin groL | E.AAPAMPMAGNKKE.N                     | AAPAMPM                       | 544 | 533 | 4.227 | 0.000 |
| splP94798ICH60_FRATH | 60 kDa chaperonin groL | E.AAPAMPMAGNKK.E                      | AAPAMPM                       | 544 | 533 | 3.632 | 0.000 |
| splP94798ICH60_FRATH | 60 kDa chaperonin groL | E.AAPAM+16PMAGNKK.E.N                 | AAPAMPM                       | 544 | 533 | 3.594 | 0.001 |
| splP94798ICH60_FRATH | 60 kDa chaperonin groL | E.AAPAMPM+16AGNKK.E.N                 | AAPAMPM                       | 544 | 533 | 3.594 | 0.000 |
| splP94798ICH60_FRATH | 60 kDa chaperonin groL | E.AAPAMPM+16AGNK.K                    | AAPAMPM                       | 544 | 533 | 2.749 | 0.002 |
| splP94798ICH60_FRATH | 60 kDa chaperonin groL | *.EAAPAMPMAGNKK.E                     | EAAPAMPM                      | 544 | 533 | 4.052 | 0.000 |
| splP94798ICH60_FRATH | 60 kDa chaperonin groL | *.EAAPAM+16PM+16AGNK.K                | EAAPAMPM                      | 544 | 533 | 3.268 | 0.000 |
| splP94798ICH60_FRATH | 60 kDa chaperonin groL | E.AAPAMPMGAGNKKE.N                    | AAPAMPMG                      | 544 | 534 | 4.229 | 0.000 |
| splP94798ICH60_FRATH | 60 kDa chaperonin groL | E.AAPAMPMGAGNKK.E                     | AAPAMPMG                      | 544 | 534 | 4.026 | 0.000 |
| splP94798ICH60_FRATH | 60 kDa chaperonin groL | E.AAPAMPM+16GAGNKKE.N                 | AAPAMPMG                      | 544 | 534 | 3.658 | 0.000 |
| splP94798ICH60_FRATH | 60 kDa chaperonin groL | E.AAPAM+16PM+16GAGNK.K                | AAPAMPMG                      | 544 | 534 | 3.48  | 0.000 |
| splP94798ICH60_FRATH | 60 kDa chaperonin groL | E.AAPAM+16PMGAGNKKE.N                 | AAPAMPMG                      | 544 | 534 | 3.48  | 0.000 |
| splP94798ICH60_FRATH | 60 kDa chaperonin groL | E.AAPAMPMGAGNK.K                      | AAPAMPMG                      | 544 | 534 | 3.355 | 0.000 |
| splP94798ICH60_FRATH | 60 kDa chaperonin groL | E.AAPAMPM+16GAGNK.K                   | AAPAMPMG                      | 544 | 534 | 2.941 | 0.001 |
| splP94798ICH60_FRATH | 60 kDa chaperonin groL | E.AAPAM+16PM+16GAGNKKE.N              | AAPAMPMG                      | 544 | 534 | 2.282 | 0.000 |
| splP94798ICH60_FRATH | 60 kDa chaperonin groL | *.EAAPAMPMGAGNKK.E                    | EAAPAMPMG                     | 544 | 534 | 4.019 | 0.000 |
| splP94798ICH60_FRATH | 60 kDa chaperonin groL | *.EAAPAM+16PM+16GAGNK.K               | EAAPAMPMG                     | 544 | 534 | 3.523 | 0.004 |
| splP94798ICH60_FRATH | 60 kDa chaperonin groL | *.EAAPAMPM+16GAGNK.K                  | EAAPAMPMG                     | 544 | 534 | 2.554 | 0.001 |
| splP94798ICH60_FRATH | 60 kDa chaperonin groL | *.EAAPAMPM+16GAGNKK.E                 | EAAPAMPMG                     | 544 | 534 | 2.272 | 0.000 |
| splP94798ICH60_FRATH | 60 kDa chaperonin groL | *.EAAPAM+16PM+16GAGNKK.E              | EAAPAMPMG                     | 544 | 534 | 2.27  | 0.000 |
| splP94798ICH60_FRATH | 60 kDa chaperonin groL | E.AAPAMPMGGAGNKKE.N                   | AAPAMPMGG                     | 544 | 535 | 4.398 | 0.001 |
| splP94798ICH60_FRATH | 60 kDa chaperonin groL | E.AAPAMPMGGAGNKK.E                    | AAPAMPMGG                     | 544 | 535 | 4.313 | 0.000 |
| splP94798ICH60_FRATH | 60 kDa chaperonin groL | E.AAPAMPM+16GGAGNK.K                  | AAPAMPMGG                     | 544 | 535 | 3.88  | 0.000 |
| splP94798ICH60_FRATH | 60 kDa chaperonin groL | E.AAPAMPM+16GGAGNKKE.N                | AAPAMPMGG                     | 544 | 535 | 3.616 | 0.001 |
| splP94798ICH60_FRATH | 60 kDa chaperonin groL | E.AAPAM+16PMGGAGNK.K                  | AAPAMPMGG                     | 544 | 535 | 3.601 | 0.000 |
| splP94798ICH60_FRATH | 60 kDa chaperonin groL | E.AAPAM+16PM+16GGAGNK.K               | AAPAMPMGG                     | 544 | 535 | 3.55  | 0.000 |
| splP94798ICH60_FRATH | 60 kDa chaperonin groL | E.AAPAM+16PMGGAGNKKE.N                | AAPAMPMGG                     | 544 | 535 | 3.477 | 0.001 |

**Table S2.** Junction peptides identified by MudPIT-LC-MS-MS analysis of *F. tularensis* tmRNA- tagged proteins.

|                      |                        |                          |            |     |     |       |       |
|----------------------|------------------------|--------------------------|------------|-----|-----|-------|-------|
| splP94798ICH60_FRATH | 60 kDa chaperonin groL | E.AAPAM+16PMGGAGNKK.E    | AAPAMPMG   | 544 | 535 | 2.651 | 0.000 |
| splP94798ICH60_FRATH | 60 kDa chaperonin groL | E.AAPAM+16PM+16GGAGNKE.N | AAPAMPMG   | 544 | 535 | 2.238 | 0.003 |
| splP94798ICH60_FRATH | 60 kDa chaperonin groL | *.EAAPAMP+16GGAGNK.K     | EAAPAMPMG  | 544 | 535 | 3.753 | 0.000 |
| splP94798ICH60_FRATH | 60 kDa chaperonin groL | *.EAAPAMP+16GGAGNKK.E    | EAAPAMPMG  | 544 | 535 | 3.75  | 0.000 |
| splP94798ICH60_FRATH | 60 kDa chaperonin groL | *.EAAPAMP+16GGAGNKK.K    | EAAPAMPMG  | 544 | 535 | 3.615 | 0.005 |
| splP94798ICH60_FRATH | 60 kDa chaperonin groL | *.EAAPAM+16PMGGAGNKK.E   | EAAPAMPMG  | 544 | 535 | 2.673 | 0.000 |
| splP94798ICH60_FRATH | 60 kDa chaperonin groL | *.EAAPAM+16PM+16GGAGNK.K | EAAPAMPMG  | 544 | 535 | 2.596 | 0.002 |
| splP94798ICH60_FRATH | 60 kDa chaperonin groL | *.EAAPAMP+16GGAGNKK.E    | EAAPAMPMG  | 544 | 535 | 2.513 | 0.000 |
| splP94798ICH60_FRATH | 60 kDa chaperonin groL | E.AAPAMP+16GGAGNKK.E     | AAPAMPGG   | 544 | 536 | 4.339 | 0.000 |
| splP94798ICH60_FRATH | 60 kDa chaperonin groL | E.AAPAMP+16GGAGNKK.E.N   | AAPAMPGG   | 544 | 536 | 4.264 | 0.009 |
| splP94798ICH60_FRATH | 60 kDa chaperonin groL | E.AAPAM+16PMGGAGNK.K     | AAPAMPGG   | 544 | 536 | 3.977 | 0.000 |
| splP94798ICH60_FRATH | 60 kDa chaperonin groL | E.AAPAMP+16GGAGNK.K      | AAPAMPGG   | 544 | 536 | 3.855 | 0.000 |
| splP94798ICH60_FRATH | 60 kDa chaperonin groL | E.AAPAM+16PMGGAGNKK.E.N  | AAPAMPGG   | 544 | 536 | 3.453 | 0.000 |
| splP94798ICH60_FRATH | 60 kDa chaperonin groL | E.AAPAMP+16GGAGNKK.E.N   | AAPAMPGG   | 544 | 536 | 3.368 | 0.000 |
| splP94798ICH60_FRATH | 60 kDa chaperonin groL | E.AAPAM+16PM+16GGAGNK.K  | AAPAMPGG   | 544 | 536 | 3.248 | 0.000 |
| splP94798ICH60_FRATH | 60 kDa chaperonin groL | E.AAPAMP+16GGAGNKK.E     | AAPAMPGG   | 544 | 536 | 2.99  | 0.000 |
| splP94798ICH60_FRATH | 60 kDa chaperonin groL | *.EAAPAMP+16GGAGNKK.E    | EAAPAMPGG  | 544 | 536 | 4.083 | 0.000 |
| splP94798ICH60_FRATH | 60 kDa chaperonin groL | *.EAAPAM+16PM+16GGAGNK.K | EAAPAMPGG  | 544 | 536 | 3.608 | 0.000 |
| splP94798ICH60_FRATH | 60 kDa chaperonin groL | *.EAAPAMP+16GGAGNKK.E    | EAAPAMPGG  | 544 | 536 | 2.289 | 0.000 |
| splP94798ICH60_FRATH | 60 kDa chaperonin groL | E.AAPAMP+16GGAGNKK.E.N   | AAPAMPGGM  | 544 | 537 | 4.539 | 0.000 |
| splP94798ICH60_FRATH | 60 kDa chaperonin groL | E.AAPAMP+16GGAGNKK.E     | AAPAMPGGM  | 544 | 537 | 3.961 | 0.000 |
| splP94798ICH60_FRATH | 60 kDa chaperonin groL | E.AAPAMP+16GGAGNKK.E.N   | AAPAMPGGM  | 544 | 537 | 3.814 | 0.000 |
| splP94798ICH60_FRATH | 60 kDa chaperonin groL | E.AAPAMP+16GGAGNKK.K     | AAPAMPGGM  | 544 | 537 | 3.332 | 0.000 |
| splP94798ICH60_FRATH | 60 kDa chaperonin groL | E.AAPAMP+16GGAGNKK.K     | AAPAMPGGM  | 544 | 537 | 3.327 | 0.000 |
| splP94798ICH60_FRATH | 60 kDa chaperonin groL | E.AAPAM+16PM+16GGAGNKK.K | AAPAMPGGM  | 544 | 537 | 2.777 | 0.003 |
| splP94798ICH60_FRATH | 60 kDa chaperonin groL | E.AAPAMP+16GGAGNKK.K     | AAPAMPGGM  | 544 | 537 | 2.741 | 0.000 |
| splP94798ICH60_FRATH | 60 kDa chaperonin groL | E.AAPAMP+16PMGGAGNKK.K   | AAPAMPGGM  | 544 | 537 | 2.616 | 0.000 |
| splP94798ICH60_FRATH | 60 kDa chaperonin groL | E.AAPAMP+16GGAGNKK.K     | AAPAMPGGM  | 544 | 537 | 2.499 | 0.000 |
| splP94798ICH60_FRATH | 60 kDa chaperonin groL | E.AAPAMP+16GGAGNKK.E     | AAPAMPGGM  | 544 | 537 | 2.368 | 0.000 |
| splP94798ICH60_FRATH | 60 kDa chaperonin groL | *.EAAPAMP+16GGAGNKK.E    | EAAPAMPGGM | 544 | 537 | 3.399 | 0.000 |
| splP94798ICH60_FRATH | 60 kDa chaperonin groL | E.AAPAMP+16GGAGNKK.E.N   | AAPAMPGGMG | 544 | 538 | 4.552 | 0.000 |
| splP94798ICH60_FRATH | 60 kDa chaperonin groL | E.AAPAMP+16GGAGNKK.E     | AAPAMPGGMG | 544 | 538 | 4.361 | 0.000 |
| splP94798ICH60_FRATH | 60 kDa chaperonin groL | E.AAPAMP+16GGAGNKK.K     | AAPAMPGGMG | 544 | 538 | 4.139 | 0.000 |

**Table S2.** Junction peptides identified by MudPIT-LC-MS-MS analysis of *F. tularensis* tmRNA- tagged proteins.

|                      |                        |                               |               |     |     |       |       |
|----------------------|------------------------|-------------------------------|---------------|-----|-----|-------|-------|
| splP94798ICH60_FRATH | 60 kDa chaperonin groL | E.AAPAM+16PMGGGMGAGNKKE.N     | AAPAMPGGGMG   | 544 | 538 | 3.504 | 0.000 |
| splP94798ICH60_FRATH | 60 kDa chaperonin groL | E.AAPAMP+16GGGMGAGNKKE.N      | AAPAMPGGGMG   | 544 | 538 | 3.367 | 0.000 |
| splP94798ICH60_FRATH | 60 kDa chaperonin groL | E.AAPAM+16PM+16GGGMGAGNK.K    | AAPAMPGGGMG   | 544 | 538 | 3.291 | 0.000 |
| splP94798ICH60_FRATH | 60 kDa chaperonin groL | E.AAPAMP+16GGGMGAGNKKE.E      | AAPAMPGGGMG   | 544 | 538 | 3.137 | 0.000 |
| splP94798ICH60_FRATH | 60 kDa chaperonin groL | E.AAPAMP+16GGGMGAGNK.K        | AAPAMPGGGMG   | 544 | 538 | 2.711 | 0.000 |
| splP94798ICH60_FRATH | 60 kDa chaperonin groL | E.AAPAMPGGGM+16GAGNK.K        | AAPAMPGGGMG   | 544 | 538 | 2.63  | 0.000 |
| splP94798ICH60_FRATH | 60 kDa chaperonin groL | E.AAPAMPGGGM+16GAGNKKE.N      | AAPAMPGGGMG   | 544 | 538 | 2.415 | 0.000 |
| splP94798ICH60_FRATH | 60 kDa chaperonin groL | E.AAPAM+16PMGGGMGAGNK.K       | AAPAMPGGGMG   | 544 | 538 | 2.19  | 0.009 |
| splP94798ICH60_FRATH | 60 kDa chaperonin groL | E.AAPAM+16PMGGGMGAGNKKE.E     | AAPAMPGGGMG   | 544 | 538 | 2.049 | 0.003 |
| splP94798ICH60_FRATH | 60 kDa chaperonin groL | *.EAAPAMPGGGMGAGNKKE.E        | EAAPAMPGGGMG  | 544 | 538 | 4.027 | 0.000 |
| splP94798ICH60_FRATH | 60 kDa chaperonin groL | *.EAAPAM+16PMGGGMGAGNK.K      | EAAPAMPGGGMG  | 544 | 538 | 3.908 | 0.000 |
| splP94798ICH60_FRATH | 60 kDa chaperonin groL | *.EAAPAM+16PM+16GGGMGAGNK.K   | EAAPAMPGGGMG  | 544 | 538 | 3.57  | 0.000 |
| splP94798ICH60_FRATH | 60 kDa chaperonin groL | *.EAAPAMPGGGMGAGNK.K          | EAAPAMPGGGMG  | 544 | 538 | 3.56  | 0.000 |
| splP94798ICH60_FRATH | 60 kDa chaperonin groL | *.EAAPAMP+16GGGM+16GAGNK.K    | EAAPAMPGGGMG  | 544 | 538 | 2.499 | 0.002 |
| splP94798ICH60_FRATH | 60 kDa chaperonin groL | E.AAPAMPGGGMGGAGNKKE.N        | AAPAMPGGGMGG  | 544 | 539 | 4.527 | 0.004 |
| splP94798ICH60_FRATH | 60 kDa chaperonin groL | E.AAPAMPGGGMGGAGNKKE.E        | AAPAMPGGGMGG  | 544 | 539 | 4.346 | 0.000 |
| splP94798ICH60_FRATH | 60 kDa chaperonin groL | E.AAPAMPGGGMGGAGNK.K          | AAPAMPGGGMGG  | 544 | 539 | 4.208 | 0.000 |
| splP94798ICH60_FRATH | 60 kDa chaperonin groL | E.AAPAMPGGGM+16GGAGNKKE.N     | AAPAMPGGGMGG  | 544 | 539 | 4.148 | 0.000 |
| splP94798ICH60_FRATH | 60 kDa chaperonin groL | E.AAPAM+16PM+16GGGMGGAGNK.K   | AAPAMPGGGMGG  | 544 | 539 | 3.946 | 0.000 |
| splP94798ICH60_FRATH | 60 kDa chaperonin groL | E.AAPAMPGGGM+16GGAGNK.K       | AAPAMPGGGMGG  | 544 | 539 | 3.694 | 0.000 |
| splP94798ICH60_FRATH | 60 kDa chaperonin groL | E.AAPAM+16PMGGGM+16GGAGNK.K   | AAPAMPGGGMGG  | 544 | 539 | 3.663 | 0.000 |
| splP94798ICH60_FRATH | 60 kDa chaperonin groL | E.AAPAM+16PMGGGMGGAGNK.K      | AAPAMPGGGMGG  | 544 | 539 | 3.623 | 0.000 |
| splP94798ICH60_FRATH | 60 kDa chaperonin groL | E.AAPAM+16PMGGGMGGAGNKKE.E    | AAPAMPGGGMGG  | 544 | 539 | 2.793 | 0.000 |
| splP94798ICH60_FRATH | 60 kDa chaperonin groL | E.AAPAMP+16GGGMGGAGNK.K       | AAPAMPGGGMGG  | 544 | 539 | 2.707 | 0.000 |
| splP94798ICH60_FRATH | 60 kDa chaperonin groL | E.AAPAMPGGGM+16GGAGNKKE.E     | AAPAMPGGGMGG  | 544 | 539 | 2.704 | 0.000 |
| splP94798ICH60_FRATH | 60 kDa chaperonin groL | E.AAPAMP+16GGGM+16GGAGNK.K    | AAPAMPGGGMGG  | 544 | 539 | 2.349 | 0.000 |
| splP94798ICH60_FRATH | 60 kDa chaperonin groL | E.AAPAM+16PMGGGM+16GGAGNKKE.N | AAPAMPGGGMGG  | 544 | 539 | 2.238 | 0.001 |
| splP94798ICH60_FRATH | 60 kDa chaperonin groL | *.EAAPAMPGGGMGGAGNKKE.E       | EAAPAMPGGGMGG | 544 | 539 | 4.386 | 0.000 |
| splP94798ICH60_FRATH | 60 kDa chaperonin groL | *.EAAPAMP+16GGGMGGAGNK.K      | EAAPAMPGGGMGG | 544 | 539 | 4.003 | 0.000 |
| splP94798ICH60_FRATH | 60 kDa chaperonin groL | *.EAAPAM+16PM+16GGGMGGAGNK.K  | EAAPAMPGGGMGG | 544 | 539 | 3.901 | 0.000 |
| splP94798ICH60_FRATH | 60 kDa chaperonin groL | *.EAAPAMP+16GGGM+16GGAGNK.K   | EAAPAMPGGGMGG | 544 | 539 | 3.829 | 0.000 |
| splP94798ICH60_FRATH | 60 kDa chaperonin groL | E.AAPAMPGGGMGGMAGNKKE.E       | AAPAMPGGGMGGM | 544 | 540 | 4.597 | 0.000 |
| splP94798ICH60_FRATH | 60 kDa chaperonin groL | E.AAPAMPGGGMGGMAGNKKE.N       | AAPAMPGGGMGGM | 544 | 540 | 4.571 | 0.000 |

**Table S2.** Junction peptides identified by MudPIT-LC-MS-MS analysis of *F. tularensis* tmRNA- tagged proteins.

|                      |                          |                               |                      |     |     |       |       |
|----------------------|--------------------------|-------------------------------|----------------------|-----|-----|-------|-------|
| splP94798ICH60_FRATH | 60 kDa chaperonin groL   | E.AAPAMPMGGGM+16GGMAGNKK.E    | AAPAMPMGGGMGGM       | 544 | 540 | 3.898 | 0.000 |
| splP94798ICH60_FRATH | 60 kDa chaperonin groL   | E.AAPAMPMGGGMGGMAGNK.K        | AAPAMPMGGGMGGM       | 544 | 540 | 3.553 | 0.000 |
| splP94798ICH60_FRATH | 60 kDa chaperonin groL   | E.AAPAMPMGGGMGGM+16AGNKKE.N   | AAPAMPMGGGMGGM       | 544 | 540 | 3.376 | 0.000 |
| splP94798ICH60_FRATH | 60 kDa chaperonin groL   | E.AAPAMPMGGGM+16GGMAGNKKKE.N  | AAPAMPMGGGMGGM       | 544 | 540 | 2.977 | 0.000 |
| splP94798ICH60_FRATH | 60 kDa chaperonin groL   | E.AAPAMPMGGGM+16GGMAGNK.K     | AAPAMPMGGGMGGM       | 544 | 540 | 2.7   | 0.000 |
| splP94798ICH60_FRATH | 60 kDa chaperonin groL   | E.AAPAM+16PMGGGM+16GGMAGNK.K  | AAPAMPMGGGMGGM       | 544 | 540 | 2.213 | 0.000 |
| splP94798ICH60_FRATH | 60 kDa chaperonin groL   | *.EAAPAMPMGGGMGGMAGNK.K       | EAAPAMPMGGGMGGM      | 544 | 540 | 4.316 | 0.000 |
| splP94798ICH60_FRATH | 60 kDa chaperonin groL   | *.EAAPAM+16PMGGGM+16GGMAGNK.K | EAAPAMPMGGGMGGM      | 544 | 540 | 2.749 | 0.000 |
| splP94798ICH60_FRATH | 60 kDa chaperonin groL   | E.AAPAMPMGGGMGGMPAGNKK.E      | AAPAMPMGGGMGGMP      | 544 | 541 | 4.586 | 0.000 |
| splP94798ICH60_FRATH | 60 kDa chaperonin groL   | E.AAPAMPMGGGMGGMPAGNKKKE.N    | AAPAMPMGGGMGGMP      | 544 | 541 | 4.377 | 0.000 |
| splP94798ICH60_FRATH | 60 kDa chaperonin groL   | E.AAPAMPMGGGMGGMPAGNK.K       | AAPAMPMGGGMGGMP      | 544 | 541 | 4.297 | 0.000 |
| splP94798ICH60_FRATH | 60 kDa chaperonin groL   | E.AAPAMP+16GGGMGGMPAGNK.K     | AAPAMPMGGGMGGMP      | 544 | 541 | 3.181 | 0.000 |
| splP94798ICH60_FRATH | 60 kDa chaperonin groL   | E.AAPAM+16PMGGGMGGMPAGNKK.E   | AAPAMPMGGGMGGMP      | 544 | 541 | 2.678 | 0.000 |
| splP94798ICH60_FRATH | 60 kDa chaperonin groL   | *.EAAPAMPMGGGMGGMPAGNKK.E     | EAAPAMPMGGGMGGMP     | 544 | 541 | 4.564 | 0.000 |
| splP94798ICH60_FRATH | 60 kDa chaperonin groL   | *.EAAPAMPMGGGMGGMPAGNK.K      | EAAPAMPMGGGMGGMP     | 544 | 541 | 3.383 | 0.000 |
| splP94798ICH60_FRATH | 60 kDa chaperonin groL   | *.EAAPAMPMGGGM+16GGMPAGNKK.E  | EAAPAMPMGGGMGGMP     | 544 | 541 | 3.163 | 0.000 |
| splP94798ICH60_FRATH | 60 kDa chaperonin groL   | *.EAAPAMPMGGGMGGM+16PAGNKK.E  | EAAPAMPMGGGMGGMP     | 544 | 541 | 2.925 | 0.000 |
| splP94798ICH60_FRATH | 60 kDa chaperonin groL   | *.EAAPAMPMGGGM+16GGMPAGNK.K   | EAAPAMPMGGGMGGMP     | 544 | 541 | 2.886 | 0.000 |
| splP94798ICH60_FRATH | 60 kDa chaperonin groL   | E.AAPAMPMGGGMGGMPGAGNKK.E     | AAPAMPMGGGMGGMPG     | 544 | 542 | 4.131 | 0.000 |
| splP94798ICH60_FRATH | 60 kDa chaperonin groL   | *.EAAPAMPMGGGMGGMPGAGNK.K     | EAAPAMPMGGGMGGMPG    | 544 | 542 | 4.525 | 0.000 |
| splP94798ICH60_FRATH | 60 kDa chaperonin groL   | *.EAAPAMPMGGGM+16GGMPGAGNK.K  | EAAPAMPMGGGMGGMPG    | 544 | 542 | 3.26  | 0.000 |
| splQ2A1K3IACON_FRATH | Aconitate hydratase acn  | K.AFAEALVHEQGLHGFLTDEQAGNK.K  | AFAEALVHEQGLHGFLTDEQ | 937 | 412 | 3.539 | 0.002 |
| splQ2A1K3IACON_FRATH | Aconitate hydratase acn  | E.IAAIQSHVAGNK.K              | IAAIQSHV             | 937 | 605 | 4.165 | 0.000 |
| splQ2A1K3IACON_FRATH | Aconitate hydratase acn  | E.IAAIQSHVIAGNK.K             | IAAIQSHVI            | 937 | 606 | 4.222 | 0.000 |
| splQ2A1K3IACON_FRATH | Aconitate hydratase acn  | E.IAAIQSHVIAGNKKKE.N          | IAAIQSHVI            | 937 | 606 | 3.407 | 0.000 |
| splQ2A1K3IACON_FRATH | Aconitate hydratase acn  | E.IAAIQSHVINAGNK.K            | IAAIQSHVIN           | 937 | 607 | 4.061 | 0.000 |
| splQ2A1K3IACON_FRATH | Aconitate hydratase acn  | E.IAAIQSHVINSAGNK.K           | IAAIQSHVINS          | 937 | 608 | 4.375 | 0.000 |
| splQ2A1K3IACON_FRATH | Aconitate hydratase acn  | E.IAAIQSHVINSAGNKKKE.N        | IAAIQSHVINS          | 937 | 608 | 3.388 | 0.000 |
| splQ2A1K3IACON_FRATH | Aconitate hydratase acn  | E.IAAIQSHVINSDAGNK.K          | IAAIQSHVINS          | 937 | 609 | 4.339 | 0.000 |
| splQ2A1K3IACON_FRATH | Aconitate hydratase acn  | E.IAAIQSHVINSDAGNKKKE.N       | IAAIQSHVINS          | 937 | 609 | 3.123 | 0.000 |
| splQ2A1M0IEFTU_FRATH | Elongation factor Tu tuf | R.KFDEIDSAAGNKK.E             | KFDEIDSA             | 394 | 53  | 3.636 | 0.008 |
| splQ2A1M0IEFTU_FRATH | Elongation factor Tu tuf | R.KFDEIDSAPEEAGNK.K           | KFDEIDSAPEE          | 394 | 56  | 2.885 | 0.002 |
| splQ2A1M0IEFTU_FRATH | Elongation factor Tu tuf | E.IDSAPEEKARGITINTSAGNKKKE.N  | IDSAPEEKARGITINTS    | 394 | 66  | 2.499 | 0.000 |

**Table S2.** Junction peptides identified by MudPIT-LC-MS-MS analysis of *F. tularensis* tmRNA- tagged proteins.

|                      |                          |                                       |                            |     |     |       |       |
|----------------------|--------------------------|---------------------------------------|----------------------------|-----|-----|-------|-------|
| splQ2A1M0IEFTU_FRATH | Elongation factor Tu tuf | R.GITINTSHAGNK.K                      | GITINTSH                   | 394 | 67  | 3.017 | 0.000 |
| splQ2A1M0IEFTU_FRATH | Elongation factor Tu tuf | R.GITINTSHVAGNK.K                     | GITINTSHV                  | 394 | 68  | 4.062 | 0.000 |
| splQ2A1M0IEFTU_FRATH | Elongation factor Tu tuf | R.GITINTSHVAGNKK.E                    | GITINTSHV                  | 394 | 68  | 2.985 | 0.002 |
| splQ2A1M0IEFTU_FRATH | Elongation factor Tu tuf | R.HYAHVDC+57PGHADAGNKK.E              | HYAHVDCPGHAD               | 394 | 87  | 3.035 | 0.000 |
| splQ2A1M0IEFTU_FRATH | Elongation factor Tu tuf | K.IVELVQAAGNKK.E                      | IVELVQA                    | 394 | 195 | 4.019 | 0.001 |
| splQ2A1M0IEFTU_FRATH | Elongation factor Tu tuf | K.IVELVQAMDDYIAGNKK.E                 | IVELVQAMDDYI               | 394 | 200 | 3.202 | 0.002 |
| splQ2A1M0IEFTU_FRATH | Elongation factor Tu tuf | K.IVELVQAMDDYIPAGNKK.E                | IVELVQAMDDYIP              | 394 | 201 | 4.26  | 0.000 |
| splQ2A1M0IEFTU_FRATH | Elongation factor Tu tuf | E.LVQAMDDYIPAGNKK.E.N                 | LVQAMDDYIP                 | 394 | 201 | 4.164 | 0.000 |
| splQ2A1M0IEFTU_FRATH | Elongation factor Tu tuf | K.IVELVQAMDDYIPAPAGNK.K               | IVELVQAMDDYIPAP            | 394 | 203 | 4.352 | 0.000 |
| splQ2A1M0IEFTU_FRATH | Elongation factor Tu tuf | E.LVQAMDDYIPAPAGNK.K                  | LVQAMDDYIPAP               | 394 | 203 | 4.076 | 0.000 |
| splQ2A1M0IEFTU_FRATH | Elongation factor Tu tuf | E.LVQAMDDYIPAPAGNKKENR.V              | LVQAMDDYIPAP               | 394 | 203 | 2.94  | 0.007 |
| splQ2A1M0IEFTU_FRATH | Elongation factor Tu tuf | E.LVQAM+16DDYIPAPAGNK.K               | LVQAMDDYIPAP               | 394 | 203 | 2.403 | 0.000 |
| splQ2A1M0IEFTU_FRATH | Elongation factor Tu tuf | E.LVQAMDDYIPAPERDTEKAGNKKENR.V        | LVQAMDDYIPAPERDTEK         | 394 | 209 | 3.577 | 0.000 |
| splQ2A1M0IEFTU_FRATH | Elongation factor Tu tuf | E.LVQAMDDYIPAPERDTEKAGNKK.E.N         | LVQAMDDYIPAPERDTEK         | 394 | 209 | 2.667 | 0.001 |
| splQ2A1M0IEFTU_FRATH | Elongation factor Tu tuf | E.LVQAMDDYIPAPERDTEKPAGNKK.E.N        | LVQAMDDYIPAPERDTEKP        | 394 | 210 | 2.429 | 0.000 |
| splQ2A1M0IEFTU_FRATH | Elongation factor Tu tuf | E.LVQAMDDYIPAPERDTEKPFAGNKK.E         | LVQAMDDYIPAPERDTEKPF       | 394 | 211 | 2.822 | 0.000 |
| splQ2A1M0IEFTU_FRATH | Elongation factor Tu tuf | E.LVQAMDDYIPAPERDTEKPFAGNKK.E.N       | LVQAMDDYIPAPERDTEKPF       | 394 | 211 | 2.68  | 0.000 |
| splQ2A1M0IEFTU_FRATH | Elongation factor Tu tuf | R.DTEKPFAGNKK.E                       | DTEKPF                     | 394 | 212 | 3.946 | 0.000 |
| splQ2A1M0IEFTU_FRATH | Elongation factor Tu tuf | E.LVQAMDDYIPAPERDTEKPFAGNKK.E         | LVQAMDDYIPAPERDTEKPF       | 394 | 212 | 3.343 | 0.000 |
| splQ2A1M0IEFTU_FRATH | Elongation factor Tu tuf | E.RDTEKPFAGNKK.E.N                    | RDTEKPF                    | 394 | 212 | 4.16  | 0.001 |
| splQ2A1M0IEFTU_FRATH | Elongation factor Tu tuf | E.RDTEKPFAGNK.K                       | RDTEKPF                    | 394 | 212 | 3.637 | 0.001 |
| splQ2A1M0IEFTU_FRATH | Elongation factor Tu tuf | R.DTEKPFILAGNK.K                      | DTEKPFIL                   | 394 | 213 | 4.103 | 0.000 |
| splQ2A1M0IEFTU_FRATH | Elongation factor Tu tuf | R.DTEKPFILAGNKK.E                     | DTEKPFIL                   | 394 | 213 | 4.094 | 0.000 |
| splQ2A1M0IEFTU_FRATH | Elongation factor Tu tuf | K.IVELVQAMDDYIPAPERDTEKPFILAGNKK.E    | IVELVQAMDDYIPAPERDTEKPFIL  | 394 | 213 | 2.934 | 0.000 |
| splQ2A1M0IEFTU_FRATH | Elongation factor Tu tuf | E.LVQAMDDYIPAPERDTEKPFILAGNKK.E       | LVQAMDDYIPAPERDTEKPFIL     | 394 | 213 | 2.886 | 0.000 |
| splQ2A1M0IEFTU_FRATH | Elongation factor Tu tuf | E.RDTEKPFILAGNK.K                     | RDTEKPFIL                  | 394 | 213 | 3.97  | 0.000 |
| splQ2A1M0IEFTU_FRATH | Elongation factor Tu tuf | E.RDTEKPFILAGNKK.E.N                  | RDTEKPFIL                  | 394 | 213 | 3.949 | 0.000 |
| splQ2A1M0IEFTU_FRATH | Elongation factor Tu tuf | R.DTEKPFILPAGNKK.E                    | DTEKPFILP                  | 394 | 214 | 4.303 | 0.000 |
| splQ2A1M0IEFTU_FRATH | Elongation factor Tu tuf | R.DTEKPFILPAGNK.K                     | DTEKPFILP                  | 394 | 214 | 3.299 | 0.000 |
| splQ2A1M0IEFTU_FRATH | Elongation factor Tu tuf | E.RDTEKPFILPAGNK.K                    | RDTEKPFILP                 | 394 | 214 | 3.803 | 0.000 |
| splQ2A1M0IEFTU_FRATH | Elongation factor Tu tuf | R.DTEKPFILPIAGNK.K                    | DTEKPFILPI                 | 394 | 215 | 4.267 | 0.000 |
| splQ2A1M0IEFTU_FRATH | Elongation factor Tu tuf | R.DTEKPFILPIEDAGNKK.E                 | DTEKPFILPIED               | 394 | 217 | 3.306 | 0.003 |
| splQ2A1M0IEFTU_FRATH | Elongation factor Tu tuf | E.LVQAMDDYIPAPERDTEKPFILPIEDAGNKK.E.N | LVQAMDDYIPAPERDTEKPFILPIED | 394 | 217 | 2.37  | 0.000 |



**Table S2.** Junction peptides identified by MudPIT-LC-MS-MS analysis of *F. tularensis* tmRNA- tagged proteins.

|                      |                          |                                         |                              |     |     |       |       |
|----------------------|--------------------------|-----------------------------------------|------------------------------|-----|-----|-------|-------|
| splQ2A1M0IEFTU_FRATH | Elongation factor Tu tuf | R.DTEKPFILPIEDVAGNKK.E                  | DTEKPFILPIEDV                | 394 | 218 | 4.36  | 0.000 |
| splQ2A1M0IEFTU_FRATH | Elongation factor Tu tuf | E.LVQAMDDYIPAPERDTEKPFILPIEDVAGNKK.E.N  | LVQAMDDYIPAPERDTEKPFILPIEDV  | 394 | 218 | 3.696 | 0.000 |
| splQ2A1M0IEFTU_FRATH | Elongation factor Tu tuf | E.RDTEKPFILPIEDVAGNKK.E.N               | RDTEKPFILPIEDV               | 394 | 218 | 3.051 | 0.000 |
| splQ2A1M0IEFTU_FRATH | Elongation factor Tu tuf | R.DTEKPFILPIEDVFAGNKK.E                 | DTEKPFILPIEDVF               | 394 | 219 | 4.295 | 0.000 |
| splQ2A1M0IEFTU_FRATH | Elongation factor Tu tuf | R.DTEKPFILPIEDVFAGNK.K                  | DTEKPFILPIEDVF               | 394 | 219 | 4.196 | 0.000 |
| splQ2A1M0IEFTU_FRATH | Elongation factor Tu tuf | E.LVQAMDDYIPAPERDTEKPFILPIEDVFAGNKK.E.N | LVQAMDDYIPAPERDTEKPFILPIEDVF | 394 | 219 | 3.454 | 0.000 |
| splQ2A1M0IEFTU_FRATH | Elongation factor Tu tuf | E.RDTEKPFILPIEDVFAGNK.K                 | RDTEKPFILPIEDVF              | 394 | 219 | 3.421 | 0.000 |
| splQ2A1M0IEFTU_FRATH | Elongation factor Tu tuf | R.DTEKPFILPIEDVFSAGNKK.E                | DTEKPFILPIEDVFS              | 394 | 220 | 3.831 | 0.000 |
| splQ2A1M0IEFTU_FRATH | Elongation factor Tu tuf | R.DTEKPFILPIEDVFSIAGNK.K                | DTEKPFILPIEDVFSI             | 394 | 221 | 4.523 | 0.000 |
| splQ2A1M0IEFTU_FRATH | Elongation factor Tu tuf | R.DTEKPFILPIEDVFSIAGNKK.E               | DTEKPFILPIEDVFSI             | 394 | 221 | 4.403 | 0.000 |
| splQ2A1M0IEFTU_FRATH | Elongation factor Tu tuf | R.DTEKPFILPIEDVFSISAGNKK.E              | DTEKPFILPIEDVFSIS            | 394 | 222 | 3.081 | 0.000 |
| splQ2A1M0IEFTU_FRATH | Elongation factor Tu tuf | R.DTEKPFILPIEDVFSISAGNK.K               | DTEKPFILPIEDVFSIS            | 394 | 222 | 2.68  | 0.001 |
| splQ2A1M0IEFTU_FRATH | Elongation factor Tu tuf | R.DTEKPFILPIEDVFSISAGNKK.E              | DTEKPFILPIEDVFSISG           | 394 | 223 | 3.523 | 0.000 |
| splQ2A1M0IEFTU_FRATH | Elongation factor Tu tuf | R.DTEKPFILPIEDVFSISAGNK.K               | DTEKPFILPIEDVFSISG           | 394 | 223 | 3.272 | 0.000 |
| splQ2A1M0IEFTU_FRATH | Elongation factor Tu tuf | E.RGVVNVGDEAGNKK.E                      | RGVVNVGDE                    | 394 | 242 | 3.257 | 0.008 |
| splQ2A1M0IEFTU_FRATH | Elongation factor Tu tuf | R.GVVNVGDEVAGNKK.E                      | GVVNVGDEV                    | 394 | 243 | 4.127 | 0.003 |
| splQ2A1M0IEFTU_FRATH | Elongation factor Tu tuf | *.RGVVNVGDEVAGNKK.E.N                   | RGVVNVGDEV                   | 394 | 243 | 4.11  | 0.000 |
| splQ2A1M0IEFTU_FRATH | Elongation factor Tu tuf | R.GVVNVGDEVEVVGAGNKK.E                  | GVVNVGDEVEVVG                | 394 | 247 | 3.474 | 0.000 |
| splQ2A1M0IEFTU_FRATH | Elongation factor Tu tuf | E.VVGIRPTAGNK.K                         | VVGIRPT                      | 394 | 251 | 3.508 | 0.004 |
| splQ2A1M0IEFTU_FRATH | Elongation factor Tu tuf | E.VVGIRPTQAGNK.K                        | VVGIRPTQ                     | 394 | 252 | 3.946 | 0.008 |
| splQ2A1M0IEFTU_FRATH | Elongation factor Tu tuf | R.KLLDRGEAGAGNKK.E                      | KLLDRGEAG                    | 394 | 272 | 3.834 | 0.003 |
| splQ2A1M0IEFTU_FRATH | Elongation factor Tu tuf | K.LLDRGEAGAGNKK.E                       | LLDRGEAG                     | 394 | 272 | 3.347 | 0.003 |
| splQ2A1M0IEFTU_FRATH | Elongation factor Tu tuf | R.KLLDRGEAGDAGNKK.E                     | KLLDRGEAGD                   | 394 | 273 | 3.957 | 0.000 |
| splQ2A1M0IEFTU_FRATH | Elongation factor Tu tuf | R.KLLDRGEAGDNVGIAGNKK.E                 | KLLDRGEAGDNVGI               | 394 | 277 | 3.159 | 0.000 |
| splQ2A1M0IEFTU_FRATH | Elongation factor Tu tuf | R.GQVLC+57KPGAGNKK.E                    | GQVLCKP                      | 394 | 296 | 3.243 | 0.000 |
| splQ2A1M0IEFTU_FRATH | Elongation factor Tu tuf | R.GQVLC+57KPGAGNK.K                     | GQVLCKPG                     | 394 | 297 | 3.336 | 0.000 |
| splQ2A1M0IEFTU_FRATH | Elongation factor Tu tuf | R.GQVLC+57KPGSAGNK.K                    | GQVLCKPGS                    | 394 | 298 | 3.681 | 0.000 |
| splQ2A1M0IEFTU_FRATH | Elongation factor Tu tuf | R.GQVLC+57KPGSAGNKK.E                   | GQVLCKPGS                    | 394 | 298 | 3.243 | 0.001 |
| splQ2A1M0IEFTU_FRATH | Elongation factor Tu tuf | R.GQVLC+57KPGSIAGNKK.E                  | GQVLCKPGSI                   | 394 | 299 | 3.555 | 0.003 |
| splQ2A1M0IEFTU_FRATH | Elongation factor Tu tuf | R.GQVLC+57KPGSIAGNK.K                   | GQVLCKPGSI                   | 394 | 299 | 2.917 | 0.006 |
| splQ2A1M3IRL11_FRATH | 50S ribosomal protein L1 | E.MKTPPASAGNKK.E.N                      | MKTPPAS                      | 144 | 78  | 2.081 | 0.001 |
| splQ2A1M3IRL11_FRATH | 50S ribosomal protein L1 | E.MKTPPASAGNKK.E.N                      | MKTPPAS                      | 144 | 79  | 3.919 | 0.000 |
| splQ2A1M3IRL11_FRATH | 50S ribosomal protein L1 | E.M+16KTPPASAGNKK.E.N                   | MKTPPAS                      | 144 | 79  | 3.35  | 0.001 |

**Table S2.** Junction peptides identified by MudPIT-LC-MS-MS analysis of *F. tularensis* tmRNA- tagged proteins.

|                      |                                                    |                  |     |     |       |       |
|----------------------|----------------------------------------------------|------------------|-----|-----|-------|-------|
| splQ2A1M3IRL11_FRATH | 50S ribosomal protein L1 K.TPPASYAGNKK.E           | TPPASY           | 144 | 79  | 3.766 | 0.003 |
| splQ2A1M3IRL11_FRATH | 50S ribosomal protein L1 K.TPPASYLAGNK.K           | TPPASYL          | 144 | 80  | 3.582 | 0.000 |
| splQ2A1M3IRL11_FRATH | 50S ribosomal protein L1 K.TPPASYLAGNKK.E          | TPPASYL          | 144 | 80  | 2.012 | 0.001 |
| splQ2A1M3IRL11_FRATH | 50S ribosomal protein L1 E.IAKVKDPAGNKK.E.N        | IAKVKDP          | 144 | 116 | 2.149 | 0.000 |
| splQ2A1M3IRL11_FRATH | 50S ribosomal protein L1 E.IAKVKDPDLAGNKK.E.N      | IAKVKDPDL        | 144 | 118 | 3.565 | 0.000 |
| splQ2A1M3IRL11_FRATH | 50S ribosomal protein L1 E.IAKVKDPDLTAAAGNKK.E.N   | IAKVKDPDLTAA     | 144 | 121 | 3.485 | 0.000 |
| splQ2A1M3IRL11_FRATH | 50S ribosomal protein L1 E.IAKVKDPDLTAADAGNKK.E.N  | IAKVKDPDLTAAD    | 144 | 122 | 2.94  | 0.003 |
| splQ2A1M4IRL1_FRATH  | 50S ribosomal protein L1 D.FDVVAGNKK.E.N           | FDVV             | 232 | 115 | 4.055 | 0.001 |
| splQ2A1M5IRL10_FRATH | 50S ribosomal protein L1 E.ALATLLNAGNKK.E.N        | ALATLLN          | 172 | 141 | 3.834 | 0.001 |
| splQ2A1M5IRL10_FRATH | 50S ribosomal protein L1 E.ALATLLNIMQAAGNKK.E.N    | ALATLLNIMQA      | 172 | 145 | 4.296 | 0.000 |
| splQ2A1M5IRL10_FRATH | 50S ribosomal protein L1 E.ALATLLNIMQAAGNK.K       | ALATLLNIMQA      | 172 | 145 | 2.422 | 0.001 |
| splQ2A1M5IRL10_FRATH | 50S ribosomal protein L1 R.EEALATLLNIMQAPVTAGNKK.E | EEALATLLNIMQAPVT | 172 | 148 | 2.596 | 0.001 |
| splQ2A1M5IRL10_FRATH | 50S ribosomal protein L1 R.TLNEIPSQAGNKK.E         | TLNEIPSQ         | 172 | 160 | 4.016 | 0.000 |
| splQ2A1M5IRL10_FRATH | 50S ribosomal protein L1 R.TLNEIPSQAAGNKK.E        | TLNEIPSQA        | 172 | 161 | 3.555 | 0.002 |
| splQ2A1M5IRL10_FRATH | 50S ribosomal protein L1 R.TLNEIPSQAAGNK.K         | TLNEIPSQA        | 172 | 161 | 3.474 | 0.008 |
| splQ2A1M5IRL10_FRATH | 50S ribosomal protein L1 E.IPSQAVAGNKK.E.N         | IPSQAV           | 172 | 162 | 3.975 | 0.009 |
| splQ2A1M5IRL10_FRATH | 50S ribosomal protein L1 R.TLNEIPSQAVAGNKK.E       | TLNEIPSQAV       | 172 | 162 | 4.302 | 0.000 |
| splQ2A1M5IRL10_FRATH | 50S ribosomal protein L1 R.TLNEIPSQAVAGNK.K        | TLNEIPSQAV       | 172 | 162 | 4.165 | 0.000 |
| splQ2A1M5IRL10_FRATH | 50S ribosomal protein L1 R.VFAAVGDAGNKK.E          | VFAAVGD          | 172 | 170 | 3.902 | 0.004 |
| splQ2A1M5IRL10_FRATH | 50S ribosomal protein L1 R.VFAAVGDSKAGNK.K         | VFAAVGDSK        | 172 | 172 | 3.418 | 0.000 |
| splQ2A1M6IRL7_FRATH  | 50S ribosomal protein L7 E.DKFGVSAAGNKK.E.N        | DKFGVSA          | 125 | 35  | 4.247 | 0.000 |
| splQ2A1M6IRL7_FRATH  | 50S ribosomal protein L7 K.FGVSAAGNK.K             | FGVSA            | 125 | 35  | 2.912 | 0.009 |
| splQ2A1M6IRL7_FRATH  | 50S ribosomal protein L7 E.DKFGVSAAGNKK.E.N        | DKFGVSAAGNKK.E.N | 125 | 37  | 4.313 | 0.001 |
| splQ2A1M6IRL7_FRATH  | 50S ribosomal protein L7 K.FGVSAAGNKK.E            | FGVSAAGNKK.E     | 125 | 37  | 4.11  | 0.002 |
| splQ2A1M6IRL7_FRATH  | 50S ribosomal protein L7 K.FGVSAAGNKK.E            | FGVSAAGNKK.E     | 125 | 37  | 3.416 | 0.000 |
| splQ2A1M6IRL7_FRATH  | 50S ribosomal protein L7 E.DKFGVSAAGNKK.E.N        | DKFGVSAAGNKK.E.N | 125 | 38  | 4.398 | 0.000 |
| splQ2A1M6IRL7_FRATH  | 50S ribosomal protein L7 K.FGVSAAGNKK.E            | FGVSAAGNKK.E     | 125 | 38  | 3.938 | 0.005 |
| splQ2A1M6IRL7_FRATH  | 50S ribosomal protein L7 K.FGVSAAGNKK.E            | FGVSAAGNKK.E     | 125 | 38  | 3.581 | 0.000 |
| splQ2A1M6IRL7_FRATH  | 50S ribosomal protein L7 *.DKFGVSAAGNKK.E.N        | DKFGVSAAGNKK.E.N | 125 | 39  | 4.08  | 0.006 |
| splQ2A1M6IRL7_FRATH  | 50S ribosomal protein L7 K.FGVSAAGNKK.E            | FGVSAAGNKK.E     | 125 | 39  | 4.43  | 0.004 |
| splQ2A1M6IRL7_FRATH  | 50S ribosomal protein L7 K.FGVSAAGNKK.E            | FGVSAAGNKK.E     | 125 | 39  | 4.386 | 0.001 |
| splQ2A1M6IRL7_FRATH  | 50S ribosomal protein L7 D.KFGVSAAGNKK.E           | KFGVSAAGNKK.E    | 125 | 39  | 3.363 | 0.001 |
| splQ2A1M6IRL7_FRATH  | 50S ribosomal protein L7 E.DKFGVSAAGNKK.E.N        | DKFGVSAAGNKK.E.N | 125 | 40  | 4.076 | 0.000 |

**Table S2.** Junction peptides identified by MudPIT-LC-MS-MS analysis of *F. tularensis* tmRNA- tagged proteins.

|                      |                                                          |                     |      |     |       |       |
|----------------------|----------------------------------------------------------|---------------------|------|-----|-------|-------|
| splQ2A1M6IRL7_FRATH  | 50S ribosomal protein L7. K.FGVSAAAAVAAGNKK.E            | FGVSAAAAVA          | 125  | 40  | 4.458 | 0.000 |
| splQ2A1M6IRL7_FRATH  | 50S ribosomal protein L7. K.FGVSAAAAVAAGNK.K             | FGVSAAAAVA          | 125  | 40  | 4.397 | 0.000 |
| splQ2A1M6IRL7_FRATH  | 50S ribosomal protein L7. E.DKFGVSAAAAVAVAGNKK.E.N       | DKFGVSAAAAVAV       | 125  | 41  | 4.262 | 0.000 |
| splQ2A1M6IRL7_FRATH  | 50S ribosomal protein L7. K.FGVSAAAAVAVAGNK.K            | FGVSAAAAVAV         | 125  | 41  | 4.465 | 0.000 |
| splQ2A1M6IRL7_FRATH  | 50S ribosomal protein L7. K.FGVSAAAAVAVAGNKK.E           | FGVSAAAAVAV         | 125  | 41  | 4.423 | 0.000 |
| splQ2A1M6IRL7_FRATH  | 50S ribosomal protein L7. K.MMEDKFGVSAAAAVAVAGNKK.E      | MMEDKFGVSAAAAVAV    | 125  | 41  | 3.226 | 0.000 |
| splQ2A1M6IRL7_FRATH  | 50S ribosomal protein L7. E.DKFGVSAAAAVAVAAAGNKK.E.N     | DKFGVSAAAAVAVAA     | 125  | 43  | 4.196 | 0.000 |
| splQ2A1M6IRL7_FRATH  | 50S ribosomal protein L7. K.FGVSAAAAVAVAAAGNK.K          | FGVSAAAAVAVAA       | 125  | 43  | 2.708 | 0.000 |
| splQ2A1M6IRL7_FRATH  | 50S ribosomal protein L7. E.FDVVLVDAAGNKK.E.N            | FDVVLVDA            | 125  | 66  | 3.981 | 0.000 |
| splQ2A1M6IRL7_FRATH  | 50S ribosomal protein L7. E.FDVVLVDAGAGNKK.E.N           | FDVVLVDAG           | 125  | 67  | 2.513 | 0.001 |
| splQ2A1M6IRL7_FRATH  | 50S ribosomal protein L7. E.FDVVLVDAGSNKAGNKK.E.N        | FDVVLVDAGSNK        | 125  | 70  | 4.338 | 0.000 |
| splQ2A1M6IRL7_FRATH  | 50S ribosomal protein L7. E.FDVVLVDAGSNKIAGNKK.E.N       | FDVVLVDAGSNKI       | 125  | 71  | 4.27  | 0.000 |
| splQ2A1M6IRL7_FRATH  | 50S ribosomal protein L7. E.FDVVLVDAGSNKIAAGNKK.E.N      | FDVVLVDAGSNKIA      | 125  | 72  | 4.373 | 0.000 |
| splQ2A1M6IRL7_FRATH  | 50S ribosomal protein L7. E.FDVVLVDAGSNKIAAAGNKK.E.N     | FDVVLVDAGSNKIAA     | 125  | 73  | 4.417 | 0.000 |
| splQ2A1M6IRL7_FRATH  | 50S ribosomal protein L7. D.VVLVDAGSNKIAAAGNKK.E.N       | VVLVDAGSNKIAA       | 125  | 73  | 3.422 | 0.000 |
| splQ2A1M6IRL7_FRATH  | 50S ribosomal protein L7. E.FDVVLVDAGSNKIAIAGNKK.E.N     | FDVVLVDAGSNKIAAI    | 125  | 74  | 4.353 | 0.009 |
| splQ2A1M6IRL7_FRATH  | 50S ribosomal protein L7. D.VVLVDAGSNKIAIAGNKK.E.N       | VVLVDAGSNKIAAI      | 125  | 74  | 3.202 | 0.000 |
| splQ2A1M6IRL7_FRATH  | 50S ribosomal protein L7. E.FDVVLVDAGSNKIAAIKAGNKK.E.N   | FDVVLVDAGSNKIAAIK   | 125  | 75  | 3.567 | 0.002 |
| splQ2A1M6IRL7_FRATH  | 50S ribosomal protein L7. E.FDVVLVDAGSNKIAAIKAGNK.K      | FDVVLVDAGSNKIAAIKA  | 125  | 76  | 3.519 | 0.000 |
| splQ2A1M6IRL7_FRATH  | 50S ribosomal protein L7. E.FDVVLVDAGSNKIAAIKAGNKK.E.N   | FDVVLVDAGSNKIAAIKA  | 125  | 76  | 2.705 | 0.001 |
| splQ2A1M6IRL7_FRATH  | 50S ribosomal protein L7. E.FDVVLVDAGSNKIAAIKAVAGNKK.E.N | FDVVLVDAGSNKIAAIKAV | 125  | 77  | 3.568 | 0.000 |
| splQ2A1M6IRL7_FRATH  | 50S ribosomal protein L7. R.GATGLGLAGNKK.E               | GATGLGL             | 125  | 85  | 3.621 | 0.005 |
| splQ2A1M6IRL7_FRATH  | 50S ribosomal protein L7. R.GATGLGLAGNKK.E.N             | GATGLGL             | 125  | 85  | 3.541 | 0.008 |
| splQ2A1M6IRL7_FRATH  | 50S ribosomal protein L7. E.AKDAVEGTAGNKK.E.N            | AKDAVEGT            | 125  | 95  | 3.738 | 0.000 |
| splQ2A1M6IRL7_FRATH  | 50S ribosomal protein L7. E.AKDAVEGTPAGNKK.E.N           | AKDAVEGTP           | 125  | 96  | 4.2   | 0.000 |
| splQ2A1M6IRL7_FRATH  | 50S ribosomal protein L7. E.AKDAVEGTPAGNK.E              | AKDAVEGTP           | 125  | 96  | 2.774 | 0.000 |
| splQ2A1M6IRL7_FRATH  | 50S ribosomal protein L7. K.DAVEGTPAGNKK.E               | DAVEGTP             | 125  | 96  | 3.345 | 0.006 |
| splQ2A1M6IRL7_FRATH  | 50S ribosomal protein L7. E.AKDAVEGTPFAGNKK.E.N          | AKDAVEGTPF          | 125  | 97  | 4.27  | 0.000 |
| splQ2A1M6IRL7_FRATH  | 50S ribosomal protein L7. K.DAVEGTPFAGNKK.E              | DAVEGTPF            | 125  | 97  | 3.944 | 0.000 |
| splQ2A1M6IRL7_FRATH  | 50S ribosomal protein L7. K.DAVEGTPFTVKAGNK.K            | DAVEGTPFTVK         | 125  | 100 | 4.156 | 0.000 |
| splQ2A1M6IRL7_FRATH  | 50S ribosomal protein L7. E.GTPFTVKAGNKK.E.N             | GTPFTVK             | 125  | 100 | 3.714 | 0.002 |
| splQ2A1M8IRPOC_FRATH | DNA-directed RNA polymerase E.KAIKRLRAGNKK.E             | KAIKRLR             | 1417 | 220 | 2.106 | 0.009 |
| splQ2A1R5ILOLA_FRATH | Outer-membrane lipoprotein D.IAQFPYLIAGNKK.E             | IAQFPYLI            | 205  | 111 | 3.26  | 0.000 |

**Table S2.** Junction peptides identified by MudPIT-LC-MS-MS analysis of *F. tularensis* tmRNA- tagged proteins.

|                      |                            |                                |                    |     |     |       |       |
|----------------------|----------------------------|--------------------------------|--------------------|-----|-----|-------|-------|
| splQ2A1R5ILOLA_FRATH | Outer-membrane lipoprot    | K.VSNDIAQFPYLIAGNKK.E          | VSNDIAQFPYLI       | 205 | 111 | 4.262 | 0.000 |
| splQ2A1R5ILOLA_FRATH | Outer-membrane lipoprot    | K.KVSNDIAQFPYLILAGNKK.E        | KVSNDIAQFPYLIL     | 205 | 112 | 3.391 | 0.000 |
| splQ2A1R5ILOLA_FRATH | Outer-membrane lipoprot    | K.VSNDIAQFPYLILAGNKK.E         | VSNDIAQFPYLIL      | 205 | 112 | 3.811 | 0.000 |
| splQ2A1R5ILOLA_FRATH | Outer-membrane lipoprot    | K.VSNDIAQFPYLILAGNKK.K         | VSNDIAQFPYLIL      | 205 | 112 | 3.619 | 0.000 |
| splQ2A1R5ILOLA_FRATH | Outer-membrane lipoprot    | D.IAQFPYLILLAGNKK.K            | IAQFPYLILL         | 205 | 113 | 3.719 | 0.000 |
| splQ2A1R5ILOLA_FRATH | Outer-membrane lipoprot    | K.VSNDIAQFPYLILLAGNKK.K        | VSNDIAQFPYLILL     | 205 | 113 | 4.573 | 0.000 |
| splQ2A1R5ILOLA_FRATH | Outer-membrane lipoprot    | K.VSNDIAQFPYLILLAGNKK.E        | VSNDIAQFPYLILL     | 205 | 113 | 4.477 | 0.000 |
| splQ2A1R5ILOLA_FRATH | Outer-membrane lipoprot    | K.VSNDIAQFPYLILLSAGNKK.K       | VSNDIAQFPYLILLS    | 205 | 114 | 4.357 | 0.000 |
| splQ2A1R5ILOLA_FRATH | Outer-membrane lipoprot    | E.FNNVKTDVDSINTSFAGNKK.E.N     | FNNVKTDVDSINTSF    | 205 | 188 | 3.099 | 0.006 |
| splQ2A1R5ILOLA_FRATH | Outer-membrane lipoprot    | K.APQNTDIIAGNKK.E              | APQNTDII           | 205 | 199 | 3.953 | 0.001 |
| splQ2A205IFETP_FRATH | Probable Fe(2+)-traffickir | K.FLFEGKEEKPAGNKK.E            | FLFEGKEEK          | 87  | 81  | 2.925 | 0.004 |
| splQ2A260IPDXS_FRATH | Pyridoxal biosynthesis Iya | R.AIVSAVTAGNKK.E               | AIVSAVT            | 287 | 253 | 4.299 | 0.000 |
| splQ2A260IPDXS_FRATH | Pyridoxal biosynthesis Iya | R.AIVSAVTAGNKK.E.N             | AIVSAVT            | 287 | 253 | 2.641 | 0.000 |
| splQ2A260IPDXS_FRATH | Pyridoxal biosynthesis Iya | R.AIVSAVTYAGNKK.E              | AIVSAVTY           | 287 | 254 | 4.425 | 0.000 |
| splQ2A260IPDXS_FRATH | Pyridoxal biosynthesis Iya | R.AIVSAVTYYNDAKAGNKK.K         | AIVSAVTYYNDAK      | 287 | 259 | 4.39  | 0.000 |
| splQ2A269IPNP_FRATH  | Polyribonucleotide nucleo  | K.TYAAGKIAGNKK.K               | TYAAGKI            | 693 | 72  | 2.834 | 0.008 |
| splQ2A278IENO_FRATH  | Enolase eno                | K.VQLVGDDLVFTNPSILAKAGNKK.E    | VQLVGDDLVFTNPSILAK | 456 | 326 | 2.929 | 0.003 |
| splQ2A298IKATG_FRATH | Catalase-peroxidase katG   | R.NLNKLDSPAGNKK.E              | NLNKLDSP           | 741 | 51  | 3.865 | 0.000 |
| splQ2A298IKATG_FRATH | Catalase-peroxidase katG   | R.NLNKLDSPAGNKK.E              | NLNKLDSP           | 741 | 52  | 3.762 | 0.006 |
| splQ2A298IKATG_FRATH | Catalase-peroxidase katG   | R.NLNKLDSPMAGNKK.E             | NLNKLDSPM          | 741 | 53  | 4.088 | 0.000 |
| splQ2A298IKATG_FRATH | Catalase-peroxidase katG   | R.NLNKLDSPMDKAGNKK.K           | NLNKLDSPMDK        | 741 | 55  | 4.144 | 0.000 |
| splQ2A298IKATG_FRATH | Catalase-peroxidase katG   | R.NLNKLDSPMDKDAGNKK.E          | NLNKLDSPMDKD       | 741 | 56  | 4.183 | 0.000 |
| splQ2A298IKATG_FRATH | Catalase-peroxidase katG   | R.NLNKLDSPMDKDAGNKKENR.V       | NLNKLDSPMDKD       | 741 | 56  | 3.7   | 0.000 |
| splQ2A298IKATG_FRATH | Catalase-peroxidase katG   | R.NLNKLDSPM+16DKDAGNKK.E       | NLNKLDSPMDKD       | 741 | 56  | 2.837 | 0.001 |
| splQ2A298IKATG_FRATH | Catalase-peroxidase katG   | R.NLNKLDSPMDKDYAGNKK.E         | NLNKLDSPMDKDY      | 741 | 57  | 4.129 | 0.000 |
| splQ2A298IKATG_FRATH | Catalase-peroxidase katG   | R.NLNKLDSPMDKDYNAGNKK.E        | NLNKLDSPMDKDYN     | 741 | 58  | 3.475 | 0.007 |
| splQ2A298IKATG_FRATH | Catalase-peroxidase katG   | R.NLNKLDSPMDKDYNAGNKKENR.V     | NLNKLDSPMDKDYN     | 741 | 58  | 3.427 | 0.000 |
| splQ2A298IKATG_FRATH | Catalase-peroxidase katG   | R.NLNKLDSPMDKDYNAGNKK.E        | NLNKLDSPMDKDYN     | 741 | 59  | 3.383 | 0.000 |
| splQ2A298IKATG_FRATH | Catalase-peroxidase katG   | K.LDSPMDKDYNHYQAGNKK.E         | LDSPMDKDYNHYQ      | 741 | 61  | 2.729 | 0.001 |
| splQ2A298IKATG_FRATH | Catalase-peroxidase katG   | K.DYNYHQAAGNKK.E               | DYNYHQA            | 741 | 62  | 2.477 | 0.000 |
| splQ2A298IKATG_FRATH | Catalase-peroxidase katG   | R.NLNKLDSPMDKDYNHYQAAGNKK.E    | NLNKLDSPMDKDYNHYQA | 741 | 62  | 3.092 | 0.001 |
| splQ2A298IKATG_FRATH | Catalase-peroxidase katG   | R.NLNKLDSPMDKDYNHYQAAGNKK.K    | NLNKLDSPMDKDYNHYQA | 741 | 62  | 2.964 | 0.000 |
| splQ2A298IKATG_FRATH | Catalase-peroxidase katG   | R.NLNKLDSPM+16DKDYNHYQAAGNKK.E | NLNKLDSPMDKDYNHYQA | 741 | 62  | 2.703 | 0.008 |

**Table S2.** Junction peptides identified by MudPIT-LC-MS-MS analysis of *F. tularensis* tmRNA- tagged proteins.

|                      |                                                             |                         |     |     |       |       |
|----------------------|-------------------------------------------------------------|-------------------------|-----|-----|-------|-------|
| splQ2A298IKATG_FRATH | Catalase-peroxidase katG K.KLDTEQLAGNKK.E                   | KLDTEQL                 | 741 | 71  | 3.797 | 0.006 |
| splQ2A298IKATG_FRATH | Catalase-peroxidase katG K.DMQDLAGNKK.E                     | DMQDL                   | 741 | 78  | 3.701 | 0.002 |
| splQ2A298IKATG_FRATH | Catalase-peroxidase katG D.TEQLKKDMQDLAGNKK.E.N             | TEQLKKDMQDL             | 741 | 78  | 4.004 | 0.001 |
| splQ2A298IKATG_FRATH | Catalase-peroxidase katG K.DMQDLLTQAGNKK.E                  | DMQDLLTQ                | 741 | 81  | 4.039 | 0.000 |
| splQ2A298IKATG_FRATH | Catalase-peroxidase katG K.DMQDLLTQAGNKK.K                  | DMQDLLTQ                | 741 | 81  | 3.819 | 0.000 |
| splQ2A298IKATG_FRATH | Catalase-peroxidase katG K.DMQDLLTQSQAGNKK.E                | DMQDLLTQSQ              | 741 | 83  | 4.317 | 0.000 |
| splQ2A298IKATG_FRATH | Catalase-peroxidase katG K.DMQDLLTQSQDWAGNKK.E              | DMQDLLTQSQDW            | 741 | 85  | 4.28  | 0.000 |
| splQ2A298IKATG_FRATH | Catalase-peroxidase katG E.QLKKDMQDLLTQSQDWAGNKK.E.N        | QLKKDMQDLLTQSQDW        | 741 | 85  | 2.301 | 0.000 |
| splQ2A298IKATG_FRATH | Catalase-peroxidase katG K.DMQDLLTQSQDWWPADFGAGNKK.E        | DMQDLLTQSQDWWPADFG      | 741 | 90  | 4.42  | 0.000 |
| splQ2A298IKATG_FRATH | Catalase-peroxidase katG *.DMQDLLTQSQDWWPADFGAGNKK.E        | DMQDLLTQSQDWWPADFG      | 741 | 91  | 4.445 | 0.000 |
| splQ2A298IKATG_FRATH | Catalase-peroxidase katG D.MQDLLTQSQDWWPADFGAGNKK.E.N       | MQDLLTQSQDWWPADFG       | 741 | 91  | 3.728 | 0.000 |
| splQ2A298IKATG_FRATH | Catalase-peroxidase katG *.DMQDLLTQSQDWWPADFGNYGPFAGNKK.E   | DMQDLLTQSQDWWPADFGNYGPF | 741 | 97  | 3.192 | 0.000 |
| splQ2A298IKATG_FRATH | Catalase-peroxidase katG D.M+16QDLLTQSQDWWPADFGNYGPFAGNKK.E | MQDLLTQSQDWWPADFGNYGPF  | 741 | 97  | 2.803 | 0.000 |
| splQ2A298IKATG_FRATH | Catalase-peroxidase katG K.DMQDLLTQSQDWWPADFGNYGPFAGNKK.E   | DMQDLLTQSQDWWPADFGNYGPF | 741 | 98  | 3.711 | 0.000 |
| splQ2A298IKATG_FRATH | Catalase-peroxidase katG R.LSWHDAGAGNKK.E                   | LSWHDAG                 | 741 | 106 | 3.998 | 0.000 |
| splQ2A298IKATG_FRATH | Catalase-peroxidase katG R.LSWHDAGAGNKK.K                   | LSWHDAG                 | 741 | 106 | 3.723 | 0.000 |
| splQ2A298IKATG_FRATH | Catalase-peroxidase katG R.LSWHDAGTAGNKK.E                  | LSWHDAGT                | 741 | 107 | 4.261 | 0.000 |
| splQ2A298IKATG_FRATH | Catalase-peroxidase katG R.LSWHDAGTYAGNKK.E                 | LSWHDAGTY               | 741 | 108 | 4.241 | 0.000 |
| splQ2A298IKATG_FRATH | Catalase-peroxidase katG R.LSWHDAGTYAGNKK.K                 | LSWHDAGTY               | 741 | 108 | 4.202 | 0.000 |
| splQ2A298IKATG_FRATH | Catalase-peroxidase katG R.FSPLNSWAGNKK.K                   | FSPLNSW                 | 741 | 130 | 4.242 | 0.000 |
| splQ2A298IKATG_FRATH | Catalase-peroxidase katG R.FSPLNSWAGNKK.E                   | FSPLNSW                 | 741 | 130 | 3.745 | 0.000 |
| splQ2A298IKATG_FRATH | Catalase-peroxidase katG R.FSPLNSWPAGNKK.K                  | FSPLNSWP                | 741 | 131 | 2.809 | 0.000 |
| splQ2A298IKATG_FRATH | Catalase-peroxidase katG R.FSPLNSWPDAGNKK.K                 | FSPLNSWPD               | 741 | 132 | 4.409 | 0.000 |
| splQ2A298IKATG_FRATH | Catalase-peroxidase katG R.FSPLNSWPDAGNKK.E                 | FSPLNSWPD               | 741 | 132 | 4.325 | 0.000 |
| splQ2A298IKATG_FRATH | Catalase-peroxidase katG R.FSPLNSWPDNAGNKK.E                | FSPLNSWPDN              | 741 | 133 | 4.252 | 0.000 |
| splQ2A298IKATG_FRATH | Catalase-peroxidase katG R.FSPLNSWPDNVAGNKK.K               | FSPLNSWPDNV             | 741 | 134 | 4.371 | 0.000 |
| splQ2A298IKATG_FRATH | Catalase-peroxidase katG R.FSPLNSWPDNVAGNKK.E               | FSPLNSWPDNV             | 741 | 134 | 4.198 | 0.000 |
| splQ2A298IKATG_FRATH | Catalase-peroxidase katG R.FSPLNSWPDNVNAGNKK.K              | FSPLNSWPDNVN            | 741 | 135 | 4.49  | 0.000 |
| splQ2A298IKATG_FRATH | Catalase-peroxidase katG R.FSPLNSWPDNVNAGNKK.E              | FSPLNSWPDNVN            | 741 | 135 | 3.908 | 0.000 |
| splQ2A298IKATG_FRATH | Catalase-peroxidase katG R.FSPLNSWPDNVNLAGNKK.K             | FSPLNSWPDNVN            | 741 | 136 | 4.425 | 0.001 |
| splQ2A298IKATG_FRATH | Catalase-peroxidase katG R.FSPLNSWPDNVNLAGNKK.E             | FSPLNSWPDNVN            | 741 | 136 | 4.403 | 0.000 |
| splQ2A298IKATG_FRATH | Catalase-peroxidase katG K.YGDAVSWAGNKK.E                   | YGDAVSW                 | 741 | 156 | 4.209 | 0.000 |
| splQ2A298IKATG_FRATH | Catalase-peroxidase katG K.YGDAVSWSDLIAGNKK.K               | YGDAVSWSDLI             | 741 | 160 | 3.423 | 0.000 |

**Table S2.** Junction peptides identified by MudPIT-LC-MS-MS analysis of *F. tularensis* tmRNA- tagged proteins.

|                      |                          |                                 |                        |     |     |       |       |
|----------------------|--------------------------|---------------------------------|------------------------|-----|-----|-------|-------|
| splQ2A298IKATG_FRATH | Catalase-peroxidase katG | K.YGDAVSWSDLIVLAGTAGNKK.E       | YGDAVSWSDLIVLAGT       | 741 | 165 | 2.082 | 0.002 |
| splQ2A298IKATG_FRATH | Catalase-peroxidase katG | K.YGDAVSWSDLIVLAGTVAGNKK.E      | YGDAVSWSDLIVLAGTV      | 741 | 166 | 3.521 | 0.000 |
| splQ2A298IKATG_FRATH | Catalase-peroxidase katG | K.YGDAVSWSDLIVLAGTVSLAGNKK.E    | YGDAVSWSDLIVLAGTVSL    | 741 | 168 | 3.142 | 0.000 |
| splQ2A298IKATG_FRATH | Catalase-peroxidase katG | E.SMGMKPIAGNKK.E.N              | SMGMKPI                | 741 | 176 | 4.136 | 0.001 |
| splQ2A298IKATG_FRATH | Catalase-peroxidase katG | E.SMGMKPIAGNK.K                 | SMGMKPI                | 741 | 176 | 4.059 | 0.000 |
| splQ2A298IKATG_FRATH | Catalase-peroxidase katG | E.SMGMKPIAGNKK.E                | SMGMKPI                | 741 | 176 | 3.953 | 0.001 |
| splQ2A298IKATG_FRATH | Catalase-peroxidase katG | E.SM+16GMKPIAGNKK.E             | SMGMKPI                | 741 | 176 | 2.875 | 0.008 |
| splQ2A298IKATG_FRATH | Catalase-peroxidase katG | E.SMGM+16KPIAGNK.K              | SMGMKPI                | 741 | 176 | 2.158 | 0.009 |
| splQ2A298IKATG_FRATH | Catalase-peroxidase katG | E.SM+16GMKPIAGNK.K              | SMGMKPI                | 741 | 176 | 2.066 | 0.001 |
| splQ2A298IKATG_FRATH | Catalase-peroxidase katG | E.SMGMKPIGAGNK.K                | SMGMKPIG               | 741 | 177 | 4.05  | 0.000 |
| splQ2A298IKATG_FRATH | Catalase-peroxidase katG | E.SMGMKPIGAGNKK.E               | SMGMKPIG               | 741 | 177 | 3.914 | 0.000 |
| splQ2A298IKATG_FRATH | Catalase-peroxidase katG | E.SMGMKPIGAGNKK.E.N             | SMGMKPIG               | 741 | 177 | 3.353 | 0.000 |
| splQ2A298IKATG_FRATH | Catalase-peroxidase katG | E.SMGMKPIGFAGNK.K.E             | SMGMKPIGF              | 741 | 178 | 3.56  | 0.010 |
| splQ2A298IKATG_FRATH | Catalase-peroxidase katG | E.SMGMKPIGFAAGNK.K              | SMGMKPIGFA             | 741 | 179 | 4.181 | 0.000 |
| splQ2A298IKATG_FRATH | Catalase-peroxidase katG | K.PIGFAFAGNK.K                  | PIGFAF                 | 741 | 180 | 4.208 | 0.000 |
| splQ2A298IKATG_FRATH | Catalase-peroxidase katG | E.SMGMKPIGFAFAGNK.K             | SMGMKPIGFAF            | 741 | 180 | 4.257 | 0.000 |
| splQ2A298IKATG_FRATH | Catalase-peroxidase katG | E.SMGMKPIGFAFAGNKK.E            | SMGMKPIGFAF            | 741 | 180 | 3.632 | 0.001 |
| splQ2A298IKATG_FRATH | Catalase-peroxidase katG | K.PIGFAFGAGNK.K                 | PIGFAFG                | 741 | 181 | 3.285 | 0.000 |
| splQ2A298IKATG_FRATH | Catalase-peroxidase katG | E.SMGMKPIGFAFGAGNK.K            | SMGMKPIGFAFG           | 741 | 181 | 4.317 | 0.000 |
| splQ2A298IKATG_FRATH | Catalase-peroxidase katG | E.SMGMKPIGFAFGAGNKK.E           | SMGMKPIGFAFG           | 741 | 181 | 3.374 | 0.000 |
| splQ2A298IKATG_FRATH | Catalase-peroxidase katG | E.SMGMKPIGFAFGREDDWQGDDTAGNKK.E | SMGMKPIGFAFGREDDWQGDDT | 741 | 191 | 3.463 | 0.000 |
| splQ2A298IKATG_FRATH | Catalase-peroxidase katG | D.GKLAPAYAAAGNKK.E.N            | GKLAPAYAA              | 741 | 216 | 4.064 | 0.000 |
| splQ2A298IKATG_FRATH | Catalase-peroxidase katG | K.LAPAYAAAGNKK.E                | LAPAYAA                | 741 | 216 | 4.343 | 0.005 |
| splQ2A298IKATG_FRATH | Catalase-peroxidase katG | K.LAPAYAAAGNK.K                 | LAPAYAA                | 741 | 216 | 3.59  | 0.003 |
| splQ2A298IKATG_FRATH | Catalase-peroxidase katG | K.LAPAYAAAGNKK.E.N              | LAPAYAA                | 741 | 216 | 3.574 | 0.000 |
| splQ2A298IKATG_FRATH | Catalase-peroxidase katG | D.GKLAPAYAATAGNKK.E.N           | GKLAPAYAAT             | 741 | 217 | 4.354 | 0.000 |
| splQ2A298IKATG_FRATH | Catalase-peroxidase katG | *.GKLAPAYAATQAGNKK.E.N          | GKLAPAYAATQ            | 741 | 218 | 2.477 | 0.002 |
| splQ2A298IKATG_FRATH | Catalase-peroxidase katG | K.LAPAYAATQAGNKK.E              | LAPAYAATQ              | 741 | 218 | 4.535 | 0.000 |
| splQ2A298IKATG_FRATH | Catalase-peroxidase katG | K.LAPAYAATQAGNKK.E.N            | LAPAYAATQ              | 741 | 218 | 4.162 | 0.000 |
| splQ2A298IKATG_FRATH | Catalase-peroxidase katG | K.LAPAYAATQAGNK.K               | LAPAYAATQ              | 741 | 218 | 4.129 | 0.004 |
| splQ2A298IKATG_FRATH | Catalase-peroxidase katG | K.LAPAYAATQMAGNKK.E             | LAPAYAATQM             | 741 | 219 | 4.439 | 0.000 |
| splQ2A298IKATG_FRATH | Catalase-peroxidase katG | K.LAPAYAATQMAGNK.K              | LAPAYAATQM             | 741 | 219 | 4.285 | 0.003 |
| splQ2A298IKATG_FRATH | Catalase-peroxidase katG | K.LAPAYAATQM+16AGNK.K           | LAPAYAATQM             | 741 | 219 | 4.071 | 0.000 |

**Table S2.** Junction peptides identified by MudPIT-LC-MS-MS analysis of *F. tularensis* tmRNA- tagged proteins.

|                      |                          |                                      |                          |     |     |       |       |
|----------------------|--------------------------|--------------------------------------|--------------------------|-----|-----|-------|-------|
| splQ2A298IKATG_FRATH | Catalase-peroxidase katG | K.LAPAYAATQM+16AGNKK.E               | LAPAYAATQM               | 741 | 219 | 3.861 | 0.000 |
| splQ2A298IKATG_FRATH | Catalase-peroxidase katG | K.LAPAYAATQMAGNKK.E                  | LAPAYAATQMG              | 741 | 220 | 4.531 | 0.000 |
| splQ2A298IKATG_FRATH | Catalase-peroxidase katG | K.LAPAYAATQM+16GAGNK.K               | LAPAYAATQMG              | 741 | 220 | 3.997 | 0.000 |
| splQ2A298IKATG_FRATH | Catalase-peroxidase katG | K.LAPAYAATQMAGNKK.K                  | LAPAYAATQMG              | 741 | 220 | 3.852 | 0.000 |
| splQ2A298IKATG_FRATH | Catalase-peroxidase katG | K.LAPAYAATQM+16GAGNKK.E              | LAPAYAATQMG              | 741 | 220 | 3.751 | 0.000 |
| splQ2A298IKATG_FRATH | Catalase-peroxidase katG | K.LAPAYAATQM+16GAGNKE.N              | LAPAYAATQMG              | 741 | 220 | 2.991 | 0.000 |
| splQ2A298IKATG_FRATH | Catalase-peroxidase katG | K.LAPAYAATQMGLAGNK.K                 | LAPAYAATQMGL             | 741 | 221 | 4.48  | 0.000 |
| splQ2A298IKATG_FRATH | Catalase-peroxidase katG | K.LAPAYAATQMGLAGNKK.E                | LAPAYAATQMGL             | 741 | 221 | 4.444 | 0.000 |
| splQ2A298IKATG_FRATH | Catalase-peroxidase katG | K.LAPAYAATQM+16GLAGNK.K              | LAPAYAATQMGL             | 741 | 221 | 3.917 | 0.000 |
| splQ2A298IKATG_FRATH | Catalase-peroxidase katG | K.LAPAYAATQM+16GLAGNKK.E             | LAPAYAATQMGL             | 741 | 221 | 3.772 | 0.001 |
| splQ2A298IKATG_FRATH | Catalase-peroxidase katG | K.LAPAYAATQMGLIAGNK.K                | LAPAYAATQMGLI            | 741 | 222 | 4.401 | 0.000 |
| splQ2A298IKATG_FRATH | Catalase-peroxidase katG | K.LAPAYAATQMGLIAGNKK.E               | LAPAYAATQMGLI            | 741 | 222 | 4.001 | 0.001 |
| splQ2A298IKATG_FRATH | Catalase-peroxidase katG | K.LAPAYAATQM+16GLIAGNK.K             | LAPAYAATQMGLI            | 741 | 222 | 3.973 | 0.000 |
| splQ2A298IKATG_FRATH | Catalase-peroxidase katG | K.LAPAYAATQMGLIYAGNKK.E              | LAPAYAATQMGLIY           | 741 | 223 | 4.457 | 0.000 |
| splQ2A298IKATG_FRATH | Catalase-peroxidase katG | K.LAPAYAATQM+16GLIYAGNK.K            | LAPAYAATQMGLIY           | 741 | 223 | 3.989 | 0.000 |
| splQ2A298IKATG_FRATH | Catalase-peroxidase katG | K.LAPAYAATQMGLIYAGNK.K               | LAPAYAATQMGLIY           | 741 | 223 | 3.968 | 0.000 |
| splQ2A298IKATG_FRATH | Catalase-peroxidase katG | K.LAPAYAATQMGLIYVAGNKK.E             | LAPAYAATQMGLIYV          | 741 | 224 | 4.405 | 0.000 |
| splQ2A298IKATG_FRATH | Catalase-peroxidase katG | K.LAPAYAATQMGLIYVAGNK.K              | LAPAYAATQMGLIYV          | 741 | 224 | 4.3   | 0.000 |
| splQ2A298IKATG_FRATH | Catalase-peroxidase katG | K.LAPAYAATQM+16GLIYVAGNK.K           | LAPAYAATQMGLIYV          | 741 | 224 | 4.017 | 0.000 |
| splQ2A298IKATG_FRATH | Catalase-peroxidase katG | K.LAPAYAATQMGLIYVNAGNKK.E            | LAPAYAATQMGLIYVN         | 741 | 225 | 4.31  | 0.000 |
| splQ2A298IKATG_FRATH | Catalase-peroxidase katG | K.LAPAYAATQMGLIYVNAGNK.K             | LAPAYAATQMGLIYVN         | 741 | 225 | 3.691 | 0.000 |
| splQ2A298IKATG_FRATH | Catalase-peroxidase katG | K.LAPAYAATQMGLIYVNPAGNK.K            | LAPAYAATQMGLIYVNP        | 741 | 226 | 4.483 | 0.001 |
| splQ2A298IKATG_FRATH | Catalase-peroxidase katG | K.LAPAYAATQM+16GLIYVNPAGNK.K         | LAPAYAATQMGLIYVNP        | 741 | 226 | 4.053 | 0.000 |
| splQ2A298IKATG_FRATH | Catalase-peroxidase katG | K.LAPAYAATQMGLIYVNPEGAGNK.K          | LAPAYAATQMGLIYVNPEG      | 741 | 228 | 3.742 | 0.000 |
| splQ2A298IKATG_FRATH | Catalase-peroxidase katG | K.LAPAYAATQMGLIYVNPEGAGNKK.E         | LAPAYAATQMGLIYVNPEG      | 741 | 228 | 2.394 | 0.005 |
| splQ2A298IKATG_FRATH | Catalase-peroxidase katG | K.LAPAYAATQMGLIYVNPEGPAGNKK.E        | LAPAYAATQMGLIYVNPEGP     | 741 | 229 | 4.408 | 0.000 |
| splQ2A298IKATG_FRATH | Catalase-peroxidase katG | K.LAPAYAATQMGLIYVNPEGPAGNK.K         | LAPAYAATQMGLIYVNPEGP     | 741 | 229 | 3.411 | 0.000 |
| splQ2A298IKATG_FRATH | Catalase-peroxidase katG | K.LAPAYAATQMGLIYVNPEGPDAGNK.K        | LAPAYAATQMGLIYVNPEGPD    | 741 | 230 | 3.63  | 0.000 |
| splQ2A298IKATG_FRATH | Catalase-peroxidase katG | K.LAPAYAATQMGLIYVNPEGPDGKPAGNK.K     | LAPAYAATQMGLIYVNPEGPDGKP | 741 | 233 | 3.538 | 0.000 |
| splQ2A298IKATG_FRATH | Catalase-peroxidase katG | K.LAPAYAATQMGLIYVNPEGPDGKPAGNKK.E    | LAPAYAATQMGLIYVNPEGPDGKP | 741 | 233 | 2.966 | 0.000 |
| splQ2A298IKATG_FRATH | Catalase-peroxidase katG | K.LAPAYAATQM+16GLIYVNPEGPDGKPAGNKK.E | LAPAYAATQMGLIYVNPEGPDGKP | 741 | 233 | 2.544 | 0.000 |
| splQ2A298IKATG_FRATH | Catalase-peroxidase katG | R.AMGMTDKAGNK.K                      | AMGMTDK                  | 741 | 254 | 3.318 | 0.000 |
| splQ2A298IKATG_FRATH | Catalase-peroxidase katG | R.AMGMTDKEAGNK.E                     | AMGMTDKE                 | 741 | 255 | 3.416 | 0.001 |

**Table S2.** Junction peptides identified by MudPIT-LC-MS-MS analysis of *F. tularensis* tmRNA- tagged proteins.

|                      |                                                        |                     |     |     |       |       |
|----------------------|--------------------------------------------------------|---------------------|-----|-----|-------|-------|
| splQ2A298IKATG_FRATH | Catalase-peroxidase katG R.AMGMTDKETAGNKK.E            | AMGMTDKET           | 741 | 256 | 3.908 | 0.000 |
| splQ2A298IKATG_FRATH | Catalase-peroxidase katG R.AMGMTDKETVAGNKK.E           | AMGMTDKETV          | 741 | 257 | 4.097 | 0.000 |
| splQ2A298IKATG_FRATH | Catalase-peroxidase katG E.IRQAFRAMGMTDKETVAGNKK.E.N   | IRQAFRAMGMTDKETV    | 741 | 257 | 2.392 | 0.008 |
| splQ2A298IKATG_FRATH | Catalase-peroxidase katG R.AMGMTDKETVAAGNKK.E          | AMGMTDKETVA         | 741 | 258 | 4.017 | 0.000 |
| splQ2A298IKATG_FRATH | Catalase-peroxidase katG R.AMGMTDKETVALIAAGNKK.E       | AMGMTDKETVALIA      | 741 | 261 | 3.446 | 0.000 |
| splQ2A298IKATG_FRATH | Catalase-peroxidase katG E.TVALIAAGNKK.E.N             | TVALIA              | 741 | 261 | 3.766 | 0.009 |
| splQ2A298IKATG_FRATH | Catalase-peroxidase katG E.TVALIAAGNKK.E               | TVALIA              | 741 | 261 | 3.321 | 0.002 |
| splQ2A298IKATG_FRATH | Catalase-peroxidase katG E.TVALIAGAGNKK.E.N            | TVALIAG             | 741 | 262 | 4.13  | 0.002 |
| splQ2A298IKATG_FRATH | Catalase-peroxidase katG R.AMGMTDKETVALIAGGAGNKK.E     | AMGMTDKETVALIAGG    | 741 | 263 | 3.784 | 0.000 |
| splQ2A298IKATG_FRATH | Catalase-peroxidase katG *.ETVALIAGGAGNKK.E            | ETVALIAGG           | 741 | 263 | 3.895 | 0.000 |
| splQ2A298IKATG_FRATH | Catalase-peroxidase katG E.TVALIAGGAGNKK.E.N           | TVALIAGG            | 741 | 263 | 4.323 | 0.001 |
| splQ2A298IKATG_FRATH | Catalase-peroxidase katG E.TVALIAGGAGNKK.E             | TVALIAGG            | 741 | 263 | 4.264 | 0.000 |
| splQ2A298IKATG_FRATH | Catalase-peroxidase katG E.TVALIAGGAGNK.K              | TVALIAGG            | 741 | 263 | 2.87  | 0.001 |
| splQ2A298IKATG_FRATH | Catalase-peroxidase katG E.TVALIAGGHAGNK.K             | TVALIAGGH           | 741 | 264 | 4.266 | 0.000 |
| splQ2A298IKATG_FRATH | Catalase-peroxidase katG E.TVALIAGGHAGNKK.E            | TVALIAGGH           | 741 | 264 | 4.256 | 0.000 |
| splQ2A298IKATG_FRATH | Catalase-peroxidase katG E.TVALIAGGHAGNKK.E.N          | TVALIAGGH           | 741 | 264 | 3.847 | 0.000 |
| splQ2A298IKATG_FRATH | Catalase-peroxidase katG *.ETVALIAGGHTAGNKK.E          | ETVALIAGGHT         | 741 | 265 | 4.084 | 0.000 |
| splQ2A298IKATG_FRATH | Catalase-peroxidase katG E.TVALIAGGHTAGNKK.E.N         | TVALIAGGHT          | 741 | 265 | 4.279 | 0.002 |
| splQ2A298IKATG_FRATH | Catalase-peroxidase katG E.TVALIAGGHTAGNK.K            | TVALIAGGHT          | 741 | 265 | 4.243 | 0.000 |
| splQ2A298IKATG_FRATH | Catalase-peroxidase katG E.TVALIAGGHTAGNKK.E           | TVALIAGGHT          | 741 | 265 | 4.099 | 0.000 |
| splQ2A298IKATG_FRATH | Catalase-peroxidase katG R.AMGMTDKETVALIAGGHTFAGNKK.E  | AMGMTDKETVALIAGGHTF | 741 | 266 | 3.476 | 0.000 |
| splQ2A298IKATG_FRATH | Catalase-peroxidase katG *.ETVALIAGGHTFAGNK.K          | ETVALIAGGHTF        | 741 | 266 | 4.047 | 0.000 |
| splQ2A298IKATG_FRATH | Catalase-peroxidase katG *.ETVALIAGGHTFAGNKK.E         | ETVALIAGGHTF        | 741 | 266 | 3.277 | 0.000 |
| splQ2A298IKATG_FRATH | Catalase-peroxidase katG E.TVALIAGGHTFAGNK.K           | TVALIAGGHTF         | 741 | 266 | 4.351 | 0.001 |
| splQ2A298IKATG_FRATH | Catalase-peroxidase katG E.TVALIAGGHTFAGNKK.E.N        | TVALIAGGHTF         | 741 | 266 | 3.845 | 0.001 |
| splQ2A298IKATG_FRATH | Catalase-peroxidase katG E.TVALIAGGHTFGAGNKK.E.N       | TVALIAGGHTFG        | 741 | 267 | 4.127 | 0.001 |
| splQ2A298IKATG_FRATH | Catalase-peroxidase katG E.TVALIAGGHTFGAGNKK.E         | TVALIAGGHTFG        | 741 | 267 | 2.952 | 0.004 |
| splQ2A298IKATG_FRATH | Catalase-peroxidase katG E.TVALIAGGHTFGKTHGAGNKK.E.N   | TVALIAGGHTFGKTHG    | 741 | 271 | 2.855 | 0.000 |
| splQ2A298IKATG_FRATH | Catalase-peroxidase katG K.THGAVAGNKK.E                | THGAV               | 741 | 273 | 3.935 | 0.000 |
| splQ2A298IKATG_FRATH | Catalase-peroxidase katG K.THGAVAGNK.K                 | THGAV               | 741 | 273 | 2.131 | 0.003 |
| splQ2A298IKATG_FRATH | Catalase-peroxidase katG E.TVALIAGGHTFGKTHGAVAGNKK.E.N | TVALIAGGHTFGKTHGAV  | 741 | 273 | 3.767 | 0.000 |
| splQ2A298IKATG_FRATH | Catalase-peroxidase katG K.THGAVPEAGNKK.E              | THGAVPE             | 741 | 275 | 3.949 | 0.000 |
| splQ2A298IKATG_FRATH | Catalase-peroxidase katG K.THGAVPEAGNK.K               | THGAVPE             | 741 | 275 | 3.194 | 0.000 |



**Table S2.** Junction peptides identified by MudPIT-LC-MS-MS analysis of *F. tularensis* tmRNA- tagged proteins.

|                      |                                                       |                    |     |     |       |       |
|----------------------|-------------------------------------------------------|--------------------|-----|-----|-------|-------|
| splQ2A298IKATG_FRATH | Catalase-peroxidase katG K.THGAVPEAGNKKENR.V          | THGAVPE            | 741 | 275 | 2.376 | 0.000 |
| splQ2A298IKATG_FRATH | Catalase-peroxidase katG K.THGAVPEDKAGNK.K            | THGAVPEDK          | 741 | 277 | 3.374 | 0.000 |
| splQ2A298IKATG_FRATH | Catalase-peroxidase katG K.THGAVPEDKAGNKK.E           | THGAVPEDK          | 741 | 277 | 2.988 | 0.000 |
| splQ2A298IKATG_FRATH | Catalase-peroxidase katG K.THGAVPEDKVAGNK.K           | THGAVPEDKV         | 741 | 278 | 3.913 | 0.005 |
| splQ2A298IKATG_FRATH | Catalase-peroxidase katG K.THGAVPEDKVAGNKK.E          | THGAVPEDKV         | 741 | 278 | 3.867 | 0.004 |
| splQ2A298IKATG_FRATH | Catalase-peroxidase katG K.THGAVPEDKVAGNKKENR.V       | THGAVPEDKV         | 741 | 278 | 3.423 | 0.000 |
| splQ2A298IKATG_FRATH | Catalase-peroxidase katG E.DKVKQAIGAGNKK.E.N          | DKVKQAIG           | 741 | 283 | 3.915 | 0.000 |
| splQ2A298IKATG_FRATH | Catalase-peroxidase katG K.QAIGPAAGNKK.E              | QAIGPA             | 741 | 285 | 2.192 | 0.009 |
| splQ2A298IKATG_FRATH | Catalase-peroxidase katG K.VKQAIGPAAGNKK.E            | VKQAIGPA           | 741 | 285 | 3.14  | 0.000 |
| splQ2A298IKATG_FRATH | Catalase-peroxidase katG E.DKVKQAIGPAPAGNKK.E.N       | DKVKQAIGPAP        | 741 | 286 | 4.293 | 0.000 |
| splQ2A298IKATG_FRATH | Catalase-peroxidase katG K.QAIGPAPAGNKK.E             | QAIGPAP            | 741 | 286 | 2.862 | 0.006 |
| splQ2A298IKATG_FRATH | Catalase-peroxidase katG E.DKVKQAIGPAPDAGNKK.E.N      | DKVKQAIGPAPD       | 741 | 287 | 4.357 | 0.001 |
| splQ2A298IKATG_FRATH | Catalase-peroxidase katG K.QAIGPAPDAGNKKENR.V         | QAIGPAPD           | 741 | 287 | 2.506 | 0.003 |
| splQ2A298IKATG_FRATH | Catalase-peroxidase katG E.DKVKQAIGPAPDKAGNKK.E.N     | DKVKQAIGPAPDK      | 741 | 288 | 4.206 | 0.000 |
| splQ2A298IKATG_FRATH | Catalase-peroxidase katG E.DKVKQAIGPAPDKAAGNKK.E.N    | DKVKQAIGPAPDKA     | 741 | 289 | 3.303 | 0.000 |
| splQ2A298IKATG_FRATH | Catalase-peroxidase katG E.DKVKQAIGPAPDKAPAGNKK.E.N   | DKVKQAIGPAPDKAP    | 741 | 290 | 3.333 | 0.000 |
| splQ2A298IKATG_FRATH | Catalase-peroxidase katG K.QAIGPAPDKAPAGNKK.E         | QAIGPAPDKAP        | 741 | 290 | 2.824 | 0.004 |
| splQ2A298IKATG_FRATH | Catalase-peroxidase katG K.QAIGPAPDKAPIAGNK.K         | QAIGPAPDKAPI       | 741 | 291 | 3.211 | 0.002 |
| splQ2A298IKATG_FRATH | Catalase-peroxidase katG K.QAIGPAPDKAPIAGNKK.E        | QAIGPAPDKAPI       | 741 | 291 | 2.616 | 0.000 |
| splQ2A298IKATG_FRATH | Catalase-peroxidase katG E.DKVKQAIGPAPDKAPIEAGNKK.E.N | DKVKQAIGPAPDKAPIE  | 741 | 292 | 3.3   | 0.000 |
| splQ2A298IKATG_FRATH | Catalase-peroxidase katG K.QAIGPAPDKAPIEAGNKKENR.V    | QAIGPAPDKAPIE      | 741 | 292 | 3.289 | 0.005 |
| splQ2A298IKATG_FRATH | Catalase-peroxidase katG K.QAIGPAPDKAPIEAGNKK.E       | QAIGPAPDKAPIE      | 741 | 292 | 2.925 | 0.005 |
| splQ2A298IKATG_FRATH | Catalase-peroxidase katG K.QAIGPAPDKAPIEQAGNKK.E      | QAIGPAPDKAPIEQ     | 741 | 293 | 3.521 | 0.009 |
| splQ2A298IKATG_FRATH | Catalase-peroxidase katG K.QAIGPAPDKAPIEQQAGNKK.E     | QAIGPAPDKAPIEQQ    | 741 | 294 | 2.515 | 0.001 |
| splQ2A298IKATG_FRATH | Catalase-peroxidase katG K.QAIGPAPDKAPIEQQAGNKK.E     | QAIGPAPDKAPIEQQG   | 741 | 295 | 3.081 | 0.000 |
| splQ2A298IKATG_FRATH | Catalase-peroxidase katG K.APIEQQGLAGNKK.E            | APIEQQGL           | 741 | 296 | 4.234 | 0.000 |
| splQ2A298IKATG_FRATH | Catalase-peroxidase katG K.QAIGPAPDKAPIEQQGLAGNKK.E   | QAIGPAPDKAPIEQQGL  | 741 | 296 | 2.796 | 0.000 |
| splQ2A298IKATG_FRATH | Catalase-peroxidase katG K.QAIGPAPDKAPIEQQGLAGNK.K    | QAIGPAPDKAPIEQQGL  | 741 | 296 | 2.582 | 0.003 |
| splQ2A298IKATG_FRATH | Catalase-peroxidase katG K.APIEQQGLGAGNKK.E           | APIEQQGLG          | 741 | 297 | 4.049 | 0.000 |
| splQ2A298IKATG_FRATH | Catalase-peroxidase katG K.QAIGPAPDKAPIEQQGLGAGNK.K   | QAIGPAPDKAPIEQQGLG | 741 | 297 | 3.537 | 0.000 |
| splQ2A298IKATG_FRATH | Catalase-peroxidase katG K.QAIGPAPDKAPIEQQGLGAGNKK.E  | QAIGPAPDKAPIEQQGLG | 741 | 297 | 3.18  | 0.000 |
| splQ2A298IKATG_FRATH | Catalase-peroxidase katG K.APIEQQGLGWAGNKK.E          | APIEQQGLGW         | 741 | 298 | 4.069 | 0.000 |
| splQ2A298IKATG_FRATH | Catalase-peroxidase katG K.APIEQQGLGWAGNK.K           | APIEQQGLGW         | 741 | 298 | 2.371 | 0.005 |

**Table S2.** Junction peptides identified by MudPIT-LC-MS-MS analysis of *F. tularensis* tmRNA- tagged proteins.

|                      |                          |                                      |                              |     |     |       |       |
|----------------------|--------------------------|--------------------------------------|------------------------------|-----|-----|-------|-------|
| splQ2A298IKATG_FRATH | Catalase-peroxidase katG | K.QAIGPAPDKAPIEQQGLGWAGNK.K          | QAIGPAPDKAPIEQQGLGW          | 741 | 298 | 3.382 | 0.000 |
| splQ2A298IKATG_FRATH | Catalase-peroxidase katG | K.QAIGPAPDKAPIEQQGLGWAGNKK.E         | QAIGPAPDKAPIEQQGLGW          | 741 | 298 | 2.051 | 0.000 |
| splQ2A298IKATG_FRATH | Catalase-peroxidase katG | K.APIEQQGLGWHAGNK.K                  | APIEQQGLGWH                  | 741 | 299 | 4.157 | 0.000 |
| splQ2A298IKATG_FRATH | Catalase-peroxidase katG | K.APIEQQGLGWHNAGNK.K                 | APIEQQGLGWHN                 | 741 | 300 | 4.081 | 0.000 |
| splQ2A298IKATG_FRATH | Catalase-peroxidase katG | K.APIEQQGLGWHNAGNKK.E                | APIEQQGLGWHN                 | 741 | 300 | 2.758 | 0.000 |
| splQ2A298IKATG_FRATH | Catalase-peroxidase katG | K.QAIGPAPDKAPIEQQGLGWHNAGNK.K        | QAIGPAPDKAPIEQQGLGWHN        | 741 | 300 | 2.938 | 0.000 |
| splQ2A298IKATG_FRATH | Catalase-peroxidase katG | *.APIEQQGLGWHNSAGNK.K                | APIEQQGLGWHNS                | 741 | 301 | 4.21  | 0.000 |
| splQ2A298IKATG_FRATH | Catalase-peroxidase katG | *.APIEQQGLGWHNSAGNKK.E               | APIEQQGLGWHNS                | 741 | 301 | 4.089 | 0.000 |
| splQ2A298IKATG_FRATH | Catalase-peroxidase katG | K.QAIGPAPDKAPIEQQGLGWHNSAGNK.K       | QAIGPAPDKAPIEQQGLGWHNS       | 741 | 301 | 3.16  | 0.000 |
| splQ2A298IKATG_FRATH | Catalase-peroxidase katG | *.APIEQQGLGWHNSYAGNK.K               | APIEQQGLGWHNSY               | 741 | 302 | 4.164 | 0.000 |
| splQ2A298IKATG_FRATH | Catalase-peroxidase katG | *.APIEQQGLGWHNSYAGNKK.E              | APIEQQGLGWHNSY               | 741 | 302 | 3.041 | 0.000 |
| splQ2A298IKATG_FRATH | Catalase-peroxidase katG | K.QAIGPAPDKAPIEQQGLGWHNSYAGNKK.E     | QAIGPAPDKAPIEQQGLGWHNSY      | 741 | 302 | 2.036 | 0.003 |
| splQ2A298IKATG_FRATH | Catalase-peroxidase katG | K.APIEQQGLGWHNSYAGNK.K               | APIEQQGLGWHNSYG              | 741 | 303 | 4.205 | 0.000 |
| splQ2A298IKATG_FRATH | Catalase-peroxidase katG | K.QAIGPAPDKAPIEQQGLGWHNSYAGNK.K      | QAIGPAPDKAPIEQQGLGWHNSYG     | 741 | 303 | 2.678 | 0.000 |
| splQ2A298IKATG_FRATH | Catalase-peroxidase katG | K.QAIGPAPDKAPIEQQGLGWHNSYAGNKK.E     | QAIGPAPDKAPIEQQGLGWHNSYG     | 741 | 303 | 2.387 | 0.000 |
| splQ2A298IKATG_FRATH | Catalase-peroxidase katG | K.APIEQQGLGWHNSYGTAGNK.K             | APIEQQGLGWHNSYGT             | 741 | 304 | 3.042 | 0.000 |
| splQ2A298IKATG_FRATH | Catalase-peroxidase katG | K.QAIGPAPDKAPIEQQGLGWHNSYGTAGNK.K    | QAIGPAPDKAPIEQQGLGWHNSYGT    | 741 | 304 | 2.734 | 0.000 |
| splQ2A298IKATG_FRATH | Catalase-peroxidase katG | K.QAIGPAPDKAPIEQQGLGWHNSYGTGAGNKK.E  | QAIGPAPDKAPIEQQGLGWHNSYGTG   | 741 | 305 | 2.428 | 0.000 |
| splQ2A298IKATG_FRATH | Catalase-peroxidase katG | K.QAIGPAPDKAPIEQQGLGWHNSYGTGAGNK.K   | QAIGPAPDKAPIEQQGLGWHNSYGTG   | 741 | 305 | 2.008 | 0.003 |
| splQ2A298IKATG_FRATH | Catalase-peroxidase katG | K.QAIGPAPDKAPIEQQGLGWHNSYGTGNAGNK.K  | QAIGPAPDKAPIEQQGLGWHNSYGTGN  | 741 | 306 | 2.971 | 0.000 |
| splQ2A298IKATG_FRATH | Catalase-peroxidase katG | K.APIEQQGLGWHNSYGTGNGAGNKK.E         | APIEQQGLGWHNSYGTGNG          | 741 | 307 | 2.102 | 0.000 |
| splQ2A298IKATG_FRATH | Catalase-peroxidase katG | K.QAIGPAPDKAPIEQQGLGWHNSYGTGNGAGNK.K | QAIGPAPDKAPIEQQGLGWHNSYGTGNG | 741 | 307 | 2.057 | 0.001 |
| splQ2A298IKATG_FRATH | Catalase-peroxidase katG | K.APIEQQGLGWHNSYGTGNGDAGNKK.E        | APIEQQGLGWHNSYGTGNGD         | 741 | 308 | 2.072 | 0.001 |
| splQ2A298IKATG_FRATH | Catalase-peroxidase katG | K.APIEQQGLGWHNSYGTGNGDDTAGNKK.E      | APIEQQGLGWHNSYGTGNGDDT       | 741 | 310 | 2.318 | 0.000 |
| splQ2A298IKATG_FRATH | Catalase-peroxidase katG | E.GSWTSTPAGNKKE.N                    | GSWTSTP                      | 741 | 323 | 3.679 | 0.000 |
| splQ2A298IKATG_FRATH | Catalase-peroxidase katG | E.GSWTSTPAGNKKENR.V                  | GSWTSTP                      | 741 | 323 | 3.394 | 0.003 |
| splQ2A298IKATG_FRATH | Catalase-peroxidase katG | E.GSWTSTPTAGNKKE.N                   | GSWTSTPT                     | 741 | 324 | 3.715 | 0.000 |
| splQ2A298IKATG_FRATH | Catalase-peroxidase katG | E.GSWTSTPTFAGNKKENR.V                | GSWTSTPTF                    | 741 | 325 | 4.272 | 0.000 |
| splQ2A298IKATG_FRATH | Catalase-peroxidase katG | E.GSWTSTPTFAGNKKE.N                  | GSWTSTPTF                    | 741 | 325 | 3.935 | 0.000 |
| splQ2A298IKATG_FRATH | Catalase-peroxidase katG | E.GSWTSTPTFAGNKK.E                   | GSWTSTPTF                    | 741 | 325 | 3.432 | 0.000 |
| splQ2A298IKATG_FRATH | Catalase-peroxidase katG | E.GSWTSTPTFAGNK.K                    | GSWTSTPTF                    | 741 | 325 | 2.13  | 0.002 |
| splQ2A298IKATG_FRATH | Catalase-peroxidase katG | E.GSWTSTPTFWAGNKKE.N                 | GSWTSTPTFW                   | 741 | 326 | 4.054 | 0.000 |
| splQ2A298IKATG_FRATH | Catalase-peroxidase katG | E.GSWTSTPTFWAGNKK.E                  | GSWTSTPTFW                   | 741 | 326 | 3.546 | 0.000 |

**Table S2.** Junction peptides identified by MudPIT-LC-MS-MS analysis of *F. tularensis* tmRNA- tagged proteins.

|                      |                          |                                    |                           |     |     |       |       |
|----------------------|--------------------------|------------------------------------|---------------------------|-----|-----|-------|-------|
| splQ2A298IKATG_FRATH | Catalase-peroxidase katG | E.GSWTSTPTFWNAGNKKE.N              | GSWTSTPTFWN               | 741 | 327 | 4.213 | 0.000 |
| splQ2A298IKATG_FRATH | Catalase-peroxidase katG | E.GSWTSTPTFWNAGNKK.E               | GSWTSTPTFWN               | 741 | 327 | 4.202 | 0.000 |
| splQ2A298IKATG_FRATH | Catalase-peroxidase katG | E.GSWTSTPTFWNHAGNK.K               | GSWTSTPTFWNH              | 741 | 328 | 4.195 | 0.000 |
| splQ2A298IKATG_FRATH | Catalase-peroxidase katG | E.GSWTSTPTFWNHAGNKK.E              | GSWTSTPTFWNH              | 741 | 328 | 3.959 | 0.000 |
| splQ2A298IKATG_FRATH | Catalase-peroxidase katG | E.GSWTSTPTFWNHDFAGNKK.E            | GSWTSTPTFWNHDF            | 741 | 329 | 4.103 | 0.000 |
| splQ2A298IKATG_FRATH | Catalase-peroxidase katG | E.GSWTSTPTFWNHDFAGNK.K             | GSWTSTPTFWNHDF            | 741 | 330 | 4.256 | 0.000 |
| splQ2A298IKATG_FRATH | Catalase-peroxidase katG | E.GSWTSTPTFWNHDFAGNKKE.N           | GSWTSTPTFWNHDF            | 741 | 330 | 4.096 | 0.000 |
| splQ2A298IKATG_FRATH | Catalase-peroxidase katG | E.GSWTSTPTFWNHDFLAGNK.K            | GSWTSTPTFWNHDFL           | 741 | 331 | 4.369 | 0.000 |
| splQ2A298IKATG_FRATH | Catalase-peroxidase katG | E.GSWTSTPTFWNHDFLAGNKK.E           | GSWTSTPTFWNHDFL           | 741 | 331 | 3.719 | 0.000 |
| splQ2A298IKATG_FRATH | Catalase-peroxidase katG | E.GSWTSTPTFWNHDFLAGNKKE.N          | GSWTSTPTFWNHDFL           | 741 | 331 | 2.282 | 0.003 |
| splQ2A298IKATG_FRATH | Catalase-peroxidase katG | E.GSWTSTPTFWNHDFLHAGNK.K           | GSWTSTPTFWNHDFLH          | 741 | 332 | 4.074 | 0.000 |
| splQ2A298IKATG_FRATH | Catalase-peroxidase katG | E.GSWTSTPTFWNHDFLHAGNKK.E          | GSWTSTPTFWNHDFLH          | 741 | 332 | 2.904 | 0.000 |
| splQ2A298IKATG_FRATH | Catalase-peroxidase katG | E.GSWTSTPTFWNHDFLHAGNKKE.N         | GSWTSTPTFWNHDFLHN         | 741 | 333 | 3.632 | 0.000 |
| splQ2A298IKATG_FRATH | Catalase-peroxidase katG | E.GSWTSTPTFWNHDFLHNLAGNK.K         | GSWTSTPTFWNHDFLHNL        | 741 | 334 | 3.732 | 0.000 |
| splQ2A298IKATG_FRATH | Catalase-peroxidase katG | E.GSWTSTPTFWNHDFLHNLAGNKKE.N       | GSWTSTPTFWNHDFLHNL        | 741 | 334 | 3.331 | 0.004 |
| splQ2A298IKATG_FRATH | Catalase-peroxidase katG | E.GSWTSTPTFWNHDFLHNLAGNK.E         | GSWTSTPTFWNHDFLHNL        | 741 | 334 | 2.931 | 0.000 |
| splQ2A298IKATG_FRATH | Catalase-peroxidase katG | E.GSWTSTPTFWNHDFLHNLNLYAGNKKE.E    | GSWTSTPTFWNHDFLHNLNLY     | 741 | 335 | 3.513 | 0.005 |
| splQ2A298IKATG_FRATH | Catalase-peroxidase katG | E.GSWTSTPTFWNHDFLHNLNLYAGNKKE.N    | GSWTSTPTFWNHDFLHNLNLY     | 741 | 335 | 3.212 | 0.000 |
| splQ2A298IKATG_FRATH | Catalase-peroxidase katG | E.GSWTSTPTFWNHDFLHNLNLYAGNK.K      | GSWTSTPTFWNHDFLHNLNLYN    | 741 | 336 | 3.589 | 0.000 |
| splQ2A298IKATG_FRATH | Catalase-peroxidase katG | E.GSWTSTPTFWNHDFLHNLNLYAGNKKE.N    | GSWTSTPTFWNHDFLHNLNLYN    | 741 | 336 | 3.339 | 0.000 |
| splQ2A298IKATG_FRATH | Catalase-peroxidase katG | E.GSWTSTPTFWNHDFLHNLNLYLAGNK.K     | GSWTSTPTFWNHDFLHNLNLYNLD  | 741 | 337 | 3.34  | 0.000 |
| splQ2A298IKATG_FRATH | Catalase-peroxidase katG | E.GSWTSTPTFWNHDFLHNLNLYLDAGNKKE.N  | GSWTSTPTFWNHDFLHNLNLYNLD  | 741 | 338 | 3.712 | 0.000 |
| splQ2A298IKATG_FRATH | Catalase-peroxidase katG | E.GSWTSTPTFWNHDFLHNLNLYLDAGNKKE.N  | GSWTSTPTFWNHDFLHNLNLYNLD  | 741 | 338 | 2.447 | 0.000 |
| splQ2A298IKATG_FRATH | Catalase-peroxidase katG | E.GSWTSTPTFWNHDFLHNLNLYLDWAGNKKE.N | GSWTSTPTFWNHDFLHNLNLYNLDW | 741 | 339 | 3.769 | 0.000 |
| splQ2A298IKATG_FRATH | Catalase-peroxidase katG | K.KTLSPAGAGNKKE.E                  | KTLSPAG                   | 741 | 347 | 2.005 | 0.005 |
| splQ2A298IKATG_FRATH | Catalase-peroxidase katG | K.TLSPAGAGNKKE.E                   | TLSPAG                    | 741 | 347 | 2.707 | 0.001 |
| splQ2A298IKATG_FRATH | Catalase-peroxidase katG | K.KTLSPAGAAGNKKE.E                 | KTLSPAGA                  | 741 | 348 | 3.569 | 0.000 |
| splQ2A298IKATG_FRATH | Catalase-peroxidase katG | K.TLSPAGAAGNKKE.E                  | TLSPAGA                   | 741 | 348 | 4.21  | 0.000 |
| splQ2A298IKATG_FRATH | Catalase-peroxidase katG | K.TLSPAGAAGNK.K                    | TLSPAGA                   | 741 | 348 | 3.182 | 0.006 |
| splQ2A298IKATG_FRATH | Catalase-peroxidase katG | K.KTLSPAGAHAGNKKE.E                | KTLSPAGAH                 | 741 | 349 | 2.201 | 0.001 |
| splQ2A298IKATG_FRATH | Catalase-peroxidase katG | K.TLSPAGAHAGNKKE.N                 | TLSPAGAH                  | 741 | 349 | 4.153 | 0.001 |
| splQ2A298IKATG_FRATH | Catalase-peroxidase katG | K.TLSPAGAHAGNKKE.E                 | TLSPAGAH                  | 741 | 349 | 4.148 | 0.005 |
| splQ2A298IKATG_FRATH | Catalase-peroxidase katG | K.TLSPAGAHAGNK.K                   | TLSPAGAH                  | 741 | 349 | 4.128 | 0.008 |

**Table S2.** Junction peptides identified by MudPIT-LC-MS-MS analysis of *F. tularensis* tmRNA- tagged proteins.

|                      |                                                            |                           |     |     |       |       |
|----------------------|------------------------------------------------------------|---------------------------|-----|-----|-------|-------|
| splQ2A298IKATG_FRATH | Catalase-peroxidase katG K.TLSPAGAHAGNKKENR.V              | TLSPAGAH                  | 741 | 349 | 2.567 | 0.000 |
| splQ2A298IKATG_FRATH | Catalase-peroxidase katG K.K.TLSPAGAHQAGNKK.E              | KTLSPAGAHQ                | 741 | 350 | 3.064 | 0.000 |
| splQ2A298IKATG_FRATH | Catalase-peroxidase katG K.TLSPAGAHQAGNKK.E                | TLSPAGAHQ                 | 741 | 350 | 4.368 | 0.000 |
| splQ2A298IKATG_FRATH | Catalase-peroxidase katG K.TLSPAGAHQAGNK.K                 | TLSPAGAHQ                 | 741 | 350 | 4.257 | 0.008 |
| splQ2A298IKATG_FRATH | Catalase-peroxidase katG K.TLSPAGAHQAGNKK.E.N              | TLSPAGAHQ                 | 741 | 350 | 4.215 | 0.001 |
| splQ2A298IKATG_FRATH | Catalase-peroxidase katG K.TLSPAGAHQAGNKKENR.V             | TLSPAGAHQ                 | 741 | 350 | 3.528 | 0.001 |
| splQ2A298IKATG_FRATH | Catalase-peroxidase katG K.TLSPAGAHQWAGNKKE.N              | TLSPAGAHQW                | 741 | 351 | 4.383 | 0.000 |
| splQ2A298IKATG_FRATH | Catalase-peroxidase katG K.TLSPAGAHQWAGNKKE.E              | TLSPAGAHQW                | 741 | 351 | 4.379 | 0.000 |
| splQ2A298IKATG_FRATH | Catalase-peroxidase katG K.TLSPAGAHQWAGNK.K                | TLSPAGAHQW                | 741 | 351 | 4.352 | 0.003 |
| splQ2A298IKATG_FRATH | Catalase-peroxidase katG K.TLSPAGAHQWTAGNK.K               | TLSPAGAHQWT               | 741 | 352 | 4.384 | 0.000 |
| splQ2A298IKATG_FRATH | Catalase-peroxidase katG K.TLSPAGAHQWTAGNKK.E              | TLSPAGAHQWT               | 741 | 352 | 4.31  | 0.000 |
| splQ2A298IKATG_FRATH | Catalase-peroxidase katG K.TLSPAGAHQWTPAGNK.K              | TLSPAGAHQWTP              | 741 | 353 | 4.462 | 0.000 |
| splQ2A298IKATG_FRATH | Catalase-peroxidase katG K.TLSPAGAHQWTPAGNKK.E             | TLSPAGAHQWTP              | 741 | 353 | 4.411 | 0.000 |
| splQ2A298IKATG_FRATH | Catalase-peroxidase katG K.TLSPAGAHQWTPTAGNKK.E            | TLSPAGAHQWTPPT            | 741 | 354 | 4.363 | 0.000 |
| splQ2A298IKATG_FRATH | Catalase-peroxidase katG K.TLSPAGAHQWTPTAGNK.K             | TLSPAGAHQWTPPT            | 741 | 354 | 4.323 | 0.000 |
| splQ2A298IKATG_FRATH | Catalase-peroxidase katG K.TLSPAGAHQWTPTNAGNK.K            | TLSPAGAHQWTPTN            | 741 | 355 | 4.28  | 0.000 |
| splQ2A298IKATG_FRATH | Catalase-peroxidase katG K.TLSPAGAHQWTPTNAGNKK.E           | TLSPAGAHQWTPTN            | 741 | 355 | 4.235 | 0.000 |
| splQ2A298IKATG_FRATH | Catalase-peroxidase katG K.TLSPAGAHQWTPTNAKPENMVAGNKK.E    | TLSPAGAHQWTPTNAKPENMV     | 741 | 362 | 2.933 | 0.000 |
| splQ2A298IKATG_FRATH | Catalase-peroxidase katG E.NMVPAGNKKE.N                    | NMVP                      | 741 | 363 | 3.089 | 0.009 |
| splQ2A298IKATG_FRATH | Catalase-peroxidase katG K.TLSPAGAHQWTPTNAKPENMVPAGNK.K    | TLSPAGAHQWTPTNAKPENMVP    | 741 | 363 | 3.17  | 0.000 |
| splQ2A298IKATG_FRATH | Catalase-peroxidase katG K.TLSPAGAHQWTPTNAKPENMVPAGNKK.E   | TLSPAGAHQWTPTNAKPENMVP    | 741 | 363 | 3.107 | 0.000 |
| splQ2A298IKATG_FRATH | Catalase-peroxidase katG K.TLSPAGAHQWTPTNAKPENMVPDAGNK.K   | TLSPAGAHQWTPTNAKPENMVDP   | 741 | 364 | 3.376 | 0.000 |
| splQ2A298IKATG_FRATH | Catalase-peroxidase katG E.NMVPDAAGNKKE.N                  | NMVPDA                    | 741 | 365 | 3.447 | 0.000 |
| splQ2A298IKATG_FRATH | Catalase-peroxidase katG E.NM+16VPDAAGNKKE.N               | NMVPDA                    | 741 | 365 | 2.968 | 0.000 |
| splQ2A298IKATG_FRATH | Catalase-peroxidase katG K.TLSPAGAHQWTPTNAKPENMVPDAAGNK.K  | TLSPAGAHQWTPTNAKPENMVDPDA | 741 | 365 | 3.554 | 0.000 |
| splQ2A298IKATG_FRATH | Catalase-peroxidase katG K.TLSPAGAHQWTPTNAKPENMVPDAAGNKK.E | TLSPAGAHQWTPTNAKPENMVDPDA | 741 | 365 | 3.512 | 0.000 |
| splQ2A298IKATG_FRATH | Catalase-peroxidase katG E.NMVPDAHAGNKKE.E                 | NMVPDAH                   | 741 | 366 | 4.156 | 0.009 |
| splQ2A298IKATG_FRATH | Catalase-peroxidase katG E.NMVPDAHAGNKKE.N                 | NMVPDAH                   | 741 | 366 | 3.777 | 0.000 |
| splQ2A298IKATG_FRATH | Catalase-peroxidase katG E.NM+16VPDAHAGNKKE.N              | NMVPDAH                   | 741 | 366 | 3.609 | 0.000 |
| splQ2A298IKATG_FRATH | Catalase-peroxidase katG E.NMVPDAHAGNK.K                   | NMVPDAH                   | 741 | 366 | 3.579 | 0.004 |
| splQ2A298IKATG_FRATH | Catalase-peroxidase katG E.NM+16VPDAHAGNK.K                | NMVPDAH                   | 741 | 366 | 3.06  | 0.004 |
| splQ2A298IKATG_FRATH | Catalase-peroxidase katG E.NMVPDAHAGNKKE.N                 | NMVPDAHK                  | 741 | 367 | 3.827 | 0.002 |
| splQ2A298IKATG_FRATH | Catalase-peroxidase katG E.NMVPDAHAGNK.K                   | NMVPDAHK                  | 741 | 367 | 2.865 | 0.003 |

**Table S2.** Junction peptides identified by MudPIT-LC-MS-MS analysis of *F. tularensis* tmRNA- tagged proteins.

|                      |                          |                                    |                           |     |     |       |       |
|----------------------|--------------------------|------------------------------------|---------------------------|-----|-----|-------|-------|
| splQ2A298IKATG_FRATH | Catalase-peroxidase katG | K.HKPIMFTAGNK.K                    | HKPIMFT                   | 741 | 378 | 3.893 | 0.000 |
| splQ2A298IKATG_FRATH | Catalase-peroxidase katG | K.HKPIMFTAGNKK.E                   | HKPIMFT                   | 741 | 378 | 3.838 | 0.000 |
| splQ2A298IKATG_FRATH | Catalase-peroxidase katG | K.HKPIM+16FTAGNKK.E                | HKPIMFT                   | 741 | 378 | 3.049 | 0.000 |
| splQ2A298IKATG_FRATH | Catalase-peroxidase katG | K.HKPIM+16FTAGNK.K                 | HKPIMFT                   | 741 | 378 | 2.092 | 0.008 |
| splQ2A298IKATG_FRATH | Catalase-peroxidase katG | K.HKPIMFTTAGNKK.E                  | HKPIMFTT                  | 741 | 379 | 4.081 | 0.000 |
| splQ2A298IKATG_FRATH | Catalase-peroxidase katG | K.HKPIM+16FTTAGNKK.E               | HKPIMFTT                  | 741 | 379 | 2.194 | 0.000 |
| splQ2A298IKATG_FRATH | Catalase-peroxidase katG | K.HKPIMFTTDAGNK.K                  | HKPIMFTTD                 | 741 | 380 | 4.35  | 0.000 |
| splQ2A298IKATG_FRATH | Catalase-peroxidase katG | K.HKPIMFTTDAGNKK.E                 | HKPIMFTTD                 | 741 | 380 | 4.297 | 0.000 |
| splQ2A298IKATG_FRATH | Catalase-peroxidase katG | K.HKPIM+16FTTDAGNKK.E              | HKPIMFTTD                 | 741 | 380 | 3.24  | 0.000 |
| splQ2A298IKATG_FRATH | Catalase-peroxidase katG | K.HKPIMFTTDLAGNK.K                 | HKPIMFTTDL                | 741 | 381 | 4.3   | 0.000 |
| splQ2A298IKATG_FRATH | Catalase-peroxidase katG | K.HKPIMFTTDLAGNKK.E                | HKPIMFTTDL                | 741 | 381 | 3     | 0.000 |
| splQ2A298IKATG_FRATH | Catalase-peroxidase katG | K.HKPIMFTTDLAAGNK.K                | HKPIMFTTDLA               | 741 | 382 | 4.073 | 0.002 |
| splQ2A298IKATG_FRATH | Catalase-peroxidase katG | K.HKPIMFTTDLALKEDAGNKK.E           | HKPIMFTTDLALKED           | 741 | 386 | 3.268 | 0.001 |
| splQ2A298IKATG_FRATH | Catalase-peroxidase katG | K.HKPIMFTTDLALKEDDAGNKK.E          | HKPIMFTTDLALKEDD          | 741 | 387 | 3.153 | 0.002 |
| splQ2A298IKATG_FRATH | Catalase-peroxidase katG | D.LALKEDDAGNKK.E                   | LALKEDD                   | 741 | 387 | 3.736 | 0.000 |
| splQ2A298IKATG_FRATH | Catalase-peroxidase katG | K.HKPIMFTTDLALKEDDGAGNKK.E         | HKPIMFTTDLALKEDDG         | 741 | 388 | 3.691 | 0.000 |
| splQ2A298IKATG_FRATH | Catalase-peroxidase katG | K.HKPIMFTTDLALKEDDGAGNK.K          | HKPIMFTTDLALKEDDG         | 741 | 388 | 3.518 | 0.000 |
| splQ2A298IKATG_FRATH | Catalase-peroxidase katG | D.LALKEDDGAGNKK.E                  | LALKEDDG                  | 741 | 388 | 3.895 | 0.000 |
| splQ2A298IKATG_FRATH | Catalase-peroxidase katG | K.HKPIMFTTDLALKEDDGFAGNKK.E        | HKPIMFTTDLALKEDDGF        | 741 | 389 | 3.477 | 0.000 |
| splQ2A298IKATG_FRATH | Catalase-peroxidase katG | K.HKPIM+16FTTDLALKEDDGFAGNKK.E     | HKPIMFTTDLALKEDDGF        | 741 | 389 | 3.152 | 0.000 |
| splQ2A298IKATG_FRATH | Catalase-peroxidase katG | D.LALKEDDGFAGNKK.E                 | LALKEDDGF                 | 741 | 389 | 4.356 | 0.000 |
| splQ2A298IKATG_FRATH | Catalase-peroxidase katG | E.DDGFNKAGNKK.E                    | DDGFNK                    | 741 | 391 | 2.781 | 0.008 |
| splQ2A298IKATG_FRATH | Catalase-peroxidase katG | D.LALKEDDGFNKAGNKK.E               | LALKEDDGFNK               | 741 | 391 | 4.132 | 0.000 |
| splQ2A298IKATG_FRATH | Catalase-peroxidase katG | K.HKPIMFTTDLALKEDDGFNKYQAGNKK.E    | HKPIMFTTDLALKEDDGFNKYTQ   | 741 | 394 | 2.823 | 0.001 |
| splQ2A298IKATG_FRATH | Catalase-peroxidase katG | K.HKPIM+16FTTDLALKEDDGFNKYQAGNKK.E | HKPIMFTTDLALKEDDGFNKYTQ   | 741 | 394 | 2.295 | 0.005 |
| splQ2A298IKATG_FRATH | Catalase-peroxidase katG | K.HKPIMFTTDLALKEDDGFNKYTQEFAGNK.K  | HKPIMFTTDLALKEDDGFNKYTQEF | 741 | 396 | 2.347 | 0.000 |
| splQ2A298IKATG_FRATH | Catalase-peroxidase katG | K.YTQEFYNNAGNKK.E                  | YTQEFYNN                  | 741 | 399 | 3.893 | 0.000 |
| splQ2A298IKATG_FRATH | Catalase-peroxidase katG | E.FYNNPAGNKKENR.V                  | FYNNP                     | 741 | 400 | 4.004 | 0.009 |
| splQ2A298IKATG_FRATH | Catalase-peroxidase katG | E.FYNNPAGNKK.E                     | FYNNP                     | 741 | 400 | 3.777 | 0.000 |
| splQ2A298IKATG_FRATH | Catalase-peroxidase katG | E.FYNNPAGNKK.E                     | FYNNP                     | 741 | 400 | 3.711 | 0.002 |
| splQ2A298IKATG_FRATH | Catalase-peroxidase katG | K.YTQEFYNNPAGNKK.E                 | YTQEFYNNP                 | 741 | 400 | 3.953 | 0.000 |
| splQ2A298IKATG_FRATH | Catalase-peroxidase katG | E.FYNNPEEFAGNKK.E                  | FYNNPEEF                  | 741 | 403 | 4.169 | 0.005 |
| splQ2A298IKATG_FRATH | Catalase-peroxidase katG | E.FYNNPEEFAGNKKENR.V               | FYNNPEEF                  | 741 | 403 | 2.891 | 0.003 |

**Table S2.** Junction peptides identified by MudPIT-LC-MS-MS analysis of *F. tularensis* tmRNA- tagged proteins.

|                      |                                                   |                    |     |     |       |       |
|----------------------|---------------------------------------------------|--------------------|-----|-----|-------|-------|
| splQ2A298IKATG_FRATH | Catalase-peroxidase katG E.FYNNPEEFKAGNKKE.N      | FYNNPEEFK          | 741 | 404 | 4.189 | 0.009 |
| splQ2A298IKATG_FRATH | Catalase-peroxidase katG E.FYNNPEEFKAGNKK.E       | FYNNPEEFK          | 741 | 404 | 3.891 | 0.000 |
| splQ2A298IKATG_FRATH | Catalase-peroxidase katG E.FYNNPEEFKAGNKKENR.V    | FYNNPEEFK          | 741 | 404 | 3.279 | 0.008 |
| splQ2A298IKATG_FRATH | Catalase-peroxidase katG K.YTQEFYNNPEEFKAGNK.K    | YTQEFYNNPEEFK      | 741 | 404 | 4.2   | 0.000 |
| splQ2A298IKATG_FRATH | Catalase-peroxidase katG R.YIGPWIPAGNKK.E         | YIGPWIP            | 741 | 431 | 4.227 | 0.000 |
| splQ2A298IKATG_FRATH | Catalase-peroxidase katG R.YIGPWIPAGNK.K          | YIGPWIP            | 741 | 431 | 4.014 | 0.000 |
| splQ2A298IKATG_FRATH | Catalase-peroxidase katG R.YIGPWIPAGNKKE.N        | YIGPWIP            | 741 | 431 | 2.397 | 0.008 |
| splQ2A298IKATG_FRATH | Catalase-peroxidase katG R.YIGPWIPQAGNKK.E        | YIGPWIPQ           | 741 | 433 | 4.498 | 0.000 |
| splQ2A298IKATG_FRATH | Catalase-peroxidase katG R.YIGPWIPQAGNK.K         | YIGPWIPQ           | 741 | 433 | 3.519 | 0.002 |
| splQ2A298IKATG_FRATH | Catalase-peroxidase katG R.YIGPWIPQAGNKK.E        | YIGPWIPQN          | 741 | 434 | 4.545 | 0.000 |
| splQ2A298IKATG_FRATH | Catalase-peroxidase katG R.YIGPWIPQNFAGNK.K       | YIGPWIPQNF         | 741 | 435 | 3.903 | 0.008 |
| splQ2A298IKATG_FRATH | Catalase-peroxidase katG R.YIGPWIPQNFAGNK.K       | YIGPWIPQNF         | 741 | 436 | 4.63  | 0.000 |
| splQ2A298IKATG_FRATH | Catalase-peroxidase katG R.YIGPWIPQNFAGNKKE.E     | YIGPWIPQNF         | 741 | 436 | 4.499 | 0.000 |
| splQ2A298IKATG_FRATH | Catalase-peroxidase katG R.YIGPWIPQNFAGNK.K       | YIGPWIPQNF         | 741 | 437 | 4.505 | 0.006 |
| splQ2A298IKATG_FRATH | Catalase-peroxidase katG E.QNFIWQAGNKKE.N         | QNFIWQ             | 741 | 438 | 2.926 | 0.000 |
| splQ2A298IKATG_FRATH | Catalase-peroxidase katG E.QNFIWQAGNKKE.E         | QNFIWQ             | 741 | 438 | 2.833 | 0.005 |
| splQ2A298IKATG_FRATH | Catalase-peroxidase katG R.YIGPWIPQNFQAGNK.K      | YIGPWIPQNFQ        | 741 | 438 | 3.333 | 0.000 |
| splQ2A298IKATG_FRATH | Catalase-peroxidase katG R.YIGPWIPQNFQDAGNK.K     | YIGPWIPQNFQD       | 741 | 439 | 4.507 | 0.000 |
| splQ2A298IKATG_FRATH | Catalase-peroxidase katG R.YIGPWIPQNFQDAGNKENR.V  | YIGPWIPQNFQD       | 741 | 439 | 3.001 | 0.000 |
| splQ2A298IKATG_FRATH | Catalase-peroxidase katG R.YIGPWIPQNFQDPAAGNK.E   | YIGPWIPQNFQD       | 741 | 440 | 2.567 | 0.003 |
| splQ2A298IKATG_FRATH | Catalase-peroxidase katG E.QNFIWQDPVAGNKKE.N      | QNFIWQDPV          | 741 | 441 | 3.622 | 0.000 |
| splQ2A298IKATG_FRATH | Catalase-peroxidase katG R.YIGPWIPQNFQDPAAGNK.K   | YIGPWIPQNFQDPV     | 741 | 441 | 4.475 | 0.000 |
| splQ2A298IKATG_FRATH | Catalase-peroxidase katG R.YIGPWIPQNFQDPAAGNK.K   | YIGPWIPQNFQDPA     | 741 | 442 | 4.384 | 0.000 |
| splQ2A298IKATG_FRATH | Catalase-peroxidase katG R.YIGPWIPQNFQDPAAGNK.E   | YIGPWIPQNFQDPA     | 741 | 442 | 3.588 | 0.003 |
| splQ2A298IKATG_FRATH | Catalase-peroxidase katG D.PVPAAGNKKE.N           | PVPA               | 741 | 443 | 3.847 | 0.001 |
| splQ2A298IKATG_FRATH | Catalase-peroxidase katG R.YIGPWIPQNFQDPAAGNK.K   | YIGPWIPQNFQDPA     | 741 | 443 | 3.808 | 0.000 |
| splQ2A298IKATG_FRATH | Catalase-peroxidase katG D.PVPAAGNKKE.N           | PVPA               | 741 | 444 | 4.198 | 0.000 |
| splQ2A298IKATG_FRATH | Catalase-peroxidase katG E.QNFIWQDPVPAAGNKKE.N    | QNFIWQDPVPA        | 741 | 444 | 3.945 | 0.000 |
| splQ2A298IKATG_FRATH | Catalase-peroxidase katG R.YIGPWIPQNFQDPAAGNK.K   | YIGPWIPQNFQDPVPA   | 741 | 444 | 4.34  | 0.000 |
| splQ2A298IKATG_FRATH | Catalase-peroxidase katG D.PVPAADAGNKKE.E         | PVPAAD             | 741 | 445 | 4.159 | 0.000 |
| splQ2A298IKATG_FRATH | Catalase-peroxidase katG D.PVPAADAGNKKE.N         | PVPAAD             | 741 | 445 | 4.022 | 0.000 |
| splQ2A298IKATG_FRATH | Catalase-peroxidase katG D.PVPAADAGNK.K           | PVPAAD             | 741 | 445 | 2.415 | 0.000 |
| splQ2A298IKATG_FRATH | Catalase-peroxidase katG R.YIGPWIPQNFQDPAADAGNK.K | YIGPWIPQNFQDPVPAAD | 741 | 445 | 3.924 | 0.005 |

**Table S2.** Junction peptides identified by MudPIT-LC-MS-MS analysis of *F. tularensis* tmRNA- tagged proteins.

|                      |                                                            |                          |     |     |       |       |
|----------------------|------------------------------------------------------------|--------------------------|-----|-----|-------|-------|
| splQ2A298IKATG_FRATH | Catalase-peroxidase katG R.YIGWPEQNFQWQDPVPAADAGNKK.E      | YIGWPEQNFQWQDPVPAAD      | 741 | 445 | 3.233 | 0.000 |
| splQ2A298IKATG_FRATH | Catalase-peroxidase katG D.PVPAADYAGNKK.E                  | PVPAADY                  | 741 | 446 | 3.946 | 0.008 |
| splQ2A298IKATG_FRATH | Catalase-peroxidase katG E.QNFIWQDPVPAADYKQVSAGNKK.E       | QNFIWQDPVPAADYKQVS       | 741 | 450 | 2.861 | 0.000 |
| splQ2A298IKATG_FRATH | Catalase-peroxidase katG K.QVSTQDIAQLAGNKK.E               | QVSTQDIAQL               | 741 | 457 | 2.88  | 0.001 |
| splQ2A298IKATG_FRATH | Catalase-peroxidase katG K.QVSTQDIAQLEQDIAGNKK.E           | QVSTQDIAQLEQDII          | 741 | 462 | 2.363 | 0.001 |
| splQ2A298IKATG_FRATH | Catalase-peroxidase katG K.QVSTQDIAQLEQDIINSGAGNKK.E       | QVSTQDIAQLEQDIINSG       | 741 | 465 | 2.681 | 0.000 |
| splQ2A298IKATG_FRATH | Catalase-peroxidase katG E.QDIINSGLTAGNKK.E                | QDIINSGLT                | 741 | 467 | 3.384 | 0.009 |
| splQ2A298IKATG_FRATH | Catalase-peroxidase katG E.QDIINSGLTNAGNKK.E               | QDIINSGLTN               | 741 | 468 | 3.058 | 0.001 |
| splQ2A298IKATG_FRATH | Catalase-peroxidase katG E.QDIINSGLTNQQLAGNKK.E            | QDIINSGLTNQQL            | 741 | 471 | 3.641 | 0.002 |
| splQ2A298IKATG_FRATH | Catalase-peroxidase katG E.QDIINSGLTNQQLIAGNKK.E           | QDIINSGLTNQQLI           | 741 | 472 | 3.963 | 0.002 |
| splQ2A298IKATG_FRATH | Catalase-peroxidase katG E.QDIINSGLTNQQLIKAGNKK.E          | QDIINSGLTNQQLIK          | 741 | 473 | 2.534 | 0.005 |
| splQ2A298IKATG_FRATH | Catalase-peroxidase katG E.QDIINSGLTNQQLIKTAGNKK.E         | QDIINSGLTNQQLIKT         | 741 | 474 | 2.811 | 0.001 |
| splQ2A298IKATG_FRATH | Catalase-peroxidase katG E.QDIINSGLTNQQLIKTAAGNKK.E        | QDIINSGLTNQQLIKTA        | 741 | 475 | 2.642 | 0.001 |
| splQ2A298IKATG_FRATH | Catalase-peroxidase katG E.QDIINSGLTNQQLIKTAWDSAGNKK.E     | QDIINSGLTNQQLIKTAWDS     | 741 | 478 | 2.801 | 0.000 |
| splQ2A298IKATG_FRATH | Catalase-peroxidase katG E.QDIINSGLTNQQLIKTAWDSASAGNKK.E   | QDIINSGLTNQQLIKTAWDSAS   | 741 | 480 | 2.666 | 0.000 |
| splQ2A298IKATG_FRATH | Catalase-peroxidase katG K.TAWDSASAGNKK.E                  | TAWDSAS                  | 741 | 480 | 2.467 | 0.000 |
| splQ2A298IKATG_FRATH | Catalase-peroxidase katG E.QDIINSGLTNQQLIKTAWDSASTAGNKK.E  | QDIINSGLTNQQLIKTAWDSAST  | 741 | 481 | 2.305 | 0.000 |
| splQ2A298IKATG_FRATH | Catalase-peroxidase katG K.TAWDSASTAGNKK.E                 | TAWDSAST                 | 741 | 481 | 4.115 | 0.000 |
| splQ2A298IKATG_FRATH | Catalase-peroxidase katG E.QDIINSGLTNQQLIKTAWDSASTYAGNKK.E | QDIINSGLTNQQLIKTAWDSASTY | 741 | 482 | 2.471 | 0.000 |
| splQ2A298IKATG_FRATH | Catalase-peroxidase katG R.IALAPEKAGNKK.E                  | IALAPEK                  | 741 | 502 | 3.542 | 0.009 |
| splQ2A298IKATG_FRATH | Catalase-peroxidase katG R.IALAPEKDAGNKK.E                 | IALAPEKD                 | 741 | 503 | 4.087 | 0.001 |
| splQ2A298IKATG_FRATH | Catalase-peroxidase katG R.IALAPEKDWAGNKK.E                | IALAPEKDW                | 741 | 504 | 4.378 | 0.009 |
| splQ2A298IKATG_FRATH | Catalase-peroxidase katG R.IALAPEKDWAGNKKENR.V             | IALAPEKDW                | 741 | 504 | 3.71  | 0.000 |
| splQ2A298IKATG_FRATH | Catalase-peroxidase katG R.IALAPEKDWQAGNKK.E               | IALAPEKDWQ               | 741 | 505 | 3.652 | 0.000 |
| splQ2A298IKATG_FRATH | Catalase-peroxidase katG R.IALAPEKDWQMNEAGNKK.E            | IALAPEKDWQMNE            | 741 | 508 | 3.162 | 0.001 |
| splQ2A298IKATG_FRATH | Catalase-peroxidase katG R.IALAPEKDWQMNEPAGNKK.E           | IALAPEKDWQMNEP           | 741 | 509 | 4.158 | 0.000 |
| splQ2A298IKATG_FRATH | Catalase-peroxidase katG R.IALAPEKDWQMNEPAKLEAGNKK.E       | IALAPEKDWQMNEPAKLE       | 741 | 513 | 3.374 | 0.003 |
| splQ2A298IKATG_FRATH | Catalase-peroxidase katG R.IALAPEKDWQMNEPAKLEVAGNKK.E      | IALAPEKDWQMNEPAKLEV      | 741 | 514 | 3.161 | 0.000 |
| splQ2A298IKATG_FRATH | Catalase-peroxidase katG R.IALAPEKDWQM+16NEPAKLEVAGNKK.E   | IALAPEKDWQMNEPAKLEV      | 741 | 514 | 2.562 | 0.000 |
| splQ2A298IKATG_FRATH | Catalase-peroxidase katG R.IALAPEKDWQMNEPAKLEVAGNKK.E      | IALAPEKDWQMNEPAKLEV      | 741 | 515 | 3.552 | 0.000 |
| splQ2A298IKATG_FRATH | Catalase-peroxidase katG R.IALAPEKDWQMNEPAKLEVVLAGNKK.E    | IALAPEKDWQMNEPAKLEVVL    | 741 | 516 | 3.447 | 0.000 |
| splQ2A298IKATG_FRATH | Catalase-peroxidase katG K.LEVVLAGNKK.E                    | LEVVL                    | 741 | 516 | 3.07  | 0.002 |
| splQ2A298IKATG_FRATH | Catalase-peroxidase katG E.IQTNFAGNKK.E                    | IQTNF                    | 741 | 526 | 3.625 | 0.004 |

**Table S2.** Junction peptides identified by MudPIT-LC-MS-MS analysis of *F. tularensis* tmRNA- tagged proteins.

|                      |                                                          |                      |     |     |       |       |
|----------------------|----------------------------------------------------------|----------------------|-----|-----|-------|-------|
| splQ2A298IKATG_FRATH | Catalase-peroxidase katG K.LKEIQTNFAGNKK.E               | LKEIQTNF             | 741 | 526 | 3.93  | 0.000 |
| splQ2A298IKATG_FRATH | Catalase-peroxidase katG K.LKEIQTNFAGNK.K                | LKEIQTNF             | 741 | 526 | 3.902 | 0.001 |
| splQ2A298IKATG_FRATH | Catalase-peroxidase katG E.IQTNFNAGNKK.E.N               | IQTNFN               | 741 | 527 | 3.821 | 0.005 |
| splQ2A298IKATG_FRATH | Catalase-peroxidase katG E.IQTNFNAGNKKENR.V              | IQTNFN               | 741 | 527 | 3.264 | 0.003 |
| splQ2A298IKATG_FRATH | Catalase-peroxidase katG K.LKEIQTNFNAGNKK.E              | LKEIQTNFN            | 741 | 527 | 3.986 | 0.008 |
| splQ2A298IKATG_FRATH | Catalase-peroxidase katG E.IQTNFNAGNKK.E.N               | IQTNFN               | 741 | 528 | 3.859 | 0.003 |
| splQ2A298IKATG_FRATH | Catalase-peroxidase katG K.LKEIQTNFNAGNKK.E              | LKEIQTNFN            | 741 | 528 | 4.004 | 0.001 |
| splQ2A298IKATG_FRATH | Catalase-peroxidase katG *.EIQTNFNNSAGNKK.E              | EIQTNFNNS            | 741 | 529 | 3.325 | 0.008 |
| splQ2A298IKATG_FRATH | Catalase-peroxidase katG E.IQTNFNNSAGNKK.E.N             | IQTNFNNS             | 741 | 529 | 3.849 | 0.004 |
| splQ2A298IKATG_FRATH | Catalase-peroxidase katG E.IQTNFNNSKAGNKK.E.N            | IQTNFNNSK            | 741 | 530 | 3.861 | 0.002 |
| splQ2A298IKATG_FRATH | Catalase-peroxidase katG E.IQTNFNNSKTDAGNKK.E.N          | IQTNFNNSKTD          | 741 | 532 | 3.746 | 0.000 |
| splQ2A298IKATG_FRATH | Catalase-peroxidase katG E.IQTNFNNSKTDGAGNKK.E.N         | IQTNFNNSKTDG         | 741 | 533 | 4.177 | 0.000 |
| splQ2A298IKATG_FRATH | Catalase-peroxidase katG E.IQTNFNNSKTDGAGNKKENR.V        | IQTNFNNSKTDG         | 741 | 533 | 3.331 | 0.001 |
| splQ2A298IKATG_FRATH | Catalase-peroxidase katG E.IQTNFNNSKTDGTAGNKK.E.N        | IQTNFNNSKTDGT        | 741 | 534 | 4.108 | 0.000 |
| splQ2A298IKATG_FRATH | Catalase-peroxidase katG E.IQTNFNNSKTDGTAGNKKENR.V       | IQTNFNNSKTDGT        | 741 | 534 | 3.13  | 0.000 |
| splQ2A298IKATG_FRATH | Catalase-peroxidase katG E.IQTNFNNSKTDGKAGNKK.E.N        | IQTNFNNSKTDGK        | 741 | 535 | 2.778 | 0.000 |
| splQ2A298IKATG_FRATH | Catalase-peroxidase katG E.IQTNFNNSKTDGKTVAGNKK.E.N      | IQTNFNNSKTDGKTV      | 741 | 536 | 4.088 | 0.003 |
| splQ2A298IKATG_FRATH | Catalase-peroxidase katG E.IQTNFNNSKTDGKTVSAGNKK.E.N     | IQTNFNNSKTDGKTVS     | 741 | 537 | 3.209 | 0.000 |
| splQ2A298IKATG_FRATH | Catalase-peroxidase katG E.IQTNFNNSKTDGKTVSLAGNKK.E.N    | IQTNFNNSKTDGKTVSL    | 741 | 538 | 2.814 | 0.003 |
| splQ2A298IKATG_FRATH | Catalase-peroxidase katG E.IQTNFNNSKTDGKTVSLAAGNKK.E.N   | IQTNFNNSKTDGKTVSLA   | 741 | 539 | 3.277 | 0.002 |
| splQ2A298IKATG_FRATH | Catalase-peroxidase katG K.VSLAAGNKK.E                   | VSLA                 | 741 | 539 | 2.851 | 0.006 |
| splQ2A298IKATG_FRATH | Catalase-peroxidase katG E.IQTNFNNSKTDGKTVSLADLAGNKK.E.N | IQTNFNNSKTDGKTVSLADL | 741 | 541 | 3.268 | 0.000 |
| splQ2A298IKATG_FRATH | Catalase-peroxidase katG K.VSLADLAGNKK.E                 | VSLADL               | 741 | 541 | 3.733 | 0.003 |
| splQ2A298IKATG_FRATH | Catalase-peroxidase katG K.VSLADLIVAGNKK.E               | VSLADLIV             | 741 | 543 | 4.24  | 0.001 |
| splQ2A298IKATG_FRATH | Catalase-peroxidase katG K.VSLADLIVLAGNKK.E              | VSLADLIVL            | 741 | 544 | 4.341 | 0.009 |
| splQ2A298IKATG_FRATH | Catalase-peroxidase katG K.VSLADLIVLAGNK.K               | VSLADLIVL            | 741 | 544 | 3.055 | 0.006 |
| splQ2A298IKATG_FRATH | Catalase-peroxidase katG K.VSLADLIVLAGNKK.E              | VSLADLIVLG           | 741 | 545 | 4.356 | 0.001 |
| splQ2A298IKATG_FRATH | Catalase-peroxidase katG D.LIVLGGAGNKK.E.N               | LIVLGG               | 741 | 546 | 4.069 | 0.002 |
| splQ2A298IKATG_FRATH | Catalase-peroxidase katG K.VSLADLIVLGGAGNKK.E            | VSLADLIVLGG          | 741 | 546 | 4.205 | 0.001 |
| splQ2A298IKATG_FRATH | Catalase-peroxidase katG D.LIVLGGNAGNKK.E.N              | LIVLGGN              | 741 | 547 | 4.123 | 0.000 |
| splQ2A298IKATG_FRATH | Catalase-peroxidase katG K.VSLADLIVLGGNAGNKK.E           | VSLADLIVLGGN         | 741 | 547 | 4.409 | 0.000 |
| splQ2A298IKATG_FRATH | Catalase-peroxidase katG D.LIVLGGNVAGNKK.E.N             | LIVLGGNV             | 741 | 548 | 3.206 | 0.000 |
| splQ2A298IKATG_FRATH | Catalase-peroxidase katG K.VSLADLIVLGGNVAGNKK.E          | VSLADLIVLGGNV        | 741 | 548 | 4.488 | 0.000 |



**Table S2.** Junction peptides identified by MudPIT-LC-MS-MS analysis of *F. tularensis* tmRNA- tagged proteins.

|                      |                          |                                    |                          |     |     |       |       |
|----------------------|--------------------------|------------------------------------|--------------------------|-----|-----|-------|-------|
| splQ2A298IKATG_FRATH | Catalase-peroxidase katG | K.VSLADLIVLGGNVAGNK.K              | VSLADLIVLGGNV            | 741 | 548 | 4.163 | 0.000 |
| splQ2A298IKATG_FRATH | Catalase-peroxidase katG | K.VSLADLIVLGGNVGAGNK.K             | VSLADLIVLGGNVG           | 741 | 549 | 3.422 | 0.000 |
| splQ2A298IKATG_FRATH | Catalase-peroxidase katG | K.VSLADLIVLGGNVGVAGNKK.E           | VSLADLIVLGGNVGV          | 741 | 550 | 4.472 | 0.000 |
| splQ2A298IKATG_FRATH | Catalase-peroxidase katG | K.VSLADLIVLGGNVGVAGNK.K            | VSLADLIVLGGNVGV          | 741 | 550 | 4.039 | 0.000 |
| splQ2A298IKATG_FRATH | Catalase-peroxidase katG | K.VSLADLIVLGGNVGVEQAGNKK.E         | VSLADLIVLGGNVGVEQ        | 741 | 552 | 4.386 | 0.002 |
| splQ2A298IKATG_FRATH | Catalase-peroxidase katG | K.VSLADLIVLGGNVGVEQAAAGNK.K        | VSLADLIVLGGNVGVEQAA      | 741 | 554 | 3.942 | 0.000 |
| splQ2A298IKATG_FRATH | Catalase-peroxidase katG | E.QAAKQAGYNIAGNKKE.N               | QAAKQAGYNI               | 741 | 561 | 2.533 | 0.001 |
| splQ2A298IKATG_FRATH | Catalase-peroxidase katG | E.QAAKQAGYNIQAGNKKE.N              | QAAKQAGYNIQ              | 741 | 562 | 2.706 | 0.008 |
| splQ2A298IKATG_FRATH | Catalase-peroxidase katG | K.QAGYNIQMPFAGNK.K                 | QAGYNIQMPF               | 741 | 565 | 2.708 | 0.000 |
| splQ2A298IKATG_FRATH | Catalase-peroxidase katG | K.QAGYNIQMPFVAGNKK.E               | QAGYNIQMPFV              | 741 | 566 | 3.187 | 0.000 |
| splQ2A298IKATG_FRATH | Catalase-peroxidase katG | K.QAGYNIQMPFVPGAGNK.K              | QAGYNIQMPFVPG            | 741 | 568 | 3.349 | 0.000 |
| splQ2A298IKATG_FRATH | Catalase-peroxidase katG | R.TDATQAQTAGNKK.E                  | TDATQAQT                 | 741 | 577 | 3.55  | 0.008 |
| splQ2A298IKATG_FRATH | Catalase-peroxidase katG | R.TDATQAQTDAGNKK.E                 | TDATQAQTD                | 741 | 578 | 3.883 | 0.002 |
| splQ2A298IKATG_FRATH | Catalase-peroxidase katG | R.TDATQAQTDAGNKKENR.V              | TDATQAQTD                | 741 | 578 | 3.568 | 0.003 |
| splQ2A298IKATG_FRATH | Catalase-peroxidase katG | E.SFNYLKTAGNKKE.N                  | SFNYLKT                  | 741 | 587 | 3.959 | 0.000 |
| splQ2A298IKATG_FRATH | Catalase-peroxidase katG | E.SFNYLKTSDAGNKKE.N                | SFNYLKTSD                | 741 | 590 | 4.178 | 0.000 |
| splQ2A298IKATG_FRATH | Catalase-peroxidase katG | E.SFNYLKTSDGAGNKKE.N               | SFNYLKTSDG               | 741 | 591 | 4.094 | 0.000 |
| splQ2A298IKATG_FRATH | Catalase-peroxidase katG | K.SDGFAGNKK.E                      | SDGF                     | 741 | 592 | 3.428 | 0.001 |
| splQ2A298IKATG_FRATH | Catalase-peroxidase katG | E.SFNYLKTSDGFAGNKKE.N              | SFNYLKTSDGF              | 741 | 592 | 3.047 | 0.000 |
| splQ2A298IKATG_FRATH | Catalase-peroxidase katG | K.TKSDGFAGNKK.E                    | TKSDGF                   | 741 | 592 | 3.272 | 0.000 |
| splQ2A298IKATG_FRATH | Catalase-peroxidase katG | K.SDGFINAGNKK.E                    | SDGFIN                   | 741 | 594 | 4.033 | 0.000 |
| splQ2A298IKATG_FRATH | Catalase-peroxidase katG | K.TKSDGFINAGNKK.E                  | TKSDGFIN                 | 741 | 594 | 3.915 | 0.000 |
| splQ2A298IKATG_FRATH | Catalase-peroxidase katG | K.TKSDGFINYAGNKK.E                 | TKSDGFINY                | 741 | 595 | 3.711 | 0.004 |
| splQ2A298IKATG_FRATH | Catalase-peroxidase katG | E.SFNYLKTSDGFINYTDGAGNKKE.N        | SFNYLKTSDGFINYTDG        | 741 | 598 | 3.52  | 0.000 |
| splQ2A298IKATG_FRATH | Catalase-peroxidase katG | E.SFNYLKTSDGFINYTDGSIAGNKKE.N      | SFNYLKTSDGFINYTDGSI      | 741 | 600 | 3.513 | 0.006 |
| splQ2A298IKATG_FRATH | Catalase-peroxidase katG | E.SFNYLKTSDGFINYTDGSIAGNK.K        | SFNYLKTSDGFINYTDGSI      | 741 | 600 | 3.104 | 0.000 |
| splQ2A298IKATG_FRATH | Catalase-peroxidase katG | E.SFNYLKTSDGFINYTDGSISAAGNKKE.N    | SFNYLKTSDGFINYTDGSISA    | 741 | 602 | 3.518 | 0.003 |
| splQ2A298IKATG_FRATH | Catalase-peroxidase katG | E.SFNYLKTSDGFINYTDGSISADAGNKKE.N   | SFNYLKTSDGFINYTDGSISAD   | 741 | 603 | 3.633 | 0.000 |
| splQ2A298IKATG_FRATH | Catalase-peroxidase katG | E.SFNYLKTSDGFINYTDGSISADKLAGNKKE.N | SFNYLKTSDGFINYTDGSISADKL | 741 | 605 | 3.197 | 0.000 |
| splQ2A298IKATG_FRATH | Catalase-peroxidase katG | K.SDGFINYTDGSISADKLPQTLAGNKK.E     | SDGFINYTDGSISADKLPQTL    | 741 | 609 | 3.548 | 0.000 |
| splQ2A298IKATG_FRATH | Catalase-peroxidase katG | K.LPQTLVAGNK.K                     | LPQTLV                   | 741 | 610 | 4.094 | 0.009 |
| splQ2A298IKATG_FRATH | Catalase-peroxidase katG | K.TKSDGFINYTDGSISADKLPQTLVAGNKK.E  | TKSDGFINYTDGSISADKLPQTLV | 741 | 610 | 3.745 | 0.000 |
| splQ2A298IKATG_FRATH | Catalase-peroxidase katG | K.ASMLDLNIPAGNKK.E                 | ASMLDLNIP                | 741 | 621 | 4.051 | 0.000 |

**Table S2.** Junction peptides identified by MudPIT-LC-MS-MS analysis of *F. tularensis* tmRNA- tagged proteins.

|                      |                            |                                  |                        |     |     |       |       |
|----------------------|----------------------------|----------------------------------|------------------------|-----|-----|-------|-------|
| splQ2A298IKATG_FRATH | Catalase-peroxidase katG   | E.MTVLVGGAGNKKE.N                | MTVLVGG                | 741 | 629 | 3.982 | 0.000 |
| splQ2A298IKATG_FRATH | Catalase-peroxidase katG   | E.M+16TVLVGGAGNKKE.N             | MTVLVGG                | 741 | 629 | 3.027 | 0.000 |
| splQ2A298IKATG_FRATH | Catalase-peroxidase katG   | E.GVLTTTPAGNKKE.N                | GVLTTTP                | 741 | 649 | 3.921 | 0.000 |
| splQ2A298IKATG_FRATH | Catalase-peroxidase katG   | E.GVLTTTPAGNKK.E                 | GVLTTTP                | 741 | 649 | 2.121 | 0.008 |
| splQ2A298IKATG_FRATH | Catalase-peroxidase katG   | E.GVLTTTPGAGNKKE.N               | GVLTTTPG               | 741 | 650 | 3.429 | 0.001 |
| splQ2A298IKATG_FRATH | Catalase-peroxidase katG   | E.GVLTTTPGQAGNKKE.N              | GVLTTTPGQ              | 741 | 651 | 4.01  | 0.000 |
| splQ2A298IKATG_FRATH | Catalase-peroxidase katG   | E.GVLTTTPGQAGNKK.E               | GVLTTTPGQ              | 741 | 651 | 2.323 | 0.001 |
| splQ2A298IKATG_FRATH | Catalase-peroxidase katG   | E.GVLTTTPGQLAGNKKE.N             | GVLTTTPGQL             | 741 | 652 | 4.237 | 0.000 |
| splQ2A298IKATG_FRATH | Catalase-peroxidase katG   | E.GVLTTTPGQLAGNKK.E              | GVLTTTPGQL             | 741 | 652 | 3.196 | 0.000 |
| splQ2A298IKATG_FRATH | Catalase-peroxidase katG   | E.GVLTTTPGQLAGNK.K               | GVLTTTPGQL             | 741 | 652 | 2.859 | 0.002 |
| splQ2A298IKATG_FRATH | Catalase-peroxidase katG   | E.GVLTTTPGQLNAGNKK.E             | GVLTTTPGQLN            | 741 | 653 | 4.199 | 0.000 |
| splQ2A298IKATG_FRATH | Catalase-peroxidase katG   | E.GVLTTTPGQLNAGNKKE.N            | GVLTTTPGQLN            | 741 | 653 | 3.521 | 0.000 |
| splQ2A298IKATG_FRATH | Catalase-peroxidase katG   | E.GVLTTTPGQLNAGNKKE.N            | GVLTTTPGQLNN           | 741 | 654 | 4.152 | 0.002 |
| splQ2A298IKATG_FRATH | Catalase-peroxidase katG   | E.GVLTTTPGQLNNSAGNKKE.N          | GVLTTTPGQLNNS          | 741 | 655 | 4.165 | 0.000 |
| splQ2A298IKATG_FRATH | Catalase-peroxidase katG   | E.GVLTTTPGQLNNSFAGNKKE.N         | GVLTTTPGQLNNSF         | 741 | 656 | 4.26  | 0.000 |
| splQ2A298IKATG_FRATH | Catalase-peroxidase katG   | E.GVLTTTPGQLNNSFFAGNK.K          | GVLTTTPGQLNNSFF        | 741 | 657 | 4.38  | 0.000 |
| splQ2A298IKATG_FRATH | Catalase-peroxidase katG   | E.GVLTTTPGQLNNSFFAGNKKE.N        | GVLTTTPGQLNNSFF        | 741 | 657 | 2.29  | 0.003 |
| splQ2A298IKATG_FRATH | Catalase-peroxidase katG   | E.GVLTTTPGQLNNSFFVAGNK.K         | GVLTTTPGQLNNSFFV       | 741 | 658 | 4.36  | 0.000 |
| splQ2A298IKATG_FRATH | Catalase-peroxidase katG   | E.GVLTTTPGQLNNSFFVLLAGNK.K       | GVLTTTPGQLNNSFFVLL     | 741 | 661 | 2.79  | 0.000 |
| splQ2A298IKATG_FRATH | Catalase-peroxidase katG   | E.GVLTTTPGQLNNSFFVLLDMSTAGNKKE.N | GVLTTTPGQLNNSFFVLLDMST | 741 | 665 | 2.767 | 0.000 |
| splQ2A298IKATG_FRATH | Catalase-peroxidase katG   | K.WTASPVDLAGNKK.E                | WTASPVDL               | 741 | 696 | 3.834 | 0.000 |
| splQ2A298IKATG_FRATH | Catalase-peroxidase katG   | K.WTASPVDLIAGNKK.E               | WTASPVDLI              | 741 | 697 | 4.181 | 0.000 |
| splQ2A298IKATG_FRATH | Catalase-peroxidase katG   | K.WTASPVDLIAGNK.K                | WTASPVDLI              | 741 | 697 | 3.183 | 0.000 |
| splQ2A298IKATG_FRATH | Catalase-peroxidase katG   | K.QKWTASPVDLIFAGNKK.E            | QKWTASPVDLIF           | 741 | 698 | 2.523 | 0.000 |
| splQ2A298IKATG_FRATH | Catalase-peroxidase katG   | K.WTASPVDLIFAGNKK.E              | WTASPVDLIF             | 741 | 698 | 4.366 | 0.000 |
| splQ2A298IKATG_FRATH | Catalase-peroxidase katG   | K.WTASPVDLIFAGNK.K               | WTASPVDLIF             | 741 | 698 | 4.147 | 0.000 |
| splQ2A298IKATG_FRATH | Catalase-peroxidase katG   | K.WTASPVDLIFGSAGNK.K             | WTASPVDLIFGS           | 741 | 700 | 3.453 | 0.000 |
| splQ2A298IKATG_FRATH | Catalase-peroxidase katG   | K.FVNDFAGNKK.E                   | FVNDF                  | 741 | 724 | 3.76  | 0.004 |
| splQ2A2B1IGPMI_FRATH | 2,3-bisphosphoglycerate-   | K.TIFNFEKAGNK.K                  | TIFNFEK                | 512 | 512 | 3.277 | 0.009 |
| splQ2A2E4IRL21_FRATH | 50S ribosomal protein L2   | K.VSSISLAGNKK.E                  | VSSISL                 | 104 | 104 | 3.943 | 0.000 |
| splQ2A2J0ISYT_FRATH  | Threonyl-tRNA synthetase   | R.TPLIADFSLAGNKK.E               | TPLIADFSL              | 634 | 301 | 3.137 | 0.001 |
| splQ2A2J2IRL35_FRATH | 50S ribosomal protein L3   | K.VDTTSLVQQMPAGNKK.E             | VDTTSLVQQMP            | 65  | 63  | 4.247 | 0.000 |
| splQ2A311IDCD_FRATH  | Deoxycytidine triphosphate | E.FKIFTNINSSAGNKKE.N             | FKIFTNINSS             | 188 | 62  | 2.988 | 0.002 |

**Table S2.** Junction peptides identified by MudPIT-LC-MS-MS analysis of *F. tularensis* tmRNA- tagged proteins.

|                      |                          |                                   |                           |     |     |       |       |
|----------------------|--------------------------|-----------------------------------|---------------------------|-----|-----|-------|-------|
| splQ2A311IDCD_FRATH  | Deoxycytidine triphospha | E.GVAQMLFFAGNKKE.N                | GVAQMLFF                  | 188 | 160 | 4.095 | 0.001 |
| splQ2A311IDCD_FRATH  | Deoxycytidine triphospha | K.IYANEGVAQMLFFAGNK.K             | IYANEGVAQMLFF             | 188 | 160 | 4.237 | 0.000 |
| splQ2A311IDCD_FRATH  | Deoxycytidine triphospha | E.GVAQMLFFQSAGNKKE.N              | GVAQMLFFQS                | 188 | 162 | 4.051 | 0.000 |
| splQ2A311IDCD_FRATH  | Deoxycytidine triphospha | E.TSYADKGGKYQGQVGAGNKKE.N         | TSYADKGGKYQGQVG           | 188 | 182 | 3.125 | 0.000 |
| splQ2A311IDCD_FRATH  | Deoxycytidine triphospha | E.TSYADKGGKYQGQVGVAGNKKE.N        | TSYADKGGKYQGQVGV          | 188 | 183 | 3.333 | 0.000 |
| splQ2A311IDCD_FRATH  | Deoxycytidine triphospha | K.YQGQVGVAGNKKE.E                 | YQGQVGV                   | 188 | 183 | 3.714 | 0.000 |
| splQ2A311IDCD_FRATH  | Deoxycytidine triphospha | E.TSYADKGGKYQGQVGVTAGNKKE.N       | TSYADKGGKYQGQVGV          | 188 | 184 | 3.324 | 0.000 |
| splQ2A311IDCD_FRATH  | Deoxycytidine triphospha | K.YQGQVGVTAGNKKE.E                | YQGQVGV                   | 188 | 184 | 4.222 | 0.008 |
| splQ2A311IDCD_FRATH  | Deoxycytidine triphospha | E.TSYADKGGKYQGQVGVTLAGNKKE.N      | TSYADKGGKYQGQVGV          | 188 | 185 | 3.511 | 0.007 |
| splQ2A311IDCD_FRATH  | Deoxycytidine triphospha | K.YQGQVGVTLAGNKKE.E               | YQGQVGV                   | 188 | 185 | 4.148 | 0.000 |
| splQ2A311IDCD_FRATH  | Deoxycytidine triphospha | E.TSYADKGGKYQGQVGVTLTAGNKKE.N     | TSYADKGGKYQGQVGV          | 188 | 186 | 3.367 | 0.000 |
| splQ2A311IDCD_FRATH  | Deoxycytidine triphospha | K.YQGQVGVTLTAGNKKE.E              | YQGQVGV                   | 188 | 186 | 4.278 | 0.009 |
| splQ2A327IDNAJ_FRATH | Chaperone protein dnaJ d | R.YDQFGHAGVAGNKKE.E               | YDQFGHAGV                 | 371 | 74  | 3.905 | 0.008 |
| splQ2A327IDNAJ_FRATH | Chaperone protein dnaJ d | R.YDQFGHAGVAGNK.K                 | YDQFGHAGV                 | 371 | 74  | 2.235 | 0.006 |
| splQ2A327IDNAJ_FRATH | Chaperone protein dnaJ d | R.YDQFGHAGVNVQSGAGNK.K            | YDQFGHAGVNVQSG            | 371 | 79  | 3.591 | 0.000 |
| splQ2A328IDNAK_FRATH | Chaperone protein dnaK c | R.IIGIDLGTNSC+57LAAGNKKE.E        | IIGIDLGTNSCLA             | 642 | 17  | 2.507 | 0.005 |
| splQ2A328IDNAK_FRATH | Chaperone protein dnaK c | R.IINEPTAAALAYGAGNKKE.N           | IINEPTAAALAYG             | 642 | 182 | 3.198 | 0.002 |
| splQ2A328IDNAK_FRATH | Chaperone protein dnaK c | R.IINEPTAAALAYGVDAGNK.K           | IINEPTAAALAYGVD           | 642 | 184 | 4.184 | 0.000 |
| splQ2A328IDNAK_FRATH | Chaperone protein dnaK c | R.IINEPTAAALAYGVDAGNKKE.N         | IINEPTAAALAYGVD           | 642 | 184 | 2.535 | 0.006 |
| splQ2A328IDNAK_FRATH | Chaperone protein dnaK c | E.SLVSDLVMSLEPCAGNKKE.N           | SLVSDLVMSLEPC             | 642 | 322 | 3.34  | 0.008 |
| splQ2A328IDNAK_FRATH | Chaperone protein dnaK c | E.AVAVGAAAGNKKE.N                 | AVAVGAA                   | 642 | 378 | 4.03  | 0.003 |
| splQ2A328IDNAK_FRATH | Chaperone protein dnaK c | E.AVAVGAAIAGNKKE.N                | AVAVGAAI                  | 642 | 379 | 4.102 | 0.003 |
| splQ2A328IDNAK_FRATH | Chaperone protein dnaK c | E.AVAVGAAIQAGNKKE.N               | AVAVGAAIQ                 | 642 | 380 | 4.046 | 0.000 |
| splQ2A328IDNAK_FRATH | Chaperone protein dnaK c | E.AVAVGAAIQAGNKKE.E               | AVAVGAAIQ                 | 642 | 380 | 3.518 | 0.000 |
| splQ2A328IDNAK_FRATH | Chaperone protein dnaK c | E.AVAVGAAIQGAGNKKE.N              | AVAVGAAIQG                | 642 | 381 | 4.215 | 0.000 |
| splQ2A328IDNAK_FRATH | Chaperone protein dnaK c | E.AVAVGAAIQGGAGNKKE.N             | AVAVGAAIQGG               | 642 | 382 | 3.841 | 0.000 |
| splQ2A328IDNAK_FRATH | Chaperone protein dnaK c | R.KDVNPDEAVAVGAAIQGGVLAGAGNK.K    | KDVNPDEAVAVGAAIQGGVLAG    | 642 | 386 | 3.753 | 0.000 |
| splQ2A328IDNAK_FRATH | Chaperone protein dnaK c | R.KDVNPDEAVAVGAAIQGGVLAGDVKAGNK.K | KDVNPDEAVAVGAAIQGGVLAGDVK | 642 | 389 | 3.618 | 0.000 |
| splQ2A328IDNAK_FRATH | Chaperone protein dnaK c | E.AVAVGAAIQGGVLAGDVKAGNKKE.N      | AVAVGAAIQGGVLAGDVK        | 642 | 392 | 3.198 | 0.000 |
| splQ2A328IDNAK_FRATH | Chaperone protein dnaK c | D.VLLLDVAGNKKE.E                  | VLLLDV                    | 642 | 396 | 3.586 | 0.001 |
| splQ2A328IDNAK_FRATH | Chaperone protein dnaK c | D.VLLLDVTAGNKKE.N                 | VLLLDVT                   | 642 | 397 | 3.36  | 0.000 |
| splQ2A328IDNAK_FRATH | Chaperone protein dnaK c | K.DVLLLDVTPAGNKKE.E               | DVLLLDVTP                 | 642 | 398 | 3.357 | 0.001 |
| splQ2A328IDNAK_FRATH | Chaperone protein dnaK c | K.DVLLLDVTPSAGNKKE.E              | DVLLLDVTPS                | 642 | 400 | 2.813 | 0.003 |

**Table S2.** Junction peptides identified by MudPIT-LC-MS-MS analysis of *F. tularensis* tmRNA- tagged proteins.

|                      |                                                         |                      |     |     |       |       |
|----------------------|---------------------------------------------------------|----------------------|-----|-----|-------|-------|
| splQ2A328IDNAK_FRATH | Chaperone protein dnaK c D.VTPLSAGNKKE.N                | VTPLS                | 642 | 400 | 2.8   | 0.008 |
| splQ2A328IDNAK_FRATH | Chaperone protein dnaK c K.DVLLLDVTPLSLAGNKKE.E         | DVLLLDVTPLSL         | 642 | 401 | 4.353 | 0.000 |
| splQ2A328IDNAK_FRATH | Chaperone protein dnaK c D.VTPLSLAGNKKE.N               | VTPLSL               | 642 | 401 | 4.04  | 0.000 |
| splQ2A328IDNAK_FRATH | Chaperone protein dnaK c D.VTPLSLAGNKKE.E               | VTPLSL               | 642 | 401 | 3.987 | 0.000 |
| splQ2A328IDNAK_FRATH | Chaperone protein dnaK c D.VTPLSLGAGNKKE.N              | VTPLSLG              | 642 | 402 | 3.422 | 0.001 |
| splQ2A328IDNAK_FRATH | Chaperone protein dnaK c K.DVLLLDVTPLSLGIAGNKKE.E       | DVLLLDVTPLSLGI       | 642 | 403 | 4.429 | 0.000 |
| splQ2A328IDNAK_FRATH | Chaperone protein dnaK c K.DVLLLDVTPLSLGIAGNK.K         | DVLLLDVTPLSLGI       | 642 | 403 | 4.414 | 0.000 |
| splQ2A328IDNAK_FRATH | Chaperone protein dnaK c D.VTPLSLGIAGNKKE.N             | VTPLSLGI             | 642 | 403 | 4.278 | 0.006 |
| splQ2A328IDNAK_FRATH | Chaperone protein dnaK c D.VTPLSLGIAGNK.K               | VTPLSLGI             | 642 | 403 | 2.898 | 0.006 |
| splQ2A328IDNAK_FRATH | Chaperone protein dnaK c K.DVLLLDVTPLSLGIETMGGVAGNKKE.E | DVLLLDVTPLSLGIETMGGV | 642 | 409 | 2.546 | 0.002 |
| splQ2A328IDNAK_FRATH | Chaperone protein dnaK c E.TMGGVMTAGNKKE.N              | TMGGVMT              | 642 | 411 | 3.633 | 0.000 |
| splQ2A328IDNAK_FRATH | Chaperone protein dnaK c E.ADKKFHDLVAGNKKE.N            | ADKKFHDLV            | 642 | 535 | 4.229 | 0.000 |
| splQ2A328IDNAK_FRATH | Chaperone protein dnaK c K.FHDLVAGNKKE.E                | FHDLV                | 642 | 535 | 4.034 | 0.004 |
| splQ2A328IDNAK_FRATH | Chaperone protein dnaK c K.FHDLVAGNK.K                  | FHDLV                | 642 | 535 | 3.648 | 0.000 |
| splQ2A328IDNAK_FRATH | Chaperone protein dnaK c E.ADKKFHDLVTAGNKKE.N           | ADKKFHDLVT           | 642 | 536 | 2.891 | 0.001 |
| splQ2A328IDNAK_FRATH | Chaperone protein dnaK c K.FHDLVTAGNK.K                 | FHDLVT               | 642 | 536 | 3.683 | 0.001 |
| splQ2A328IDNAK_FRATH | Chaperone protein dnaK c K.FHDLVTAGNKKE.E               | FHDLVT               | 642 | 536 | 3.426 | 0.000 |
| splQ2A328IDNAK_FRATH | Chaperone protein dnaK c E.ADKKFHDLVTAAGNKKE.N          | ADKKFHDLVTA          | 642 | 537 | 2.786 | 0.000 |
| splQ2A328IDNAK_FRATH | Chaperone protein dnaK c K.FHDLVTAAGNKKE.E              | FHDLVTA              | 642 | 537 | 4.141 | 0.000 |
| splQ2A328IDNAK_FRATH | Chaperone protein dnaK c K.FHDLVTAAGNK.K                | FHDLVTA              | 642 | 537 | 4.098 | 0.000 |
| splQ2A328IDNAK_FRATH | Chaperone protein dnaK c R.NTADNLIHAGNKKE.E             | NTADNLIH             | 642 | 546 | 3.358 | 0.000 |
| splQ2A328IDNAK_FRATH | Chaperone protein dnaK c R.NTADNLIHSAGNK.K              | NTADNLIHS            | 642 | 547 | 3.748 | 0.000 |
| splQ2A328IDNAK_FRATH | Chaperone protein dnaK c R.NTADNLIHSAGNKKE.E            | NTADNLIHS            | 642 | 547 | 3.735 | 0.000 |
| splQ2A328IDNAK_FRATH | Chaperone protein dnaK c R.NTADNLIHSAGNKKE.N            | NTADNLIHS            | 642 | 547 | 3.412 | 0.000 |
| splQ2A328IDNAK_FRATH | Chaperone protein dnaK c R.NTADNLIHSSAGNKKE.E           | NTADNLIHSS           | 642 | 548 | 3.959 | 0.000 |
| splQ2A328IDNAK_FRATH | Chaperone protein dnaK c R.KAIQELGAGNKKE.E              | KAIQELG              | 642 | 556 | 3.899 | 0.001 |
| splQ2A328IDNAK_FRATH | Chaperone protein dnaK c E.LGDKVTAAGNKKE.N              | LGDKVTA              | 642 | 561 | 3.906 | 0.008 |
| splQ2A328IDNAK_FRATH | Chaperone protein dnaK c E.LGDKVTAAGNKKE.E              | LGDKVTA              | 642 | 561 | 2.143 | 0.000 |
| splQ2A328IDNAK_FRATH | Chaperone protein dnaK c E.AATKGDDKQAIEAAGNKKE.E        | AATKGDDKQAIEA        | 642 | 588 | 2.147 | 0.003 |
| splQ2A328IDNAK_FRATH | Chaperone protein dnaK c E.AFAPAGNKKE.N                 | AFAP                 | 642 | 599 | 3.994 | 0.001 |
| splQ2A328IDNAK_FRATH | Chaperone protein dnaK c K.ALEEFAPAGNKKE.E              | ALEEFAP              | 642 | 599 | 2     | 0.005 |
| splQ2A328IDNAK_FRATH | Chaperone protein dnaK c E.AFAPIAQAGNKKE.N              | AFAPIAQ              | 642 | 602 | 3.873 | 0.000 |
| splQ2A328IDNAK_FRATH | Chaperone protein dnaK c E.AFAPIAQAGNK.K                | AFAPIAQ              | 642 | 602 | 3.142 | 0.005 |

**Table S2.** Junction peptides identified by MudPIT-LC-MS-MS analysis of *F. tularensis* tmRNA- tagged proteins.

|                      |                                                          |                           |     |     |       |       |
|----------------------|----------------------------------------------------------|---------------------------|-----|-----|-------|-------|
| splQ2A328IDNAK_FRATH | Chaperone protein dnaK c K.ALEEFAPIAQAGNK.K              | ALEEFAPIAQ                | 642 | 602 | 4.218 | 0.000 |
| splQ2A328IDNAK_FRATH | Chaperone protein dnaK c E.AFAPIAQKAAGNKKE.N             | AFAPIAQKA                 | 642 | 604 | 3.066 | 0.000 |
| splQ2A328IDNAK_FRATH | Chaperone protein dnaK c K.AYAEQAQAAGAAGNK.K             | AYAEQAQAAGA               | 642 | 615 | 4.189 | 0.000 |
| splQ2A328IDNAK_FRATH | Chaperone protein dnaK c K.AYAEQAQAAGQGGAGNKKE.E         | AYAEQAQAAGQGG             | 642 | 617 | 4.206 | 0.001 |
| splQ2A328IDNAK_FRATH | Chaperone protein dnaK c E.QAQAAGAQQGAKAEPPAGNKKE.N      | QAQAAGAQQGAKAEPP          | 642 | 623 | 2.923 | 0.001 |
| splQ2A328IDNAK_FRATH | Chaperone protein dnaK c K.AEEPKEEDVAGNKKE.E             | AEEPKEEDV                 | 642 | 629 | 4.098 | 0.000 |
| splQ2A328IDNAK_FRATH | Chaperone protein dnaK c K.AEEPKEEDVVAGNKKE.E            | AEEPKEEDVV                | 642 | 630 | 3.633 | 0.000 |
| splQ2A332IRL13_FRATH | 50S ribosomal protein L1 K.VYAGEAHPAGNKKE.E              | VYAGEAHP                  | 142 | 131 | 3.607 | 0.000 |
| splQ2A332IRL13_FRATH | 50S ribosomal protein L1 K.VYAGEAHPHAGNKKE.E             | VYAGEAHPH                 | 142 | 132 | 3.833 | 0.000 |
| splQ2A332IRL13_FRATH | 50S ribosomal protein L1 K.VYAGEAHPHAGNK.K               | VYAGEAHPH                 | 142 | 132 | 3.073 | 0.000 |
| splQ2A332IRL13_FRATH | 50S ribosomal protein L1 K.VYAGEAHPHTAAGNKKE.E           | VYAGEAHPHTA               | 142 | 134 | 3.5   | 0.004 |
| splQ2A332IRL13_FRATH | 50S ribosomal protein L1 K.VYAGEAHPHTAQAGNKKE.E          | VYAGEAHPHTAQ              | 142 | 135 | 2.531 | 0.009 |
| splQ2A332IRL13_FRATH | 50S ribosomal protein L1 K.VYAGEAHPHTAQQPAGNKKE.E        | VYAGEAHPHTAQQP            | 142 | 137 | 3.198 | 0.000 |
| splQ2A369IPGK_FRATH  | Phosphoglycerate kinase   K.YIPVAC+57AGILLTNEIQAGNKKE.E  | YIPVACAGILLTNEIQ          | 392 | 172 | 3.831 | 0.000 |
| splQ2A369IPGK_FRATH  | Phosphoglycerate kinase   K.LSVLNLLLAGNK.K               | LSVLNLL                   | 392 | 205 | 3.972 | 0.000 |
| splQ2A3H5IRL9_FRATH  | 50S ribosomal protein L9 E.AAVAVADAIAKAGNKKE.N           | AAVAVADAIAK               | 151 | 73  | 3.8   | 0.000 |
| splQ2A3H5IRL9_FRATH  | 50S ribosomal protein L9 E.AAVAVADAIAKDAGNKKE.N          | AAVAVADAIAKD              | 151 | 74  | 4.144 | 0.000 |
| splQ2A3H5IRL9_FRATH  | 50S ribosomal protein L9 E.AAVAVADAIAKDKVAGNKKE.N        | AAVAVADAIAKDKV            | 151 | 76  | 3.262 | 0.000 |
| splQ2A3H5IRL9_FRATH  | 50S ribosomal protein L9 E.AAVAVADAIAKDKVYAGNKKE.N       | AAVAVADAIAKDKVY           | 151 | 77  | 3.587 | 0.000 |
| splQ2A3H5IRL9_FRATH  | 50S ribosomal protein L9 E.AAVAVADAIAKDKVYTAGNKKE.N      | AAVAVADAIAKDKVYT          | 151 | 78  | 3.316 | 0.000 |
| splQ2A3H5IRL9_FRATH  | 50S ribosomal protein L9 K.VNVVAAEAAGNKKE.E              | VNVVAAEA                  | 151 | 151 | 4.132 | 0.003 |
| splQ2A3H7IRS6_FRATH  | 30S ribosomal protein S6 E.AITEPSVAGNKKE.N               | AITEPSV                   | 111 | 101 | 4.139 | 0.000 |
| splQ2A3H7IRS6_FRATH  | 30S ribosomal protein S6 E.AITEPSVMAGNKKE.N              | AITEPSVM                  | 111 | 102 | 4.407 | 0.000 |
| splQ2A3H7IRS6_FRATH  | 30S ribosomal protein S6 E.AITEPSVM+16AGNKKE.N           | AITEPSVM                  | 111 | 102 | 2.957 | 0.002 |
| splQ2A3H7IRS6_FRATH  | 30S ribosomal protein S6 *.EAITEPSVMAGNKKE.E             | EAITEPSVM                 | 111 | 102 | 2.777 | 0.006 |
| splQ2A3H7IRS6_FRATH  | 30S ribosomal protein S6 E.AITEPSVMMEAGNKKE.E            | AITEPSVMME                | 111 | 104 | 3.809 | 0.000 |
| splQ2A3H7IRS6_FRATH  | 30S ribosomal protein S6 E.AITEPSVM+16MEAGNKKE.E         | AITEPSVMME                | 111 | 104 | 2.612 | 0.002 |
| splQ2A3H7IRS6_FRATH  | 30S ribosomal protein S6 E.AITEPSVM+16EAGNKKE.E          | AITEPSVMME                | 111 | 104 | 2.571 | 0.000 |
| splQ2A3M7IHSLU_FRATH | ATP-dependent hsl prote: K.KMRIKDAIAGNKKE.N              | KMRIKDAI                  | 455 | 234 | 3.448 | 0.000 |
| splQ2A3R0IY929_FRATH | UPF0082 protein FTL_09 K.VMALIDKLEDLDYVQSVYSNANFAGNKKE.E | VMALIDKLEDLDYVQSVYSNANF   | 248 | 239 | 3.513 | 0.000 |
| splQ2A3R0IY929_FRATH | UPF0082 protein FTL_09 K.VMALIDKLEDLDYVQSVYSNANFTQAGNK.K | VMALIDKLEDLDYVQSVYSNANFTQ | 248 | 241 | 3.672 | 0.000 |
| splQ2A3R0IY929_FRATH | UPF0082 protein FTL_09 E.LIEQIGAGNKKE.N                  | LIEQIG                    | 248 | 248 | 3.748 | 0.006 |
| splQ2A3T5IHFQ_FRATH  | Protein hfq hfq K.HAISTIVAGNK.K                          | <b>HAISTIV</b>            | 109 | 63  | 4.112 | 0.001 |

**Table S2.** Junction peptides identified by MudPIT-LC-MS-MS analysis of *F. tularensis* tmRNA- tagged proteins.

|                       |                                  |                                  |                         |     |     |       |       |
|-----------------------|----------------------------------|----------------------------------|-------------------------|-----|-----|-------|-------|
| splQ2A3T5IHfq_FRATH   | Protein hfq hfq                  | K.HAISTIVPAGNK.K                 | <b>HAISTIVP</b>         | 109 | 64  | 4.17  | 0.000 |
| splQ2A3T5IHfq_FRATH   | Protein hfq hfq                  | K.HAISTIVPAGNKKE.N               | <b>HAISTIVP</b>         | 109 | 64  | 3.618 | 0.000 |
| splQ2A3T5IHfq_FRATH   | Protein hfq hfq                  | K.HAISTIVPAAGNK.K                | <b>HAISTIVPA</b>        | 109 | 65  | 4.23  | 0.005 |
| splQ2A3T5IHfq_FRATH   | Protein hfq hfq                  | R.M+16VYSSFNAGNKK.E              | MVYSSFN                 | 109 | 76  | 3.396 | 0.000 |
| splQ2A3T5IHfq_FRATH   | Protein hfq hfq                  | R.MVYSSFNAGNK.K                  | MVYSSFN                 | 109 | 76  | 3.296 | 0.000 |
| splQ2A3T5IHfq_FRATH   | Protein hfq hfq                  | R.MVYSSFNPAAGNKK.E               | MVYSSFNP                | 109 | 77  | 4.247 | 0.000 |
| splQ2A3T5IHfq_FRATH   | Protein hfq hfq                  | R.M+16VYSSFNPAAGNKK.E            | MVYSSFNP                | 109 | 77  | 3.205 | 0.000 |
| splQ2A3T5IHfq_FRATH   | Protein hfq hfq                  | R.MVYSSFNPHYAGNK.K               | MVYSSFNPHY              | 109 | 79  | 4.095 | 0.000 |
| splQ2A3T5IHfq_FRATH   | Protein hfq hfq                  | R.MVYSSFNPHYQNSAGNK.K            | MVYSSFNPHYQNS           | 109 | 82  | 4.369 | 0.000 |
| splQ2A3T5IHfq_FRATH   | Protein hfq hfq                  | R.M+16VYSSFNPHYQNSAGNK.K         | MVYSSFNPHYQNS           | 109 | 82  | 3.576 | 0.000 |
| splQ2A3T5IHfq_FRATH   | Protein hfq hfq                  | R.MVYSSFNPHYQNSNDEQDENVDIAGNKK.E | MVYSSFNPHYQNSNDEQDENVDI | 109 | 93  | 3.429 | 0.000 |
| splQ2A3U2ITIG_FRATH   | Trigger factor tig               | E.NMQAQQAGFAGNKKE.N              | NMQAQQAGF               | 438 | 438 | 3.851 | 0.000 |
| splQ2A419IAROK_FRATH  | Shikimate kinase aroK            | K.NIFLIGPVAGNK.K                 | NIFLIGPV                | 176 | 13  | 3.372 | 0.001 |
| splQ2A419IAROK_FRATH  | Shikimate kinase aroK            | K.ISTFLVEAGNKKE.E                | ISTFLVE                 | 176 | 172 | 3.304 | 0.000 |
| splQ2A4C6IPANB_FRATH  | 3-methyl-2-oxobutanoate          | E.TKANTFPAGNKKE.N                | TKANTFP                 | 265 | 256 | 4.084 | 0.000 |
| splQ2A4C6IPANB_FRATH  | 3-methyl-2-oxobutanoate          | E.TKANTFPAGNKKKE.N               | TKANTFPT                | 265 | 257 | 4.133 | 0.000 |
| splQ2A4C6IPANB_FRATH  | 3-methyl-2-oxobutanoate          | K.ANTFPTKEHC+57AGNKK.E           | ANTFPTKEHC              | 265 | 261 | 2.353 | 0.000 |
| splQ2A4C6IPANB_FRATH  | 3-methyl-2-oxobutanoate          | K.ANTFPTKEHC+57YAGNKK.E          | ANTFPTKEHCY             | 265 | 262 | 3.034 | 0.000 |
| splQ2A4C6IPANB_FRATH  | 3-methyl-2-oxobutanoate          | K.ANTFPTKEHC+57YDAGNKK.E         | ANTFPTKEHCYD            | 265 | 263 | 2.824 | 0.000 |
| splQ2A4C6IPANB_FRATH  | 3-methyl-2-oxobutanoate          | K.ANTFPTKEHC+57YDYAGNKK.E        | ANTFPTKEHCYDY           | 265 | 264 | 2.878 | 0.000 |
| splQ2A4C6IPANB_FRATH  | 3-methyl-2-oxobutanoate          | E.HC+57YDYAGNKKKE.N              | HCYDY                   | 265 | 264 | 3.517 | 0.000 |
| splQ2A4C6IPANB_FRATH  | 3-methyl-2-oxobutanoate          | K.ANTFPTKEHC+57YDYC+57AGNKK.E    | ANTFPTKEHCYDYC          | 265 | 265 | 2.646 | 0.000 |
| splQ2A4C6IPANB_FRATH  | 3-methyl-2-oxobutanoate          | E.HC+57YDYC+57AGNKKKE.N          | HCYDYC                  | 265 | 265 | 3.607 | 0.000 |
| splQ2A4C7IPANC_FRATH  | Pantothenate synthetase          | E.LTNKINSAGNKKKE.N               | LTNKINS                 | 261 | 223 | 3.113 | 0.000 |
| splQ2A4C7IPANC_FRATH  | Pantothenate synthetase          | E.LTNKINSTAGNKKKE.N              | LTNKINST                | 261 | 224 | 3.659 | 0.000 |
| splQ2A4C7IPANC_FRATH  | Pantothenate synthetase          | E.LTNKINSTGAGNKKKE.N             | LTNKINSTG               | 261 | 225 | 3.815 | 0.000 |
| splQ2A4C7IPANC_FRATH  | Pantothenate synthetase          | E.LTNKINSTGAAGNKKKE.N            | LTNKINSTGA              | 261 | 226 | 4.049 | 0.000 |
| splQ2A4R2IRL33_FRATH  | 50S ribosomal protein L3         | K.M+16EIKKYDAGNK.K               | MEIKKYD                 | 51  | 36  | 3.023 | 0.004 |
| splQ2A4R5IMINE_FRATH  | Cell division topological s7     | E.VNIPFNAGNKKKE.N                | VNIPFN                  | 90  | 90  | 4     | 0.000 |
| splQ2A4U1ISYGA_FRATH  | Glycyl-tRNA synthetase a         | R.HAISAGNKKKE.N                  | HAIS                    | 296 | 258 | 3.05  | 0.005 |
| splQ2A4V1IGCSPA_FRATH | Probable glycine dehydrog        | K.VLIAEALAGNKKKE.E               | VLIAEAL                 | 455 | 161 | 3.334 | 0.001 |
| splQ2A4V1IGCSPA_FRATH | Probable glycine dehydrog        | R.VASISHENTQTLATAGNKKKE.E        | VASISHENTQTLAT          | 455 | 369 | 4.254 | 0.000 |
| splQ2A4Y0IPSD_FRATH   | Phosphatidylserine decarboxylase | E.ENKNNIAGNKKKE.E                | ENKNNI                  | 283 | 270 | 2.716 | 0.004 |

**Table S2.** Junction peptides identified by MudPIT-LC-MS-MS analysis of *F. tularensis* tmRNA- tagged proteins.

|                       |                                                             |                    |     |     |       |       |
|-----------------------|-------------------------------------------------------------|--------------------|-----|-----|-------|-------|
| splQ2A4Y0IPSD_FRATH   | Phosphatidylserine decarboxylase K.IQVNQDLALIAGNKK.E        | IQVNQDLALI         | 283 | 281 | 4.149 | 0.002 |
| splQ2A4Y0IPSD_FRATH   | Phosphatidylserine decarboxylase K.IQVNQDLALITAGNKK.E       | IQVNQDLALIT        | 283 | 282 | 4.207 | 0.000 |
| splQ2A5B4IACCA_FRATH  | Acetyl-coenzyme A carboxylase K.DLLPLIFTDFQELHGAGNK.K       | DLLPLIFTDFQELHG    | 315 | 84  | 2.703 | 0.000 |
| splQ2A5B6ISECB2_FRATH | Protein-export protein secretase K.GGFLPLNLAPIAGNK.K        | GGFLPLNLAPI        | 147 | 130 | 4.351 | 0.000 |
| splQ2A5B6ISECB2_FRATH | Protein-export protein secretase K.GGFLPLNLAPINFDAAGNK.K    | GGFLPLNLAPINFDA    | 147 | 133 | 3.242 | 0.000 |
| splQ2A5B6ISECB2_FRATH | Protein-export protein secretase K.GGFLPLNLAPINFDAAGNK.K    | GGFLPLNLAPINFDA    | 147 | 134 | 3.605 | 0.000 |
| splQ2A5B6ISECB2_FRATH | Protein-export protein secretase K.GGFLPLNLAPINFDAIAGNK.K   | GGFLPLNLAPINFDAI   | 147 | 135 | 4.406 | 0.000 |
| splQ2A5B6ISECB2_FRATH | Protein-export protein secretase K.GGFLPLNLAPINFDAIYAGNK.K  | GGFLPLNLAPINFDAIY  | 147 | 136 | 3.674 | 0.005 |
| splQ2A5B6ISECB2_FRATH | Protein-export protein secretase K.GGFLPLNLAPINFDAIYLAGNK.K | GGFLPLNLAPINFDAIYL | 147 | 137 | 2.708 | 0.000 |
| splQ2A5E0IHTPG_FRATH  | Chaperone protein htpG H.E.TVNNTKAIAGNKK.E                  | TVNNTKAI           | 628 | 235 | 3.678 | 0.000 |
| splQ2A5E5IRPOA1_FRATH | DNA-directed RNA polymerase R.VLLSSLSGAAGNKK.E              | VLLSSLSGA          | 323 | 55  | 3.223 | 0.000 |
| splQ2A5F4IRL18_FRATH  | 50S ribosomal protein L1 R.EHGLQFAGNKK.E                    | EHGLQF             | 117 | 117 | 3.165 | 0.009 |
| splQ2A5F4IRL18_FRATH  | 50S ribosomal protein L1 R.EHGLQFAGNKK.K                    | EHGLQF             | 117 | 117 | 2.244 | 0.003 |
| splQ2A5G4IRS3_FRATH   | 30S ribosomal protein S3 K.IQIERPAAGNKK.E                   | IQIERPA            | 223 | 61  | 3.648 | 0.000 |
| splQ2A5G8IRL23_FRATH  | 50S ribosomal protein L2 K.LAEGHDIAGNKK.E                   | LAEGHDI            | 99  | 93  | 3.952 | 0.009 |
| splQ2A5G8IRL23_FRATH  | 50S ribosomal protein L2 K.LAEGHDINAGNKK.E                  | LAEGHDIN           | 99  | 94  | 3.813 | 0.000 |
| splQ2A5G8IRL23_FRATH  | 50S ribosomal protein L2 E.GHDINFAGNKK.E                    | GHDINF             | 99  | 95  | 3.812 | 0.008 |
| splQ2A5G8IRL23_FRATH  | 50S ribosomal protein L2 E.GHDINFAGNKK.E                    | GHDINF             | 99  | 95  | 3.456 | 0.000 |
| splQ2A5G8IRL23_FRATH  | 50S ribosomal protein L2 K.LAEGHDINFAGNKK.K                 | LAEGHDINF          | 99  | 95  | 4.258 | 0.000 |
| splQ2A5G8IRL23_FRATH  | 50S ribosomal protein L2 K.LAEGHDINFAGNKK.E                 | LAEGHDINF          | 99  | 95  | 4.242 | 0.000 |
| splQ2A5G8IRL23_FRATH  | 50S ribosomal protein L2 E.GHDINFVAGNKK.E                   | GHDINFV            | 99  | 96  | 3.948 | 0.003 |
| splQ2A5G8IRL23_FRATH  | 50S ribosomal protein L2 K.LAEGHDINFVAGNKK.K                | LAEGHDINFV         | 99  | 96  | 4.216 | 0.004 |
| splQ2A5G8IRL23_FRATH  | 50S ribosomal protein L2 E.GHDINFVAGNKK.E                   | GHDINFV            | 99  | 97  | 4.063 | 0.001 |
| splQ2A5G8IRL23_FRATH  | 50S ribosomal protein L2 K.LAEGHDINFVAGNKK.E                | LAEGHDINFV         | 99  | 97  | 4.199 | 0.000 |
| splQ2A5H2IEFG_FRATH   | Elongation factor G fusA E.ANVGNPQVAAGNKK.E                 | ANVGNPQVA          | 704 | 487 | 4.278 | 0.000 |
| splQ2A5H6IDUT_FRATH   | Deoxyuridine 5'-triphosphate R.FAQLVIVPVVQAAGNKK.K          | FAQLVIVPVVQA       | 148 | 124 | 2.34  | 0.001 |
| splQ2A5I1IEFTS_FRATH  | Elongation factor Ts tsf K.KALVAAAGDAGNKK.E                 | KALVAAAGD          | 289 | 33  | 3.238 | 0.009 |
| splQ2A5I1IEFTS_FRATH  | Elongation factor Ts tsf K.TVEAETLGAAGNKK.E                 | TVEAETLGA          | 289 | 152 | 4.189 | 0.001 |
| splQ2A5I1IEFTS_FRATH  | Elongation factor Ts tsf E.AETLGAYIHAGNKK.K                 | AETLGAYIH          | 289 | 155 | 3.207 | 0.000 |
| splQ2A5I1IEFTS_FRATH  | Elongation factor Ts tsf K.TVEAETLGAYIHAGNKK.K              | TVEAETLGAYIH       | 289 | 155 | 3.771 | 0.000 |
| splQ2A5I1IEFTS_FRATH  | Elongation factor Ts tsf E.TLGAYIHGAGNKK.K                  | TLGAYIHG           | 289 | 156 | 4.162 | 0.000 |
| splQ2A5I1IEFTS_FRATH  | Elongation factor Ts tsf E.TLGAYIHGSAGNKK.E                 | TLGAYIHGS          | 289 | 157 | 3.734 | 0.000 |
| splQ2A5I1IEFTS_FRATH  | Elongation factor Ts tsf E.TLGAYIHGSAGNKK.K                 | TLGAYIHGS          | 289 | 157 | 2.478 | 0.002 |

**Table S2.** Junction peptides identified by MudPIT-LC-MS-MS analysis of *F. tularensis* tmRNA- tagged proteins.

|                       |                            |                            |                    |     |     |       |       |
|-----------------------|----------------------------|----------------------------|--------------------|-----|-----|-------|-------|
| splQ2A511IEFTS_FRATH  | Elongation factor Ts tsf   | K.TVEAETLGAYIHGSAGNK.K     | TVEAETLGAYIHGS     | 289 | 157 | 2.841 | 0.000 |
| splQ2A511IEFTS_FRATH  | Elongation factor Ts tsf   | K.IGVVAALAGNK.K            | IGVVAAL            | 289 | 165 | 3.804 | 0.000 |
| splQ2A511IEFTS_FRATH  | Elongation factor Ts tsf   | K.IGVVAALEGGAGNK.E         | IGVVAALEGG         | 289 | 168 | 3.163 | 0.000 |
| splQ2A511IEFTS_FRATH  | Elongation factor Ts tsf   | K.DVAMHVAAAGNK.K           | DVAMHVAA           | 289 | 182 | 3.127 | 0.000 |
| splQ2A511IEFTS_FRATH  | Elongation factor Ts tsf   | K.DVAMHVAAAAGNK.K          | DVAMHVAAA          | 289 | 183 | 4.032 | 0.000 |
| splQ2A511IEFTS_FRATH  | Elongation factor Ts tsf   | *.DVAMHVAAANAGNK.K         | DVAMHVAAAN         | 289 | 184 | 4.198 | 0.000 |
| splQ2A511IEFTS_FRATH  | Elongation factor Ts tsf   | D.VAM+16HVAAAANAGNK.K      | VAMHVAAAN          | 289 | 184 | 3.2   | 0.004 |
| splQ2A511IEFTS_FRATH  | Elongation factor Ts tsf   | *.DVAM+16HVAAAANPAGNK.K    | DVAMHVAAAANP       | 289 | 185 | 3.727 | 0.000 |
| splQ2A511IEFTS_FRATH  | Elongation factor Ts tsf   | *.DVAMHVAAAANPAGNK.E       | DVAMHVAAAANP       | 289 | 185 | 3.538 | 0.000 |
| splQ2A511IEFTS_FRATH  | Elongation factor Ts tsf   | *.DVAMHVAAAANPAGNK.K       | DVAMHVAAAANP       | 289 | 185 | 3.475 | 0.000 |
| splQ2A511IEFTS_FRATH  | Elongation factor Ts tsf   | D.VAMHVAAAANPAGNK.K        | VAMHVAAAANP        | 289 | 185 | 3.259 | 0.000 |
| splQ2A511IEFTS_FRATH  | Elongation factor Ts tsf   | E.IFTAQAKEAGNK.E           | IFTAQAKE           | 289 | 211 | 3.128 | 0.002 |
| splQ2A511IEFTS_FRATH  | Elongation factor Ts tsf   | E.SGKPAEIIAGNK.E           | SGKPAEII           | 289 | 219 | 4.185 | 0.002 |
| splQ2A511IEFTS_FRATH  | Elongation factor Ts tsf   | E.SGKPAEIIAGNK.K           | SGKPAEII           | 289 | 219 | 3.295 | 0.000 |
| splQ2A511IEFTS_FRATH  | Elongation factor Ts tsf   | R.LDVGEGIAGNK.E            | LDVGEGI            | 289 | 272 | 4.243 | 0.000 |
| splQ2A512IRS2_FRATH   | 30S ribosomal protein S2   | K.TVPLFQDAVNFVGKTV AAGNK.E | TVPLFQDAVNFVGKTV A | 239 | 60  | 2.276 | 0.005 |
| splQ2A518ISYE_FRATH   | Glutamyl-tRNA synthetase   | D.QEIFSIEEMIAGNK.E         | QEIFSIEEMI         | 468 | 282 | 3.645 | 0.002 |
| splQ2A5L0ILPXD1_FRATH | UDP-3-O-[3-hydroxymyris    | K.ILELFSVPYPAGNK.K         | ILELFSVPYP         | 347 | 100 | 3.698 | 0.000 |
| splQ2A5L0ILPXD1_FRATH | UDP-3-O-[3-hydroxymyris    | E.KAVIDPTAAGNK.E           | KAVIDPTA           | 347 | 115 | 2.794 | 0.003 |
| splQ2A5V4ITRPA_FRATH  | Tryptophan synthase alpha  | E.M+16KAATLNAGNK.E         | MKAATLN            | 269 | 269 | 2.644 | 0.003 |
| splQ2A5X7IRS20_FRATH  | 30S ribosomal protein S2   | K.ENFTKVVAGNK.K            | ENFTKVV            | 90  | 55  | 2.351 | 0.009 |
| splQ9ZAW3IFTSZ_FRATH  | Cell division protein ftsZ | f K.VVGVGGGGNAVQHMAGNK.K   | VVGVGGGGNAVQHM     | 381 | 30  | 2.752 | 0.000 |
| splQ9ZAW3IFTSZ_FRATH  | Cell division protein ftsZ | f K.HVDSIITVPNEKLLAGNK.E   | HVDSIITVPNEKLL     | 381 | 169 | 2.462 | 0.000 |
| splQ9ZAW3IFTSZ_FRATH  | Cell division protein ftsZ | f K.VTVVVTGAGNK.E          | VTVVVTG            | 381 | 314 | 3.939 | 0.002 |
| splQ9ZAW3IFTSZ_FRATH  | Cell division protein ftsZ | f K.VTVVVTGIAGNK.E         | VTVVVTGI           | 381 | 315 | 3.536 | 0.000 |
| splQ9ZAW3IFTSZ_FRATH  | Cell division protein ftsZ | f K.TSSLQQSASSAGNK.E       | TSSLQQSASS         | 381 | 338 | 3.442 | 0.000 |
| splQ9ZAW3IFTSZ_FRATH  | Cell division protein ftsZ | f E.KTSSLQQSASSFAGNK.E     | KTSSLQQSASSF       | 381 | 339 | 4.376 | 0.000 |
| splQ9ZAW3IFTSZ_FRATH  | Cell division protein ftsZ | f E.KTSSLQQSASSFAGNK.K     | KTSSLQQSASSF       | 381 | 339 | 4.107 | 0.000 |
| splQ9ZAW3IFTSZ_FRATH  | Cell division protein ftsZ | f K.TSSLQQSASSFAGNK.K      | TSSLQQSASSF        | 381 | 339 | 4.277 | 0.000 |
| splQ9ZAW3IFTSZ_FRATH  | Cell division protein ftsZ | f K.TSSLQQSASSFAGNK.E      | TSSLQQSASSF        | 381 | 339 | 4.021 | 0.003 |
| splQ9ZAW3IFTSZ_FRATH  | Cell division protein ftsZ | f E.KTSSLQQSASSFSAGNK.E    | KTSSLQQSASSFS      | 381 | 340 | 4.208 | 0.000 |
| splQ9ZAW3IFTSZ_FRATH  | Cell division protein ftsZ | f K.TSSLQQSASSFSAGNK.E     | TSSLQQSASSFS       | 381 | 340 | 4.01  | 0.000 |
| splQ9ZAW3IFTSZ_FRATH  | Cell division protein ftsZ | f E.KTSSLQQSASSFSAGNK.E    | KTSSLQQSASSFSNK    | 381 | 342 | 2.823 | 0.000 |



**Table S2.** Junction peptides identified by MudPIT-LC-MS-MS analysis of *F. tularensis* tmRNA- tagged proteins.

|                        |                                                                    |                              |     |     |       |       |
|------------------------|--------------------------------------------------------------------|------------------------------|-----|-----|-------|-------|
| splQ9ZAW3IFTSZ_FRATH   | Cell division protein ftsZ f E.KTSSLQQSASSFSNKTAGNKKE.N            | KTSSLQQSASSFSNKT             | 381 | 343 | 3.317 | 0.000 |
| splQ9ZAW3IFTSZ_FRATH   | Cell division protein ftsZ f E.KTSSLQQSASSFSNKTSAAGNKKE.N          | KTSSLQQSASSFSNKTS            | 381 | 344 | 2.991 | 0.000 |
| splQ9ZAW3IFTSZ_FRATH   | Cell division protein ftsZ f E.KTSSLQQSASSFSNKTSAAGNKKE.N          | KTSSLQQSASSFSNKTS            | 381 | 345 | 2.728 | 0.000 |
| splQ9ZAW3IFTSZ_FRATH   | Cell division protein ftsZ f E.KTSSLQQSASSFSNKTSAAGNKKE.N          | KTSSLQQSASSFSNKTSAP          | 381 | 346 | 3.001 | 0.000 |
| splQ9ZAW3IFTSZ_FRATH   | Cell division protein ftsZ f K.TSAPFAGNKK.E                        | TSAPF                        | 381 | 347 | 2.982 | 0.006 |
| splQ9ZAW3IFTSZ_FRATH   | Cell division protein ftsZ f E.TEVVTGAAGNKKE.N                     | TEVVTGA                      | 381 | 358 | 2.904 | 0.005 |
| splQ9ZAW3IFTSZ_FRATH   | Cell division protein ftsZ f E.TEVVTGASNAGNKKE.N                   | TEVVTGASN                    | 381 | 360 | 3.277 | 0.001 |
| splQ9ZAW3IFTSZ_FRATH   | Cell division protein ftsZ f E.TEVVTGASNAAGNKKE.N                  | TEVVTGASNA                   | 381 | 361 | 4.301 | 0.001 |
| splQ9ZAW3IFTSZ_FRATH   | Cell division protein ftsZ f E.TEVVTGASNAPAGNKKE.N                 | TEVVTGASNAP                  | 381 | 362 | 4.31  | 0.000 |
| splQ9ZAW3IFTSZ_FRATH   | Cell division protein ftsZ f E.TEVVTGASNAPKAGNKKE.N                | TEVVTGASNAPK                 | 381 | 363 | 4.36  | 0.000 |
| splQ9ZAW3IFTSZ_FRATH   | Cell division protein ftsZ f E.TEVVTGASNAPKTAGNKKE.N               | TEVVTGASNAPKT                | 381 | 364 | 4.232 | 0.000 |
| splQ9ZAW3IFTSZ_FRATH   | Cell division protein ftsZ f E.TEVVTGASNAPKTAGNKENR.V              | TEVVTGASNAPKT                | 381 | 364 | 3.467 | 0.000 |
| splQ9ZAW3IFTSZ_FRATH   | Cell division protein ftsZ f E.TEVVTGASNAPKTDSAGNKKE.N             | TEVVTGASNAPKTDS              | 381 | 366 | 4.234 | 0.000 |
| splQ9ZAW3IFTSZ_FRATH   | Cell division protein ftsZ f E.VVTGASNAPKTDSAGNKKE.N               | VVTGASNAPKTDS                | 381 | 366 | 2.752 | 0.000 |
| splQ9ZAW3IFTSZ_FRATH   | Cell division protein ftsZ f E.VVTGASNAPKTDSDDVNKAGNKKE.N          | VVTGASNAPKTDSDDVNK           | 381 | 371 | 2.168 | 0.001 |
| splQ9ZAW3IFTSZ_FRATH   | Cell division protein ftsZ f E.TEVVTGASNAPKTDSDDVNKSDIPSFLRAGNKKE. | TEVVTGASNAPKTDSDDVNKSDIPSFLR | 381 | 379 | 3.109 | 0.000 |
| triQ2A144IQ2A144_FRATH | Peptide methionine sulfox K.HNQSVYTYQLPSTHFAGNKK.E                 | HNQSVYTYQLPSTHF              | 229 | 169 | 3.6   | 0.000 |
| triQ2A144IQ2A144_FRATH | Peptide methionine sulfox K.AESYHQDYHHKAGNK.K                      | AESYHQDYHHK                  | 229 | 182 | 3.895 | 0.000 |
| triQ2A193IQ2A193_FRATH | Glutamine synthetase FTL E.VYNPDGQTPHAAGNKKE.E                     | VYNPDGQTPHA                  | 345 | 91  | 2.063 | 0.005 |
| triQ2A193IQ2A193_FRATH | Glutamine synthetase FTL K.DILNYGHNLAGNKKE.E                       | DILNYGHNL                    | 345 | 280 | 4.018 | 0.001 |
| triQ2A193IQ2A193_FRATH | Glutamine synthetase FTL K.DILNYGHNLAGNK.K                         | DILNYGHNL                    | 345 | 280 | 2.061 | 0.009 |
| triQ2A1C0IQ2A1C0_FRATH | Outer membrane protein E.TVPTALGAGNKKE.N                           | TVPTALG                      | 509 | 117 | 3.218 | 0.000 |
| triQ2A1C4IQ2A1C4_FRATH | Amidophosphoribosyltran E.KAYMVAAGNKKE.N                           | KAYMVA                       | 496 | 206 | 2.736 | 0.003 |
| triQ2A1C8IQ2A1C8_FRATH | Putative uncharacterized E.VGSTYNYQRVNADDQDKFTIEAGNKKE.E           | VGSTYNYQRVNADDQDKFTIE        | 132 | 53  | 2.954 | 0.000 |
| triQ2A1C8IQ2A1C8_FRATH | Putative uncharacterized K.TSANSSYQYSYVAGNKKE.E                    | TSANSSYQYSYV                 | 132 | 90  | 2.877 | 0.000 |
| triQ2A1C8IQ2A1C8_FRATH | Putative uncharacterized K.IRNDNVINAAGNKKE.E                       | IRNDNVINA                    | 132 | 128 | 3.69  | 0.000 |
| triQ2A1E1IQ2A1E1_FRATH | Lipase/acyltransferase FT K.PKVLGAGNK.K                            | PKVL                         | 183 | 113 | 3.865 | 0.008 |
| triQ2A1E1IQ2A1E1_FRATH | Lipase/acyltransferase FT K.PKVLGAGNKKE.E                          | PKVL                         | 183 | 113 | 3.283 | 0.009 |
| triQ2A1F6IQ2A1F6_FRATH | NADH-quinone oxidoreduc K.LLAAVGSVNIAGNKKE.E                       | LLAAVGSVNI                   | 788 | 348 | 3.067 | 0.000 |
| triQ2A1F6IQ2A1F6_FRATH | NADH-quinone oxidoreduc R.LAADNIQYIALAGNKKE.E                      | LAADNIQYIAL                  | 788 | 438 | 4.072 | 0.000 |
| triQ2A1I4IQ2A1I4_FRATH | Putative uncharacterized K.SLANNIVSFAGNKKE.E                       | SLANNIVSF                    | 947 | 152 | 3.184 | 0.000 |
| triQ2A1I4IQ2A1I4_FRATH | Putative uncharacterized K.SLANNIVSFLAGNK.K                        | SLANNIVSFL                   | 947 | 153 | 4.078 | 0.000 |
| triQ2A1I8IQ2A1I8_FRATH | Citrate synthase FTL_17 E.IINKMPVAGNKKE.E                          | IINKMPV                      | 419 | 114 | 2.948 | 0.004 |

**Table S2.** Junction peptides identified by MudPIT-LC-MS-MS analysis of *F. tularensis* tmRNA- tagged proteins.

|                         |                                                        |                     |     |     |       |       |
|-------------------------|--------------------------------------------------------|---------------------|-----|-----|-------|-------|
| triQ2A1I8I2A1I8_FRATH   | Citrate synthase FTL_17† K.LGHSDNPLAGNKK.E             | LGHSDNPL            | 419 | 333 | 3.941 | 0.000 |
| triQ2A1I8I2A1I8_FRATH   | Citrate synthase FTL_17† K.LGHSDNPLLVAGNK.K            | LGHSDNPLLV          | 419 | 336 | 3.328 | 0.000 |
| triQ2A1I8I2A1I8_FRATH   | Citrate synthase FTL_17† K.LFSNVDFYSGIAGNK.K           | LFSNVDFYSGII        | 419 | 366 | 3.849 | 0.008 |
| triQ2A1J2I2Q2A1J2_FRATH | Succinate dehydrogenase K.FIGPSGLLQAAGNK.K             | FIGPSGLLQA          | 233 | 173 | 3.304 | 0.001 |
| triQ2A1J4I2Q2A1J4_FRATH | Dihydrolipoamide succinyl E.DVKKAVASVAGNKK.E           | DVKKAVASV           | 489 | 243 | 3.562 | 0.000 |
| triQ2A1J4I2Q2A1J4_FRATH | Dihydrolipoamide succinyl K.AVASVNKPAGNKK.E            | AVASVNKP            | 489 | 246 | 2.733 | 0.002 |
| triQ2A1J4I2Q2A1J4_FRATH | Dihydrolipoamide succinyl K.AVASVNKPQAGNK.K            | AVASVNKPQ           | 489 | 247 | 3.777 | 0.009 |
| triQ2A1J4I2Q2A1J4_FRATH | Dihydrolipoamide succinyl K.AVASVNKPQQAGNK.K           | AVASVNKPQQ          | 489 | 248 | 4.096 | 0.008 |
| triQ2A1J4I2Q2A1J4_FRATH | Dihydrolipoamide succinyl K.AVASVNKPQQQAGNK.K          | AVASVNKPQQQ         | 489 | 249 | 3.459 | 0.009 |
| triQ2A1J4I2Q2A1J4_FRATH | Dihydrolipoamide succinyl K.AVASVNKPQQQAGNKK.E         | AVASVNKPQQQ         | 489 | 249 | 2.764 | 0.000 |
| triQ2A1J4I2Q2A1J4_FRATH | Dihydrolipoamide succinyl K.AVASVNKPQQQTAGNK.K         | AVASVNKPQQQT        | 489 | 250 | 4.098 | 0.000 |
| triQ2A1J4I2Q2A1J4_FRATH | Dihydrolipoamide succinyl K.AVASVNKPQQQTAGNKK.E        | AVASVNKPQQQT        | 489 | 250 | 3.057 | 0.000 |
| triQ2A1J4I2Q2A1J4_FRATH | Dihydrolipoamide succinyl K.AVASVNKPQQQTVAGNK.K        | AVASVNKPQQQTV       | 489 | 251 | 4.332 | 0.000 |
| triQ2A1J4I2Q2A1J4_FRATH | Dihydrolipoamide succinyl K.AVASVNKPQQQTVAGNKK.E       | AVASVNKPQQQTV       | 489 | 251 | 3.481 | 0.000 |
| triQ2A1J4I2Q2A1J4_FRATH | Dihydrolipoamide succinyl K.AVASVNKPQQQTVVAGNK.K       | AVASVNKPQQQTVV      | 489 | 252 | 4.401 | 0.000 |
| triQ2A1J4I2Q2A1J4_FRATH | Dihydrolipoamide succinyl K.AVASVNKPQQQTVVAGNKK.E      | AVASVNKPQQQTVV      | 489 | 252 | 3.026 | 0.000 |
| triQ2A1J4I2Q2A1J4_FRATH | Dihydrolipoamide succinyl K.AVASVNKPQQQTVVINQGAAGNK.K  | AVASVNKPQQQTVVINQGA | 489 | 257 | 3.189 | 0.000 |
| triQ2A1J4I2Q2A1J4_FRATH | Dihydrolipoamide succinyl K.AVASVNKPQQQTVVINQGAAGNKK.E | AVASVNKPQQQTVVINQGA | 489 | 257 | 3.146 | 0.000 |
| triQ2A1J4I2Q2A1J4_FRATH | Dihydrolipoamide succinyl E.LIEDPNRILLQAGNKK.E         | LIEDPNRILLQ         | 489 | 488 | 3.071 | 0.000 |
| triQ2A1S0I2Q2A1S0_FRATH | GlpX protein FTL_1701 R.HITAEHSFAGNKK.E                | HITAEHSF            | 328 | 317 | 3.719 | 0.000 |
| triQ2A1S0I2Q2A1S0_FRATH | GlpX protein FTL_1701 R.HITAEHSFAGNK.K                 | HITAEHSF            | 328 | 317 | 3.575 | 0.000 |
| triQ2A1U2I2Q2A1U2_FRATH | Putative uncharacterized K.ALKDTGYNTTAGNKK.E           | ALKDTGYNTT          | 337 | 63  | 4.164 | 0.000 |
| triQ2A1U2I2Q2A1U2_FRATH | Putative uncharacterized E.KALKDTGYNTTAGNKK.E          | KALKDTGYNTT         | 337 | 63  | 4.025 | 0.002 |
| triQ2A1U2I2Q2A1U2_FRATH | Putative uncharacterized K.ILLDALLDKNIDIAGNKK.E        | ILLDALLDKNIDII      | 337 | 99  | 4.115 | 0.000 |
| triQ2A1U2I2Q2A1U2_FRATH | Putative uncharacterized K.ILLDALLDKNIDIWAGNKK.E       | ILLDALLDKNIDIW      | 337 | 100 | 3.226 | 0.001 |
| triQ2A1U2I2Q2A1U2_FRATH | Putative uncharacterized K.ILLDALLDKNIDIWFAGNKK.E      | ILLDALLDKNIDIWF     | 337 | 101 | 3.612 | 0.000 |
| triQ2A1U2I2Q2A1U2_FRATH | Putative uncharacterized K.ILLDALLDKNIDIWFLKAGNK.K     | ILLDALLDKNIDIWFLK   | 337 | 103 | 3.079 | 0.000 |
| triQ2A1U2I2Q2A1U2_FRATH | Putative uncharacterized K.GGGGAFNAGNKK.E              | GGGGAFN             | 337 | 110 | 3.058 | 0.008 |
| triQ2A1U2I2Q2A1U2_FRATH | Putative uncharacterized K.GGGGAFNLLPYLDAGNKK.E        | GGGGAFNLLPYLD       | 337 | 117 | 4.249 | 0.000 |
| triQ2A1U2I2Q2A1U2_FRATH | Putative uncharacterized K.GGGGAFNLLPYLDHAGNKK.E       | GGGGAFNLLPYLDH      | 337 | 118 | 2.875 | 0.003 |
| triQ2A1U2I2Q2A1U2_FRATH | Putative uncharacterized K.GGGGAFNLLPYLDHINEAGNK.K     | GGGGAFNLLPYLDHINE   | 337 | 121 | 2.976 | 0.008 |
| triQ2A1U2I2Q2A1U2_FRATH | Putative uncharacterized K.ILVGFSDVTAAGNKK.E           | ILVGFSDVTA          | 337 | 138 | 4.34  | 0.000 |
| triQ2A1U2I2Q2A1U2_FRATH | Putative uncharacterized K.ILVGFSDVTAIAGNKK.E          | ILVGFSDVTAI         | 337 | 139 | 4.368 | 0.000 |

**Table S2.** Junction peptides identified by MudPIT-LC-MS-MS analysis of *F. tularensis* tmRNA- tagged proteins.

|                                                   |                                      |                             |     |     |       |       |
|---------------------------------------------------|--------------------------------------|-----------------------------|-----|-----|-------|-------|
| triQ2A1U2IQ2A1U2_FRATH Putative uncharacterized   | K.ILVGFSVDVTAIAGNK.K                 | ILVGFSDVTAI                 | 337 | 139 | 4.284 | 0.000 |
| triQ2A1U2IQ2A1U2_FRATH Putative uncharacterized   | K.SLHGVVAAAGNK.K                     | SLHGVVAA                    | 337 | 158 | 3.915 | 0.000 |
| triQ2A1U2IQ2A1U2_FRATH Putative uncharacterized   | R.IPNITEIAGNKK.E                     | IPNITEI                     | 337 | 186 | 4.078 | 0.009 |
| triQ2A1U2IQ2A1U2_FRATH Putative uncharacterized   | E.IINNGISAGNKK.E.N                   | IINNGIS                     | 337 | 192 | 3.542 | 0.002 |
| triQ2A1U2IQ2A1U2_FRATH Putative uncharacterized   | E.IINNGISYDKAGNKK.E.N                | IINNGISYDK                  | 337 | 195 | 3.859 | 0.000 |
| triQ2A1U2IQ2A1U2_FRATH Putative uncharacterized   | E.IINNGISYDKLAGNKK.E.N               | IINNGISYDKL                 | 337 | 196 | 4.144 | 0.000 |
| triQ2A1U2IQ2A1U2_FRATH Putative uncharacterized   | K.TFNRPVYAGNK.K                      | TFNRPVY                     | 337 | 301 | 3.947 | 0.000 |
| triQ2A1U2IQ2A1U2_FRATH Putative uncharacterized   | K.TFNRPVYAGNKK.E                     | TFNRPVY                     | 337 | 301 | 3.382 | 0.006 |
| triQ2A1V9IQ2A1V9_FRATH Hypothetical membrane p    | R.NQIIQSSYQKPSDDTTSQQPSTPAAAGNK.K    | NQIIQSSYQKPSDDTTSQQPSTPAA   | 438 | 120 | 3.595 | 0.000 |
| triQ2A1V9IQ2A1V9_FRATH Hypothetical membrane p    | K.IPVLIPTAGNK.K                      | IPVLIPT                     | 438 | 152 | 4.291 | 0.001 |
| triQ2A1V9IQ2A1V9_FRATH Hypothetical membrane p    | K.IPVLIPTDAGNKK.E                    | IPVLIPTD                    | 438 | 153 | 4.164 | 0.000 |
| triQ2A1V9IQ2A1V9_FRATH Hypothetical membrane p    | E.TYKSNLDTAGNKK.E.N                  | TYKSNLDT                    | 438 | 167 | 4.065 | 0.001 |
| triQ2A1V9IQ2A1V9_FRATH Hypothetical membrane p    | E.TYKSNLDTQIAGNKK.E.N                | TYKSNLDTQI                  | 438 | 169 | 4.278 | 0.000 |
| triQ2A1V9IQ2A1V9_FRATH Hypothetical membrane p    | E.TYKSNLDTQINAGNKK.E.N               | TYKSNLDTQIN                 | 438 | 170 | 4.234 | 0.003 |
| triQ2A1V9IQ2A1V9_FRATH Hypothetical membrane p    | E.TYKSNLDTQINSAGNKK.E.N              | TYKSNLDTQINS                | 438 | 171 | 4.081 | 0.000 |
| triQ2A1V9IQ2A1V9_FRATH Hypothetical membrane p    | E.TYKSNLDTQINSNIEAGNKK.E             | TYKSNLDTQINSNIE             | 438 | 176 | 2.84  | 0.001 |
| triQ2A207IQ2A207_FRATH Stringent starvation prote | K.KRLFARDSVKKAGNKK.E.N               | KRLFARDSVKK                 | 209 | 190 | 2.354 | 0.005 |
| triQ2A221IQ2A221_FRATH Acetyl-CoA carboxylase, I  | K.NNTAAITSVVSAAPVASNVAGNKK.E         | NNTAAITSVVSAAPVASNV         | 157 | 54  | 2.733 | 0.001 |
| triQ2A221IQ2A221_FRATH Acetyl-CoA carboxylase, I  | K.NNTAAITSVVSAAPVASNVASAAPAGNKK.E    | NNTAAITSVVSAAPVASNVASAAP    | 157 | 59  | 2.264 | 0.000 |
| triQ2A221IQ2A221_FRATH Acetyl-CoA carboxylase, I  | K.NNTAAITSVVSAAPVASNVASAAPAVATAGNKK  | NNTAAITSVVSAAPVASNVASAAPAVA | 157 | 63  | 2.328 | 0.001 |
| triQ2A221IQ2A221_FRATH Acetyl-CoA carboxylase, I  | K.NNTAAITSVVSAAPVASNVASAAPAVATAAGNKK | NNTAAITSVVSAAPVASNVASAAPAVA | 157 | 64  | 3.155 | 0.000 |
| triQ2A221IQ2A221_FRATH Acetyl-CoA carboxylase, I  | K.NNTAAITSVVSAAPVASNVASAAPAVATAAATSA | NNTAAITSVVSAAPVASNVASAAPAVA | 157 | 67  | 2.728 | 0.001 |
| triQ2A221IQ2A221_FRATH Acetyl-CoA carboxylase, I  | K.NNTAAITSVVSAAPVASNVASAAPAVATAAATSA | NNTAAITSVVSAAPVASNVASAAPAVA | 157 | 68  | 2.645 | 0.000 |
| triQ2A221IQ2A221_FRATH Acetyl-CoA carboxylase, I  | K.NNTAAITSVVSAAPVASNVASAAPAVATAAATSA | NNTAAITSVVSAAPVASNVASAAPAVA | 157 | 70  | 2.471 | 0.000 |
| triQ2A221IQ2A221_FRATH Acetyl-CoA carboxylase, I  | E.ISGEEIKSPAGNKK.E.N                 | ISGEEIKSP                   | 157 | 87  | 3.902 | 0.000 |
| triQ2A221IQ2A221_FRATH Acetyl-CoA carboxylase, I  | K.SPMVGTFAGNKK.E                     | SPMVGTF                     | 157 | 92  | 4.106 | 0.000 |
| triQ2A221IQ2A221_FRATH Acetyl-CoA carboxylase, I  | K.SPMVGTFAGNK.K                      | SPMVGTF                     | 157 | 92  | 3.142 | 0.000 |
| triQ2A221IQ2A221_FRATH Acetyl-CoA carboxylase, I  | K.SPM+16VGTGTFAGNK.K                 | SPMVGTF                     | 157 | 92  | 3.066 | 0.000 |
| triQ2A221IQ2A221_FRATH Acetyl-CoA carboxylase, I  | K.SPMVGTFYGASSAGNKK.E                | SPMVGTFYGASS                | 157 | 97  | 4.189 | 0.000 |
| triQ2A221IQ2A221_FRATH Acetyl-CoA carboxylase, I  | K.SPMVGTFYGASSAGNKKENR.V             | SPMVGTFYGASS                | 157 | 97  | 3.551 | 0.000 |
| triQ2A221IQ2A221_FRATH Acetyl-CoA carboxylase, I  | K.VNLAAEISGEEIKSPMVGTFYGASSAGNKK.E   | VNLAAEISGEEIKSPMVGTFYGASS   | 157 | 97  | 3.103 | 0.000 |
| triQ2A221IQ2A221_FRATH Acetyl-CoA carboxylase, I  | K.SPMVGTFYGASSPAGNKK.E               | SPMVGTFYGASSP               | 157 | 98  | 2.828 | 0.000 |
| triQ2A221IQ2A221_FRATH Acetyl-CoA carboxylase, I  | K.VNLAAEISGEEIKSPMVGTFYGASSPAGNKK.E  | VNLAAEISGEEIKSPMVGTFYGASSP  | 157 | 98  | 3.382 | 0.000 |

**Table S2.** Junction peptides identified by MudPIT-LC-MS-MS analysis of *F. tularensis* tmRNA- tagged proteins.

|                                                                                     |                          |     |     |       |       |
|-------------------------------------------------------------------------------------|--------------------------|-----|-----|-------|-------|
| triQ2A221IQ2A221_FRATH Acetyl-CoA carboxylase, I K.SPMVGTFTYGASSPDAAPAGNKK.E        | SPMVGTFTYGASSPDAAP       | 157 | 102 | 4.195 | 0.000 |
| triQ2A221IQ2A221_FRATH Acetyl-CoA carboxylase, I K.DGVPVQFDQPLFIAGNK.K              | DGVPVQFDQPLFI            | 157 | 156 | 4.493 | 0.002 |
| triQ2A221IQ2A221_FRATH Acetyl-CoA carboxylase, I K.DGVPVQFDQPLFIAGNKK.E             | DGVPVQFDQPLFI            | 157 | 156 | 4.377 | 0.005 |
| triQ2A234IQ2A234_FRATH Putative uncharacterized R.GMPNGIAGNKK.E                     | GMPNGII                  | 239 | 59  | 2.28  | 0.003 |
| triQ2A234IQ2A234_FRATH Putative uncharacterized R.GMPNGIIHAGNKK.E                   | GMPNGIIH                 | 239 | 60  | 3.217 | 0.000 |
| triQ2A234IQ2A234_FRATH Putative uncharacterized R.GMPNGIIHTAGNKK.E                  | GMPNGIIHT                | 239 | 61  | 2.988 | 0.000 |
| triQ2A234IQ2A234_FRATH Putative uncharacterized E.IVVPLMYVDSAGNKK.E.N               | IVVPLMYVDS               | 239 | 88  | 4.551 | 0.000 |
| triQ2A234IQ2A234_FRATH Putative uncharacterized E.IVVPLMYVDSSGAGNKK.E.N             | IVVPLMYVDSSG             | 239 | 90  | 4.109 | 0.002 |
| triQ2A234IQ2A234_FRATH Putative uncharacterized E.IVVPLMYVDSSGKAGNKK.E.N            | IVVPLMYVDSSGK            | 239 | 91  | 3.072 | 0.001 |
| triQ2A234IQ2A234_FRATH Putative uncharacterized E.IVVPLMYVDSSGKPTAGNKK.E            | IVVPLMYVDSSGKPT          | 239 | 93  | 2.45  | 0.000 |
| triQ2A234IQ2A234_FRATH Putative uncharacterized E.SFVFAGNAGNKK.E.N                  | SFVFAGN                  | 239 | 127 | 4.06  | 0.001 |
| triQ2A234IQ2A234_FRATH Putative uncharacterized E.AGTAVANAGNKK.E                    | AGTAVAN                  | 239 | 138 | 3.302 | 0.008 |
| triQ2A234IQ2A234_FRATH Putative uncharacterized E.AGTAVANAGNKK.E.N                  | AGTAVAN                  | 239 | 138 | 3.067 | 0.001 |
| triQ2A234IQ2A234_FRATH Putative uncharacterized E.AGTAVANQAGNKK.E                   | AGTAVANQ                 | 239 | 139 | 3.679 | 0.002 |
| triQ2A234IQ2A234_FRATH Putative uncharacterized E.AGTAVANQAGNKK.E.N                 | AGTAVANQ                 | 239 | 139 | 2.544 | 0.006 |
| triQ2A234IQ2A234_FRATH Putative uncharacterized E.AGTAVANQKAGNKK.E.N                | AGTAVANQK                | 239 | 140 | 3.306 | 0.000 |
| triQ2A234IQ2A234_FRATH Putative uncharacterized E.AGTAVANQKSDIAGNKK.E.N             | AGTAVANQKSDI             | 239 | 143 | 4.033 | 0.000 |
| triQ2A234IQ2A234_FRATH Putative uncharacterized E.AGTAVANQKSDIYAGNKK.E.N            | AGTAVANQKSDIY            | 239 | 144 | 2.973 | 0.000 |
| triQ2A234IQ2A234_FRATH Putative uncharacterized E.AGTAVANQKSDIYKAGNKK.E.N           | AGTAVANQKSDIYK           | 239 | 146 | 2.86  | 0.000 |
| triQ2A234IQ2A234_FRATH Putative uncharacterized E.AGTAVANQKSDIYKNGAGNKK.E.N         | AGTAVANQKSDIYKNG         | 239 | 147 | 2.532 | 0.000 |
| triQ2A234IQ2A234_FRATH Putative uncharacterized E.AGTAVANQKSDIYKNGGAGNKK.E.N        | AGTAVANQKSDIYKNGG        | 239 | 148 | 2.766 | 0.005 |
| triQ2A234IQ2A234_FRATH Putative uncharacterized E.AGTAVANQKSDIYKNGGVAGNKK.E.N       | AGTAVANQKSDIYKNGGV       | 239 | 149 | 3.297 | 0.000 |
| triQ2A234IQ2A234_FRATH Putative uncharacterized E.AGTAVANQKSDIYKNGGVIAGNKK.E.N      | AGTAVANQKSDIYKNGGVI      | 239 | 150 | 3.05  | 0.000 |
| triQ2A234IQ2A234_FRATH Putative uncharacterized E.AGTAVANQKSDIYKNGGVINPNDGAGNKK.E.N | AGTAVANQKSDIYKNGGVINPNDG | 239 | 155 | 3.489 | 0.000 |
| triQ2A234IQ2A234_FRATH Putative uncharacterized E.AQVQDGGTTMFAKAAAGNKK.E.N          | AQVQDGGTTMFAKAA          | 239 | 176 | 2.266 | 0.001 |
| triQ2A234IQ2A234_FRATH Putative uncharacterized K.VTATC+57TNPAGNKK.E                | VTATCTNYP                | 239 | 229 | 3.675 | 0.000 |
| triQ2A234IQ2A234_FRATH Putative uncharacterized K.VTATC+57TNPVPAQAGNK.K             | VTATCTNYPVAQ             | 239 | 232 | 3.909 | 0.000 |
| triQ2A234IQ2A234_FRATH Putative uncharacterized K.VTATC+57TNPVPAQFAGNK.K            | VTATCTNYPVAQF            | 239 | 233 | 3.576 | 0.000 |
| triQ2A237IQ2A237_FRATH DNA mismatch repair prot K.LALAPAGNKK.E                      | LALAP                    | 600 | 82  | 4.209 | 0.005 |
| triQ2A237IQ2A237_FRATH DNA mismatch repair prot K.LALAPAGNKK.E.N                    | LALAP                    | 600 | 82  | 3.105 | 0.001 |
| triQ2A254IQ2A254_FRATH Hypothetical membrane p K.FYKKAGNKK.E.N                      | FYKK                     | 637 | 139 | 2.451 | 0.004 |
| triQ2A259IQ2A259_FRATH DNA gyrase subunit B FTI R.SAAEVILTVLHAGNK.K                 | SAAEVILTVLH              | 803 | 101 | 4.336 | 0.000 |
| triQ2A274IQ2A274_FRATH Putative uncharacterized E.LLSSSLAAGNKK.E.N                  | LLSSSLA                  | 190 | 140 | 2.973 | 0.001 |

**Table S2.** Junction peptides identified by MudPIT-LC-MS-MS analysis of *F. tularensis* tmRNA- tagged proteins.

|                                                                               |                      |     |     |       |       |
|-------------------------------------------------------------------------------|----------------------|-----|-----|-------|-------|
| triQ2A274IQ2A274_FRATH Putative uncharacterized K.IPGLATNGNIDMIFAGNK.K        | IPGLATNGNIDMIF       | 190 | 164 | 2.371 | 0.000 |
| triQ2A274IQ2A274_FRATH Putative uncharacterized K.AGVYQFAPGHVAAGNK.K          | AGVYQFAPGHVA         | 190 | 180 | 4.152 | 0.000 |
| triQ2A274IQ2A274_FRATH Putative uncharacterized K.AGVYQFAPGHVAAAGNK.K         | AGVYQFAPGHVAA        | 190 | 181 | 4.417 | 0.000 |
| triQ2A274IQ2A274_FRATH Putative uncharacterized K.AGVYQFAPGHVAAAYAGNK.K       | AGVYQFAPGHVAAAY      | 190 | 182 | 4.062 | 0.000 |
| triQ2A284IQ2A284_FRATH Chitinase family 18 protei K.DLEIERPAGNKK.E            | DLEIERP              | 764 | 149 | 3.562 | 0.000 |
| triQ2A284IQ2A284_FRATH Chitinase family 18 protei K.VDGDLEIERPAGNKK.E         | VDGDLEIERP           | 764 | 149 | 2.989 | 0.000 |
| triQ2A284IQ2A284_FRATH Chitinase family 18 protei R.KYNPYDFAGNKK.E            | KYNPYDF              | 764 | 183 | 4.096 | 0.003 |
| triQ2A284IQ2A284_FRATH Chitinase family 18 protei *.KYNPYDFKYDKLNTIAGNKK.E    | KYNPYDFKYDKLNTII     | 764 | 192 | 3.343 | 0.000 |
| triQ2A284IQ2A284_FRATH Chitinase family 18 protei K.YNPYDFKYDKLNTIAGNKK.E     | YNPYDFKYDKLNTII      | 764 | 192 | 3.259 | 0.000 |
| triQ2A284IQ2A284_FRATH Chitinase family 18 protei K.LNTIYAFAGNK.K             | LNTIYAF              | 764 | 195 | 3.157 | 0.000 |
| triQ2A284IQ2A284_FRATH Chitinase family 18 protei K.VAMQPWAAGNKK.E            | VAMQPWA              | 764 | 513 | 2.873 | 0.000 |
| triQ2A284IQ2A284_FRATH Chitinase family 18 protei K.VAMQPWAYSPSAGNK.K         | VAMQPWAYSPS          | 764 | 517 | 2.725 | 0.002 |
| triQ2A284IQ2A284_FRATH Chitinase family 18 protei E.NSASISWAGNKK.E            | NSASISW              | 764 | 590 | 3.17  | 0.000 |
| triQ2A284IQ2A284_FRATH Chitinase family 18 protei E.NSASISWNKAGNKK.E          | NSASISWNK            | 764 | 592 | 3.938 | 0.000 |
| triQ2A292IQ2A292_FRATH Glycerophosphoryl diestei K.TPIKDLTAGNKK.E             | TPIKDLT              | 344 | 99  | 3.45  | 0.000 |
| triQ2A292IQ2A292_FRATH Glycerophosphoryl diestei K.KYTVGYIKPAGNKK.E           | KYTVGYIKP            | 344 | 113 | 4.062 | 0.000 |
| triQ2A292IQ2A292_FRATH Glycerophosphoryl diestei K.YTVGYIKPAGNKK.E            | YTVGYIKP             | 344 | 113 | 3.353 | 0.000 |
| triQ2A292IQ2A292_FRATH Glycerophosphoryl diestei K.KYTVGYIKPDSAGNKK.E         | KYTVGYIKPDS          | 344 | 115 | 3.996 | 0.000 |
| triQ2A292IQ2A292_FRATH Glycerophosphoryl diestei K.YTVGYIKPDSAGNKK.E          | YTVGYIKPDS           | 344 | 115 | 3.314 | 0.000 |
| triQ2A292IQ2A292_FRATH Glycerophosphoryl diestei K.MYPNHIGAGNKK.E             | MYPNHIG              | 344 | 126 | 3.685 | 0.000 |
| triQ2A292IQ2A292_FRATH Glycerophosphoryl diestei K.M+16YPNHIGAGNKK.E          | MYPNHIG              | 344 | 126 | 2.305 | 0.002 |
| triQ2A292IQ2A292_FRATH Glycerophosphoryl diestei K.MYPNHIGMDNVAGNKK.E         | MYPNHIGMDNV          | 344 | 130 | 3.574 | 0.000 |
| triQ2A292IQ2A292_FRATH Glycerophosphoryl diestei E.VINYVKSAGNKK.E             | VINYVKS              | 344 | 145 | 3.926 | 0.000 |
| triQ2A292IQ2A292_FRATH Glycerophosphoryl diestei E.VINYVKSAGNKK.E             | VINYVKS              | 344 | 146 | 4.243 | 0.001 |
| triQ2A292IQ2A292_FRATH Glycerophosphoryl diestei E.VINYVKSAGNKK.E             | VINYVKS              | 344 | 147 | 4.178 | 0.000 |
| triQ2A292IQ2A292_FRATH Glycerophosphoryl diestei E.VINYVKSAGNKK.E             | VINYVKS              | 344 | 148 | 4.241 | 0.000 |
| triQ2A292IQ2A292_FRATH Glycerophosphoryl diestei E.IKTNAGNKKENR.V             | IKTN                 | 344 | 159 | 3.379 | 0.009 |
| triQ2A292IQ2A292_FRATH Glycerophosphoryl diestei E.IKTNPYDLEAGNKK.E           | IKTNPYDLE            | 344 | 164 | 3.566 | 0.000 |
| triQ2A292IQ2A292_FRATH Glycerophosphoryl diestei K.WTAPLDPKDYNINYNPLMVKAGNK.K | WTAPLDPKDYNINYNPLMVK | 344 | 254 | 3.088 | 0.010 |
| triQ2A292IQ2A292_FRATH Glycerophosphoryl diestei K.KLGGIFWEPAGNKK.E           | KLGGIFWEP            | 344 | 263 | 3.983 | 0.000 |
| triQ2A292IQ2A292_FRATH Glycerophosphoryl diestei K.LGGIFWEPFAGNK.K            | LGGIFWEPF            | 344 | 264 | 4.387 | 0.000 |
| triQ2A292IQ2A292_FRATH Glycerophosphoryl diestei K.KLGGIFWEPFEKDLTKAGNK.K     | KLGGIFWEPFEKDLTK     | 344 | 270 | 3.036 | 0.000 |
| triQ2A292IQ2A292_FRATH Glycerophosphoryl diestei E.AAKGLDLAGNKK.E             | AAKGLDL              | 344 | 331 | 3.845 | 0.000 |

**Table S2.** Junction peptides identified by MudPIT-LC-MS-MS analysis of *F. tularensis* tmRNA- tagged proteins.

|                                                                                     |                          |     |     |       |       |
|-------------------------------------------------------------------------------------|--------------------------|-----|-----|-------|-------|
| triQ2A292IQ2A292_FRATH Glycerophosphoryl diester E.AAKGLDLPAGNKK.E.N                | AAKGLDLP                 | 344 | 332 | 3.346 | 0.000 |
| triQ2A292IQ2A292_FRATH Glycerophosphoryl diester K.GLDLPPAYPNIPAGNK.K               | GLDLPPAYPNIP             | 344 | 339 | 3.883 | 0.000 |
| triQ2A292IQ2A292_FRATH Glycerophosphoryl diester K.GLDLPPAYPNIPFAGNK.K              | GLDLPPAYPNIPF            | 344 | 340 | 2.705 | 0.000 |
| triQ2A294IQ2A294_FRATH D-alanyl-D-alanine carboxyl K.LLTGIAGLAGNKK.E                | LLTGIAGL                 | 176 | 85  | 3.878 | 0.000 |
| triQ2A294IQ2A294_FRATH D-alanyl-D-alanine carboxyl K.LLTGIAGLLAGNK.K                | LLTGIAGLL                | 176 | 86  | 4.098 | 0.001 |
| triQ2A294IQ2A294_FRATH D-alanyl-D-alanine carboxyl K.LLTGIAGLLFAGNK.K               | LLTGIAGLLF               | 176 | 87  | 4.125 | 0.000 |
| triQ2A2A3IQ2A2A3_FRATH Translation initiation inhibitor E.AVAITNAGNKK.E.N           | AVAITN                   | 126 | 126 | 3.847 | 0.000 |
| triQ2A2A7IQ2A2A7_FRATH Putative uncharacterized K.TTAAEVSAGNKK.E                    | TTAAEVS                  | 169 | 60  | 4.029 | 0.009 |
| triQ2A2A7IQ2A2A7_FRATH Putative uncharacterized E.VSKKLDKTAGNKK.E.N                 | VSKKLDKT                 | 169 | 66  | 4.114 | 0.000 |
| triQ2A2A7IQ2A2A7_FRATH Putative uncharacterized E.VSKKLDKTAGNKKENR.V                | VSKKLDKT                 | 169 | 66  | 3.43  | 0.006 |
| triQ2A2A7IQ2A2A7_FRATH Putative uncharacterized E.VSKKLDKTSKDVEAGNKK.E.N            | VSKKLDKTSKDVE            | 169 | 71  | 3.013 | 0.003 |
| triQ2A2A7IQ2A2A7_FRATH Putative uncharacterized E.VSKKLDKTSKDVEAGNKKENR.V           | VSKKLDKTSKDVE            | 169 | 71  | 2.337 | 0.004 |
| triQ2A2A7IQ2A2A7_FRATH Putative uncharacterized E.VSKKLDKTSKDVEAGNKKENR.V           | VSKKLDKTSKDVEK           | 169 | 72  | 3.624 | 0.000 |
| triQ2A2A7IQ2A2A7_FRATH Putative uncharacterized E.VSKKLDKTSKDVEAGNKK.E.N            | VSKKLDKTSKDVEK           | 169 | 72  | 3.033 | 0.001 |
| triQ2A2A7IQ2A2A7_FRATH Putative uncharacterized E.VSKKLDKTSKDVEKDAGNKK.E.N          | VSKKLDKTSKDVEKD          | 169 | 73  | 3.237 | 0.000 |
| triQ2A2A7IQ2A2A7_FRATH Putative uncharacterized E.VSKKLDKTSKDVEKDAGNKKENR.V         | VSKKLDKTSKDVEKD          | 169 | 73  | 2.277 | 0.000 |
| triQ2A2A7IQ2A2A7_FRATH Putative uncharacterized K.TSKDVEKDAAGNKK.E                  | TSKDVEKDA                | 169 | 74  | 3.921 | 0.000 |
| triQ2A2A7IQ2A2A7_FRATH Putative uncharacterized E.VSKKLDKTSKDVEKDAAGNKKENR.V        | VSKKLDKTSKDVEKDA         | 169 | 74  | 3.394 | 0.000 |
| triQ2A2A7IQ2A2A7_FRATH Putative uncharacterized E.VSKKLDKTSKDVEKDAAGNKK.E.N         | VSKKLDKTSKDVEKDA         | 169 | 74  | 3.026 | 0.000 |
| triQ2A2A7IQ2A2A7_FRATH Putative uncharacterized K.DVEKDASAGNKK.E                    | DVEKDAS                  | 169 | 75  | 3.425 | 0.003 |
| triQ2A2A7IQ2A2A7_FRATH Putative uncharacterized E.VSKKLDKTSKDVEKDASAGNKKENR.V       | VSKKLDKTSKDVEKDAS        | 169 | 75  | 3.577 | 0.010 |
| triQ2A2A7IQ2A2A7_FRATH Putative uncharacterized K.TSKDVEKDASQAGNKK.E                | TSKDVEKDASQ              | 169 | 76  | 3.302 | 0.001 |
| triQ2A2A7IQ2A2A7_FRATH Putative uncharacterized K.TSKDVEKDASQAAGNKK.E               | TSKDVEKDASQA             | 169 | 77  | 3.382 | 0.000 |
| triQ2A2A7IQ2A2A7_FRATH Putative uncharacterized E.VSKKLDKTSKDVEKDASQAAGNKK.E.N      | VSKKLDKTSKDVEKDASQA      | 169 | 77  | 3.374 | 0.001 |
| triQ2A2A7IQ2A2A7_FRATH Putative uncharacterized K.DASQAADAGNKK.E                    | DASQAAD                  | 169 | 79  | 2.877 | 0.001 |
| triQ2A2A7IQ2A2A7_FRATH Putative uncharacterized E.VSKKLDKTSKDVEKDASQAADAGNKK.E.N    | VSKKLDKTSKDVEKDASQAAD    | 169 | 79  | 3.635 | 0.001 |
| triQ2A2A7IQ2A2A7_FRATH Putative uncharacterized E.VSKKLDKTSKDVEKDASQAADAGNK.K       | VSKKLDKTSKDVEKDASQAAD    | 169 | 79  | 3.256 | 0.000 |
| triQ2A2A7IQ2A2A7_FRATH Putative uncharacterized K.DASQAADIAGNKK.E                   | DASQAADI                 | 169 | 80  | 4.002 | 0.000 |
| triQ2A2A7IQ2A2A7_FRATH Putative uncharacterized K.TSKDVEKDASQAADIAGNKK.E            | TSKDVEKDASQAADI          | 169 | 80  | 3.18  | 0.001 |
| triQ2A2A7IQ2A2A7_FRATH Putative uncharacterized E.VSKKLDKTSKDVEKDASQAADIAGNKK.E.N   | VSKKLDKTSKDVEKDASQAADI   | 169 | 80  | 3.219 | 0.010 |
| triQ2A2A7IQ2A2A7_FRATH Putative uncharacterized K.DASQAADILVAGNKK.E                 | DASQAADILV               | 169 | 82  | 4.115 | 0.000 |
| triQ2A2A7IQ2A2A7_FRATH Putative uncharacterized K.DVEKDASQAADILVAGNKK.E             | DVEKDASQAADILV           | 169 | 82  | 3.02  | 0.000 |
| triQ2A2A7IQ2A2A7_FRATH Putative uncharacterized E.VSKKLDKTSKDVEKDASQAADILVAGNKK.E.N | VSKKLDKTSKDVEKDASQAADILV | 169 | 82  | 3.68  | 0.003 |

**Table S2.** Junction peptides identified by MudPIT-LC-MS-MS analysis of *F. tularensis* tmRNA- tagged proteins.

|                                                 |                                    |                          |     |     |       |       |
|-------------------------------------------------|------------------------------------|--------------------------|-----|-----|-------|-------|
| triQ2A2A7IQ2A2A7_FRATH Putative uncharacterized | K.KILNTAGNKK.E                     | KILNT                    | 169 | 94  | 2.634 | 0.005 |
| triQ2A2A7IQ2A2A7_FRATH Putative uncharacterized | E.NAKKILNTAGNKKE.N                 | NAKKILNT                 | 169 | 94  | 4.239 | 0.001 |
| triQ2A2A7IQ2A2A7_FRATH Putative uncharacterized | K.ANQASQSLAGNKK.E                  | ANQASQSL                 | 169 | 103 | 3.665 | 0.000 |
| triQ2A2A7IQ2A2A7_FRATH Putative uncharacterized | K.ANQASQSLGAGNKK.E                 | ANQASQSLG                | 169 | 104 | 3.373 | 0.004 |
| triQ2A2A7IQ2A2A7_FRATH Putative uncharacterized | E.NAKKILNTKANQASQSLGAGNK.K         | NAKKILNTKANQASQSLG       | 169 | 104 | 2.768 | 0.000 |
| triQ2A2A7IQ2A2A7_FRATH Putative uncharacterized | K.ANQASQSLGQAGNKK.E                | ANQASQSLGQ               | 169 | 105 | 3.958 | 0.000 |
| triQ2A2A7IQ2A2A7_FRATH Putative uncharacterized | K.ANQASQSLGQMAGNKK.E               | ANQASQSLGQM              | 169 | 106 | 3.9   | 0.000 |
| triQ2A2A7IQ2A2A7_FRATH Putative uncharacterized | K.ANQASQSLGQMAAGNKK.E              | ANQASQSLGQMA             | 169 | 107 | 3.831 | 0.000 |
| triQ2A2A7IQ2A2A7_FRATH Putative uncharacterized | K.ANQASQSLGQMAAGNK.K               | ANQASQSLGQMA             | 169 | 107 | 2.838 | 0.000 |
| triQ2A2A7IQ2A2A7_FRATH Putative uncharacterized | K.ANQASQSLGQMADAGNKK.E             | ANQASQSLGQMAD            | 169 | 108 | 4.054 | 0.000 |
| triQ2A2A7IQ2A2A7_FRATH Putative uncharacterized | K.ANQASQSLGQMADDAEKDTSQAAAGNKK.E   | ANQASQSLGQMADDAEKDTSQAA  | 169 | 118 | 3.695 | 0.000 |
| triQ2A2A7IQ2A2A7_FRATH Putative uncharacterized | K.ANQASQSLGQMADDAEKDTSQAATAGNKK.E  | ANQASQSLGQMADDAEKDTSQAAT | 169 | 119 | 3.318 | 0.000 |
| triQ2A2A7IQ2A2A7_FRATH Putative uncharacterized | D.TSQAATTIAGNKK.E                  | TSQAATTIA                | 169 | 122 | 3.365 | 0.000 |
| triQ2A2A7IQ2A2A7_FRATH Putative uncharacterized | D.TSQAATTIANKAGNKKE.N              | TSQAATTIANK              | 169 | 124 | 2.218 | 0.000 |
| triQ2A2A7IQ2A2A7_FRATH Putative uncharacterized | K.AAQSKLVQQTDKAGNKKE.N             | AAQSKLVQQTDK             | 169 | 138 | 2.734 | 0.000 |
| triQ2A2A7IQ2A2A7_FRATH Putative uncharacterized | K.LVQQTDKAGNK.K                    | LVQQTDK                  | 169 | 138 | 3.053 | 0.003 |
| triQ2A2A7IQ2A2A7_FRATH Putative uncharacterized | K.LVQQTDKAGNKKE.E                  | LVQQTDK                  | 169 | 138 | 2.755 | 0.000 |
| triQ2A2A7IQ2A2A7_FRATH Putative uncharacterized | E.KTVTNSQDKVQAGNK.K                | KTVTNSQDKVQ              | 169 | 155 | 2.774 | 0.000 |
| triQ2A2A7IQ2A2A7_FRATH Putative uncharacterized | K.TVTNSQDKVQAGNKK.E                | TVTNSQDKVQ               | 169 | 155 | 4.081 | 0.001 |
| triQ2A2A7IQ2A2A7_FRATH Putative uncharacterized | E.KTVTNSQDKVQNAGNKKE.N             | KTVTNSQDKVQN             | 169 | 156 | 2.598 | 0.005 |
| triQ2A2A7IQ2A2A7_FRATH Putative uncharacterized | E.KTVTNSQDKVQNAGNKK.E              | KTVTNSQDKVQN             | 169 | 156 | 2.549 | 0.000 |
| triQ2A2A7IQ2A2A7_FRATH Putative uncharacterized | K.TVTNSQDKVQNAGNKK.E               | TVTNSQDKVQN              | 169 | 156 | 3.605 | 0.000 |
| triQ2A2A7IQ2A2A7_FRATH Putative uncharacterized | E.KTVTNSQDKVQNFAGNKKE.N            | KTVTNSQDKVQNF            | 169 | 157 | 3.133 | 0.007 |
| triQ2A2A7IQ2A2A7_FRATH Putative uncharacterized | E.KTVTNSQDKVQNFQAGNKKE.N           | KTVTNSQDKVQNFQ           | 169 | 159 | 2.73  | 0.000 |
| triQ2A2A7IQ2A2A7_FRATH Putative uncharacterized | E.KTVTNSQDKVQNFQAGNKKKE.N          | KTVTNSQDKVQNFQ           | 169 | 160 | 2.514 | 0.001 |
| triQ2A2A7IQ2A2A7_FRATH Putative uncharacterized | E.KTVTNSQDKVQNFQGFAGNKKE.N         | KTVTNSQDKVQNFQGF         | 169 | 161 | 2.939 | 0.000 |
| triQ2A2A7IQ2A2A7_FRATH Putative uncharacterized | E.KTVTNSQDKVQNFQGFADAGNKKE.N       | KTVTNSQDKVQNFQGF         | 169 | 162 | 2.933 | 0.000 |
| triQ2A2A7IQ2A2A7_FRATH Putative uncharacterized | E.KTVTNSQDKVQNFQGFDDGSAGNKKE.N     | KTVTNSQDKVQNFQGFDDGS     | 169 | 165 | 2.994 | 0.000 |
| triQ2A2A7IQ2A2A7_FRATH Putative uncharacterized | E.KTVTNSQDKVQNFQGFDDGSDNTFAGNKKE.N | KTVTNSQDKVQNFQGFDDGSDNTF | 169 | 169 | 3.363 | 0.000 |
| triQ2A2B3IQ2A2B3_FRATH Cytidine deaminase FTL_  | K.ELLPYIFSAGNKK.E                  | ELLPYIFS                 | 133 | 132 | 4.008 | 0.000 |
| triQ2A2B3IQ2A2B3_FRATH Cytidine deaminase FTL_  | K.ELLPYIFSAGNK.K                   | ELLPYIFS                 | 133 | 132 | 4.002 | 0.000 |
| triQ2A2B3IQ2A2B3_FRATH Cytidine deaminase FTL_  | E.LLPYIFSAGNKKE.N                  | LLPYIFS                  | 133 | 132 | 4.265 | 0.001 |
| triQ2A2B3IQ2A2B3_FRATH Cytidine deaminase FTL_  | K.ELLPYIFSLAGNKK.E                 | ELLPYIFSL                | 133 | 133 | 4.359 | 0.000 |

**Table S2.** Junction peptides identified by MudPIT-LC-MS-MS analysis of *F. tularensis* tmRNA- tagged proteins.

|                                                                              |                       |     |     |       |       |
|------------------------------------------------------------------------------|-----------------------|-----|-----|-------|-------|
| triQ2A2B3IQ2A2B3_FRATH Cytidine deaminase FTL_` K.ELLPYIFSLAGNK.K            | ELLPYIFSL             | 133 | 133 | 3.298 | 0.000 |
| triQ2A2C3IQ2A2C3_FRATH Inosine-5-monophosphate E.SHVHNVAGNK.K                | SHVHNV                | 486 | 475 | 2.835 | 0.000 |
| triQ2A2C3IQ2A2C3_FRATH Inosine-5-monophosphate R.TEPTFVQITGAGFNESHVHNVAGNK.K | TEPTFVQITGAGFNESHVHNV | 486 | 475 | 2.519 | 0.002 |
| triQ2A2C3IQ2A2C3_FRATH Inosine-5-monophosphate E.SHVHNVITITKAGNK.K           | SHVHNVITITK           | 486 | 479 | 3.686 | 0.000 |
| triQ2A2C4IQ2A2C4_FRATH Thiamine pyrophosphokin E.FIDIYSRYFFAGNK.K            | FIDIYSRYFF            | 217 | 134 | 2.386 | 0.009 |
| triQ2A2C8IQ2A2C8_FRATH DNA excision repair enzyr R.FKPKKENEQRAGNK.K          | FKPKKENEQR            | 940 | 217 | 4.203 | 0.003 |
| triQ2A2E7IQ2A2E7_FRATH Major facilitator superfam *.IKNMIAAAAGNK.K           | IKNMIAAA              | 404 | 356 | 2.88  | 0.001 |
| triQ2A2F5IQ2A2F5_FRATH Enoyl-[acyl-carrier-proteir K.VWDGLDAIVHSIAFAGNK.K    | VWDGLDAIVHSIAF        | 260 | 93  | 4.168 | 0.000 |
| triQ2A2F5IQ2A2F5_FRATH Enoyl-[acyl-carrier-proteir E.VVHVDAGAGNKKE.N         | VVHVDAG               | 260 | 250 | 4.185 | 0.000 |
| triQ2A2F5IQ2A2F5_FRATH Enoyl-[acyl-carrier-proteir E.VVHVDAGYAGNKKE.N        | VVHVDAGY              | 260 | 251 | 4.24  | 0.000 |
| triQ2A2G0IQ2A2G0_FRATH Putative uncharacterized D.LVNELNSITAGNKK.E           | LVNELNSIT             | 269 | 262 | 3.201 | 0.008 |
| triQ2A2G7IQ2A2G7_FRATH UDP-glucose 4-epimerase R.DYIHVVDLAIGHILAGNKK.E       | DYIHVVDLAIGHIL        | 339 | 246 | 3.287 | 0.000 |
| triQ2A2K4IQ2A2K4_FRATH Peptidyl-prolyl cis-trans is K.VHGPVQTQAGNKK.E        | VHGPVQTQ              | 92  | 80  | 4.142 | 0.000 |
| triQ2A2K5IQ2A2K5_FRATH Cold-shock DEAD-box pro K.DFSQLGLNQDIVDTVIAGNKK.E     | DFSQLGLNQDIVDTVI      | 569 | 23  | 2.117 | 0.006 |
| triQ2A2L3IQ2A2L3_FRATH Glutathione peroxidase F1 K.TIPEDLIPDIDNFLAGNK.K      | TIPEDLIPDIDNFL        | 156 | 154 | 3.421 | 0.001 |
| triQ2A2M0IQ2A2M0_FRATH Putative uncharacterized D.FKYEKDFTTFGAGNK.K          | FKYEKDFTTFG           | 287 | 276 | 2.301 | 0.002 |
| triQ2A2M0IQ2A2M0_FRATH Putative uncharacterized K.YEKDFTTFGAGNKKE.N          | YEKDFTTFG             | 287 | 276 | 3.419 | 0.003 |
| triQ2A2Q0IQ2A2Q0_FRATH Prephenate dehydratase I *.IFEKNKRNHAGNKK.E           | IFEKNKRNH             | 280 | 147 | 2.05  | 0.005 |
| triQ2A2Q8IQ2A2Q8_FRATH Outer membrane associat K.YFAVQYNQAGNKK.E             | YFAVQYNQ              | 392 | 115 | 4.173 | 0.000 |
| triQ2A2Q8IQ2A2Q8_FRATH Outer membrane associat K.YFAVQYNQAGNK.K              | YFAVQYNQ              | 392 | 115 | 4.04  | 0.000 |
| triQ2A2Q8IQ2A2Q8_FRATH Outer membrane associat K.YFAVQYNQLAGNK.K             | YFAVQYNQL             | 392 | 116 | 4.112 | 0.000 |
| triQ2A2Q8IQ2A2Q8_FRATH Outer membrane associat K.YFAVQYNQLAGNKK.E            | YFAVQYNQL             | 392 | 116 | 4.046 | 0.003 |
| triQ2A2Q8IQ2A2Q8_FRATH Outer membrane associat K.YFAVQYNQLVAGNKK.E           | YFAVQYNQLV            | 392 | 117 | 4.296 | 0.000 |
| triQ2A2Q8IQ2A2Q8_FRATH Outer membrane associat K.YFAVQYNQLVAGNK.K            | YFAVQYNQLV            | 392 | 117 | 4.248 | 0.000 |
| triQ2A2Q8IQ2A2Q8_FRATH Outer membrane associat K.YFAVQYNQLVGAGNK.K           | YFAVQYNQLVG           | 392 | 118 | 4.297 | 0.000 |
| triQ2A2Q8IQ2A2Q8_FRATH Outer membrane associat K.YFAVQYNQLVGAGNKK.E          | YFAVQYNQLVG           | 392 | 118 | 4.256 | 0.000 |
| triQ2A2Q8IQ2A2Q8_FRATH Outer membrane associat R.VFAGLGEGAGNKK.E             | VFAGLGEG              | 392 | 127 | 4.366 | 0.000 |
| triQ2A2Q8IQ2A2Q8_FRATH Outer membrane associat R.VFAGLGEGVAGNKK.E            | VFAGLGEGV             | 392 | 128 | 4.022 | 0.000 |
| triQ2A2Q8IQ2A2Q8_FRATH Outer membrane associat R.VFAGLGEGVVAGNKK.E           | VFAGLGEGVV            | 392 | 129 | 4.24  | 0.000 |
| triQ2A2Q8IQ2A2Q8_FRATH Outer membrane associat E.GVVNAGNKKE.N                | GVVN                  | 392 | 130 | 3.568 | 0.009 |
| triQ2A2Q8IQ2A2Q8_FRATH Outer membrane associat R.VFAGLGEGVVNAGNKK.E          | VFAGLGEGVVN           | 392 | 130 | 4.388 | 0.000 |
| triQ2A2Q8IQ2A2Q8_FRATH Outer membrane associat R.VFAGLGEGVVNAGNK.K           | VFAGLGEGVVN           | 392 | 130 | 3.617 | 0.000 |
| triQ2A2Q8IQ2A2Q8_FRATH Outer membrane associat E.GVVNFAGNKKE.N               | GVVNF                 | 392 | 131 | 3.356 | 0.002 |





**Table S2.** Junction peptides identified by MudPIT-LC-MS-MS analysis of *F. tularensis* tmRNA- tagged proteins.

|                                                    |                                 |                       |     |     |       |       |
|----------------------------------------------------|---------------------------------|-----------------------|-----|-----|-------|-------|
| triQ2A2S5IQ2A2S5_FRATH Putative uncharacterized    | E.DALWAVNFAGNKKE.N              | DALWAVNF              | 353 | 79  | 4.184 | 0.001 |
| triQ2A2S5IQ2A2S5_FRATH Putative uncharacterized    | K.LALEDALWAVNFAGNKK.E           | LALEDALWAVNF          | 353 | 79  | 4.217 | 0.000 |
| triQ2A2S5IQ2A2S5_FRATH Putative uncharacterized    | E.DALWAVNFYQKAGNKKE.N           | DALWAVNFYQK           | 353 | 82  | 2.563 | 0.010 |
| triQ2A2S5IQ2A2S5_FRATH Putative uncharacterized    | E.DALWAVNFYQKNGAAGNKKE.N        | DALWAVNFYQKNGA        | 353 | 85  | 3.095 | 0.000 |
| triQ2A2S5IQ2A2S5_FRATH Putative uncharacterized    | R.LYSYLVYLIGELAGNKKE.E          | LYSYLVYLIGEL          | 353 | 105 | 4.454 | 0.000 |
| triQ2A2S5IQ2A2S5_FRATH Putative uncharacterized    | E.LDHISPVETGAGNKKE.N            | LDHISPVETG            | 353 | 236 | 3.837 | 0.001 |
| triQ2A2S5IQ2A2S5_FRATH Putative uncharacterized    | R.EAIQQPYPAPFVVIADAGNKKE.N      | EAIQQPYPAPFVVIAD      | 353 | 271 | 2.878 | 0.000 |
| triQ2A2T7IQ2A2T7_FRATH Short-chain dehydrogenase   | R.ILPTNILDNFLAGNK.K             | ILPTNILDNFL           | 274 | 271 | 3.727 | 0.000 |
| triQ2A2W1IQ2A2W1_FRATH Putative uncharacterized    | E.IVFSVDDFLEVHLAGNK.K           | IVFSVDDFLEVHL         | 166 | 47  | 2.932 | 0.001 |
| triQ2A2W3IQ2A2W3_FRATH 2-amino-4-hydroxy-6-hyd *   | M.QYIIGIGTNSAGNKKE.E            | MQYIIGIGTNS           | 421 | 11  | 2.147 | 0.002 |
| triQ2A2X0IQ2A2X0_FRATH ATP-dependent RNA helicase  | D.QPKAQANRIKAGNK.K              | QPKAQANRIK            | 441 | 75  | 2.676 | 0.002 |
| triQ2A2X4IQ2A2X4_FRATH Pyruvate/2-oxoglutarate     | E.LVTLVAGNKKE.E                 | LVTLV                 | 453 | 453 | 2.935 | 0.009 |
| triQ2A2Y3IQ2A2Y3_FRATH Signal recognition particle | K.KSLTPDQAGNKKE.E               | KSLTPDQ               | 458 | 72  | 3.582 | 0.000 |
| triQ2A2Y3IQ2A2Y3_FRATH Signal recognition particle | K.KSLTPDQAGNK.K                 | KSLTPDQ               | 458 | 72  | 3.233 | 0.008 |
| triQ2A2Y3IQ2A2Y3_FRATH Signal recognition particle | K.KSLTPDQAGNKENR.V              | KSLTPDQ               | 458 | 72  | 2.154 | 0.003 |
| triQ2A2Z0IQ2A2Z0_FRATH Putative uncharacterized    | K.VLNSQLLSAGNKKE.E              | VLNSQLLS              | 136 | 119 | 3.322 | 0.006 |
| triQ2A2Z4IQ2A2Z4_FRATH Putative uncharacterized    | E.TTVKSDSILAGNKKE.N             | TTVKSDSIL             | 229 | 49  | 4.041 | 0.000 |
| triQ2A2Z4IQ2A2Z4_FRATH Putative uncharacterized    | E.TTVKSDSILVAGNKKE.N            | TTVKSDSILV            | 229 | 50  | 4.393 | 0.000 |
| triQ2A2Z4IQ2A2Z4_FRATH Putative uncharacterized    | E.TTVKSDSILVQVAGNKKE.N          | TTVKSDSILVQV          | 229 | 52  | 4.275 | 0.000 |
| triQ2A2Z4IQ2A2Z4_FRATH Putative uncharacterized    | D.SILVQVTAGNKKE.N               | SILVQVT               | 229 | 53  | 3.927 | 0.000 |
| triQ2A2Z4IQ2A2Z4_FRATH Putative uncharacterized    | E.TTVKSDSILVQVTAGNKKE.N         | TTVKSDSILVQVT         | 229 | 53  | 2.955 | 0.001 |
| triQ2A2Z4IQ2A2Z4_FRATH Putative uncharacterized    | K.SDSILVQVTGAGNKKE.E            | SDSILVQVTG            | 229 | 54  | 3.964 | 0.000 |
| triQ2A2Z4IQ2A2Z4_FRATH Putative uncharacterized    | D.SILVQVTGAGNKKE.N              | SILVQVTG              | 229 | 54  | 3.832 | 0.000 |
| triQ2A2Z4IQ2A2Z4_FRATH Putative uncharacterized    | E.TTVKSDSILVQVTGAGNKKE.N        | TTVKSDSILVQVTG        | 229 | 54  | 4.145 | 0.000 |
| triQ2A2Z4IQ2A2Z4_FRATH Putative uncharacterized    | E.TTVKSDSILVQVTGYATAGNKKE.N     | TTVKSDSILVQVTGYAT     | 229 | 57  | 3.445 | 0.000 |
| triQ2A2Z4IQ2A2Z4_FRATH Putative uncharacterized    | E.TTVKSDSILVQVTGYATTTAGNKKE.N   | TTVKSDSILVQVTGYATTT   | 229 | 59  | 3.325 | 0.000 |
| triQ2A2Z4IQ2A2Z4_FRATH Putative uncharacterized    | E.TTVKSDSILVQVTGYATTTLEAGNKKE.E | TTVKSDSILVQVTGYATTTLE | 229 | 61  | 3.316 | 0.000 |
| triQ2A2Z4IQ2A2Z4_FRATH Putative uncharacterized    | E.KQNDVEKQJAGNKKE.N             | KQNDVEKQJ             | 229 | 70  | 3.535 | 0.000 |
| triQ2A2Z4IQ2A2Z4_FRATH Putative uncharacterized    | E.KQNDVEKQJSAGNKKE.N            | KQNDVEKQJS            | 229 | 71  | 3.889 | 0.000 |
| triQ2A2Z4IQ2A2Z4_FRATH Putative uncharacterized    | E.KQNDVEKQJSDAGNKKE.N           | KQNDVEKQJSD           | 229 | 72  | 3.971 | 0.000 |
| triQ2A2Z4IQ2A2Z4_FRATH Putative uncharacterized    | E.KQISDNVAGNKKE.N               | KQISDNV               | 229 | 74  | 3.807 | 0.006 |
| triQ2A2Z4IQ2A2Z4_FRATH Putative uncharacterized    | E.KQISDNVNAGNKKE.N              | KQISDNVN              | 229 | 75  | 3.474 | 0.005 |
| triQ2A2Z4IQ2A2Z4_FRATH Putative uncharacterized    | E.KQNDVEKQJSDNVNAGNKKE.N        | KQNDVEKQJSDNVN        | 229 | 75  | 3.89  | 0.000 |

**Table S2.** Junction peptides identified by MudPIT-LC-MS-MS analysis of *F. tularensis* tmRNA- tagged proteins.

|                                                                              |                      |     |     |       |       |
|------------------------------------------------------------------------------|----------------------|-----|-----|-------|-------|
| triQ2A2Z4IQ2A2Z4_FRATH Putative uncharacterized E.KQISDNVNNAGNKKE.N          | KQISDNVNN            | 229 | 76  | 3.851 | 0.000 |
| triQ2A2Z4IQ2A2Z4_FRATH Putative uncharacterized E.KQISDNVNNIAGNKKE.N         | KQISDNVNNI           | 229 | 77  | 3.924 | 0.000 |
| triQ2A2Z4IQ2A2Z4_FRATH Putative uncharacterized E.KQNDVEKQISDNVNNIAGNKKE.N   | KQNDVEKQISDNVNNI     | 229 | 77  | 3.03  | 0.002 |
| triQ2A2Z4IQ2A2Z4_FRATH Putative uncharacterized K.QISDNVNNIAGNKKE            | QISDNVNNI            | 229 | 77  | 2.276 | 0.003 |
| triQ2A2Z4IQ2A2Z4_FRATH Putative uncharacterized E.KQISDNVNNIVAGNKKE.N        | KQISDNVNNIV          | 229 | 78  | 4.064 | 0.001 |
| triQ2A2Z4IQ2A2Z4_FRATH Putative uncharacterized E.KQNDVEKQISDNVNNIVAGNKKE.N  | KQNDVEKQISDNVNNIV    | 229 | 78  | 3.109 | 0.003 |
| triQ2A2Z4IQ2A2Z4_FRATH Putative uncharacterized E.KQISDNVNNIVKAGNKKE.N       | KQISDNVNNIVK         | 229 | 79  | 2.8   | 0.001 |
| triQ2A2Z4IQ2A2Z4_FRATH Putative uncharacterized E.KQNDVEKQISDNVNNIVKAGNKKE.N | KQNDVEKQISDNVNNIVK   | 229 | 79  | 3.112 | 0.000 |
| triQ2A2Z4IQ2A2Z4_FRATH Putative uncharacterized E.KQNDVEKQISDNVNNIVKSEAGNKKE | KQNDVEKQISDNVNNIVKSE | 229 | 81  | 2.816 | 0.000 |
| triQ2A2Z4IQ2A2Z4_FRATH Putative uncharacterized K.VKNIEQTAGNKKE              | VKNIEQT              | 229 | 90  | 3.637 | 0.001 |
| triQ2A2Z4IQ2A2Z4_FRATH Putative uncharacterized K.NIEQTTAGNKKE               | NIEQTT               | 229 | 91  | 3.709 | 0.000 |
| triQ2A2Z4IQ2A2Z4_FRATH Putative uncharacterized K.VKNIEQTTAGNKKE             | VKNIEQTT             | 229 | 91  | 3.856 | 0.000 |
| triQ2A2Z4IQ2A2Z4_FRATH Putative uncharacterized K.NIEQTTSAGNKKE              | NIEQTTS              | 229 | 92  | 2.948 | 0.002 |
| triQ2A2Z4IQ2A2Z4_FRATH Putative uncharacterized K.NIEQTTSNAGNKKE             | NIEQTTSN             | 229 | 93  | 3.657 | 0.000 |
| triQ2A2Z4IQ2A2Z4_FRATH Putative uncharacterized K.VKNIEQTTSNAGNKKE           | VKNIEQTTSN           | 229 | 93  | 3.929 | 0.000 |
| triQ2A2Z4IQ2A2Z4_FRATH Putative uncharacterized K.NIEQTTSNSGAAGNKKE          | NIEQTTSNSGA          | 229 | 96  | 3.529 | 0.000 |
| triQ2A2Z4IQ2A2Z4_FRATH Putative uncharacterized K.NIEQTTSNSGAIAGNKKE         | NIEQTTSNSGAI         | 229 | 97  | 4.036 | 0.000 |
| triQ2A2Z4IQ2A2Z4_FRATH Putative uncharacterized K.VKNIEQTTSNSGAIAGNKKE       | VKNIEQTTSNSGAI       | 229 | 97  | 3.768 | 0.000 |
| triQ2A2Z4IQ2A2Z4_FRATH Putative uncharacterized K.NIEQTTSNSGAINAGNKKE        | NIEQTTSNSGAIN        | 229 | 98  | 4.061 | 0.000 |
| triQ2A2Z4IQ2A2Z4_FRATH Putative uncharacterized R.ISQSDLNAGNKKE              | ISQSDLN              | 229 | 113 | 4.038 | 0.000 |
| triQ2A2Z4IQ2A2Z4_FRATH Putative uncharacterized R.ISQSDLNAGNKKE              | ISQSDLNN             | 229 | 114 | 3.969 | 0.001 |
| triQ2A2Z4IQ2A2Z4_FRATH Putative uncharacterized R.ISQSDLNQLAGNKKE            | ISQSDLNNLQ           | 229 | 116 | 4.105 | 0.000 |
| triQ2A2Z4IQ2A2Z4_FRATH Putative uncharacterized R.LVVDVLDAGNKKE              | LVVDVLD              | 229 | 136 | 4.236 | 0.006 |
| triQ2A2Z4IQ2A2Z4_FRATH Putative uncharacterized R.LVVDVLDYAGNKKE             | LVVDVLDY             | 229 | 137 | 4.225 | 0.000 |
| triQ2A2Z4IQ2A2Z4_FRATH Putative uncharacterized R.LVVDVLDYAGNKKE             | LVVDVLDY             | 229 | 137 | 3.168 | 0.000 |
| triQ2A2Z4IQ2A2Z4_FRATH Putative uncharacterized R.LVVDVLDYAGNKKE             | LVVDVLDYN            | 229 | 138 | 4.411 | 0.000 |
| triQ2A2Z4IQ2A2Z4_FRATH Putative uncharacterized R.LVVDVLDYAGNKKE             | LVVDVLDYNP           | 229 | 139 | 4.448 | 0.000 |
| triQ2A2Z4IQ2A2Z4_FRATH Putative uncharacterized R.LVVDVLDYAGNKKE             | LVVDVLDYNP           | 229 | 140 | 4.4   | 0.000 |
| triQ2A2Z4IQ2A2Z4_FRATH Putative uncharacterized R.LVVDVLDYAGNKKE             | LVVDVLDYNP           | 229 | 141 | 4.444 | 0.000 |
| triQ2A2Z4IQ2A2Z4_FRATH Putative uncharacterized R.LVVDVLDYAGNKKE             | LVVDVLDYNP           | 229 | 141 | 4.364 | 0.000 |
| triQ2A2Z4IQ2A2Z4_FRATH Putative uncharacterized K.LFNDTKDYLAAGNKKE           | LFNDTKDYLA           | 229 | 164 | 3.031 | 0.000 |
| triQ2A2Z4IQ2A2Z4_FRATH Putative uncharacterized K.LFNDTKDYLANAGNKKE          | LFNDTKDYLAN          | 229 | 165 | 3.818 | 0.000 |
| triQ2A2Z4IQ2A2Z4_FRATH Putative uncharacterized K.LFNDTKDYLANFAGNKKE         | LFNDTKDYLANF         | 229 | 166 | 4.262 | 0.000 |

**Table S2.** Junction peptides identified by MudPIT-LC-MS-MS analysis of *F. tularensis* tmRNA- tagged proteins.

|                                                 |                                       |                               |      |     |       |       |
|-------------------------------------------------|---------------------------------------|-------------------------------|------|-----|-------|-------|
| triQ2A2Z4IQ2A2Z4_FRATH Putative uncharacterized | K.DYLANFNKAGNK.K                      | DYLANFNK                      | 229  | 168 | 3.871 | 0.000 |
| triQ2A2Z4IQ2A2Z4_FRATH Putative uncharacterized | K.LFNDDTKDYLANFNKAGNK.K               | LFNDDTKDYLANFNK               | 229  | 168 | 3.208 | 0.001 |
| triQ2A2Z4IQ2A2Z4_FRATH Putative uncharacterized | K.QTNSNYTIQSAGNKK.E                   | QTNSNYTIQS                    | 229  | 178 | 3.49  | 0.000 |
| triQ2A2Z4IQ2A2Z4_FRATH Putative uncharacterized | K.QTNSNYTIQSIQAGNKK.E                 | QTNSNYTIQSIQ                  | 229  | 180 | 3.416 | 0.000 |
| triQ2A2Z4IQ2A2Z4_FRATH Putative uncharacterized | K.QTNSNYTIQSIQAGNK.K                  | QTNSNYTIQSIQ                  | 229  | 180 | 2.691 | 0.000 |
| triQ2A2Z4IQ2A2Z4_FRATH Putative uncharacterized | K.TAYSGDAAGNKK.E                      | TAYSGDA                       | 229  | 204 | 3.742 | 0.002 |
| triQ2A2Z4IQ2A2Z4_FRATH Putative uncharacterized | K.TAYSGDANSNSSNPAGNKK.E               | TAYSGDANSSSNP                 | 229  | 211 | 4.079 | 0.006 |
| triQ2A2Z4IQ2A2Z4_FRATH Putative uncharacterized | K.TAYSGDANSSSNPVAVTQAGNK.K            | TAYSGDANSSSNPVAVTQ            | 229  | 216 | 4.072 | 0.000 |
| triQ2A2Z4IQ2A2Z4_FRATH Putative uncharacterized | D.INIKANVAGNKK.E                      | INIKANV                       | 229  | 224 | 3.917 | 0.009 |
| triQ2A306IQ2A306_FRATH Putative uncharacterized | D.WKKIDAGAGNKK.E                      | WKKIDAG                       | 631  | 304 | 2.982 | 0.003 |
| triQ2A319IQ2A319_FRATH Cobalamin (Vitamin B12)  | K.LPVTVLSGFLAGNK.K                    | LPVTVLSGFL                    | 405  | 13  | 4.284 | 0.000 |
| triQ2A319IQ2A319_FRATH Cobalamin (Vitamin B12)  | R.SFVYHSINPAGNK.K                     | SFVYHSINP                     | 405  | 268 | 3.593 | 0.000 |
| triQ2A347IQ2A347_FRATH Putative uncharacterized | D.NNELPLIAAGNK.K                      | NNELPLIA                      | 1093 | 100 | 2.848 | 0.002 |
| triQ2A355IQ2A355_FRATH Putative uncharacterized | K.NISLNNFVAGNKK.E                     | NISLNNFV                      | 257  | 36  | 2.243 | 0.009 |
| triQ2A357IQ2A357_FRATH Putative uncharacterized | K.KNATIFLNLNEFC+57AGNKK.E             | KNATIFLNLNEFC                 | 191  | 51  | 3.209 | 0.000 |
| triQ2A357IQ2A357_FRATH Putative uncharacterized | E.FC+57PTNIAAAGNKK.E                  | FCPTNIAA                      | 191  | 57  | 3.665 | 0.000 |
| triQ2A357IQ2A357_FRATH Putative uncharacterized | K.KNATIFLNLNEFCPTNIAACKDENDAGNKK.E    | KNATIFLNLNEFCPTNIAACKDEND     | 191  | 63  | 2.172 | 0.000 |
| triQ2A357IQ2A357_FRATH Putative uncharacterized | K.NATIFLNLNEFC+57PTNIAACKDENDNCCIYTEL | NATIFLNLNEFCPTNIAACKDENDNCCIY | 191  | 72  | 2.001 | 0.000 |
| triQ2A357IQ2A357_FRATH Putative uncharacterized | R.IYYYLAVAGNK.K                       | IYYYLAV                       | 191  | 86  | 4.043 | 0.001 |
| triQ2A357IQ2A357_FRATH Putative uncharacterized | R.IYYYLAVAGNKK.E                      | IYYYLAV                       | 191  | 86  | 4.043 | 0.000 |
| triQ2A357IQ2A357_FRATH Putative uncharacterized | R.IYYYLAVPAGNKK.E                     | IYYYLAVP                      | 191  | 87  | 4.437 | 0.000 |
| triQ2A357IQ2A357_FRATH Putative uncharacterized | R.IYYYLAVPIAGNKK.E                    | IYYYLAVPI                     | 191  | 88  | 4.383 | 0.000 |
| triQ2A357IQ2A357_FRATH Putative uncharacterized | R.IYYYLAVPIAGNK.K                     | IYYYLAVPI                     | 191  | 88  | 3.915 | 0.000 |
| triQ2A357IQ2A357_FRATH Putative uncharacterized | R.IYYYLAVPITAGNK.K                    | IYYYLAVPIT                    | 191  | 89  | 4.125 | 0.000 |
| triQ2A357IQ2A357_FRATH Putative uncharacterized | R.IYYYLAVPITAGNKK.E                   | IYYYLAVPIT                    | 191  | 89  | 3.368 | 0.000 |
| triQ2A357IQ2A357_FRATH Putative uncharacterized | K.DLTILYKHDKEESAGNKK.E                | DLTILYKHDKEES                 | 191  | 107 | 3.052 | 0.000 |
| triQ2A357IQ2A357_FRATH Putative uncharacterized | K.DLTILYKHDKEESPAGNKK.E               | DLTILYKHDKEESP                | 191  | 108 | 3.216 | 0.000 |
| triQ2A357IQ2A357_FRATH Putative uncharacterized | K.HDKEESPAGNKK.E                      | HDKEESP                       | 191  | 109 | 2.222 | 0.003 |
| triQ2A357IQ2A357_FRATH Putative uncharacterized | K.HDKEESPPEAGNKK.E                    | HDKEESPPE                     | 191  | 110 | 3.775 | 0.000 |
| triQ2A357IQ2A357_FRATH Putative uncharacterized | *.DLTILYKHDKEESPPEAAGNKK.E            | DLTILYKHDKEESPPEA             | 191  | 111 | 3.581 | 0.000 |
| triQ2A357IQ2A357_FRATH Putative uncharacterized | K.HDKEESPPEAAGNKK.E                   | HDKEESPPEA                    | 191  | 111 | 4.023 | 0.000 |
| triQ2A357IQ2A357_FRATH Putative uncharacterized | K.DLTILYKHDKEESPPEAIAGNK.K            | DLTILYKHDKEESPPEAI            | 191  | 112 | 3.634 | 0.000 |
| triQ2A357IQ2A357_FRATH Putative uncharacterized | K.HDKEESPPEAIAGNKK.E                  | HDKEESPPEAI                   | 191  | 112 | 4.152 | 0.000 |

**Table S2.** Junction peptides identified by MudPIT-LC-MS-MS analysis of *F. tularensis* tmRNA- tagged proteins.

|                                                                     |                                      |                          |     |     |       |       |
|---------------------------------------------------------------------|--------------------------------------|--------------------------|-----|-----|-------|-------|
| triQ2A357IQ2A357_FRATH Putative uncharacterized                     | K.HDKEESPPEAIAGNK.K                  | HDKEESPPEAI              | 191 | 112 | 3.312 | 0.000 |
| triQ2A357IQ2A357_FRATH Putative uncharacterized                     | K.SVKDLTILYKHDKEESPPEAIAGNKK.E       | SVKDLTILYKHDKEESPPEAI    | 191 | 112 | 3.456 | 0.000 |
| triQ2A357IQ2A357_FRATH Putative uncharacterized                     | *.DLTILYKHDKEESPPEAINAGNKK.E         | DLTILYKHDKEESPPEAIN      | 191 | 113 | 3.702 | 0.000 |
| triQ2A357IQ2A357_FRATH Putative uncharacterized                     | K.HDKEESPPEAINAGNKK.E                | HDKEESPPEAIN             | 191 | 113 | 4.131 | 0.000 |
| triQ2A357IQ2A357_FRATH Putative uncharacterized                     | K.HDKEESPPEAINAGNK.K                 | HDKEESPPEAIN             | 191 | 113 | 3.87  | 0.000 |
| triQ2A357IQ2A357_FRATH Putative uncharacterized                     | K.SVKDLTILYKHDKEESPPEAINAGNKK.E      | SVKDLTILYKHDKEESPPEAIN   | 191 | 113 | 3.405 | 0.000 |
| triQ2A357IQ2A357_FRATH Putative uncharacterized                     | K.DLTILYKHDKEESPPEAINIAGNKK.E        | DLTILYKHDKEESPPEAINI     | 191 | 114 | 3.791 | 0.000 |
| triQ2A357IQ2A357_FRATH Putative uncharacterized                     | K.HDKEESPPEAINIAGNK.K                | HDKEESPPEAINI            | 191 | 114 | 4.28  | 0.000 |
| triQ2A357IQ2A357_FRATH Putative uncharacterized                     | K.HDKEESPPEAINIAGNKK.E               | HDKEESPPEAINI            | 191 | 114 | 4.036 | 0.000 |
| triQ2A357IQ2A357_FRATH Putative uncharacterized                     | K.DLTILYKHDKEESPPEAINIC+57LAGNKKE.N  | DLTILYKHDKEESPPEAINICL   | 191 | 116 | 3.243 | 0.000 |
| triQ2A357IQ2A357_FRATH Putative uncharacterized                     | K.DLTILYKHDKEESPPEAINIC+57LSLAGNKK.E | DLTILYKHDKEESPPEAINICLSL | 191 | 118 | 3.177 | 0.000 |
| triQ2A357IQ2A357_FRATH Putative uncharacterized                     | K.HDKEESPPEAINIC+57LSLAGNKK.E        | HDKEESPPEAINICLSL        | 191 | 118 | 3.252 | 0.000 |
| triQ2A357IQ2A357_FRATH Putative uncharacterized                     | K.NNKYETYAGNKK.E                     | NNKYETY                  | 191 | 127 | 3.813 | 0.000 |
| triQ2A357IQ2A357_FRATH Putative uncharacterized                     | K.NNKYETYYSQVAGNKK.E                 | NNKYETYYSQV              | 191 | 131 | 4.02  | 0.000 |
| triQ2A357IQ2A357_FRATH Putative uncharacterized                     | E.TYYSQVAGNKK.E.N                    | TYYSQV                   | 191 | 131 | 3.768 | 0.000 |
| triQ2A357IQ2A357_FRATH Putative uncharacterized                     | E.TYYSQVAGNKK.E                      | TYYSQV                   | 191 | 131 | 2.276 | 0.001 |
| triQ2A357IQ2A357_FRATH Putative uncharacterized                     | K.NNKYETYYSQVIAGNKK.E                | NNKYETYYSQVI             | 191 | 132 | 3.927 | 0.000 |
| triQ2A357IQ2A357_FRATH Putative uncharacterized                     | K.NNKYETYYSQVIAGNK.K                 | NNKYETYYSQVI             | 191 | 132 | 3.857 | 0.000 |
| triQ2A357IQ2A357_FRATH Putative uncharacterized                     | E.TYYSQVIAGNKK.E.N                   | TYYSQVI                  | 191 | 132 | 3.818 | 0.001 |
| triQ2A357IQ2A357_FRATH Putative uncharacterized                     | K.NNKYETYYSQVIYNAGNKK.E              | NNKYETYYSQVIYN           | 191 | 134 | 3.187 | 0.001 |
| triQ2A357IQ2A357_FRATH Putative uncharacterized                     | E.TYYSQVIYNWFAGNKK.E.N               | TYYSQVIYNWF              | 191 | 136 | 4.179 | 0.000 |
| triQ2A357IQ2A357_FRATH Putative uncharacterized                     | K.NNKYETYYSQVIYNWFVSAGNK.K           | NNKYETYYSQVIYNWFVS       | 191 | 138 | 2.17  | 0.002 |
| triQ2A357IQ2A357_FRATH Putative uncharacterized                     | E.TYYSQVIYNWFVSAGNKK.E.N             | TYYSQVIYNWFVS            | 191 | 138 | 3.151 | 0.000 |
| triQ2A357IQ2A357_FRATH Putative uncharacterized                     | E.TYYSQVIYNWFVSSAGNKK.E.N            | TYYSQVIYNWFVSS           | 191 | 139 | 2.923 | 0.000 |
| triQ2A357IQ2A357_FRATH Putative uncharacterized                     | E.GSIFINKDINNSNNDYKGNFAGNKK.E.N      | GSIFINKDINNSNNDYKGNF     | 191 | 167 | 2.301 | 0.000 |
| triQ2A357IQ2A357_FRATH Putative uncharacterized                     | R.IADGWAPAGNKK.E                     | IADGWAP                  | 191 | 181 | 3.163 | 0.000 |
| triQ2A357IQ2A357_FRATH Putative uncharacterized                     | R.IADGWAPPAGNK.K                     | IADGWAPP                 | 191 | 182 | 4.232 | 0.001 |
| triQ2A357IQ2A357_FRATH Putative uncharacterized                     | R.IADGWAPPAGNKK.E                    | IADGWAPP                 | 191 | 182 | 3.898 | 0.001 |
| triQ2A357IQ2A357_FRATH Putative uncharacterized                     | R.IADGWAPPHAGNK.K                    | IADGWAPPH                | 191 | 183 | 4.356 | 0.000 |
| triQ2A357IQ2A357_FRATH Putative uncharacterized                     | R.IADGWAPPHAGNKK.E                   | IADGWAPPH                | 191 | 183 | 4.243 | 0.000 |
| triQ2A357IQ2A357_FRATH Putative uncharacterized                     | R.IADGWAPPHYAGNK.K                   | IADGWAPPHY               | 191 | 184 | 4.091 | 0.000 |
| triQ2A357IQ2A357_FRATH Putative uncharacterized                     | R.IADGWAPPHYEKAGNK.K                 | IADGWAPPHYEK             | 191 | 186 | 3.894 | 0.003 |
| triQ2A358IQ2A358_FRATH Intracellular growth locus, E.IYDFLLTLAGNK.K |                                      | IYDFLLTL                 | 398 | 156 | 2.724 | 0.000 |

**Table S2.** Junction peptides identified by MudPIT-LC-MS-MS analysis of *F. tularensis* tmRNA- tagged proteins.

|                                                                                        |                         |     |     |       |       |
|----------------------------------------------------------------------------------------|-------------------------|-----|-----|-------|-------|
| triQ2A358IQ2A358_FRATH Intracellular growth locus, R.LVPEIYDFPLLTLNAGNK.K              | LVPEIYDFPLLTL           | 398 | 156 | 4.499 | 0.000 |
| triQ2A358IQ2A358_FRATH Intracellular growth locus, R.LVPEIYDFPLLTLNAGNK.K              | LVPEIYDFPLLTLN          | 398 | 157 | 4.434 | 0.000 |
| triQ2A359IQ2A359_FRATH Intracellular growth locus, R.TDPTAC+57IGSHPAGNK.K              | TDPTACIGSHP             | 209 | 30  | 2.444 | 0.004 |
| triQ2A359IQ2A359_FRATH Intracellular growth locus, R.LSITPGSAGNKK.E                    | LSITPGS                 | 209 | 80  | 2.411 | 0.002 |
| triQ2A359IQ2A359_FRATH Intracellular growth locus, R.LSITPGSINPTAGNK.K                 | LSITPGSINPT             | 209 | 84  | 3.926 | 0.000 |
| triQ2A359IQ2A359_FRATH Intracellular growth locus, E.KVSSILQAGNKK.E                    | KVSSILQ                 | 209 | 110 | 4.015 | 0.001 |
| triQ2A359IQ2A359_FRATH Intracellular growth locus, K.VSSILQAGNKK.E                     | VSSILQ                  | 209 | 110 | 3.234 | 0.002 |
| triQ2A359IQ2A359_FRATH Intracellular growth locus, E.KVSSILQASAGNKK.E                  | KVSSILQAS               | 209 | 112 | 3.09  | 0.002 |
| triQ2A359IQ2A359_FRATH Intracellular growth locus, K.VSSILQASAGNKK.E                   | VSSILQAS                | 209 | 112 | 3.676 | 0.000 |
| triQ2A359IQ2A359_FRATH Intracellular growth locus, K.VSSILQASAAGNKK.E                  | VSSILQASA               | 209 | 113 | 4.328 | 0.000 |
| triQ2A359IQ2A359_FRATH Intracellular growth locus, K.VSSILQASATDAGNKK.E                | VSSILQASATD             | 209 | 115 | 3.956 | 0.000 |
| triQ2A359IQ2A359_FRATH Intracellular growth locus, K.AFSISIEPAGNKK.E                   | AFSISIEP                | 209 | 160 | 3.928 | 0.000 |
| triQ2A359IQ2A359_FRATH Intracellular growth locus, K.AFSISIEPTELAGNKK.E                | AFSISIEPTEL             | 209 | 163 | 4.31  | 0.000 |
| triQ2A359IQ2A359_FRATH Intracellular growth locus, K.AFSISIEPTELMAGNK.K                | AFSISIEPTELM            | 209 | 164 | 3.509 | 0.000 |
| triQ2A359IQ2A359_FRATH Intracellular growth locus, K.AFSISIEPTELMGVAGNKK.E             | AFSISIEPTELMGV          | 209 | 166 | 4.545 | 0.000 |
| triQ2A359IQ2A359_FRATH Intracellular growth locus, E.LMGVAGNKK.E                       | LMGV                    | 209 | 166 | 3.234 | 0.008 |
| triQ2A359IQ2A359_FRATH Intracellular growth locus, K.DGMSYHIAGNKK.E                    | DGMSYHI                 | 209 | 175 | 4.1   | 0.006 |
| triQ2A359IQ2A359_FRATH Intracellular growth locus, K.DGMSYHIISAGNKK.E                  | DGMSYHIIS               | 209 | 177 | 3.945 | 0.000 |
| triQ2A359IQ2A359_FRATH Intracellular growth locus, K.DGM+16SYHIISAGNKK.E               | DGMSYHIIS               | 209 | 177 | 3.544 | 0.005 |
| triQ2A359IQ2A359_FRATH Intracellular growth locus, K.DGMSYHIISAGNK.K                   | DGMSYHIIS               | 209 | 177 | 2.959 | 0.001 |
| triQ2A359IQ2A359_FRATH Intracellular growth locus, K.DGMSYHIISIDGLTTSQGSLAGNKK.E       | DGMSYHIISIDGLTTSQGSL    | 209 | 188 | 3.39  | 0.000 |
| triQ2A359IQ2A359_FRATH Intracellular growth locus, K.DGMSYHIISIDGLTTSQGSLPAGNKK.E      | DGMSYHIISIDGLTTSQGSLP   | 209 | 189 | 3.494 | 0.000 |
| triQ2A359IQ2A359_FRATH Intracellular growth locus, K.DGMSYHIISIDGLTTSQGSLPVAGNK.K      | DGMSYHIISIDGLTTSQGSLPV  | 209 | 190 | 4.329 | 0.000 |
| triQ2A359IQ2A359_FRATH Intracellular growth locus, K.DGMSYHIISIDGLTTSQGSLPVC+57AGNKK.E | DGMSYHIISIDGLTTSQGSLPVC | 209 | 191 | 3.487 | 0.000 |
| triQ2A359IQ2A359_FRATH Intracellular growth locus, K.IGYIAAAAGNK.K                     | IGYIAAA                 | 209 | 209 | 4.211 | 0.002 |
| triQ2A359IQ2A359_FRATH Intracellular growth locus, K.IGYIAAAAGNKK.E                    | IGYIAAA                 | 209 | 209 | 3.82  | 0.002 |
| triQ2A359IQ2A359_FRATH Intracellular growth locus, K.IGYIAAAAGNKK.E                    | IGYIAAA                 | 209 | 209 | 3.721 | 0.002 |
| triQ2A368IQ2A368_FRATH Pyruvate kinase FTL_114 K.VIIAGQVAGNKK.E                        | VIIAGQV                 | 478 | 477 | 3.976 | 0.000 |
| triQ2A370IQ2A370_FRATH Glycerdehyde-3-phosph: K.ALHDLANIESGFAGNK.K                     | ALHDLANIESGF            | 333 | 173 | 3.074 | 0.000 |
| triQ2A370IQ2A370_FRATH Glycerdehyde-3-phosph: K.AIGLVIPAGNKK.E                         | AIGLVIP                 | 333 | 222 | 2.578 | 0.004 |
| triQ2A370IQ2A370_FRATH Glycerdehyde-3-phosph: R.VPVATGSLTELAVAGNK.K                    | VPVATGSLTELAV           | 333 | 248 | 2.902 | 0.000 |
| triQ2A370IQ2A370_FRATH Glycerdehyde-3-phosph: R.VVEYFGALAGNK.E                         | VVEYFGAL                | 333 | 333 | 4.298 | 0.000 |
| triQ2A372IQ2A372_FRATH Putative uncharacterized D.LKDIIEILLDLPLPKKDTSTAGNK.K           | LKDIIEILLDLPLPKKDTST    | 167 | 136 | 2.133 | 0.000 |

**Table S2.** Junction peptides identified by MudPIT-LC-MS-MS analysis of *F. tularensis* tmRNA- tagged proteins.

|                                                                                   |                        |     |     |       |       |
|-----------------------------------------------------------------------------------|------------------------|-----|-----|-------|-------|
| triQ2A377IQ2A377_FRATH 3-oxoacyl-(Acyl-carrier-pr K.YITGQTLHVAGNK.K               | YITGQTLHV              | 247 | 240 | 3.245 | 0.000 |
| triQ2A378IQ2A378_FRATH Acyl carrier protein FTL_` R.VNHIIVEQLGVKEEDLKPEASAGNK.K   | VNHIIVEQLGVKEEDLKPEAS  | 94  | 43  | 3.384 | 0.000 |
| triQ2A378IQ2A378_FRATH Acyl carrier protein FTL_` R.VNHIIVEQLGVKEEDLKPEASFAGNKK.E | VNHIIVEQLGVKEEDLKPEASF | 94  | 44  | 3.452 | 0.000 |
| triQ2A378IQ2A378_FRATH Acyl carrier protein FTL_` K.DVYDYIAGNKK.E                 | DVYDYI                 | 94  | 88  | 3.904 | 0.000 |
| triQ2A378IQ2A378_FRATH Acyl carrier protein FTL_` R.TVKDVYDYIAGNKK.E              | TVKDVYDYI              | 94  | 88  | 4.164 | 0.000 |
| triQ2A378IQ2A378_FRATH Acyl carrier protein FTL_` K.DVYDYIESKAGNK.K               | DVYDYIESK              | 94  | 91  | 4.156 | 0.000 |
| triQ2A378IQ2A378_FRATH Acyl carrier protein FTL_` R.TVKDVYDYIESKAGNK.K            | TVKDVYDYIESK           | 94  | 91  | 3.345 | 0.000 |
| triQ2A378IQ2A378_FRATH Acyl carrier protein FTL_` E.SKDVGAGNKE.N                  | SKDVG                  | 94  | 94  | 2.824 | 0.003 |
| triQ2A383IQ2A383_FRATH Inositol-1-monophosphat: K.EAGAVVTNIHGTSDLSDSLIVAGNKK.E    | EAGAVVTNIHGTSDLSDSLIV  | 262 | 243 | 3.148 | 0.000 |
| triQ2A3A5IQ2A3A5_FRATH Putative uncharacterized R.NIDKDKDDEAGNKK.E                | NIDKDKDDE              | 152 | 134 | 3.208 | 0.001 |
| triQ2A3A5IQ2A3A5_FRATH Putative uncharacterized R.NIDKDKDENAGNKK.E                | NIDKDKDEN              | 152 | 135 | 3.98  | 0.000 |
| triQ2A3A5IQ2A3A5_FRATH Putative uncharacterized R.NIDKDKDENPNAGNKK.E              | NIDKDKDENPN            | 152 | 137 | 3.446 | 0.000 |
| triQ2A3A5IQ2A3A5_FRATH Putative uncharacterized R.NIDKDKDENPNAGNK.K               | NIDKDKDENPN            | 152 | 137 | 3.375 | 0.000 |
| triQ2A3A5IQ2A3A5_FRATH Putative uncharacterized R.NIDKDKDENPNLAGNKK.E             | NIDKDKDENPNL           | 152 | 138 | 3.802 | 0.001 |
| triQ2A3A5IQ2A3A5_FRATH Putative uncharacterized R.NIDKDKDENPNLAAGNKK.E            | NIDKDKDENPNLA          | 152 | 139 | 3.346 | 0.000 |
| triQ2A3A5IQ2A3A5_FRATH Putative uncharacterized R.NIDKDKDENPNLANAGNKK.E           | NIDKDKDENPNLAN         | 152 | 140 | 3.393 | 0.000 |
| triQ2A3A5IQ2A3A5_FRATH Putative uncharacterized R.NIDKDKDENPNLANLAGNKK.E          | NIDKDKDENPNLANL        | 152 | 141 | 3.456 | 0.000 |
| triQ2A3A5IQ2A3A5_FRATH Putative uncharacterized R.NIDKDKDENPNLANLAAGNKK.E         | NIDKDKDENPNLANLA       | 152 | 142 | 3.287 | 0.000 |
| triQ2A3A5IQ2A3A5_FRATH Putative uncharacterized R.NIDKDKDENPNLANLAAGNK.K          | NIDKDKDENPNLANLA       | 152 | 142 | 3.175 | 0.000 |
| triQ2A3A5IQ2A3A5_FRATH Putative uncharacterized R.NIDKDKDENPNLANLATPAPAGNK.K      | NIDKDKDENPNLANLATPAP   | 152 | 146 | 3.429 | 0.000 |
| triQ2A3A5IQ2A3A5_FRATH Putative uncharacterized R.NIDKDKDENPNLANLATPAPAGNKK.E     | NIDKDKDENPNLANLATPAP   | 152 | 146 | 3.107 | 0.000 |
| triQ2A3A5IQ2A3A5_FRATH Putative uncharacterized R.NIDKDKDENPNLANLATPAPTAGNK.K     | NIDKDKDENPNLANLATPAPT  | 152 | 147 | 3.757 | 0.000 |
| triQ2A3B3IQ2A3B3_FRATH Macrophage infectivity pc K.SKLPDQMAGNKK.E                 | SKLPDQM                | 96  | 79  | 3.875 | 0.006 |
| triQ2A3B3IQ2A3B3_FRATH Macrophage infectivity pc K.LTPDQMAGNKK.E                  | LTPDQM                 | 96  | 80  | 3.93  | 0.000 |
| triQ2A3B3IQ2A3B3_FRATH Macrophage infectivity pc K.SKLPDQMAGNKK.E                 | SKLPDQM                | 96  | 80  | 4.105 | 0.000 |
| triQ2A3B3IQ2A3B3_FRATH Macrophage infectivity pc K.SKLPDQM+16QAGNKK.E             | SKLPDQM                | 96  | 80  | 2.035 | 0.000 |
| triQ2A3B3IQ2A3B3_FRATH Macrophage infectivity pc K.LTPDQMAGNKK.E                  | LTPDQM                 | 96  | 81  | 3.931 | 0.001 |
| triQ2A3B3IQ2A3B3_FRATH Macrophage infectivity pc K.SKLPDQMAGNKK.E                 | SKLPDQM                | 96  | 81  | 4.181 | 0.000 |
| triQ2A3B3IQ2A3B3_FRATH Macrophage infectivity pc K.LTPDQMAGNKK.E                  | LTPDQM                 | 96  | 82  | 4.21  | 0.000 |
| triQ2A3B3IQ2A3B3_FRATH Macrophage infectivity pc K.LTPDQM+16QNAAGNK.K             | LTPDQM                 | 96  | 82  | 3.212 | 0.002 |
| triQ2A3B3IQ2A3B3_FRATH Macrophage infectivity pc K.SKLPDQMAGNKK.E                 | SKLPDQM                | 96  | 82  | 4.238 | 0.000 |
| triQ2A3B3IQ2A3B3_FRATH Macrophage infectivity pc K.SKLPDQM+16QNAAGNKK.E           | SKLPDQM                | 96  | 82  | 2.87  | 0.000 |
| triQ2A3B3IQ2A3B3_FRATH Macrophage infectivity pc K.SKLPDQMAGNKK.E                 | SKLPDQM                | 96  | 83  | 4.077 | 0.000 |

**Table S2.** Junction peptides identified by MudPIT-LC-MS-MS analysis of *F. tularensis* tmRNA- tagged proteins.

|                                                                                |                    |     |     |       |       |
|--------------------------------------------------------------------------------|--------------------|-----|-----|-------|-------|
| triQ2A3B3IQ2A3B3_FRATH Macrophage infectivity pc K.SKLTPDQMQRNAM+16AGNKK.E     | SKLTPDQMQRNAM      | 96  | 83  | 3.204 | 0.000 |
| triQ2A3B3IQ2A3B3_FRATH Macrophage infectivity pc K.SKLTPDQMQRNAMIAGNKK.E       | SKLTPDQMQRNAMI     | 96  | 84  | 4.246 | 0.002 |
| triQ2A3B3IQ2A3B3_FRATH Macrophage infectivity pc K.SKLTPDQMQRNAMIEFQAGNKK.K    | SKLTPDQMQRNAMIEFQ  | 96  | 87  | 3.391 | 0.000 |
| triQ2A3B5IQ2A3B5_FRATH Peptide methionine sulfox D.QPYPDYKVKVAGNKK.K           | QPYPDYKVKV         | 284 | 169 | 2.391 | 0.003 |
| triQ2A3B8IQ2A3B8_FRATH Putative uncharacterized K.THQNHEHKHQDDAGNKK.E.N        | THQNHEHKHQDD       | 117 | 17  | 2.489 | 0.000 |
| triQ2A3B8IQ2A3B8_FRATH Putative uncharacterized K.HQDDCGH+57GHAGNKK.E          | HQDDCGH            | 117 | 20  | 2.196 | 0.003 |
| triQ2A3B8IQ2A3B8_FRATH Putative uncharacterized K.HGDHYDYLHDGHAGNKK.E          | HGDHYDYLHDGH       | 117 | 36  | 4.047 | 0.000 |
| triQ2A3B8IQ2A3B8_FRATH Putative uncharacterized K.HGDHYDYLHDGHLHHAGNKK.K       | HGDHYDYLHDGHLHH    | 117 | 39  | 3.129 | 0.000 |
| triQ2A3B8IQ2A3B8_FRATH Putative uncharacterized E.VTEKNPDGC+57AGNKK.E.N        | VTEKNPDGC          | 117 | 60  | 3.311 | 0.003 |
| triQ2A3B8IQ2A3B8_FRATH Putative uncharacterized K.NPDGC+57HPIAGNKK.K           | NPDGCPI            | 117 | 63  | 3.071 | 0.008 |
| triQ2A3B8IQ2A3B8_FRATH Putative uncharacterized E.VTEKNPDGC+57HPIKEDAGNKK.E    | VTEKNPDGCPIKED     | 117 | 66  | 2.651 | 0.008 |
| triQ2A3B8IQ2A3B8_FRATH Putative uncharacterized E.DC+57SSHVHGPNACAGNKK.K       | DCSSHVHGPNAC       | 117 | 76  | 2.659 | 0.001 |
| triQ2A3B8IQ2A3B8_FRATH Putative uncharacterized R.LHHPHGDAGNKK.E               | LHHPHGD            | 117 | 101 | 3.366 | 0.000 |
| triQ2A3B8IQ2A3B8_FRATH Putative uncharacterized R.LHHPHGDAGNKK.K               | LHHPHGD            | 117 | 101 | 2.419 | 0.002 |
| triQ2A3B8IQ2A3B8_FRATH Putative uncharacterized R.LHHPHGDHCDDHGPVEAGNKK.K      | LHHPHGDHCDDHGPVE   | 117 | 110 | 2.945 | 0.000 |
| triQ2A3B8IQ2A3B8_FRATH Putative uncharacterized R.LHHPHGDHC+57DDHGPVEAGNKK.K   | LHHPHGDHCDDHGPVE   | 117 | 110 | 2.87  | 0.000 |
| triQ2A3B8IQ2A3B8_FRATH Putative uncharacterized R.LHHPHGDHC+57DDHGPVEVAGNKK.K  | LHHPHGDHCDDHGPVEV  | 117 | 111 | 2.871 | 0.000 |
| triQ2A3B8IQ2A3B8_FRATH Putative uncharacterized R.LHHPHGDHC+57DDHGPVEVIAGNKK.K | LHHPHGDHCDDHGPVEVI | 117 | 112 | 3.121 | 0.000 |
| triQ2A3D0IQ2A3D0_FRATH Putative uncharacterized R.SSGTKPADLIANDIMLPAGNKK.K     | SSGTKPADLIANDIMLP  | 196 | 118 | 2.459 | 0.006 |
| triQ2A3D0IQ2A3D0_FRATH Putative uncharacterized *.KLSLDVYHVAGNKK.K             | KLSLDVYHV          | 196 | 183 | 4.103 | 0.000 |
| triQ2A3D0IQ2A3D0_FRATH Putative uncharacterized K.LSLDVYHVAGNKK.K              | LSLDVYHV           | 196 | 183 | 4.209 | 0.000 |
| triQ2A3D0IQ2A3D0_FRATH Putative uncharacterized K.LSLDVYHVAGNKK.E              | LSLDVYHV           | 196 | 183 | 4.15  | 0.000 |
| triQ2A3D0IQ2A3D0_FRATH Putative uncharacterized D.VYHVAGNKK.E.N                | VYHV               | 196 | 183 | 2.659 | 0.005 |
| triQ2A3D0IQ2A3D0_FRATH Putative uncharacterized D.VYHVYQAGNKK.K                | VYHVYQ             | 196 | 185 | 3.845 | 0.002 |
| triQ2A3D0IQ2A3D0_FRATH Putative uncharacterized D.VYHVYQAGNKK.E.N              | VYHVYQ             | 196 | 185 | 3.346 | 0.001 |
| triQ2A3E4IQ2A3E4_FRATH Inorganic pyrophosphatas E.IEKSVKNAGNKK.E.N             | IEKSVKN            | 173 | 171 | 3.646 | 0.000 |
| triQ2A3E5IQ2A3E5_FRATH D-alanyl-D-alanine carboxyl D.PYFNGANAGNKK.E            | PYFNGAN            | 444 | 36  | 3.964 | 0.008 |
| triQ2A3E5IQ2A3E5_FRATH D-alanyl-D-alanine carboxyl E.LDAPAWVTM+16AGNKK.K       | LDAPAWVTM          | 444 | 60  | 3.371 | 0.000 |
| triQ2A3E5IQ2A3E5_FRATH D-alanyl-D-alanine carboxyl R.PANIELDAPAWVTM+16AGNKK.K  | PANIELDAPAWVTM     | 444 | 60  | 2.738 | 0.001 |
| triQ2A3E5IQ2A3E5_FRATH D-alanyl-D-alanine carboxyl R.NLVTGMDVVSGAGNKK.E        | NLVTGMDVVSG        | 444 | 142 | 2.64  | 0.001 |
| triQ2A3E5IQ2A3E5_FRATH D-alanyl-D-alanine carboxyl E.YIGGTTQAFAGNKK.E.N        | YIGGTTQAF          | 444 | 160 | 3.799 | 0.005 |
| triQ2A3E5IQ2A3E5_FRATH D-alanyl-D-alanine carboxyl E.YIGGTTQAFTAGNKK.E.N       | YIGGTTQAFT         | 444 | 161 | 4.299 | 0.000 |
| triQ2A3E5IQ2A3E5_FRATH D-alanyl-D-alanine carboxyl E.YIGGTTQAFTDLAGNKK.E.N     | YIGGTTQAFTDL       | 444 | 163 | 4.368 | 0.000 |



**Table S2.** Junction peptides identified by MudPIT-LC-MS-MS analysis of *F. tularensis* tmRNA- tagged proteins.

|                                                                                          |                              |     |     |       |       |
|------------------------------------------------------------------------------------------|------------------------------|-----|-----|-------|-------|
| triQ2A3E5IQ2A3E5_FRATH D-alanyl-D-alanine carboxyl K.AIGMNNTHAGNKK.E                     | AIGMNNTH                     | 444 | 177 | 4.061 | 0.000 |
| triQ2A3E5IQ2A3E5_FRATH D-alanyl-D-alanine carboxyl K.AIGMNNTHAGNK.K                      | AIGMNNTH                     | 444 | 177 | 3.748 | 0.000 |
| triQ2A3E5IQ2A3E5_FRATH D-alanyl-D-alanine carboxyl K.AIGMNNTHFAGNKK.E                    | AIGMNNTHF                    | 444 | 178 | 4.064 | 0.000 |
| triQ2A3E5IQ2A3E5_FRATH D-alanyl-D-alanine carboxyl K.AIGM+16NNTHFAGNKK.E                 | AIGMNNTHF                    | 444 | 178 | 3.034 | 0.003 |
| triQ2A3E5IQ2A3E5_FRATH D-alanyl-D-alanine carboxyl K.AIGMNNTHFAAGNKK.E                   | AIGMNNTHFA                   | 444 | 179 | 3.98  | 0.000 |
| triQ2A3E5IQ2A3E5_FRATH D-alanyl-D-alanine carboxyl K.AIGMNNTHFANPAGNKK.E                 | AIGMNNTHFANP                 | 444 | 181 | 2.676 | 0.000 |
| triQ2A3E5IQ2A3E5_FRATH D-alanyl-D-alanine carboxyl K.AIGMNNTHFANPDAGNKK.E                | AIGMNNTHFANPD                | 444 | 182 | 3.456 | 0.000 |
| triQ2A3E5IQ2A3E5_FRATH D-alanyl-D-alanine carboxyl K.AIGMNNTHFANPDGAGNKK.E               | AIGMNNTHFANPDG               | 444 | 183 | 3.387 | 0.000 |
| triQ2A3E5IQ2A3E5_FRATH D-alanyl-D-alanine carboxyl K.AIGMNNTHFANPDGLAGNKK.E              | AIGMNNTHFANPDGL              | 444 | 184 | 4.117 | 0.000 |
| triQ2A3E5IQ2A3E5_FRATH D-alanyl-D-alanine carboxyl K.AIGMNNTHFANPDGLPGAGNKK.K            | AIGMNNTHFANPDGLPG            | 444 | 186 | 2.366 | 0.000 |
| triQ2A3E5IQ2A3E5_FRATH D-alanyl-D-alanine carboxyl K.AIGMNNTHFANPDGLPGGAGNKK.K           | AIGMNNTHFANPDGLPGG           | 444 | 187 | 2.133 | 0.004 |
| triQ2A3E5IQ2A3E5_FRATH D-alanyl-D-alanine carboxyl K.AIGMNNTHFANPDGLPGGEQAGNKK.E         | AIGMNNTHFANPDGLPGGEQ         | 444 | 189 | 3.503 | 0.006 |
| triQ2A3E5IQ2A3E5_FRATH D-alanyl-D-alanine carboxyl K.AIGMNNTHFANPDGLPGGEQYAGNKK.E        | AIGMNNTHFANPDGLPGGEQY        | 444 | 190 | 3.871 | 0.000 |
| triQ2A3E5IQ2A3E5_FRATH D-alanyl-D-alanine carboxyl K.AIGMNNTHFANPDGLPGGEQYTTAGNKK.E      | AIGMNNTHFANPDGLPGGEQYTT      | 444 | 192 | 3.498 | 0.000 |
| triQ2A3E5IQ2A3E5_FRATH D-alanyl-D-alanine carboxyl K.AIGMNNTHFANPDGLPGGEQYTTAAGNKK.E     | AIGMNNTHFANPDGLPGGEQYTTA     | 444 | 193 | 3.924 | 0.000 |
| triQ2A3E5IQ2A3E5_FRATH D-alanyl-D-alanine carboxyl K.AIGMNNTHFANPDGLPGGEQYTTAHAGNKK.K    | AIGMNNTHFANPDGLPGGEQYTTAH    | 444 | 194 | 3.982 | 0.000 |
| triQ2A3E5IQ2A3E5_FRATH D-alanyl-D-alanine carboxyl K.AIGMNNTHFANPDGLPGGEQYTTAHDMAAGNKK.  | AIGMNNTHFANPDGLPGGEQYTTAHDMA | 444 | 197 | 3.104 | 0.000 |
| triQ2A3E5IQ2A3E5_FRATH D-alanyl-D-alanine carboxyl K.AIGMNNTHFANPDGLPGGEQYTTAHDMALLAGNK. | AIGMNNTHFANPDGLPGGEQYTTAHDMA | 444 | 199 | 3.824 | 0.000 |
| triQ2A3E5IQ2A3E5_FRATH D-alanyl-D-alanine carboxyl R.SYIYNFPAGNKK.E                      | SYIYNFP                      | 444 | 208 | 4.2   | 0.001 |
| triQ2A3E5IQ2A3E5_FRATH D-alanyl-D-alanine carboxyl R.SYIYNFPEAGNKK.E                     | SYIYNFPE                     | 444 | 209 | 4.184 | 0.000 |
| triQ2A3E5IQ2A3E5_FRATH D-alanyl-D-alanine carboxyl R.SYIYNFPEAAGNKK.E                    | SYIYNFPEA                    | 444 | 210 | 4.154 | 0.000 |
| triQ2A3E5IQ2A3E5_FRATH D-alanyl-D-alanine carboxyl E.AYKVYDDKGLVAGNKK.E.N                | AYKVYDDKGLV                  | 444 | 220 | 4.285 | 0.000 |
| triQ2A3E5IQ2A3E5_FRATH D-alanyl-D-alanine carboxyl E.AYKVYDDKGLVWAGNKK.E.N               | AYKVYDDKGLVW                 | 444 | 221 | 3.345 | 0.000 |
| triQ2A3E5IQ2A3E5_FRATH D-alanyl-D-alanine carboxyl E.AYKVYDDKGLVWNATKQDSVSIAAGNKK.E.N    | AYKVYDDKGLVWNATKQDSVSIA      | 444 | 232 | 3.592 | 0.000 |
| triQ2A3E5IQ2A3E5_FRATH D-alanyl-D-alanine carboxyl D.SVSIADRAGNKK.E.N                    | SVSIADR                      | 444 | 234 | 2.753 | 0.000 |
| triQ2A3E5IQ2A3E5_FRATH D-alanyl-D-alanine carboxyl R.ATGNVIESAGNKK.E                     | ATGNVIES                     | 444 | 251 | 4.072 | 0.000 |
| triQ2A3E5IQ2A3E5_FRATH D-alanyl-D-alanine carboxyl R.ATGNVIESYTVKAGNKK.K                 | ATGNVIESYTVK                 | 444 | 255 | 3.95  | 0.000 |
| triQ2A3E5IQ2A3E5_FRATH D-alanyl-D-alanine carboxyl E.SYTVKDLDDAGNKK.E.N                  | SYTVKDLDD                    | 444 | 258 | 4.169 | 0.000 |
| triQ2A3E5IQ2A3E5_FRATH D-alanyl-D-alanine carboxyl E.SYTVKDLDDQAKDKAGNKK.E.N             | SYTVKDLDDQAKDK               | 444 | 264 | 3.279 | 0.000 |
| triQ2A3E5IQ2A3E5_FRATH D-alanyl-D-alanine carboxyl E.SYTVKDLDDQAKDKC+57AGNKK.E.N         | SYTVKDLDDQAKDKC              | 444 | 265 | 2.601 | 0.000 |
| triQ2A3E5IQ2A3E5_FRATH D-alanyl-D-alanine carboxyl E.SYTVKDLDDQAKDKC+57NAGNKKENR.V       | SYTVKDLDDQAKDKCN             | 444 | 266 | 2.659 | 0.003 |
| triQ2A3E5IQ2A3E5_FRATH D-alanyl-D-alanine carboxyl E.SYTVKDLDDQAKDKC+57NKLAGNKK.E.N      | SYTVKDLDDQAKDKCNKL           | 444 | 268 | 2.745 | 0.010 |
| triQ2A3E5IQ2A3E5_FRATH D-alanyl-D-alanine carboxyl E.SYTVKDLDDQAKDKC+57NKLFAAGNKK.E.N    | SYTVKDLDDQAKDKCNKLF          | 444 | 269 | 2.997 | 0.000 |

**Table S2.** Junction peptides identified by MudPIT-LC-MS-MS analysis of *F. tularensis* tmRNA- tagged proteins.

|                                                                                      |                       |     |     |       |       |
|--------------------------------------------------------------------------------------|-----------------------|-----|-----|-------|-------|
| triQ2A3E5IQ2A3E5_FRATH D-alanyl-D-alanine carboxyl E.SYTVKDLDDQAKDKC+57NKLFPAGNKKE.N | SYTVKDLDDQAKDKCNKLF   | 444 | 270 | 3.118 | 0.000 |
| triQ2A3E5IQ2A3E5_FRATH D-alanyl-D-alanine carboxyl K.GDNFVLQAGNK.K                   | GDNFVLQ               | 444 | 278 | 2.772 | 0.002 |
| triQ2A3E5IQ2A3E5_FRATH D-alanyl-D-alanine carboxyl R.LLFTFDGAGNKK.E                  | LLFTFDG               | 444 | 290 | 4.359 | 0.000 |
| triQ2A3E5IQ2A3E5_FRATH D-alanyl-D-alanine carboxyl R.LLFTFDGAGNKK.K                  | LLFTFDG               | 444 | 290 | 3.246 | 0.002 |
| triQ2A3E5IQ2A3E5_FRATH D-alanyl-D-alanine carboxyl K.TGHTDAAGYC+57LVAGNK.K           | TGHTDAAGYCLV          | 444 | 307 | 3.62  | 0.000 |
| triQ2A3E5IQ2A3E5_FRATH D-alanyl-D-alanine carboxyl K.TGHTDAAGYC+57LVSAAGNKK.E        | TGHTDAAGYCLVS         | 444 | 308 | 3.688 | 0.000 |
| triQ2A3E5IQ2A3E5_FRATH D-alanyl-D-alanine carboxyl K.TGHTDAAGYC+57LVSSAGNK.K         | TGHTDAAGYCLVSS        | 444 | 309 | 2.265 | 0.000 |
| triQ2A3E5IQ2A3E5_FRATH D-alanyl-D-alanine carboxyl R.FISVVLGTAGNKK.E                 | FISVVLGT              | 444 | 324 | 2.687 | 0.001 |
| triQ2A3E5IQ2A3E5_FRATH D-alanyl-D-alanine carboxyl R.FISVVLGTTAGNKK.E                | FISVVLGTT             | 444 | 325 | 3.711 | 0.003 |
| triQ2A3E5IQ2A3E5_FRATH D-alanyl-D-alanine carboxyl R.FISVVLGTTAGNKK.E                | FISVVLGTT             | 444 | 326 | 3.689 | 0.000 |
| triQ2A3E5IQ2A3E5_FRATH D-alanyl-D-alanine carboxyl E.NVLLYKANSAGNKK.E.N              | NVLLYKANS             | 444 | 355 | 4.208 | 0.000 |
| triQ2A3E5IQ2A3E5_FRATH D-alanyl-D-alanine carboxyl K.ANSPVTIAGNKK.E                  | ANSPVTI               | 444 | 359 | 3.744 | 0.000 |
| triQ2A3E5IQ2A3E5_FRATH D-alanyl-D-alanine carboxyl K.ANSPVTISAGNKK.E                 | ANSPVTIS              | 444 | 360 | 2.993 | 0.000 |
| triQ2A3E5IQ2A3E5_FRATH D-alanyl-D-alanine carboxyl K.ANSPVTISAAGNKK.E                | ANSPVTISA             | 444 | 361 | 3.937 | 0.000 |
| triQ2A3E5IQ2A3E5_FRATH D-alanyl-D-alanine carboxyl E.NVLLYKANSPVTISADAGNKK.E.N       | NVLLYKANSPVTISAD      | 444 | 362 | 3.603 | 0.000 |
| triQ2A3E5IQ2A3E5_FRATH D-alanyl-D-alanine carboxyl K.ANSPVTISADNIPAGNKK.E            | ANSPVTISADNIP         | 444 | 365 | 4.377 | 0.000 |
| triQ2A3E5IQ2A3E5_FRATH D-alanyl-D-alanine carboxyl E.NVLLYKANSPVTISADNIPAGNKK.E.N    | NVLLYKANSPVTISADNIP   | 444 | 365 | 3.378 | 0.000 |
| triQ2A3E5IQ2A3E5_FRATH D-alanyl-D-alanine carboxyl E.NVLLYKANSPVTISADNIPNAAGNKK.E.N  | NVLLYKANSPVTISADNIPNA | 444 | 367 | 3.126 | 0.000 |
| triQ2A3E5IQ2A3E5_FRATH D-alanyl-D-alanine carboxyl *.KLTVASNQNIAGNKK.K               | KLTVASNQNI            | 444 | 381 | 3.393 | 0.000 |
| triQ2A3E5IQ2A3E5_FRATH D-alanyl-D-alanine carboxyl K.LTVASNQNIAGNKK.E                | LTVASNQNI             | 444 | 381 | 4.14  | 0.000 |
| triQ2A3E5IQ2A3E5_FRATH D-alanyl-D-alanine carboxyl K.LTVASNQNIAGNKK.K                | LTVASNQNI             | 444 | 381 | 3.975 | 0.001 |
| triQ2A3E5IQ2A3E5_FRATH D-alanyl-D-alanine carboxyl K.LTVASNQNIYKTVAGNKK.E.N          | LTVASNQNIYKTV         | 444 | 386 | 2.493 | 0.000 |
| triQ2A3E5IQ2A3E5_FRATH D-alanyl-D-alanine carboxyl E.FNPNLNAAGNKK.E.N                | FNPNLNA               | 444 | 405 | 3.235 | 0.002 |
| triQ2A3E5IQ2A3E5_FRATH D-alanyl-D-alanine carboxyl E.FNPNLNAPAGNKK.E.N               | FNPNLNAP              | 444 | 406 | 4.022 | 0.000 |
| triQ2A3E5IQ2A3E5_FRATH D-alanyl-D-alanine carboxyl E.FNPNLNAPAGNKK.E                 | FNPNLNAP              | 444 | 406 | 3.139 | 0.000 |
| triQ2A3E5IQ2A3E5_FRATH D-alanyl-D-alanine carboxyl E.FNPNLNAPIAGNKK.E.N              | FNPNLNAPI             | 444 | 407 | 4.269 | 0.001 |
| triQ2A3E5IQ2A3E5_FRATH D-alanyl-D-alanine carboxyl E.FNPNLNAPIAGNKK.K                | FNPNLNAPI             | 444 | 407 | 4.181 | 0.000 |
| triQ2A3E5IQ2A3E5_FRATH D-alanyl-D-alanine carboxyl K.QGIEFNPNLNAPIAGNKK.K            | QGIEFNPNLNAPI         | 444 | 407 | 4.051 | 0.000 |
| triQ2A3E5IQ2A3E5_FRATH D-alanyl-D-alanine carboxyl K.TGQNVGNAGNKK.E                  | TGQNVGN               | 444 | 415 | 3.23  | 0.000 |
| triQ2A3E5IQ2A3E5_FRATH D-alanyl-D-alanine carboxyl K.TGQNVGNLAGNKK.K                 | TGQNVGNL              | 444 | 416 | 3.826 | 0.002 |
| triQ2A3E5IQ2A3E5_FRATH D-alanyl-D-alanine carboxyl K.TGQNVGNLVAGNKK.E                | TGQNVGNLV             | 444 | 417 | 3.782 | 0.000 |
| triQ2A3E5IQ2A3E5_FRATH D-alanyl-D-alanine carboxyl K.TGQNVGNLVIAGNKK.E               | TGQNVGNLVI            | 444 | 418 | 4.132 | 0.000 |
| triQ2A3E5IQ2A3E5_FRATH D-alanyl-D-alanine carboxyl K.TGQNVGNLVIAGNKK.K               | TGQNVGNLVI            | 444 | 418 | 2.302 | 0.002 |

**Table S2.** Junction peptides identified by MudPIT-LC-MS-MS analysis of *F. tularensis* tmRNA- tagged proteins.

|                                                                            |                |     |     |       |       |
|----------------------------------------------------------------------------|----------------|-----|-----|-------|-------|
| triQ2A3E5IQ2A3E5_FRATH D-alanyl-D-alanine carboxyl K.TGQNVGNLVITAGNKK.E    | TGQNVGNLVIT    | 444 | 419 | 4.109 | 0.000 |
| triQ2A3E5IQ2A3E5_FRATH D-alanyl-D-alanine carboxyl K.TGQNVGNLVITLAGNK.K    | TGQNVGNLVITL   | 444 | 420 | 4.31  | 0.000 |
| triQ2A3E5IQ2A3E5_FRATH D-alanyl-D-alanine carboxyl K.TGQNVGNLVITLGGAGNK.K  | TGQNVGNLVITLG  | 444 | 421 | 3.885 | 0.000 |
| triQ2A3E5IQ2A3E5_FRATH D-alanyl-D-alanine carboxyl K.TGQNVGNLVITLGDAGNKK.E | TGQNVGNLVITLGD | 444 | 423 | 2.881 | 0.001 |
| triQ2A3E5IQ2A3E5_FRATH D-alanyl-D-alanine carboxyl E.IASIPVVAGNKK.E.N      | IASIPVV        | 444 | 433 | 3.897 | 0.000 |
| triQ2A3E5IQ2A3E5_FRATH D-alanyl-D-alanine carboxyl E.IASIPVVAAGNKK.E.N     | IASIPVVA       | 444 | 434 | 4.006 | 0.000 |
| triQ2A3E5IQ2A3E5_FRATH D-alanyl-D-alanine carboxyl E.IASIPVVAMAGNK.K       | IASIPVVAM      | 444 | 435 | 4.179 | 0.000 |
| triQ2A3E5IQ2A3E5_FRATH D-alanyl-D-alanine carboxyl E.IASIPVVAMAGNKK.E.N    | IASIPVVAM      | 444 | 435 | 4.031 | 0.000 |
| triQ2A3E5IQ2A3E5_FRATH D-alanyl-D-alanine carboxyl E.IASIPVVAM+16AGNK.K    | IASIPVVAM      | 444 | 435 | 3.415 | 0.000 |
| triQ2A3E5IQ2A3E5_FRATH D-alanyl-D-alanine carboxyl E.IASIPVVAMNAGNKK.E.N   | IASIPVVAMN     | 444 | 436 | 3.747 | 0.001 |
| triQ2A3E5IQ2A3E5_FRATH D-alanyl-D-alanine carboxyl E.IASIPVVAMNAGNK.K      | IASIPVVAMN     | 444 | 436 | 3.633 | 0.000 |
| triQ2A3E5IQ2A3E5_FRATH D-alanyl-D-alanine carboxyl E.IASIPVVAMNNVSAGNK.K   | IASIPVVAMNNVS  | 444 | 439 | 2.988 | 0.000 |
| triQ2A3E5IQ2A3E5_FRATH D-alanyl-D-alanine carboxyl E.IASIPVVAMNNVSQAGNK.K  | IASIPVVAMNNVSQ | 444 | 440 | 3.729 | 0.006 |
| triQ2A3E6IQ2A3E6_FRATH Putative uncharacterized K.EISAHPEVHMVAGNK.K        | EISAHPEVHMV    | 94  | 93  | 4.156 | 0.000 |
| triQ2A3E6IQ2A3E6_FRATH Putative uncharacterized E.VHMOVAGNKK.E             | VHMOV          | 94  | 93  | 4.098 | 0.000 |
| triQ2A3E6IQ2A3E6_FRATH Putative uncharacterized E.VHMOVAGNKK.E.N           | VHMOV          | 94  | 93  | 3.955 | 0.000 |
| triQ2A3E6IQ2A3E6_FRATH Putative uncharacterized E.VHM+16VAGNKK.E.N         | VHMOV          | 94  | 93  | 2.252 | 0.002 |
| triQ2A3E6IQ2A3E6_FRATH Putative uncharacterized E.VHMLVLAGNKK.E            | VHMLV          | 94  | 94  | 3.392 | 0.003 |
| triQ2A3E6IQ2A3E6_FRATH Putative uncharacterized E.VHMLVLAGNKK.E.N          | VHMLV          | 94  | 94  | 2.521 | 0.006 |
| triQ2A3F2IQ2A3F2_FRATH RNA polymerase sigma fa R.VPVHMIETINAGNKK.E         | VPVHMIETIN     | 577 | 425 | 2.113 | 0.004 |
| triQ2A3F6IQ2A3F6_FRATH D-alanyl-D-alanine carboxyl R.IVELSNASNIAGNKK.E     | IVELSNASNI     | 467 | 206 | 2.429 | 0.000 |
| triQ2A3G5IQ2A3G5_FRATH Putative uncharacterized K.KDEYIEINLAGNKK.E         | KDEYIEINL      | 188 | 12  | 2.552 | 0.006 |
| triQ2A3J9IQ2A3J9_FRATH Putative uncharacterized K.ITHAAGNKK.E              | ITHA           | 167 | 79  | 2.572 | 0.002 |
| triQ2A3K0IQ2A3K0_FRATH AhpC/Tsa family protein I D.FAKAAGNKK.E.N           | FAKA           | 199 | 31  | 3.571 | 0.005 |
| triQ2A3K2IQ2A3K2_FRATH Putative uncharacterized R.AAAGLSGAYDIAGNKK.E       | AAAGLSGAYDI    | 496 | 257 | 2.854 | 0.000 |
| triQ2A3L0IQ2A3L0_FRATH Biofunctional protein, glut E.AYSAAGNKK.E           | AYSA           | 410 | 410 | 2.284 | 0.006 |
| triQ2A3L6IQ2A3L6_FRATH Putative uncharacterized K.FLNLDVFNQKQVIGAGNK.K     | FLNLDVFNQKQVIG | 128 | 50  | 2.465 | 0.008 |
| triQ2A3M3IQ2A3M3_FRATH Tyrosyl-tRNA synthetase R.FHSKEDAESAHQDFAGNKK.E     | FHSKEDAESAHQDF | 396 | 312 | 3.203 | 0.000 |
| triQ2A3M3IQ2A3M3_FRATH Tyrosyl-tRNA synthetase E.SAHQDFIAGNKK.E.N          | SAHQDFI        | 396 | 313 | 4.138 | 0.005 |
| triQ2A3N1IQ2A3N1_FRATH Soluble pyridine nucleotid R.FANNEIDVFAGNKK.E       | FANNEIDVF      | 466 | 99  | 3.051 | 0.002 |
| triQ2A3P2IQ2A3P2_FRATH Ribose-phosphate pyroph K.FKDGEIHVVVLAGNKK.E        | FKDGEIHVVVLAGN | 322 | 46  | 4.542 | 0.009 |
| triQ2A3P2IQ2A3P2_FRATH Ribose-phosphate pyroph K.VITLAPLLAQIAGNK.K         | VITLAPLLAQI    | 322 | 301 | 3.938 | 0.000 |
| triQ2A3P2IQ2A3P2_FRATH Ribose-phosphate pyroph K.VITLAPLLAQIVAGNK.K        | VITLAPLLAQIV   | 322 | 302 | 3.766 | 0.000 |

**Table S2.** Junction peptides identified by MudPIT-LC-MS-MS analysis of *F. tularensis* tmRNA- tagged proteins.

|                                                                             |                      |     |     |       |       |
|-----------------------------------------------------------------------------|----------------------|-----|-----|-------|-------|
| triQ2A3P4IQ2A3P4_FRATH Major facilitator superfam K.VAADVLPAGNKK.E          | VAADVLP              | 332 | 113 | 2.883 | 0.003 |
| triQ2A3P4IQ2A3P4_FRATH Major facilitator superfam K.YLSFAAGNKK.E            | YLSFA                | 332 | 191 | 2.957 | 0.001 |
| triQ2A3P8IQ2A3P8_FRATH Putative uncharacterized K.VYLSGLFSDVC+57AGNK.K      | VYLSGLFSDVC          | 167 | 113 | 2.987 | 0.000 |
| triQ2A3Q1IQ2A3Q1_FRATH Histidine decarboxylase F D.NFYIHLDGAGNKK.E          | NFYIHLDG             | 378 | 195 | 3.225 | 0.002 |
| triQ2A3R1IQ2A3R1_FRATH DJ-1/Pfpl family protein F E.SVKIVSTPAAGNKK.E        | SVKIVSTPA            | 219 | 194 | 3.753 | 0.000 |
| triQ2A3R1IQ2A3R1_FRATH DJ-1/Pfpl family protein F E.KVVSYSIAGNKK.E          | KVVSYSI              | 219 | 219 | 2.626 | 0.002 |
| triQ2A3R3IQ2A3R3_FRATH Ferritin-like protein FTL_C R.NFNAPSLAGNKK.K         | NFNAPSL              | 166 | 166 | 3.773 | 0.000 |
| triQ2A3R3IQ2A3R3_FRATH Ferritin-like protein FTL_C R.NFNAPSLAGNKK.E         | NFNAPSL              | 166 | 166 | 3.513 | 0.000 |
| triQ2A3T8IQ2A3T8_FRATH Histone-like protein HU fo K.GLKDAVKAGNKK.K          | GLKDAVK              | 90  | 90  | 3.237 | 0.008 |
| triQ2A3T9IQ2A3T9_FRATH ATP-dependent protease K.ALLLLSYLAGNKK.K             | ALLLLSYL             | 774 | 203 | 3.082 | 0.000 |
| triQ2A3T9IQ2A3T9_FRATH ATP-dependent protease E.QVKAIYKELGEAAGNKK.E         | QVKAIYKELGEA         | 774 | 247 | 2.71  | 0.000 |
| triQ2A3V2IQ2A3V2_FRATH Putative uncharacterized D.CDEIKLLDILNWFAGNKK.E      | CDEIKLLDILNWF        | 316 | 97  | 2.442 | 0.009 |
| triQ2A3V3IQ2A3V3_FRATH Beta-lactamase FTL_087 E.NKYDGKIGIYTLNTDDKTNIAGNKK.E | NKYDGKIGIYTLNTDDKTNI | 287 | 49  | 3.242 | 0.000 |
| triQ2A3V3IQ2A3V3_FRATH Beta-lactamase FTL_087 E.SYHFAGNKK.E                 | SYHF                 | 287 | 57  | 3.678 | 0.001 |
| triQ2A3V3IQ2A3V3_FRATH Beta-lactamase FTL_087 K.YNESYHFAGNKK.E              | YNESYHF              | 287 | 57  | 4.085 | 0.001 |
| triQ2A3V3IQ2A3V3_FRATH Beta-lactamase FTL_087 K.YNESYHFAGNKK.K              | YNESYHF              | 287 | 57  | 3.992 | 0.002 |
| triQ2A3V3IQ2A3V3_FRATH Beta-lactamase FTL_087 E.SYHFAGNKK.E                 | SYHF                 | 287 | 58  | 3.355 | 0.001 |
| triQ2A3V3IQ2A3V3_FRATH Beta-lactamase FTL_087 K.YNESYHFAGNKK.E              | YNESYHF              | 287 | 58  | 4.113 | 0.000 |
| triQ2A3V3IQ2A3V3_FRATH Beta-lactamase FTL_087 E.SYHFPIAGNKK.E               | SYHFPI               | 287 | 59  | 3.483 | 0.000 |
| triQ2A3V3IQ2A3V3_FRATH Beta-lactamase FTL_087 E.SYHFPIAGNKK.E               | SYHFPI               | 287 | 59  | 2.717 | 0.002 |
| triQ2A3V3IQ2A3V3_FRATH Beta-lactamase FTL_087 K.YNESYHFPIAGNKK.E            | YNESYHFPI            | 287 | 59  | 4.058 | 0.001 |
| triQ2A3V3IQ2A3V3_FRATH Beta-lactamase FTL_087 K.YNESYHFPIAGNKK.K            | YNESYHFPI            | 287 | 59  | 4.003 | 0.000 |
| triQ2A3V3IQ2A3V3_FRATH Beta-lactamase FTL_087 E.SYHFPIAGNKK.E               | SYHFPI               | 287 | 60  | 2.233 | 0.009 |
| triQ2A3V3IQ2A3V3_FRATH Beta-lactamase FTL_087 K.YNESYHFPIAGNKK.K            | YNESYHFPI            | 287 | 60  | 3.946 | 0.004 |
| triQ2A3V3IQ2A3V3_FRATH Beta-lactamase FTL_087 K.YNESYHFPIAGNKK.E            | YNESYHFPI            | 287 | 60  | 3.944 | 0.001 |
| triQ2A3V3IQ2A3V3_FRATH Beta-lactamase FTL_087 E.SYHFPIAGNKK.E               | SYHFPI               | 287 | 62  | 3.85  | 0.000 |
| triQ2A3V3IQ2A3V3_FRATH Beta-lactamase FTL_087 E.SYHFPIAGNKK.E               | SYHFPI               | 287 | 62  | 2.255 | 0.001 |
| triQ2A3V3IQ2A3V3_FRATH Beta-lactamase FTL_087 K.YNESYHFPIAGNKK.E            | YNESYHFPI            | 287 | 62  | 3.885 | 0.000 |
| triQ2A3V3IQ2A3V3_FRATH Beta-lactamase FTL_087 E.SYHFPIAGNKK.E               | SYHFPI               | 287 | 63  | 4.091 | 0.005 |
| triQ2A3V3IQ2A3V3_FRATH Beta-lactamase FTL_087 E.SYHFPIAGNKK.E               | SYHFPI               | 287 | 63  | 4.034 | 0.002 |
| triQ2A3V3IQ2A3V3_FRATH Beta-lactamase FTL_087 K.FLLVGAIAGNKK.K              | FLLVGAI              | 287 | 71  | 4.111 | 0.001 |
| triQ2A3V3IQ2A3V3_FRATH Beta-lactamase FTL_087 K.KIPINQDDIAGNKK.E            | KIPINQDDI            | 287 | 93  | 3.792 | 0.000 |
| triQ2A3V3IQ2A3V3_FRATH Beta-lactamase FTL_087 K.TLTISQLNAGNKK.E             | TLTISQLN             | 287 | 116 | 4.007 | 0.000 |

**Table S2.** Junction peptides identified by MudPIT-LC-MS-MS analysis of *F. tularensis* tmRNA- tagged proteins.

|                                                                                |                          |     |     |       |       |
|--------------------------------------------------------------------------------|--------------------------|-----|-----|-------|-------|
| triQ2A3V3IQ2A3V3_FRATH Beta-lactamase FTL_087 K.TLTISQLNYAAILSDSPASNIAGNKK.E   | TLTISQLNYAAILSDSPASNI    | 287 | 129 | 2.391 | 0.003 |
| triQ2A3V3IQ2A3V3_FRATH Beta-lactamase FTL_087 E.INYTQPHSNAGNKKE.N              | INYTQPHSN                | 287 | 169 | 4.063 | 0.000 |
| triQ2A3V3IQ2A3V3_FRATH Beta-lactamase FTL_087 E.INYTQPHSNIAGNK.K               | INYTQPHSNI               | 287 | 170 | 3.842 | 0.000 |
| triQ2A3V3IQ2A3V3_FRATH Beta-lactamase FTL_087 K.LGDNDTIITADEPEINYTPHNSIAGNKK.K | LGDNNDTIITADEPEINYTPHNSI | 287 | 170 | 3.36  | 0.000 |
| triQ2A3V3IQ2A3V3_FRATH Beta-lactamase FTL_087 K.HKDIFIKAGNK.K                  | HKDIFIK                  | 287 | 201 | 3.567 | 0.001 |
| triQ2A3V3IQ2A3V3_FRATH Beta-lactamase FTL_087 D.VAIIWAGNKKE.N                  | VAIIW                    | 287 | 243 | 4.004 | 0.001 |
| triQ2A3V3IQ2A3V3_FRATH Beta-lactamase FTL_087 D.VAIIWVAGNKKE.N                 | VAIIWP                   | 287 | 244 | 3.541 | 0.001 |
| triQ2A3V3IQ2A3V3_FRATH Beta-lactamase FTL_087 K.NQQPIALGAGNK.K                 | NQQPIALG                 | 287 | 253 | 3.565 | 0.000 |
| triQ2A3V3IQ2A3V3_FRATH Beta-lactamase FTL_087 K.NQQPIALGAGNKK.E                | NQQPIALG                 | 287 | 253 | 3.296 | 0.000 |
| triQ2A3V3IQ2A3V3_FRATH Beta-lactamase FTL_087 K.NQQPIALGIAGNK.K                | NQQPIALGI                | 287 | 254 | 4.064 | 0.000 |
| triQ2A3V3IQ2A3V3_FRATH Beta-lactamase FTL_087 K.NQQPIALGIAGNKK.E               | NQQPIALGI                | 287 | 254 | 3.045 | 0.001 |
| triQ2A3V3IQ2A3V3_FRATH Beta-lactamase FTL_087 K.NQQPIALGILAGNK.K               | NQQPIALGIL               | 287 | 255 | 4.433 | 0.000 |
| triQ2A3V3IQ2A3V3_FRATH Beta-lactamase FTL_087 K.NQQPIALGILAGNKK.E              | NQQPIALGIL               | 287 | 255 | 4.197 | 0.000 |
| triQ2A3V3IQ2A3V3_FRATH Beta-lactamase FTL_087 K.NQQPIALGILYAGNK.K              | NQQPIALGILY              | 287 | 256 | 4.309 | 0.000 |
| triQ2A3V3IQ2A3V3_FRATH Beta-lactamase FTL_087 K.NQQPIALGILYTAGNK.K             | NQQPIALGILYT             | 287 | 257 | 3.185 | 0.003 |
| triQ2A3V3IQ2A3V3_FRATH Beta-lactamase FTL_087 K.NQQPIALGILYTNAGNK.K            | NQQPIALGILYTN            | 287 | 258 | 4.051 | 0.000 |
| triQ2A3V3IQ2A3V3_FRATH Beta-lactamase FTL_087 K.NQQPIALGILYTNPAGNKK.E          | NQQPIALGILYTNP           | 287 | 259 | 4.425 | 0.000 |
| triQ2A3V3IQ2A3V3_FRATH Beta-lactamase FTL_087 K.NQQPIALGILYTNPAGNK.K           | NQQPIALGILYTNP           | 287 | 259 | 4.406 | 0.000 |
| triQ2A3V3IQ2A3V3_FRATH Beta-lactamase FTL_087 K.NQQPIALGILYTNPNAGNK.K          | NQQPIALGILYTNPN          | 287 | 260 | 4.366 | 0.003 |
| triQ2A3V3IQ2A3V3_FRATH Beta-lactamase FTL_087 K.NQQPIALGILYTNPNDKNAAGNKK.E     | NQQPIALGILYTNPNDKNA      | 287 | 264 | 2.871 | 0.010 |
| triQ2A3V3IQ2A3V3_FRATH Beta-lactamase FTL_087 K.NQQPIALGILYTNPNDKNAPSAGNKK.E   | NQQPIALGILYTNPNDKNAPS    | 287 | 267 | 3.151 | 0.000 |
| triQ2A3V3IQ2A3V3_FRATH Beta-lactamase FTL_087 K.NAPSNEEIIQAGNK.K               | NAPSNEEIIQ               | 287 | 272 | 3.784 | 0.008 |
| triQ2A3V3IQ2A3V3_FRATH Beta-lactamase FTL_087 E.IIQQAAKLIANDAGNKKE.N           | IIQQAAKLIAND             | 287 | 281 | 4.205 | 0.000 |
| triQ2A3V3IQ2A3V3_FRATH Beta-lactamase FTL_087 E.IIQQAAKLIANDLAGNKKE.N          | IIQQAAKLIANDL            | 287 | 282 | 3.196 | 0.000 |
| triQ2A3V3IQ2A3V3_FRATH Beta-lactamase FTL_087 K.LIANDLAGNKK.E                  | LIANDL                   | 287 | 282 | 3.708 | 0.005 |
| triQ2A3V3IQ2A3V3_FRATH Beta-lactamase FTL_087 E.IIQQAAKLIANDLTNAGNKKE.N        | IIQQAAKLIANDLTN          | 287 | 284 | 3.389 | 0.000 |
| triQ2A3V3IQ2A3V3_FRATH Beta-lactamase FTL_087 K.LIANDLTNAGNKKE.E               | LIANDLTN                 | 287 | 284 | 3.437 | 0.000 |
| triQ2A3V3IQ2A3V3_FRATH Beta-lactamase FTL_087 E.IIQQAAKLIANDLTNTAGNKKE.N       | IIQQAAKLIANDLTNT         | 287 | 285 | 3.393 | 0.000 |
| triQ2A3V3IQ2A3V3_FRATH Beta-lactamase FTL_087 K.LIANDLTNTAGNK.K                | LIANDLTNT                | 287 | 285 | 4.176 | 0.000 |
| triQ2A3V3IQ2A3V3_FRATH Beta-lactamase FTL_087 K.LIANDLTNTAGNKK.E               | LIANDLTNT                | 287 | 285 | 4.116 | 0.000 |
| triQ2A3V3IQ2A3V3_FRATH Beta-lactamase FTL_087 E.IIQQAAKLIANDLTNTYAGNKKE.N      | IIQQAAKLIANDLTNTY        | 287 | 286 | 4.145 | 0.002 |
| triQ2A3V3IQ2A3V3_FRATH Beta-lactamase FTL_087 K.LIANDLTNTYAGNK.E               | LIANDLTNTY               | 287 | 286 | 3.943 | 0.005 |
| triQ2A3W0IQ2A3W0_FRATI Putative uncharacterized K.FLGYIDRAGNKK.E               | FLGYIDR                  | 59  | 48  | 2.904 | 0.005 |

**Table S2.** Junction peptides identified by MudPIT-LC-MS-MS analysis of *F. tularensis* tmRNA- tagged proteins.

|                                                   |                                 |                        |     |     |       |       |
|---------------------------------------------------|---------------------------------|------------------------|-----|-----|-------|-------|
| triQ2A3W0IQ2A3W0_FRATI Putative uncharacterized   | K.FLGYIDRIAGNKK.E               | FLGYIDRII              | 59  | 50  | 2.114 | 0.005 |
| triQ2A3W3IQ2A3W3_FRATI Putative uncharacterized   | D.FNLIGENVLAGGNK.K              | FNLIGENVLAG            | 485 | 404 | 2.319 | 0.005 |
| triQ2A3Y0IQ2A3Y0_FRATH Putative uncharacterized   | E.VVDKNNGTGWINLDKLAGNKK.E       | VVDKNNGTGWINLDKL       | 176 | 110 | 2.853 | 0.000 |
| triQ2A3Y0IQ2A3Y0_FRATH Putative uncharacterized   | E.YTKVQDQKISAGNKK.E             | YTKVQDQKIS             | 176 | 142 | 3.933 | 0.002 |
| triQ2A3Y0IQ2A3Y0_FRATH Putative uncharacterized   | E.YTKVQDQKISQAGNKK.E            | YTKVQDQKISQ            | 176 | 143 | 3.1   | 0.000 |
| triQ2A3Y0IQ2A3Y0_FRATH Putative uncharacterized   | E.YTKVQDQKISQLAGNKK.E           | YTKVQDQKISQL           | 176 | 144 | 4.199 | 0.000 |
| triQ2A3Y0IQ2A3Y0_FRATH Putative uncharacterized   | K.ISQLHAMAGNKK.E                | ISQLHAM                | 176 | 147 | 3.731 | 0.001 |
| triQ2A3Y0IQ2A3Y0_FRATH Putative uncharacterized   | K.ISQLHAMAGNKK.E                | ISQLHAM                | 176 | 147 | 3.535 | 0.000 |
| triQ2A3Y0IQ2A3Y0_FRATH Putative uncharacterized   | K.ISQLHAM+16AGNKK.E             | ISQLHAM                | 176 | 147 | 3.303 | 0.000 |
| triQ2A3Y2IQ2A3Y2_FRATH Preprotein translocase, st | K.LINVATIQSALGSAGNKK.E          | LINVATIQSALGS          | 645 | 432 | 2.755 | 0.000 |
| triQ2A3Y2IQ2A3Y2_FRATH Preprotein translocase, st | K.LINVATIQSALGSQFAGNKK.E        | LINVATIQSALGSQF        | 645 | 434 | 3.9   | 0.000 |
| triQ2A3Y4IQ2A3Y4_FRATH Isochorismatase hydrolase  | E.ASLTNLSRIADIVDIDDFIAGNKK.E    | ASLTNLSRIADIVDIDDFI    | 190 | 190 | 3.675 | 0.000 |
| triQ2A404IQ2A404_FRATH Hypothetical lipoprotein F | K.SYQYENVAGNKK.E                | SYQYENV                | 130 | 102 | 3.973 | 0.003 |
| triQ2A404IQ2A404_FRATH Hypothetical lipoprotein F | K.SYQYENVETALVSLVAGNKK.E        | SYQYENVETALVSLV        | 130 | 110 | 2.568 | 0.001 |
| triQ2A404IQ2A404_FRATH Hypothetical lipoprotein F | K.SYQYENVETALVSLVAGNKK.E        | SYQYENVETALVSLV        | 130 | 110 | 2.043 | 0.001 |
| triQ2A404IQ2A404_FRATH Hypothetical lipoprotein F | E.TALVSLVAGNKK.E                | TALVSLV                | 130 | 110 | 4.081 | 0.006 |
| triQ2A404IQ2A404_FRATH Hypothetical lipoprotein F | K.SYQYENVETALVSLVESAGNKK.E      | SYQYENVETALVSLVES      | 130 | 112 | 2.583 | 0.001 |
| triQ2A404IQ2A404_FRATH Hypothetical lipoprotein F | K.SYQYENVETALVSLVESSTAGNKK.E    | SYQYENVETALVSLVESST    | 130 | 115 | 2.471 | 0.007 |
| triQ2A405IQ2A405_FRATH Putative uncharacterized   | E.RAQGAAYVPPAGNKK.E             | RAQGAAYVPP             | 83  | 47  | 4.224 | 0.000 |
| triQ2A405IQ2A405_FRATH Putative uncharacterized   | E.RAQGAAYVPPDAGNKK.E            | RAQGAAYVPPD            | 83  | 48  | 2.387 | 0.002 |
| triQ2A405IQ2A405_FRATH Putative uncharacterized   | R.AQGAAYVPPDREFAGNKK.E          | AQGAAYVPPDREF          | 83  | 51  | 3.176 | 0.001 |
| triQ2A405IQ2A405_FRATH Putative uncharacterized   | R.AQGAAYVPPDREFIAGNKK.E         | AQGAAYVPPDREFI         | 83  | 52  | 2.941 | 0.001 |
| triQ2A405IQ2A405_FRATH Putative uncharacterized   | R.LFWSYSRPAGNKK.E               | LFWSYSRP               | 83  | 83  | 3.611 | 0.000 |
| triQ2A420IQ2A420_FRATH Type IV pilin multimeric o | E.FAGLNLVVAGNKK.E               | FAGLNLVV               | 590 | 207 | 2.822 | 0.001 |
| triQ2A422IQ2A422_FRATH Type IV pili glycosylation | E.RHSIPIFLAGNKK.E               | RHSIPIFL               | 198 | 107 | 2.241 | 0.001 |
| triQ2A441IQ2A441_FRATH Gamma-glutamyltranspe      | K.LAEDGIPVSYDLHQSLVTAKPWAGNKK.E | LAEDGIPVSYDLHQSLVTAKPW | 601 | 218 | 3.665 | 0.000 |
| triQ2A441IQ2A441_FRATH Gamma-glutamyltranspe      | K.ITTDKHIPSKDIAGNKK.E           | ITTDKHIPSKDI           | 601 | 399 | 2.806 | 0.000 |
| triQ2A441IQ2A441_FRATH Gamma-glutamyltranspe      | K.LQTTHFSAGNKK.E                | LQTTHFS                | 601 | 416 | 3.058 | 0.000 |
| triQ2A460IQ2A460_FRATH Oxidoreductase, short-ch   | E.VVIAATKAGNKK.E                | VVIAATK                | 240 | 237 | 4.269 | 0.000 |
| triQ2A460IQ2A460_FRATH Oxidoreductase, short-ch   | E.VVIAATKAGNKK.E                | VVIAATK                | 240 | 237 | 2.291 | 0.009 |
| triQ2A460IQ2A460_FRATH Oxidoreductase, short-ch   | E.VVIAATKQAGNKK.E               | VVIAATKQ               | 240 | 238 | 4.081 | 0.000 |
| triQ2A460IQ2A460_FRATH Oxidoreductase, short-ch   | E.VVIAATKQPAGNKK.E              | VVIAATKQP              | 240 | 239 | 4.078 | 0.000 |
| triQ2A460IQ2A460_FRATH Oxidoreductase, short-ch   | E.VVIAATKQPAAGNKK.E             | VVIAATKQPA             | 240 | 240 | 3.819 | 0.000 |

**Table S2.** Junction peptides identified by MudPIT-LC-MS-MS analysis of *F. tularensis* tmRNA- tagged proteins.

|                                                        |                                    |                           |      |      |       |       |
|--------------------------------------------------------|------------------------------------|---------------------------|------|------|-------|-------|
| triQ2A484IQ2A484_FRATH Ribonuclease E FTL_0717         | K.TTQATALTIAGNKK.E                 | TTQATALTI                 | 843  | 420  | 4.105 | 0.000 |
| triQ2A490IQ2A490_FRATH Proton-dependent oligope        | K.QLQNLVVAGNKK.E                   | QLQNLVV                   | 197  | 130  | 2.375 | 0.004 |
| triQ2A4A7IQ2A4A7_FRATH Putative uncharacterized        | E.YILDHNIVNAGNKK.E                 | YILDHNIVN                 | 232  | 112  | 3.186 | 0.000 |
| triQ2A4A7IQ2A4A7_FRATH Putative uncharacterized        | K.NTQNFKPLAGNK.K                   | NTQNFKPL                  | 232  | 228  | 3.938 | 0.000 |
| triQ2A4D9IQ2A4D9_FRATH Putative uncharacterized        | K.GLHANQAAGNKK.E                   | GLHANQA                   | 544  | 105  | 2.262 | 0.000 |
| triQ2A4D9IQ2A4D9_FRATH Putative uncharacterized        | E.GLSIANLAAVAAGNKK.E               | GLSIANLAAVA               | 544  | 127  | 3.562 | 0.000 |
| triQ2A4D9IQ2A4D9_FRATH Putative uncharacterized        | K.VEGLSIANLAAVANSNLVSSEVAGNKK.E    | VEGLSIANLAAVANSNLVSSEV    | 544  | 136  | 2.832 | 0.000 |
| triQ2A4D9IQ2A4D9_FRATH Putative uncharacterized        | K.VEGLSIANLAAVANSNLVSSEVDPAGNKK.E  | VEGLSIANLAAVANSNLVSSEVDP  | 544  | 138  | 2.367 | 0.005 |
| triQ2A4D9IQ2A4D9_FRATH Putative uncharacterized        | K.QLADNQGLFSIAMNSLGQTIYNLEIAGNKK.E | QLADNQGLFSIAMNSLGQTIYNLEI | 544  | 164  | 2.699 | 0.000 |
| triQ2A4D9IQ2A4D9_FRATH Putative uncharacterized        | E.INYNYNNSAGNKK.E                  | INYNYNNS                  | 544  | 171  | 2.722 | 0.002 |
| triQ2A4D9IQ2A4D9_FRATH Putative uncharacterized        | E.INYNYNNSIAGNKK.E                 | INYNYNNSI                 | 544  | 173  | 4.108 | 0.001 |
| triQ2A4D9IQ2A4D9_FRATH Putative uncharacterized        | K.GSPIIQVFSALAGNK.K                | GSPIIQVFSAL               | 544  | 341  | 3.409 | 0.000 |
| triQ2A4D9IQ2A4D9_FRATH Putative uncharacterized        | K.LNLLPYLGAGNK.K                   | LNLLPYLG                  | 544  | 394  | 2.921 | 0.003 |
| triQ2A4D9IQ2A4D9_FRATH Putative uncharacterized        | K.LNLLPYLGIAGNK.K                  | LNLLPYLGI                 | 544  | 395  | 3.824 | 0.000 |
| triQ2A4D9IQ2A4D9_FRATH Putative uncharacterized        | K.FLQQTLSAFAAGNK.K                 | FLQQTLSAFA                | 544  | 471  | 2.192 | 0.008 |
| triQ2A4D9IQ2A4D9_FRATH Putative uncharacterized        | K.ANKPVNENALLNMLVAAGNK.K           | ANKPVNENALLNMLVA          | 544  | 501  | 3.021 | 0.000 |
| triQ2A4D9IQ2A4D9_FRATH Putative uncharacterized        | E.NALLNMLVAAGNK.K                  | NALLNMLVA                 | 544  | 501  | 2.392 | 0.000 |
| triQ2A4E4IQ2A4E4_FRATH Hypothetical membrane p         | E.IQDIPKNQTLAGNKK.E                | IQDIPKNQTL                | 361  | 252  | 4.219 | 0.002 |
| triQ2A4H6IQ2A4H6_FRATH Putative uncharacterized        | K.IADLNETYQHNINDILIESLEHAGNK.K     | IADLNETYQHNINDILIESLEH    | 146  | 98   | 2.98  | 0.001 |
| triQ2A4H6IQ2A4H6_FRATH Putative uncharacterized        | K.IADLNETYQHNINDILIESLEHAGNKK.E    | IADLNETYQHNINDILIESLEH    | 146  | 98   | 2.384 | 0.001 |
| triQ2A4H6IQ2A4H6_FRATH Putative uncharacterized        | K.KAVSAYYAGNKK.E                   | KAVSAYY                   | 146  | 107  | 3.903 | 0.002 |
| triQ2A4I2IQ2A4I2_FRATH Transcription termination       | K.YFAVKAGNKK.E                     | YFAVK                     | 420  | 113  | 4.06  | 0.000 |
| triQ2A4I2IQ2A4I2_FRATH Transcription termination       | K.YFAVKAGNK.K                      | YFAVK                     | 420  | 113  | 3.721 | 0.000 |
| triQ2A4K2IQ2A4K2_FRATH ATP-dependent helicase F E.LFTA | AAGNKK.E                           | LFTA                      | 1444 | 1310 | 3.439 | 0.002 |
| triQ2A4K4IQ2A4K4_FRATH Isocitrate dehydrogenase        | K.TFNTILAQIAGNK.K                  | TFNTILAQI                 | 738  | 738  | 2.706 | 0.000 |
| triQ2A4K6IQ2A4K6_FRATH Long chain fatty acid CoA       | K.KVPLNIDIPAGNKK.E                 | KVPLNIDIP                 | 562  | 21   | 2.215 | 0.008 |
| triQ2A4K8IQ2A4K8_FRATH Fusion product of 3-hydr        | K.IAVLGAGTAGNKK.E                  | IAVLGAGT                  | 898  | 127  | 4.125 | 0.002 |
| triQ2A4K8IQ2A4K8_FRATH Fusion product of 3-hydr        | K.IAVLGAGTMGAQAGNK.K               | IAVLGAGTMGAQ              | 898  | 131  | 3.628 | 0.000 |
| triQ2A4L9IQ2A4L9_FRATH Putative uncharacterized        | K.TISDQVIGAIYPLAGNKK.E             | TISDQVIGAIYPL             | 327  | 242  | 2.563 | 0.009 |
| triQ2A4L9IQ2A4L9_FRATH Putative uncharacterized        | K.TISDQVIGAIYPLQVAGNK.K            | TISDQVIGAIYPLQV           | 327  | 244  | 3.693 | 0.000 |
| triQ2A4L9IQ2A4L9_FRATH Putative uncharacterized        | K.TISDQVIGAIYPLQVLGAGNK.K          | TISDQVIGAIYPLQVL          | 327  | 245  | 4.221 | 0.000 |
| triQ2A4M0IQ2A4M0_FRATH Putative uncharacterized        | K.SSAEEILNDVMENYIDQAGNKK.E         | SSAEEILNDVMENYIDQ         | 476  | 84   | 2.341 | 0.008 |
| triQ2A4M0IQ2A4M0_FRATH Putative uncharacterized        | E.NYIDQNNLRDRAGNKK.E               | NYIDQNNLRDR               | 476  | 90   | 2.066 | 0.006 |

**Table S2.** Junction peptides identified by MudPIT-LC-MS-MS analysis of *F. tularensis* tmRNA- tagged proteins.

|                        |                          |                                    |                           |     |     |       |       |
|------------------------|--------------------------|------------------------------------|---------------------------|-----|-----|-------|-------|
| triQ2A4M0IQ2A4MO_FRAT+ | Putative uncharacterized | E.NYIDQNLRDRYDYVGSAGTASVAGNKK.E    | NYIDQNLRDRYDYVGSAGTASV    | 476 | 103 | 2.55  | 0.000 |
| triQ2A4M0IQ2A4MO_FRAT+ | Putative uncharacterized | R.DRYDYVGSAGTASVNQTSAGNKK.E        | DRYDYVGSAGTASVNQTS        | 476 | 108 | 2.916 | 0.000 |
| triQ2A4M0IQ2A4MO_FRAT+ | Putative uncharacterized | R.DRYDYVGSAGTASVNQTSNYVAGNKK.E     | DRYDYVGSAGTASVNQTSNYV     | 476 | 111 | 3.423 | 0.000 |
| triQ2A4M0IQ2A4MO_FRAT+ | Putative uncharacterized | K.AQAEYISFAGNKK.E                  | AQAEYISF                  | 476 | 132 | 4.004 | 0.000 |
| triQ2A4M0IQ2A4MO_FRAT+ | Putative uncharacterized | K.AQAEYISFIAGNKK.E                 | AQAEYISFI                 | 476 | 133 | 4.191 | 0.000 |
| triQ2A4M0IQ2A4MO_FRAT+ | Putative uncharacterized | E.YISFISAAGNKK.E                   | YISFISA                   | 476 | 135 | 3.564 | 0.006 |
| triQ2A4M0IQ2A4MO_FRAT+ | Putative uncharacterized | E.YISFISANAGNKK.E                  | YISFISAN                  | 476 | 136 | 4.181 | 0.002 |
| triQ2A4M0IQ2A4MO_FRAT+ | Putative uncharacterized | K.SLNIDSTQGSAGNKK.E                | SLNIDSTQGS                | 476 | 151 | 4.261 | 0.000 |
| triQ2A4M0IQ2A4MO_FRAT+ | Putative uncharacterized | K.SLNIDSTQGSTAGNKK.E               | SLNIDSTQGST               | 476 | 152 | 4.227 | 0.000 |
| triQ2A4M0IQ2A4MO_FRAT+ | Putative uncharacterized | E.YISFISANTKVNKSLNIDSTQGSTAGNK.K   | YISFISANTKVNKSLNIDSTQGST  | 476 | 152 | 3.207 | 0.000 |
| triQ2A4M0IQ2A4MO_FRAT+ | Putative uncharacterized | K.SLNIDSTQGSTAAGNKK.E              | SLNIDSTQGSTA              | 476 | 153 | 2.612 | 0.000 |
| triQ2A4M0IQ2A4MO_FRAT+ | Putative uncharacterized | E.IDTYADKAGNKK.E                   | IDTYADK                   | 476 | 162 | 3.898 | 0.009 |
| triQ2A4M0IQ2A4MO_FRAT+ | Putative uncharacterized | E.IDTYADKPAGNKK.E                  | IDTYADKP                  | 476 | 163 | 3.465 | 0.006 |
| triQ2A4M0IQ2A4MO_FRAT+ | Putative uncharacterized | E.IDTYADKPKQGTAGNKK.E              | IDTYADKPKQGT              | 476 | 167 | 3.427 | 0.001 |
| triQ2A4M0IQ2A4MO_FRAT+ | Putative uncharacterized | E.IDTYADKPKQGTQAAIAGNKK.E          | IDTYADKPKQGTQAAI          | 476 | 171 | 3.034 | 0.000 |
| triQ2A4M0IQ2A4MO_FRAT+ | Putative uncharacterized | E.IDTYADKPKQGTQAAIDAGNKK.E         | IDTYADKPKQGTQAAID         | 476 | 172 | 2.356 | 0.000 |
| triQ2A4M0IQ2A4MO_FRAT+ | Putative uncharacterized | E.IDTYADKPKQGTQAAIDAKAGNKK.E       | IDTYADKPKQGTQAAIDAK       | 476 | 174 | 2.241 | 0.000 |
| triQ2A4M0IQ2A4MO_FRAT+ | Putative uncharacterized | E.IDTYADKPKQGTQAAIDAKQKALDEAGNKK.E | IDTYADKPKQGTQAAIDAKQKALDE | 476 | 180 | 2.1   | 0.001 |
| triQ2A4M0IQ2A4MO_FRAT+ | Putative uncharacterized | K.SLTTGFNLAGNKK.E                  | SLTTGFNLAGNKK.E           | 476 | 224 | 4.249 | 0.001 |
| triQ2A4M0IQ2A4MO_FRAT+ | Putative uncharacterized | K.SLTTGFNLSAGNKK.E                 | SLTTGFNLS                 | 476 | 225 | 3.938 | 0.000 |
| triQ2A4M0IQ2A4MO_FRAT+ | Putative uncharacterized | K.SLTTGFNLSGAGNKK.E                | SLTTGFNLSG                | 476 | 226 | 4.014 | 0.000 |
| triQ2A4M0IQ2A4MO_FRAT+ | Putative uncharacterized | K.SLTTGFNLSGLAGNKK.E               | SLTTGFNLSGL               | 476 | 227 | 4.323 | 0.000 |
| triQ2A4M0IQ2A4MO_FRAT+ | Putative uncharacterized | K.SLTTGFNLSGLAGNK.K                | SLTTGFNLSGL               | 476 | 227 | 4.069 | 0.000 |
| triQ2A4M0IQ2A4MO_FRAT+ | Putative uncharacterized | K.SLTTGFNLSGLLAGNK.K               | SLTTGFNLSGLL              | 476 | 228 | 4.342 | 0.000 |
| triQ2A4M0IQ2A4MO_FRAT+ | Putative uncharacterized | K.SLTTGFNLSGLLAGNKK.E              | SLTTGFNLSGLL              | 476 | 228 | 4.111 | 0.000 |
| triQ2A4M0IQ2A4MO_FRAT+ | Putative uncharacterized | K.SLTTGFNLSGLLPAGNK.K              | SLTTGFNLSGLLP             | 476 | 229 | 4.074 | 0.000 |
| triQ2A4M0IQ2A4MO_FRAT+ | Putative uncharacterized | K.SLTTGFNLSGLLPKTFAGNKK.E          | SLTTGFNLSGLLPKTF          | 476 | 233 | 3.234 | 0.000 |
| triQ2A4M0IQ2A4MO_FRAT+ | Putative uncharacterized | K.DGNAAIGVVAGNKK.E                 | DGNAAIGVV                 | 476 | 246 | 2.567 | 0.009 |
| triQ2A4M0IQ2A4MO_FRAT+ | Putative uncharacterized | E.KDGNAAIGVVAGNKK.E                | KDGNAAIGVV                | 476 | 246 | 3.908 | 0.000 |
| triQ2A4M0IQ2A4MO_FRAT+ | Putative uncharacterized | K.GMFEDIKHGAGNKK.E                 | GMFEDIKHG                 | 476 | 263 | 3.805 | 0.000 |
| triQ2A4M0IQ2A4MO_FRAT+ | Putative uncharacterized | K.GMFEDIKHGNEAGNKK.E               | GMFEDIKHGNE               | 476 | 265 | 3.949 | 0.000 |
| triQ2A4M0IQ2A4MO_FRAT+ | Putative uncharacterized | K.GMFEDIKHGNEPVAGNKK.E             | GMFEDIKHGNEPV             | 476 | 267 | 3.144 | 0.000 |
| triQ2A4M0IQ2A4MO_FRAT+ | Putative uncharacterized | K.GMFEDIKHGNEPVIAGNKK.E            | GMFEDIKHGNEPVI            | 476 | 268 | 3.38  | 0.000 |



**Table S2.** Junction peptides identified by MudPIT-LC-MS-MS analysis of *F. tularensis* tmRNA- tagged proteins.

|                                                  |                               |                      |     |     |       |       |
|--------------------------------------------------|-------------------------------|----------------------|-----|-----|-------|-------|
| triQ2A4M0IQ2A4M0_FRATf- Putative uncharacterized | K.GMFEDIKHGNEPVIAGNKK.E       | GMFEDIKHGNEPVI       | 476 | 269 | 3.013 | 0.000 |
| triQ2A4M0IQ2A4M0_FRATf- Putative uncharacterized | K.GMFEDIKHGNEPVIAGNKK.E       | GMFEDIKHGNEPVI       | 476 | 269 | 2.751 | 0.000 |
| triQ2A4M0IQ2A4M0_FRATf- Putative uncharacterized | K.HGNEPVIAGNK.K               | HGNEPVI              | 476 | 269 | 3.813 | 0.000 |
| triQ2A4M0IQ2A4M0_FRATf- Putative uncharacterized | K.HGNEPVIAGNKK.E              | HGNEPVI              | 476 | 269 | 3.694 | 0.000 |
| triQ2A4M0IQ2A4M0_FRATf- Putative uncharacterized | R.VFGEDNKPAGNKK.E             | VFGEDNKP             | 476 | 304 | 4.111 | 0.000 |
| triQ2A4M0IQ2A4M0_FRATf- Putative uncharacterized | R.VFGEDNKPAGNK.K              | VFGEDNKP             | 476 | 304 | 3.545 | 0.000 |
| triQ2A4M0IQ2A4M0_FRATf- Putative uncharacterized | R.VFGEDNKPILAAGNK.K           | VFGEDNKPILA          | 476 | 308 | 4.422 | 0.000 |
| triQ2A4M0IQ2A4M0_FRATf- Putative uncharacterized | R.VFGEDNKPILAAGNKK.E          | VFGEDNKPILA          | 476 | 308 | 4.293 | 0.000 |
| triQ2A4M0IQ2A4M0_FRATf- Putative uncharacterized | R.VFGEDNKPILAYAGNKK.E         | VFGEDNKPILAY         | 476 | 309 | 3.098 | 0.000 |
| triQ2A4M0IQ2A4M0_FRATf- Putative uncharacterized | R.VFGEDNKPILAYGQAGNK.K        | VFGEDNKPILAYGQ       | 476 | 311 | 2.731 | 0.001 |
| triQ2A4M0IQ2A4M0_FRATf- Putative uncharacterized | R.VFGEDNKPILAYGQGSAGNKK.E     | VFGEDNKPILAYGQGS     | 476 | 313 | 3.394 | 0.000 |
| triQ2A4M0IQ2A4M0_FRATf- Putative uncharacterized | R.VFGEDNKPILAYGQGSYNGPAGNKK.E | VFGEDNKPILAYGQGSYNGP | 476 | 317 | 2.389 | 0.000 |
| triQ2A4M0IQ2A4M0_FRATf- Putative uncharacterized | R.ANLVTLIAGQMAGNK.K           | ANLVTLIAGQM          | 476 | 348 | 4.006 | 0.000 |
| triQ2A4M0IQ2A4M0_FRATf- Putative uncharacterized | R.ANLVTLIAGQM+16AGNK.K        | ANLVTLIAGQM          | 476 | 348 | 2.6   | 0.000 |
| triQ2A4M0IQ2A4M0_FRATf- Putative uncharacterized | R.ANLVTLIAGQMSAGNK.K          | ANLVTLIAGQMS         | 476 | 349 | 2.625 | 0.000 |
| triQ2A4M0IQ2A4M0_FRATf- Putative uncharacterized | E.DISSTLAKNTKTQAGNKK.E        | DISSTLAKNTKTQ        | 476 | 371 | 2.288 | 0.000 |
| triQ2A4M0IQ2A4M0_FRATf- Putative uncharacterized | R.RIDATAGNKK.E                | RIDAT                | 476 | 379 | 2.712 | 0.006 |
| triQ2A4M0IQ2A4M0_FRATf- Putative uncharacterized | R.RIDATDIAGNKK.E              | RIDATDI              | 476 | 381 | 4.025 | 0.003 |
| triQ2A4M0IQ2A4M0_FRATf- Putative uncharacterized | E.KTLSTYYAGNKK.E              | KTLSTYY              | 476 | 389 | 4.058 | 0.000 |
| triQ2A4M0IQ2A4M0_FRATf- Putative uncharacterized | E.KTLSTYYKAGNKK.E             | KTLSTYYK             | 476 | 390 | 4.004 | 0.001 |
| triQ2A4M0IQ2A4M0_FRATf- Putative uncharacterized | R.YKLPGTENAGNKK.E             | YKLPGTEN             | 476 | 415 | 4.087 | 0.002 |
| triQ2A4M0IQ2A4M0_FRATf- Putative uncharacterized | R.YKLPGTENIAGNKK.E            | YKLPGTENI            | 476 | 417 | 3.942 | 0.001 |
| triQ2A4M0IQ2A4M0_FRATf- Putative uncharacterized | R.YKLPGTENIAGNK.K             | YKLPGTENI            | 476 | 417 | 3.85  | 0.001 |
| triQ2A4M0IQ2A4M0_FRATf- Putative uncharacterized | R.YKLPGTENIYGAGNK.K           | YKLPGTENIYG          | 476 | 419 | 4.055 | 0.000 |
| triQ2A4M0IQ2A4M0_FRATf- Putative uncharacterized | R.YKLPGTENIYGAGNKK.E          | YKLPGTENIYG          | 476 | 419 | 3.888 | 0.000 |
| triQ2A4M0IQ2A4M0_FRATf- Putative uncharacterized | E.NIYGVVLAGNKK.E              | NIYGVV               | 476 | 422 | 4.127 | 0.000 |
| triQ2A4M0IQ2A4M0_FRATf- Putative uncharacterized | K.YLNQYAGNKK.E                | YLNQY                | 476 | 476 | 3.615 | 0.003 |
| triQ2A4M3IQ2A4M3_FRATf- Outer membrane protein   | K.LATIDDQDPNAGNKK.E           | LATIDDQDPN           | 178 | 44  | 3.839 | 0.000 |
| triQ2A4M3IQ2A4M3_FRATf- Outer membrane protein   | K.LATIDDQDPNYKAIAGNKK.E       | LATIDDQDPNYKAI       | 178 | 48  | 2.881 | 0.000 |
| triQ2A4M3IQ2A4M3_FRATf- Outer membrane protein   | K.GEWIEVVDAGNKK.E             | GEWIEVVD             | 178 | 59  | 4.232 | 0.002 |
| triQ2A4M3IQ2A4M3_FRATf- Outer membrane protein   | K.GEWIEVVDNAGNKK.E            | GEWIEVVDN            | 178 | 60  | 4.03  | 0.009 |
| triQ2A4M3IQ2A4M3_FRATf- Outer membrane protein   | E.WIEVVDNKAGNKK.E             | WIEVVDNK             | 178 | 61  | 4.172 | 0.000 |
| triQ2A4M3IQ2A4M3_FRATf- Outer membrane protein   | E.VVDNKDGAGNKK.E              | VVDNKDG              | 178 | 63  | 3.847 | 0.000 |

**Table S2.** Junction peptides identified by MudPIT-LC-MS-MS analysis of *F. tularensis* tmRNA- tagged proteins.

|                                                                               |                  |     |    |       |       |
|-------------------------------------------------------------------------------|------------------|-----|----|-------|-------|
| triQ2A4M3IQ2A4M3_FRATf- Outer membrane protein   E.WIEVVDNKDGAGNKK.E          | WIEVVDNKDG       | 178 | 63 | 3.967 | 0.000 |
| triQ2A4M3IQ2A4M3_FRATf- Outer membrane protein   K.GEWIEVVDNKDGSVAGNKK.E      | GEWIEVVDNKDGSV   | 178 | 65 | 4.089 | 0.000 |
| triQ2A4M3IQ2A4M3_FRATf- Outer membrane protein   E.VVDNKDGSVAGNKK.E           | VVDNKDGSV        | 178 | 65 | 4.174 | 0.001 |
| triQ2A4M3IQ2A4M3_FRATf- Outer membrane protein   E.VVDNKDGSVAGNKK.E           | VVDNKDGSV        | 178 | 65 | 2.248 | 0.001 |
| triQ2A4M3IQ2A4M3_FRATf- Outer membrane protein   K.GEWIEVVDNKDGSVAGNKK.E      | GEWIEVVDNKDGSVG  | 178 | 66 | 3.322 | 0.001 |
| triQ2A4M3IQ2A4M3_FRATf- Outer membrane protein   E.VVDNKDGSVAGNKK.E           | VVDNKDGSVG       | 178 | 66 | 3.938 | 0.000 |
| triQ2A4M3IQ2A4M3_FRATf- Outer membrane protein   E.VVDNKDGSVAGNKK.E           | VVDNKDGSVG       | 178 | 66 | 2.561 | 0.000 |
| triQ2A4M3IQ2A4M3_FRATf- Outer membrane protein   E.WIEVVDNKDGSVAGNKK.E        | WIEVVDNKDGSVG    | 178 | 66 | 3.228 | 0.000 |
| triQ2A4M3IQ2A4M3_FRATf- Outer membrane protein   K.DGSVWAGNKK.E               | DGSVW            | 178 | 67 | 3.095 | 0.002 |
| triQ2A4M3IQ2A4M3_FRATf- Outer membrane protein   E.VVDNKDGSVWAGNKK.E          | VVDNKDGSVW       | 178 | 67 | 4.265 | 0.000 |
| triQ2A4M3IQ2A4M3_FRATf- Outer membrane protein   E.WIEVVDNKDGSVWAGNKK.E       | WIEVVDNKDGSVW    | 178 | 67 | 2.292 | 0.000 |
| triQ2A4M3IQ2A4M3_FRATf- Outer membrane protein   K.DGSVWVAGNKK.E              | DGSVWV           | 178 | 68 | 4.212 | 0.002 |
| triQ2A4M3IQ2A4M3_FRATf- Outer membrane protein   E.VVDNKDGSVWVAGNKK.E         | VVDNKDGSVWV      | 178 | 68 | 4.249 | 0.002 |
| triQ2A4M3IQ2A4M3_FRATf- Outer membrane protein   E.VVDNKDGSVWVWAGNKK.E        | VVDNKDGSVWVW     | 178 | 69 | 4.232 | 0.001 |
| triQ2A4M3IQ2A4M3_FRATf- Outer membrane protein   E.WIEVVDNKDGSVWVWAGNKK.E     | WIEVVDNKDGSVWVW  | 178 | 69 | 2.481 | 0.001 |
| triQ2A4M3IQ2A4M3_FRATf- Outer membrane protein   E.VVDNKDGSVWVWQAGNKK.E       | VVDNKDGSVWVWQ    | 178 | 70 | 4.105 | 0.001 |
| triQ2A4M3IQ2A4M3_FRATf- Outer membrane protein   E.WIEVVDNKDGSVWVWQAGNKK.E    | WIEVVDNKDGSVWVWQ | 178 | 70 | 2.917 | 0.000 |
| triQ2A4M3IQ2A4M3_FRATf- Outer membrane protein   K.TSQAIKAGNKK                | TSQAIK           | 178 | 82 | 3.003 | 0.009 |
| triQ2A4M3IQ2A4M3_FRATf- Outer membrane protein   K.TSQAIKDPAGNKK.E            | TSQAIKDP         | 178 | 84 | 3.474 | 0.003 |
| triQ2A4M3IQ2A4M3_FRATf- Outer membrane protein   K.TSQAIKDPAGNKK.E            | TSQAIKDP         | 178 | 85 | 4.29  | 0.000 |
| triQ2A4M3IQ2A4M3_FRATf- Outer membrane protein   K.TSQAIKDPAGNKKENR.V         | TSQAIKDP         | 178 | 85 | 3.42  | 0.001 |
| triQ2A4M3IQ2A4M3_FRATf- Outer membrane protein   K.TSQAIKDPAGNKKENR.V         | TSQAIKDP         | 178 | 86 | 4.385 | 0.000 |
| triQ2A4M3IQ2A4M3_FRATf- Outer membrane protein   K.TSQAIKDPAGNKK.E            | TSQAIKDP         | 178 | 86 | 3.682 | 0.009 |
| triQ2A4M3IQ2A4M3_FRATf- Outer membrane protein   K.TSQAIKDPAGNKK.E            | TSQAIKDP         | 178 | 87 | 4.3   | 0.000 |
| triQ2A4M3IQ2A4M3_FRATf- Outer membrane protein   K.TSQAIKDPAGNKKENR.V         | TSQAIKDP         | 178 | 87 | 3.358 | 0.000 |
| triQ2A4M3IQ2A4M3_FRATf- Outer membrane protein   K.DPIEQMAGNKK.E              | DPIEQM           | 178 | 88 | 4.151 | 0.000 |
| triQ2A4M3IQ2A4M3_FRATf- Outer membrane protein   D.PIEQMAGNKK.E               | PIEQM            | 178 | 88 | 3.689 | 0.006 |
| triQ2A4M3IQ2A4M3_FRATf- Outer membrane protein   K.TSQAIKDPPIEQMAGNKK.E       | TSQAIKDPPIEQM    | 178 | 88 | 4.265 | 0.000 |
| triQ2A4M3IQ2A4M3_FRATf- Outer membrane protein   K.TSQAIKDPPIEQMAGNKK.E       | TSQAIKDPPIEQM    | 178 | 88 | 4.151 | 0.000 |
| triQ2A4M3IQ2A4M3_FRATf- Outer membrane protein   K.TSQAIKDPPIEQM+16AGNKK.E    | TSQAIKDPPIEQM    | 178 | 88 | 3.287 | 0.000 |
| triQ2A4M3IQ2A4M3_FRATf- Outer membrane protein   K.TSQAIKDPPIEQMAGNKKENR.V    | TSQAIKDPPIEQM    | 178 | 88 | 3.247 | 0.003 |
| triQ2A4M3IQ2A4M3_FRATf- Outer membrane protein   K.TSQAIKDPPIEQM+16AGNKKENR.V | TSQAIKDPPIEQM    | 178 | 88 | 2.5   | 0.000 |
| triQ2A4M3IQ2A4M3_FRATf- Outer membrane protein   K.TSQAIKDPPIEQMMAGNKK.E      | TSQAIKDPPIEQMM   | 178 | 89 | 4.16  | 0.000 |

**Table S2.** Junction peptides identified by MudPIT-LC-MS-MS analysis of *F. tularensis* tmRNA- tagged proteins.

|                                                                              |                  |     |     |       |       |
|------------------------------------------------------------------------------|------------------|-----|-----|-------|-------|
| triQ2A4M3IQ2A4M3_FRATf Outer membrane protein   K.TSQAISKDPIEQMMAAGNKK.E     | TSQAISKDPIEQMMA  | 178 | 90  | 4.371 | 0.000 |
| triQ2A4M3IQ2A4M3_FRATf Outer membrane protein   K.TSQAISKDPIEQMMAAGNKK.K     | TSQAISKDPIEQMMA  | 178 | 90  | 4.232 | 0.000 |
| triQ2A4M3IQ2A4M3_FRATf Outer membrane protein   K.TSQAISKDPIEQM+16MAAGNKK.E  | TSQAISKDPIEQMMA  | 178 | 90  | 3.628 | 0.000 |
| triQ2A4M3IQ2A4M3_FRATf Outer membrane protein   K.TSQAISKDPIEQMM+16AAGNKK.E  | TSQAISKDPIEQMMA  | 178 | 90  | 2.691 | 0.001 |
| triQ2A4M3IQ2A4M3_FRATf Outer membrane protein   K.TSQAISKDPIEQMMANAGNKK.E    | TSQAISKDPIEQMMAN | 178 | 91  | 3.77  | 0.000 |
| triQ2A4M3IQ2A4M3_FRATf Outer membrane protein   K.TSQAISKDPIEQM+16MANAGNKK.E | TSQAISKDPIEQMMAN | 178 | 91  | 2.717 | 0.000 |
| triQ2A4M3IQ2A4M3_FRATf Outer membrane protein   K.TSQAISKDPIEQMMANAGNKK.K    | TSQAISKDPIEQMMAN | 178 | 91  | 2.068 | 0.001 |
| triQ2A4M3IQ2A4M3_FRATf Outer membrane protein   K.DPIEQMMANFAGNKK.K          | DPIEQMMANF       | 178 | 92  | 3.56  | 0.009 |
| triQ2A4M3IQ2A4M3_FRATf Outer membrane protein   K.QQQLLDQHAGNKKENR.V         | QQQLLDQH         | 178 | 102 | 3.325 | 0.005 |
| triQ2A4M3IQ2A4M3_FRATf Outer membrane protein   K.QQQLLDQHAGNKK.E            | QQQLLDQH         | 178 | 102 | 3.231 | 0.000 |
| triQ2A4M3IQ2A4M3_FRATf Outer membrane protein   K.QQQLLDQHAGNKK.K            | QQQLLDQH         | 178 | 102 | 2.652 | 0.009 |
| triQ2A4M3IQ2A4M3_FRATf Outer membrane protein   *.KQQQLLDQHFAGNKK.K          | KQQQLLDQHF       | 178 | 103 | 3.612 | 0.009 |
| triQ2A4M3IQ2A4M3_FRATf Outer membrane protein   K.QQQLLDQHFAGNKK.E           | QQQLLDQHF        | 178 | 103 | 3.427 | 0.000 |
| triQ2A4M3IQ2A4M3_FRATf Outer membrane protein   K.QQQLLDQHFAGNKK.E           | QQQLLDQHF        | 178 | 103 | 3.376 | 0.000 |
| triQ2A4M3IQ2A4M3_FRATf Outer membrane protein   K.QQQLLDQHFAGNKK.K           | QQQLLDQHF        | 178 | 103 | 2.962 | 0.002 |
| triQ2A4M3IQ2A4M3_FRATf Outer membrane protein   K.QQQLLDQHFAGNKKENR.V        | QQQLLDQHF        | 178 | 103 | 2.126 | 0.004 |
| triQ2A4M3IQ2A4M3_FRATf Outer membrane protein   K.QQQLLDQHFAGNKK.E           | QQQLLDQHF        | 178 | 104 | 3.432 | 0.003 |
| triQ2A4M3IQ2A4M3_FRATf Outer membrane protein   K.MLANIDQAGNKK.K             | MLANIDQ          | 178 | 112 | 3.724 | 0.009 |
| triQ2A4M3IQ2A4M3_FRATf Outer membrane protein   K.M+16LANIDQAGNKK.E          | MLANIDQ          | 178 | 112 | 3.39  | 0.006 |
| triQ2A4M3IQ2A4M3_FRATf Outer membrane protein   K.M+16LANIDQAGNKK.K          | MLANIDQ          | 178 | 112 | 3.286 | 0.002 |
| triQ2A4M3IQ2A4M3_FRATf Outer membrane protein   K.MLANIDQAGNKK.K             | MLANIDQN         | 178 | 113 | 4.154 | 0.000 |
| triQ2A4M3IQ2A4M3_FRATf Outer membrane protein   K.MLANIDQAGNKK.E             | MLANIDQN         | 178 | 113 | 4.088 | 0.000 |
| triQ2A4M3IQ2A4M3_FRATf Outer membrane protein   K.M+16LANIDQAGNKK.E          | MLANIDQN         | 178 | 113 | 3.496 | 0.002 |
| triQ2A4M3IQ2A4M3_FRATf Outer membrane protein   K.MLANIDQAGNKKENR.V          | MLANIDQN         | 178 | 113 | 3.145 | 0.002 |
| triQ2A4M3IQ2A4M3_FRATf Outer membrane protein   K.M+16LANIDQAGNKKENR.V       | MLANIDQN         | 178 | 113 | 2.3   | 0.003 |
| triQ2A4M3IQ2A4M3_FRATf Outer membrane protein   K.MLANIDQAGNKK.E             | MLANIDQNI        | 178 | 114 | 4.231 | 0.000 |
| triQ2A4M3IQ2A4M3_FRATf Outer membrane protein   K.MLANIDQAGNKK.K             | MLANIDQNI        | 178 | 114 | 3.985 | 0.002 |
| triQ2A4M3IQ2A4M3_FRATf Outer membrane protein   K.M+16LANIDQAGNKK.K          | MLANIDQNI        | 178 | 114 | 3.939 | 0.003 |
| triQ2A4M3IQ2A4M3_FRATf Outer membrane protein   K.M+16LANIDQAGNKK.E          | MLANIDQNI        | 178 | 114 | 3.649 | 0.002 |
| triQ2A4M3IQ2A4M3_FRATf Outer membrane protein   K.MLANIDQAGNKK.E             | MLANIDQNI        | 178 | 115 | 4.061 | 0.009 |
| triQ2A4M3IQ2A4M3_FRATf Outer membrane protein   K.MLANIDQAGNKK.E             | MLANIDQNI        | 178 | 116 | 4.181 | 0.000 |
| triQ2A4M3IQ2A4M3_FRATf Outer membrane protein   K.M+16LANIDQAGNKK.E          | MLANIDQNI        | 178 | 116 | 3.704 | 0.001 |
| triQ2A4M3IQ2A4M3_FRATf Outer membrane protein   K.MLANIDQAGNKK.E             | MLANIDQNI        | 178 | 118 | 4.277 | 0.001 |

**Table S2.** Junction peptides identified by MudPIT-LC-MS-MS analysis of *F. tularensis* tmRNA- tagged proteins.

|                                                                                |                    |     |     |       |       |
|--------------------------------------------------------------------------------|--------------------|-----|-----|-------|-------|
| triQ2A4M3IQ2A4M3_FRATf Outer membrane protein   K.M+16LANIDQNIQMAGNKK.E        | MLANIDQNIQM        | 178 | 118 | 3.589 | 0.008 |
| triQ2A4M3IQ2A4M3_FRATf Outer membrane protein   K.MLANIDQNIQMAGNKKENR.V        | MLANIDQNIQM        | 178 | 118 | 3.406 | 0.000 |
| triQ2A4M3IQ2A4M3_FRATf Outer membrane protein   K.MLANIDQNIQM+16QAGNKK.E       | MLANIDQNIQM        | 178 | 118 | 3.382 | 0.001 |
| triQ2A4M3IQ2A4M3_FRATf Outer membrane protein   K.M+16LANIDQNIQM+16QAGNKK.E    | MLANIDQNIQM        | 178 | 118 | 2.28  | 0.001 |
| triQ2A4M3IQ2A4M3_FRATf Outer membrane protein   K.MLANIDQNIQMQAAGNKK.E         | MLANIDQNIQMQAQ     | 178 | 120 | 4.219 | 0.001 |
| triQ2A4M3IQ2A4M3_FRATf Outer membrane protein   K.MLANIDQNIQM+16QAQAGNKK.E     | MLANIDQNIQMQAQ     | 178 | 120 | 2.989 | 0.010 |
| triQ2A4M3IQ2A4M3_FRATf Outer membrane protein   K.MLANIDQNIQMQAQAGNKK.K        | MLANIDQNIQMQAQP    | 178 | 121 | 4.287 | 0.000 |
| triQ2A4M3IQ2A4M3_FRATf Outer membrane protein   K.MLANIDQNIQMQAQAGNKK.E        | MLANIDQNIQMQAQP    | 178 | 121 | 4.227 | 0.000 |
| triQ2A4M3IQ2A4M3_FRATf Outer membrane protein   K.MLANIDQNIQM+16QAQAGNKK.K     | MLANIDQNIQMQAQP    | 178 | 121 | 3.997 | 0.000 |
| triQ2A4M3IQ2A4M3_FRATf Outer membrane protein   K.MLANIDQNIQM+16QAQAGNKK.E     | MLANIDQNIQMQAQP    | 178 | 121 | 3.561 | 0.000 |
| triQ2A4M3IQ2A4M3_FRATf Outer membrane protein   K.M+16LANIDQNIQMQAQAGNKK.E     | MLANIDQNIQMQAQP    | 178 | 121 | 3.535 | 0.000 |
| triQ2A4M3IQ2A4M3_FRATf Outer membrane protein   K.M+16LANIDQNIQM+16QAQAGNKK.E  | MLANIDQNIQMQAQP    | 178 | 121 | 3.109 | 0.003 |
| triQ2A4M3IQ2A4M3_FRATf Outer membrane protein   K.M+16LANIDQNIQM+16QAQAGNKK.K  | MLANIDQNIQMQAQP    | 178 | 121 | 2.921 | 0.000 |
| triQ2A4M3IQ2A4M3_FRATf Outer membrane protein   K.MLANIDQNIQMQAQPNAGNKK.K      | MLANIDQNIQMQAQPN   | 178 | 122 | 4.352 | 0.000 |
| triQ2A4M3IQ2A4M3_FRATf Outer membrane protein   K.MLANIDQNIQM+16QAQPNAGNKK.K   | MLANIDQNIQMQAQPN   | 178 | 122 | 4.123 | 0.000 |
| triQ2A4M3IQ2A4M3_FRATf Outer membrane protein   K.MLANIDQNIQMQAQPNAGNKK.E      | MLANIDQNIQMQAQPN   | 178 | 122 | 4.113 | 0.000 |
| triQ2A4M3IQ2A4M3_FRATf Outer membrane protein   K.M+16LANIDQNIQMQAQPNAGNKK.K   | MLANIDQNIQMQAQPN   | 178 | 122 | 3.86  | 0.000 |
| triQ2A4M3IQ2A4M3_FRATf Outer membrane protein   K.MLANIDQNIQMQAQPNAGNKKENR.V   | MLANIDQNIQMQAQPN   | 178 | 122 | 3.367 | 0.000 |
| triQ2A4M3IQ2A4M3_FRATf Outer membrane protein   K.MLANIDQNIQM+16QAQPNAGNKK.E   | MLANIDQNIQMQAQPN   | 178 | 122 | 3.263 | 0.007 |
| triQ2A4M3IQ2A4M3_FRATf Outer membrane protein   K.M+16LANIDQNIQMQAQPNAGNKK.E   | MLANIDQNIQMQAQPN   | 178 | 122 | 3.154 | 0.003 |
| triQ2A4M3IQ2A4M3_FRATf Outer membrane protein   K.MLANIDQNIQMQAQPNASAGNKK.K    | MLANIDQNIQMQAQPNS  | 178 | 123 | 4.346 | 0.001 |
| triQ2A4M3IQ2A4M3_FRATf Outer membrane protein   K.MLANIDQNIQM+16QAQPNASAGNKK.K | MLANIDQNIQMQAQPNS  | 178 | 123 | 3.913 | 0.000 |
| triQ2A4M3IQ2A4M3_FRATf Outer membrane protein   K.MLANIDQNIQMQAQPNASAGNKK.E    | MLANIDQNIQMQAQPNS  | 178 | 123 | 3.79  | 0.008 |
| triQ2A4M3IQ2A4M3_FRATf Outer membrane protein   K.MLANIDQNIQM+16QAQPNASAGNKK.E | MLANIDQNIQMQAQPNS  | 178 | 123 | 3.504 | 0.004 |
| triQ2A4M3IQ2A4M3_FRATf Outer membrane protein   K.M+16LANIDQNIQMQAQPNASAGNKK.E | MLANIDQNIQMQAQPNS  | 178 | 123 | 3.161 | 0.001 |
| triQ2A4M3IQ2A4M3_FRATf Outer membrane protein   K.MLANIDQNIQMQAQPNSTAGNKKENR.V | MLANIDQNIQMQAQPNST | 178 | 124 | 3.548 | 0.000 |
| triQ2A4M3IQ2A4M3_FRATf Outer membrane protein   K.AKNNPQVAGNKK.K               | AKNNPQV            | 178 | 132 | 4.044 | 0.006 |
| triQ2A4M3IQ2A4M3_FRATf Outer membrane protein   K.AKNNPQVAGNKK.E               | AKNNPQV            | 178 | 132 | 3.852 | 0.009 |
| triQ2A4M3IQ2A4M3_FRATf Outer membrane protein   K.AKNNPQVAGNKK.E.N             | AKNNPQV            | 178 | 132 | 3.227 | 0.000 |
| triQ2A4M3IQ2A4M3_FRATf Outer membrane protein   K.NNPQVAGNKK.E                 | NNPQV              | 178 | 132 | 3.824 | 0.008 |
| triQ2A4M3IQ2A4M3_FRATf Outer membrane protein   K.AKNNPQVLAGNKK.E.N            | AKNNPQVL           | 178 | 133 | 3.718 | 0.000 |
| triQ2A4M3IQ2A4M3_FRATf Outer membrane protein   K.AKNNPQVLAGNKKENR.V           | AKNNPQVL           | 178 | 133 | 2.49  | 0.001 |
| triQ2A4M3IQ2A4M3_FRATf Outer membrane protein   K.AKNNPQVLAGNKK.E              | AKNNPQVL           | 178 | 133 | 2.435 | 0.009 |

**Table S2.** Junction peptides identified by MudPIT-LC-MS-MS analysis of *F. tularensis* tmRNA- tagged proteins.

|                        |                                                  |              |     |     |       |       |
|------------------------|--------------------------------------------------|--------------|-----|-----|-------|-------|
| triQ2A4M3IQ2A4M3_FRAT+ | Outer membrane protein   K.NNPQVLKAGNKKE.N       | NNPQVLK      | 178 | 134 | 3.854 | 0.001 |
| triQ2A4M3IQ2A4M3_FRAT+ | Outer membrane protein   K.FSSITIAGNKK.E         | FSSITI       | 178 | 141 | 4.108 | 0.003 |
| triQ2A4M3IQ2A4M3_FRAT+ | Outer membrane protein   K.FSSITIAGNK.K          | FSSITI       | 178 | 141 | 2.708 | 0.003 |
| triQ2A4M3IQ2A4M3_FRAT+ | Outer membrane protein   K.KFSSITIAGNKK.E        | KFSSITI      | 178 | 141 | 4.167 | 0.000 |
| triQ2A4M3IQ2A4M3_FRAT+ | Outer membrane protein   K.KFSSITIAGNK.K         | KFSSITI      | 178 | 141 | 3.981 | 0.000 |
| triQ2A4M3IQ2A4M3_FRAT+ | Outer membrane protein   *.KFSSITINAGNKK.E       | KFSSITIN     | 178 | 142 | 4.17  | 0.000 |
| triQ2A4M3IQ2A4M3_FRAT+ | Outer membrane protein   *.KFSSITINAGNK.K        | KFSSITIN     | 178 | 142 | 4.06  | 0.000 |
| triQ2A4M3IQ2A4M3_FRAT+ | Outer membrane protein   K.FSSITINSAGNKK.E       | FSSITINS     | 178 | 143 | 4.036 | 0.000 |
| triQ2A4M3IQ2A4M3_FRAT+ | Outer membrane protein   K.FSSITINSAGNK.K        | FSSITINS     | 178 | 143 | 4.01  | 0.001 |
| triQ2A4M3IQ2A4M3_FRAT+ | Outer membrane protein   *.KFSSITINSAGNK.K       | KFSSITINS    | 178 | 143 | 4.229 | 0.000 |
| triQ2A4M3IQ2A4M3_FRAT+ | Outer membrane protein   *.KFSSITINSAGNKK.E      | KFSSITINS    | 178 | 143 | 4.224 | 0.000 |
| triQ2A4M3IQ2A4M3_FRAT+ | Outer membrane protein   K.FSSITINSDAGNKK.E      | FSSITINS     | 178 | 144 | 4.112 | 0.000 |
| triQ2A4M3IQ2A4M3_FRAT+ | Outer membrane protein   K.FSSITINSDAGNKKE.N     | FSSITINS     | 178 | 144 | 2.805 | 0.000 |
| triQ2A4M3IQ2A4M3_FRAT+ | Outer membrane protein   *.KFSSITINSDAGNKK.E     | KFSSITINS    | 178 | 144 | 4.303 | 0.000 |
| triQ2A4M3IQ2A4M3_FRAT+ | Outer membrane protein   *.KFSSITINSDAGNK.K      | KFSSITINS    | 178 | 144 | 4.115 | 0.000 |
| triQ2A4M3IQ2A4M3_FRAT+ | Outer membrane protein   *.KFSSITINSDAGNKKENR.V  | KFSSITINS    | 178 | 144 | 3.543 | 0.000 |
| triQ2A4M3IQ2A4M3_FRAT+ | Outer membrane protein   K.FSSITINSDGAGNKK.E     | FSSITINS     | 178 | 145 | 3.981 | 0.002 |
| triQ2A4M3IQ2A4M3_FRAT+ | Outer membrane protein   K.FSSITINSDGAGNKKENR.V  | FSSITINS     | 178 | 145 | 2.048 | 0.002 |
| triQ2A4M3IQ2A4M3_FRAT+ | Outer membrane protein   *.KFSSITINSDGAGNKKENR.V | KFSSITINS    | 178 | 145 | 4.272 | 0.001 |
| triQ2A4M3IQ2A4M3_FRAT+ | Outer membrane protein   *.KFSSITINSDGAGNKK.E    | KFSSITINS    | 178 | 145 | 3.998 | 0.006 |
| triQ2A4M3IQ2A4M3_FRAT+ | Outer membrane protein   *.KFSSITINSDGAGNKKE.N   | KFSSITINS    | 178 | 145 | 3.978 | 0.000 |
| triQ2A4M3IQ2A4M3_FRAT+ | Outer membrane protein   K.IVKKTEDGNGAGNKKENR.V  | IVKKTEDGNG   | 178 | 159 | 2.479 | 0.004 |
| triQ2A4M3IQ2A4M3_FRAT+ | Outer membrane protein   K.KTEDGNGNIAGNKK.E      | KTEDGNGNI    | 178 | 161 | 3.673 | 0.005 |
| triQ2A4M3IQ2A4M3_FRAT+ | Outer membrane protein   K.KTEDGNGNIAGNK.K       | KTEDGNGNI    | 178 | 161 | 3.081 | 0.008 |
| triQ2A4M3IQ2A4M3_FRAT+ | Outer membrane protein   K.KTEDGNGNIQAGNKK.E     | KTEDGNGNIQ   | 178 | 162 | 4.068 | 0.006 |
| triQ2A4M3IQ2A4M3_FRAT+ | Outer membrane protein   K.KTEDGNGNIQTAGNKK.E    | KTEDGNGNIQT  | 178 | 163 | 3.648 | 0.000 |
| triQ2A4M3IQ2A4M3_FRAT+ | Outer membrane protein   K.KTEDGNGNIQTVAGNKK.E   | KTEDGNGNIQTV | 178 | 164 | 4.106 | 0.002 |
| triQ2A4M3IQ2A4M3_FRAT+ | Outer membrane protein   K.KTEDGNGNIQTVAGNK.K    | KTEDGNGNIQTV | 178 | 164 | 3.177 | 0.003 |
| triQ2A4M3IQ2A4M3_FRAT+ | Outer membrane protein   K.EIPADQAGNKK.E         | EIPADQ       | 178 | 172 | 3.335 | 0.000 |
| triQ2A4M3IQ2A4M3_FRAT+ | Outer membrane protein   K.EIPADQLAGNKK.E        | EIPADQL      | 178 | 173 | 3.963 | 0.000 |
| triQ2A4M3IQ2A4M3_FRAT+ | Outer membrane protein   E.IPADQLAGNKKE.N        | IPADQL       | 178 | 173 | 4.078 | 0.000 |
| triQ2A4M3IQ2A4M3_FRAT+ | Outer membrane protein   E.IPADQLAGNKK.E         | IPADQL       | 178 | 173 | 3.146 | 0.000 |
| triQ2A4M3IQ2A4M3_FRAT+ | Outer membrane protein   E.KEIPADQLAGNKKE.N      | KEIPADQL     | 178 | 173 | 4.23  | 0.000 |

**Table S2.** Junction peptides identified by MudPIT-LC-MS-MS analysis of *F. tularensis* tmRNA- tagged proteins.

|                                                                              |                          |                 |     |       |       |       |
|------------------------------------------------------------------------------|--------------------------|-----------------|-----|-------|-------|-------|
| triQ2A4M3IQ2A4M3_FRATH Outer membrane protein   E.KEIPADQLAGNKK.E            | KEIPADQL                 | 178             | 173 | 3.768 | 0.004 |       |
| triQ2A4M3IQ2A4M3_FRATH Outer membrane protein   *.EIPADQLGAGNKK.E            | EIPADQLG                 | 178             | 174 | 3.658 | 0.000 |       |
| triQ2A4M3IQ2A4M3_FRATH Outer membrane protein   E.IPADQLGAGNKK.E             | IPADQLG                  | 178             | 174 | 4.04  | 0.001 |       |
| triQ2A4M3IQ2A4M3_FRATH Outer membrane protein   E.KEIPADQLGAGNKK.E           | KEIPADQLG                | 178             | 174 | 4.269 | 0.000 |       |
| triQ2A4M3IQ2A4M3_FRATH Outer membrane protein   E.KEIPADQLGAGNKK.K           | KEIPADQLG                | 178             | 174 | 3.933 | 0.000 |       |
| triQ2A4M3IQ2A4M3_FRATH Outer membrane protein   *.EIPADQLGTAGNKK.E           | EIPADQLGT                | 178             | 175 | 2.548 | 0.001 |       |
| triQ2A4M3IQ2A4M3_FRATH Outer membrane protein   E.IPADQLGTAGNKK.E            | IPADQLGT                 | 178             | 175 | 4.252 | 0.000 |       |
| triQ2A4M3IQ2A4M3_FRATH Outer membrane protein   E.IPADQLGTAGNKK.E            | IPADQLGT                 | 178             | 175 | 3.852 | 0.000 |       |
| triQ2A4M3IQ2A4M3_FRATH Outer membrane protein   E.KEIPADQLGTAGNKK.E          | KEIPADQLGT               | 178             | 175 | 4.057 | 0.000 |       |
| triQ2A4M3IQ2A4M3_FRATH Outer membrane protein   *.EIPADQLGTIAGNKK.E          | EIPADQLGTI               | 178             | 176 | 4.072 | 0.004 |       |
| triQ2A4M3IQ2A4M3_FRATH Outer membrane protein   E.IPADQLGTIAGNKK.E           | IPADQLGTI                | 178             | 176 | 4.314 | 0.002 |       |
| triQ2A4M3IQ2A4M3_FRATH Outer membrane protein   E.IPADQLGTIAGNKK.E           | IPADQLGTI                | 178             | 176 | 4.216 | 0.009 |       |
| triQ2A4M3IQ2A4M3_FRATH Outer membrane protein   E.KEIPADQLGTIAGNKK.E         | KEIPADQLGTI              | 178             | 176 | 4.302 | 0.000 |       |
| triQ2A4M3IQ2A4M3_FRATH Outer membrane protein   E.IPADQLGTIKAGNKK.E          | IPADQLGTIK               | 178             | 177 | 4.149 | 0.005 |       |
| triQ2A4M3IQ2A4M3_FRATH Outer membrane protein   E.KEIPADQLGTIKAGNKK.E        | KEIPADQLGTIK             | 178             | 177 | 4.044 | 0.000 |       |
| triQ2A4M3IQ2A4M3_FRATH Outer membrane protein   E.IPADQLGTIKLAGNKK.E         | IPADQLGTIKL              | 178             | 178 | 4.338 | 0.001 |       |
| triQ2A4M3IQ2A4M3_FRATH Outer membrane protein   E.KEIPADQLGTIKLAGNKK.E       | KEIPADQLGTIKL            | 178             | 178 | 3.263 | 0.001 |       |
| triQ2A4M9IQ2A4M9_FRATH Delta 9 acyl-lipid fatty aci                          | E.TSGLAFVFWGGILSTAGNKK.K | TSGLAFVFWGGILST | 212 | 123   | 2.387 | 0.008 |
| triQ2A4N4IQ2A4N4_FRATH Two-component response                                | E.LALLAILVQNAGAGNKK.K    | LALLAILVQNAG    | 228 | 170   | 3.158 | 0.000 |
| triQ2A4N4IQ2A4N4_FRATH Two-component response                                | K.INIPNFIQTIAGNKK.K      | INIPNFIQTI      | 228 | 214   | 3.553 | 0.000 |
| triQ2A4N4IQ2A4N4_FRATH Two-component response                                | R.GVGYFVQAGNKK.E         | GVGYFVQ         | 228 | 222   | 4.086 | 0.003 |
| triQ2A4P7IQ2A4P7_FRATH Outer membrane protein   K.IAVVNPVEIFNDSDLGSGVAGNKK.K | IAVVNPVEIFNDSDLGSGV      | 167             | 41  | 4.309 | 0.000 |       |
| triQ2A4P7IQ2A4P7_FRATH Outer membrane protein   K.KLENDLKAGNKK.E             | KLENDLK                  | 167             | 51  | 3.791 | 0.001 |       |
| triQ2A4P7IQ2A4P7_FRATH Outer membrane protein   K.KLENDLKPAGNKK.E            | KLENDLKP                 | 167             | 52  | 4.023 | 0.000 |       |
| triQ2A4P7IQ2A4P7_FRATH Outer membrane protein   E.NDLKPAGNKKENR.V            | NDLKP                    | 167             | 52  | 2.965 | 0.000 |       |
| triQ2A4P7IQ2A4P7_FRATH Outer membrane protein   E.NDLKPAGNKK.E               | NDLKP                    | 167             | 52  | 2.143 | 0.008 |       |
| triQ2A4P7IQ2A4P7_FRATH Outer membrane protein   K.KLENDLKPDAAGNKK.E          | KLENDLKPDA               | 167             | 53  | 4.204 | 0.000 |       |
| triQ2A4P7IQ2A4P7_FRATH Outer membrane protein   K.KLENDLKPDAAGNKKENR.V       | KLENDLKPDA               | 167             | 53  | 3.148 | 0.003 |       |
| triQ2A4P7IQ2A4P7_FRATH Outer membrane protein   K.KLENDLKPDAAGNKK.E          | KLENDLKPDA               | 167             | 54  | 4.199 | 0.000 |       |
| triQ2A4P7IQ2A4P7_FRATH Outer membrane protein   E.NDLKPDAAGNKK.E             | NDLKPDA                  | 167             | 54  | 3.58  | 0.000 |       |
| triQ2A4P7IQ2A4P7_FRATH Outer membrane protein   K.KLENDLKPDATAAGNKK.E        | KLENDLKPDATA             | 167             | 55  | 4.141 | 0.003 |       |
| triQ2A4P7IQ2A4P7_FRATH Outer membrane protein   E.NDLKPDATAAGNKK.E           | NDLKPDATA                | 167             | 55  | 3.828 | 0.005 |       |
| triQ2A4P7IQ2A4P7_FRATH Outer membrane protein   E.NDLKPDATAAGNKK.E           | NDLKPDATA                | 167             | 55  | 3.619 | 0.003 |       |

**Table S2.** Junction peptides identified by MudPIT-LC-MS-MS analysis of *F. tularensis* tmRNA- tagged proteins.

|                                                                              |                    |     |     |       |       |
|------------------------------------------------------------------------------|--------------------|-----|-----|-------|-------|
| triQ2A4P7IQ2A4P7_FRATH Outer membrane protein   E.NDLKPDATAGNKKENR.V         | NDLKPDAT           | 167 | 55  | 3.552 | 0.001 |
| triQ2A4P7IQ2A4P7_FRATH Outer membrane protein   E.NDLKPDATKAGNKKKE.N         | NDLKPDATK          | 167 | 56  | 4.281 | 0.000 |
| triQ2A4P7IQ2A4P7_FRATH Outer membrane protein   E.NDLKPDATKAGNKKENR.V        | NDLKPDATK          | 167 | 56  | 2.924 | 0.008 |
| triQ2A4P7IQ2A4P7_FRATH Outer membrane protein   E.NDLKPDATKLAGNKKKE.N        | NDLKPDATKL         | 167 | 57  | 4.102 | 0.000 |
| triQ2A4P7IQ2A4P7_FRATH Outer membrane protein   E.NDLKPDATKLAGNKKKE.N        | NDLKPDATKLK        | 167 | 58  | 3.992 | 0.001 |
| triQ2A4P7IQ2A4P7_FRATH Outer membrane protein   K.LKQEQQDAGNKKENR.V          | LKQEQQD            | 167 | 62  | 3.663 | 0.001 |
| triQ2A4P7IQ2A4P7_FRATH Outer membrane protein   K.LKQEQQDAGNK.K              | LKQEQQD            | 167 | 62  | 2.942 | 0.005 |
| triQ2A4P7IQ2A4P7_FRATH Outer membrane protein   E.NDLKPDATKLKQEQQDAGNKKKE.N  | NDLKPDATKLKQEQQD   | 167 | 62  | 3.411 | 0.003 |
| triQ2A4P7IQ2A4P7_FRATH Outer membrane protein   E.NDLKPDATKLKQEQQDAGNKKENR.V | NDLKPDATKLKQEQQD   | 167 | 62  | 3.062 | 0.000 |
| triQ2A4P7IQ2A4P7_FRATH Outer membrane protein   K.LKQEQQDNIAGNKK.E           | LKQEQQDNI          | 167 | 64  | 3.706 | 0.005 |
| triQ2A4P7IQ2A4P7_FRATH Outer membrane protein   K.LKQEQQDNIAGNKKENR.V        | LKQEQQDNI          | 167 | 64  | 3.669 | 0.001 |
| triQ2A4P7IQ2A4P7_FRATH Outer membrane protein   K.LKQEQQDNIMAGNKK.E          | LKQEQQDNIM         | 167 | 65  | 3.903 | 0.006 |
| triQ2A4P7IQ2A4P7_FRATH Outer membrane protein   K.LKQEQQDNIMAGNK.K           | LKQEQQDNIM         | 167 | 65  | 2.875 | 0.003 |
| triQ2A4P7IQ2A4P7_FRATH Outer membrane protein   K.LKQEQQDNIMQAGNKK.E         | LKQEQQDNIMQ        | 167 | 66  | 4.104 | 0.008 |
| triQ2A4P7IQ2A4P7_FRATH Outer membrane protein   K.LKQEQQDNIMQQAGNKK.E        | LKQEQQDNIMQQ       | 167 | 67  | 4.101 | 0.000 |
| triQ2A4P7IQ2A4P7_FRATH Outer membrane protein   K.LKQEQQDNIM+16QQAGNKK.E     | LKQEQQDNIMQQ       | 167 | 67  | 3.178 | 0.005 |
| triQ2A4P7IQ2A4P7_FRATH Outer membrane protein   K.TLQNNSAAGNKK.E             | TLQNNSA            | 167 | 76  | 3.632 | 0.000 |
| triQ2A4P7IQ2A4P7_FRATH Outer membrane protein   K.TLQNNSATAGNKK.E            | TLQNNSAT           | 167 | 77  | 3.352 | 0.000 |
| triQ2A4P7IQ2A4P7_FRATH Outer membrane protein   K.TLQNNSATAGNK.K             | TLQNNSAT           | 167 | 77  | 2.574 | 0.002 |
| triQ2A4P7IQ2A4P7_FRATH Outer membrane protein   K.TLQNNSATMTKAGNK.K          | TLQNNSATMTK        | 167 | 80  | 3.386 | 0.000 |
| triQ2A4P7IQ2A4P7_FRATH Outer membrane protein   E.LDKKQQQIQAGNKKKE.N         | LDKKQQQIQ          | 167 | 91  | 3.816 | 0.000 |
| triQ2A4P7IQ2A4P7_FRATH Outer membrane protein   E.LDKKQQQIQAGNKKKE.N         | LDKKQQQIQ          | 167 | 92  | 3.684 | 0.000 |
| triQ2A4P7IQ2A4P7_FRATH Outer membrane protein   K.KQQQIQQEQQAGNKK.E          | KQQQIQQEQQ         | 167 | 95  | 3.006 | 0.002 |
| triQ2A4P7IQ2A4P7_FRATH Outer membrane protein   K.SELDKKQQQIQQEQQAGNK.K      | SELDKKQQQIQQEQQ    | 167 | 95  | 2.495 | 0.004 |
| triQ2A4P7IQ2A4P7_FRATH Outer membrane protein   K.SELDKKQQQIQQEQQNFAAGNKK.E  | SELDKKQQQIQQEQQNFA | 167 | 98  | 2.941 | 0.000 |
| triQ2A4P7IQ2A4P7_FRATH Outer membrane protein   E.YTAKDKLAGNKKKE.N           | YTAKDKL            | 167 | 115 | 4.015 | 0.002 |
| triQ2A4P7IQ2A4P7_FRATH Outer membrane protein   E.YTAKDKLSKAGNKKKE.N         | YTAKDKLSK          | 167 | 117 | 4.205 | 0.005 |
| triQ2A4P7IQ2A4P7_FRATH Outer membrane protein   E.YTAKDKLSKAGNKKENR.V        | YTAKDKLSK          | 167 | 117 | 2.884 | 0.000 |
| triQ2A4P7IQ2A4P7_FRATH Outer membrane protein   *.KFQASFDKAGNK.K             | KFQASFDK           | 167 | 125 | 3.847 | 0.001 |
| triQ2A4P7IQ2A4P7_FRATH Outer membrane protein   K.NYNVVLTAGNKK.E             | NYNVVL             | 167 | 141 | 3.924 | 0.000 |
| triQ2A4P7IQ2A4P7_FRATH Outer membrane protein   K.NYNVVLTTAGNK.K             | NYNVVLTTQ          | 167 | 143 | 3.944 | 0.000 |
| triQ2A4P7IQ2A4P7_FRATH Outer membrane protein   K.NYNVVLTTQAAGNKK.E          | NYNVVLTTQA         | 167 | 144 | 4.107 | 0.000 |
| triQ2A4P7IQ2A4P7_FRATH Outer membrane protein   E.LMNKDSEAGNKK.E             | LMNKDSE            | 167 | 167 | 3.814 | 0.000 |

**Table S2.** Junction peptides identified by MudPIT-LC-MS-MS analysis of *F. tularensis* tmRNA- tagged proteins.

|                                                                                  |                       |     |     |       |       |
|----------------------------------------------------------------------------------|-----------------------|-----|-----|-------|-------|
| triQ2A4P7IQ2A4P7_FRATH Outer membrane protein   E.LMNKDSEAGNKK.E.N               | LMNKDSE               | 167 | 167 | 3.342 | 0.000 |
| triQ2A4P8IQ2A4P8_FRATH Outer membrane protein   K.ERPIIAGAGNKK.E.N               | ERPIIAG               | 792 | 100 | 2.972 | 0.006 |
| triQ2A4Q7IQ2A4Q7_FRATH Transposase isftu1 D.FRDIVINKAGNKK.E.N                    | FRDIVINK              | 239 | 15  | 2.723 | 0.009 |
| triQ2A4Q9IQ2A4Q9_FRATH ATP-dependent DNA helic E.FADM+16LDKHAGNKK.E              | FADMLDKH              | 679 | 657 | 3.58  | 0.002 |
| triQ2A4Q9IQ2A4Q9_FRATH ATP-dependent DNA helic E.FADM+16LDKHAGNKK.K              | FADMLDKH              | 679 | 657 | 2.98  | 0.005 |
| triQ2A4Q9IQ2A4Q9_FRATH ATP-dependent DNA helic E.FADM+16LDKHYPEAGNKK.K           | FADMLDKHYPE           | 679 | 660 | 2.42  | 0.002 |
| triQ2A4T3IQ2A4T3_FRATH Spermidine synthase FTL_*MIANINNKKIAGNKK.K                | MIANINNKKI            | 289 | 10  | 2.811 | 0.004 |
| triQ2A4U2IQ2A4U2_FRATH 4-alpha-glucanotransferase D.LPIYAGNKK.E                  | LPIY                  | 487 | 214 | 3.538 | 0.002 |
| triQ2A4U9IQ2A4U9_FRATH Shikimate 5-dehydrogenase E.EDIIEAWGLAGNKK.E              | EDIIEAWGL             | 281 | 281 | 3.153 | 0.008 |
| triQ2A4V2IQ2A4V2_FRATH Glycine cleavage system I D.AYAKTLAGNKK.E.N               | AYAKTL                | 127 | 125 | 3.839 | 0.000 |
| triQ2A4W8IQ2A4W8_FRATH DNA topoisomerase IV su K.FIPYDKDLKMLAAGNKK.K             | FIPYDKDLKMLA          | 741 | 645 | 2.733 | 0.006 |
| triQ2A4X1IQ2A4X1_FRATH Methionine aminopeptidase K.GIEVVKPGNHFGDIGAAGNKK.E       | GIEVVKPGNHFGDIGA      | 256 | 151 | 2.612 | 0.000 |
| triQ2A4X3IQ2A4X3_FRATH Cold shock protein FTL_0 R.KGPEAINIEVAGNKK.K              | KGPEAINIEV            | 67  | 66  | 4.122 | 0.000 |
| triQ2A4X3IQ2A4X3_FRATH Cold shock protein FTL_0 R.KGPEAINIEVLAGNKK.E             | KGPEAINIEVL           | 67  | 67  | 3.018 | 0.003 |
| triQ2A4Z1IQ2A4Z1_FRATH Putative uncharacterized E.LLLKLQQVQQLQGAGNKK.K           | LLLKLQQVQQLQG         | 551 | 86  | 3.999 | 0.004 |
| triQ2A4Z1IQ2A4Z1_FRATH Putative uncharacterized E.ADAQAWFGSAVTKAQASAGQLAGNKK.E.N | ADAQAWFGSAVTKAQASAGQL | 551 | 255 | 3.307 | 0.000 |
| triQ2A4Z1IQ2A4Z1_FRATH Putative uncharacterized K.AQSAGQLAGNKK.E                 | AQSAGQL               | 551 | 255 | 2.933 | 0.002 |
| triQ2A4Z1IQ2A4Z1_FRATH Putative uncharacterized K.YRPSVGSFSGGGAGNKK.E            | YRPSVGSFSGGG          | 551 | 328 | 2.619 | 0.001 |
| triQ2A504IQ2A504_FRATH DNA topoisomerase I FTL E.PLKKPKDAGNKKENR.V               | PLKKPKD               | 764 | 682 | 2.409 | 0.000 |
| triQ2A510IQ2A510_FRATH Oligopeptidase A FTL_04 D.KLFSAGNKK.E                     | KLFS                  | 668 | 30  | 2.841 | 0.002 |
| triQ2A516IQ2A516_FRATH UDP-N-acetylglucosamine *QAMTYAAMAAGNKK.E                 | QAMTYAAMA             | 434 | 249 | 2.248 | 0.003 |
| triQ2A518IQ2A518_FRATH Putative uncharacterized K.KPTQC+57SDYAGNKK.E             | KPTQCSDY              | 291 | 278 | 2.669 | 0.000 |
| triQ2A543IQ2A543_FRATH Mannose-6-phosphate iso K.IITVKPQGQLSAGNKK.K              | IITVKPQGQLS           | 120 | 41  | 3.546 | 0.002 |
| triQ2A544IQ2A544_FRATH Amino acid permease FTL D.KFAAVFAFVAGNKK.E.N              | KFAAVFAFV             | 464 | 286 | 2.545 | 0.001 |
| triQ2A563IQ2A563_FRATH Putative uncharacterized E.YFLVLPEQYAGNKK.K               | YFLVLPEQY             | 168 | 168 | 2.512 | 0.005 |
| triQ2A565IQ2A565_FRATH Putative uncharacterized D.HCKIKAGNKK.E                   | HCKIK                 | 119 | 119 | 3.304 | 0.004 |
| triQ2A598IQ2A598_FRATH Dihydrolipoyl dehydrogenase E.VISGLNHSFDPLVIPVAAGNKK.E.N  | VISGLNHSFDPLVIPVA     | 470 | 349 | 2.094 | 0.006 |
| triQ2A599IQ2A599_FRATH Pyruvate dehydrogenase, K.VKTQGSAPVAGNKK.E                | VKTQGSAPV             | 531 | 188 | 2.431 | 0.000 |
| triQ2A599IQ2A599_FRATH Pyruvate dehydrogenase, K.QQAATPAAPTAGNKK.K               | QQAATPAAPT            | 531 | 214 | 2.151 | 0.001 |
| triQ2A599IQ2A599_FRATH Pyruvate dehydrogenase, K.QQAATPAAPTPAAGNKK.K             | QQAATPAAPTPA          | 531 | 216 | 3.068 | 0.000 |
| triQ2A599IQ2A599_FRATH Pyruvate dehydrogenase, K.QQAATPAAPTPASAGNKK.K            | QQAATPAAPTPAS         | 531 | 217 | 3.633 | 0.000 |
| triQ2A599IQ2A599_FRATH Pyruvate dehydrogenase, K.QQAATPAAPTPASSAGNKK.K           | QQAATPAAPTPASS        | 531 | 218 | 4.013 | 0.000 |
| triQ2A599IQ2A599_FRATH Pyruvate dehydrogenase, K.QQAATPAAPTPASSAGNKK.E           | QQAATPAAPTPASS        | 531 | 218 | 3.504 | 0.002 |



**Table S2.** Junction peptides identified by MudPIT-LC-MS-MS analysis of *F. tularensis* tmRNA- tagged proteins.

|                                                                                |                      |     |     |       |       |
|--------------------------------------------------------------------------------|----------------------|-----|-----|-------|-------|
| triQ2A599IQ2A599_FRATH Pyruvate dehydrogenase, K.QQAATPAAPTASSAGNK.K           | QQAATPAAPTASSS       | 531 | 219 | 3.683 | 0.000 |
| triQ2A599IQ2A599_FRATH Pyruvate dehydrogenase, K.QQAATPAAPTASSSVNAGNK.K        | QQAATPAAPTASSSVN     | 531 | 221 | 3.835 | 0.000 |
| triQ2A599IQ2A599_FRATH Pyruvate dehydrogenase, E.YAVDNSNAHASPAGNKKE.N          | YAVDNSNAHASP         | 531 | 234 | 4.387 | 0.000 |
| triQ2A599IQ2A599_FRATH Pyruvate dehydrogenase, E.YAVDNSNAHASPAGNKKE.E          | YAVDNSNAHASPA        | 531 | 235 | 4.369 | 0.000 |
| triQ2A599IQ2A599_FRATH Pyruvate dehydrogenase, E.YAVDNSNAHASPAGNK.K            | YAVDNSNAHASPA        | 531 | 235 | 4.312 | 0.000 |
| triQ2A599IQ2A599_FRATH Pyruvate dehydrogenase, E.YAVDNSNAHASPAGNKKE.N          | YAVDNSNAHASPA        | 531 | 235 | 3.066 | 0.000 |
| triQ2A599IQ2A599_FRATH Pyruvate dehydrogenase, E.YAVDNSNAHASPAGNKKE.N          | YAVDNSNAHASPAV       | 531 | 236 | 3.099 | 0.000 |
| triQ2A599IQ2A599_FRATH Pyruvate dehydrogenase, E.YAVDNSNAHASPAGNKKE.N          | YAVDNSNAHASPAVR      | 531 | 237 | 2.818 | 0.000 |
| triQ2A599IQ2A599_FRATH Pyruvate dehydrogenase, K.HAVTQVQAGNKKE.E               | HAVTQVQ              | 531 | 276 | 3.935 | 0.001 |
| triQ2A599IQ2A599_FRATH Pyruvate dehydrogenase, K.HAVTQVQAGNK.K                 | HAVTQVQ              | 531 | 276 | 3.903 | 0.001 |
| triQ2A599IQ2A599_FRATH Pyruvate dehydrogenase, K.VAASGSGLDLGNKKE.E             | VAASGSGLDL           | 531 | 289 | 4.355 | 0.000 |
| triQ2A599IQ2A599_FRATH Pyruvate dehydrogenase, R.YC+57QLSDAGNKKE.E             | YCQLSD               | 531 | 525 | 3.825 | 0.000 |
| triQ2A5A0IQ2A5A0_FRATH Pyruvate dehydrogenase, R.WNSTVIVAAAGNKKE.E             | WNSTVIVAA            | 893 | 96  | 3.97  | 0.000 |
| triQ2A5D8IQ2A5D8_FRATH NAD(P)-specific glutamat R.VPWVDKDGNIAGNKKE.E           | VPWVDKDGNI           | 449 | 74  | 3.903 | 0.005 |
| triQ2A5D8IQ2A5D8_FRATH NAD(P)-specific glutamat R.HIGPDIDVPAGDIGVAGNK.K        | HIGPDIDVPAGDIGVG     | 449 | 172 | 3.287 | 0.000 |
| triQ2A5D8IQ2A5D8_FRATH NAD(P)-specific glutamat E.TLQGKTVVTSGYGNAGNK.K         | TLQGKTVVTSGYGN       | 449 | 243 | 2.551 | 0.000 |
| triQ2A5D8IQ2A5D8_FRATH NAD(P)-specific glutamat K.TVVTSGYGNVAWGVCAGNK.K        | TVVTSGYGNVAWGVC      | 449 | 249 | 4.09  | 0.000 |
| triQ2A5H7IQ2A5H7_FRATH Phosphatidate cytidyllyltrε R.QKIDAIAAGNKKE.N           | QKIDAIA              | 264 | 101 | 3.96  | 0.002 |
| triQ2A5J9IQ2A5J9_FRATH Pyrrolidone-carboxylate p E.KYNPDVIIAGNKKE.N            | KYNPDVII             | 222 | 84  | 4.263 | 0.001 |
| triQ2A5J9IQ2A5J9_FRATH Pyrrolidone-carboxylate p E.RVAINVDDAAGNKKE.N           | RVAINVDDA            | 222 | 107 | 4.294 | 0.001 |
| triQ2A5J9IQ2A5J9_FRATH Pyrrolidone-carboxylate p K.ISANGENAAGNKKE.E            | ISANGENA             | 222 | 129 | 3.504 | 0.000 |
| triQ2A5J9IQ2A5J9_FRATH Pyrrolidone-carboxylate p K.ISANGENAYFAGNKKE.E          | ISANGENAYF           | 222 | 131 | 3.177 | 0.000 |
| triQ2A5J9IQ2A5J9_FRATH Pyrrolidone-carboxylate p E.NAYFSKLAGNKKE.N             | NAYFSKL              | 222 | 134 | 4.155 | 0.000 |
| triQ2A5J9IQ2A5J9_FRATH Pyrrolidone-carboxylate p K.IQAAIQAQGIAGNKKE.E          | IQAAIQAQGI           | 222 | 148 | 4.212 | 0.000 |
| triQ2A5J9IQ2A5J9_FRATH Pyrrolidone-carboxylate p K.IQAAIQAQGIPAAGNK.K          | IQAAIQAQGIPA         | 222 | 150 | 4.349 | 0.000 |
| triQ2A5J9IQ2A5J9_FRATH Pyrrolidone-carboxylate p K.IQAAIQAQGIPAYAGNK.K         | IQAAIQAQGIPAY        | 222 | 151 | 4.439 | 0.000 |
| triQ2A5J9IQ2A5J9_FRATH Pyrrolidone-carboxylate p K.IQAAIQAQGIPAYIAGNK.K        | IQAAIQAQGIPAYI       | 222 | 152 | 4.289 | 0.000 |
| triQ2A5J9IQ2A5J9_FRATH Pyrrolidone-carboxylate p K.IQAAIQAQGIPAYIAGNKKE.E      | IQAAIQAQGIPAYI       | 222 | 152 | 2.304 | 0.005 |
| triQ2A5J9IQ2A5J9_FRATH Pyrrolidone-carboxylate p K.IQAAIQAQGIPAYISAGNK.K       | IQAAIQAQGIPAYIS      | 222 | 153 | 4.382 | 0.000 |
| triQ2A5J9IQ2A5J9_FRATH Pyrrolidone-carboxylate p K.IQAAIQAQGIPAYISAGNKKE.E     | IQAAIQAQGIPAYIS      | 222 | 153 | 3.045 | 0.001 |
| triQ2A5J9IQ2A5J9_FRATH Pyrrolidone-carboxylate p K.IQAAIQAQGIPAYISDAGNKKE.E    | IQAAIQAQGIPAYISD     | 222 | 154 | 3.047 | 0.000 |
| triQ2A5J9IQ2A5J9_FRATH Pyrrolidone-carboxylate p K.IQAAIQAQGIPAYISDSAGNKKE.E   | IQAAIQAQGIPAYISDS    | 222 | 155 | 3.458 | 0.000 |
| triQ2A5J9IQ2A5J9_FRATH Pyrrolidone-carboxylate p K.IQAAIQAQGIPAYISDSAGTGNKKE.E | IQAAIQAQGIPAYISDSAGT | 222 | 158 | 3.367 | 0.000 |

**Table S2.** Junction peptides identified by MudPIT-LC-MS-MS analysis of *F. tularensis* tmRNA- tagged proteins.

|                        |                            |                                 |                        |     |     |       |       |
|------------------------|----------------------------|---------------------------------|------------------------|-----|-----|-------|-------|
| triQ2A5J9IQ2A5J9_FRATH | Pyrrolidone-carboxylate p  | K.IQAAIQAQGIPAYISDSAGTYVAGNKK.E | IQAAIQAQGIPAYISDSAGTYV | 222 | 160 | 2.364 | 0.000 |
| triQ2A5L5IQ2A5L5_FRATH | Cytochrome O ubiquinol c   | R.PTWSHSNKLEIICWAGNKK.E         | PTWSHSNKLEIICW         | 300 | 89  | 2.412 | 0.005 |
| triQ2A5L7IQ2A5L7_FRATH | Cytochrome d terminal o    | R.QPWTVYDQLPTSIAGNKK.E.N        | QPWTVYDQLPTSI          | 584 | 527 | 2.024 | 0.001 |
| triQ2A5M6IQ2A5M6_FRATH | Acyltransferase FTL_018    | K.FSPKNWGIWIVVAGNKK.E           | FSPKNWGIWIVV           | 307 | 17  | 3.123 | 0.008 |
| triQ2A5N2IQ2A5N2_FRATH | Putative uncharacterized   | K.QHQQLVGSDPAGNKK.E             | QHQQLVGSDP             | 152 | 93  | 2.695 | 0.001 |
| triQ2A5N2IQ2A5N2_FRATH | Putative uncharacterized   | K.QHQQLVGSDPSAGNKK.E            | QHQQLVGSDPS            | 152 | 94  | 2.553 | 0.000 |
| triQ2A5N2IQ2A5N2_FRATH | Putative uncharacterized   | K.QHQQLVGSDPSTWTPAGNKK.E        | QHQQLVGSDPSTWTP        | 152 | 98  | 2.41  | 0.002 |
| triQ2A5N2IQ2A5N2_FRATH | Putative uncharacterized   | E.NYRGWQGYC+57FPAEQAGNKK.E.N    | NYRGWQGYCFPAEQ         | 152 | 127 | 3.09  | 0.000 |
| triQ2A5V5IQ2A5V5_FRATH | Putative uncharacterized   | K.NKVPVHLAGNKK.E                | NKVPVHL                | 117 | 19  | 2.644 | 0.008 |
| triQ2A5V6IQ2A5V6_FRATH | ClpB protein FTL_0094      | R.YELHHGVAGNKK.E                | YELHHGV                | 859 | 363 | 3.802 | 0.000 |
| triQ2A5V6IQ2A5V6_FRATH | ClpB protein FTL_0094      | E.YKGLEELWKAAGNKK.E.N           | YKGLEELWKA             | 859 | 464 | 2.224 | 0.008 |
| triQ2A5V6IQ2A5V6_FRATH | ClpB protein FTL_0094      | E.LQYGKIPAGNKK.E.N              | LQYGKIP                | 859 | 507 | 3.292 | 0.006 |
| triQ2A5V6IQ2A5V6_FRATH | ClpB protein FTL_0094      | E.IADVVS KATAGNKK.E.N           | IADVVS KAT             | 859 | 546 | 3.639 | 0.000 |
| triQ2A5V6IQ2A5V6_FRATH | ClpB protein FTL_0094      | E.IADVVS KATGAGNKK.E.N          | IADVVS KATG            | 859 | 547 | 4.079 | 0.000 |
| triQ2A5V6IQ2A5V6_FRATH | ClpB protein FTL_0094      | R.SGLSDPNR PAGNKK.E             | SGLSDPNRP              | 859 | 599 | 3.677 | 0.000 |
| triQ2A5V6IQ2A5V6_FRATH | ClpB protein FTL_0094      | R.SGLSDPNRPIAGNKK.E             | SGLSDPNRPI             | 859 | 600 | 4.209 | 0.000 |
| triQ2A5V6IQ2A5V6_FRATH | ClpB protein FTL_0094      | R.SGLSDPNRPIGAGNKK.E            | SGLSDPNRPIG            | 859 | 601 | 4.478 | 0.000 |
| triQ2A5V6IQ2A5V6_FRATH | ClpB protein FTL_0094      | R.SGLSDPNRPIGAGNKK.E            | SGLSDPNRPIG            | 859 | 601 | 2.011 | 0.001 |
| triQ2A5V6IQ2A5V6_FRATH | ClpB protein FTL_0094      | R.SGLSDPNRPIGSAGNKK.E           | SGLSDPNRPIGS           | 859 | 602 | 4.236 | 0.000 |
| triQ2A5V6IQ2A5V6_FRATH | ClpB protein FTL_0094      | K.AHADIFNILLQVLDAGNKK.E         | AHADIFNILLQVLD         | 859 | 698 | 2.287 | 0.005 |
| triQ2A5V6IQ2A5V6_FRATH | ClpB protein FTL_0094      | E.FVNRVDDAIVFEAGNKK.E           | FVNRVDDAIVFE           | 859 | 765 | 3.114 | 0.003 |
| triQ2A5V7IQ2A5V7_FRATH | Chitinase FTL_0093         | K.AKPAPVPAGNKK.E                | AKPAPVP                | 730 | 173 | 3.41  | 0.001 |
| triQ2A5V7IQ2A5V7_FRATH | Chitinase FTL_0093         | K.TTGLPQTIAGNKK.E               | TTGLPQTI               | 730 | 251 | 3.625 | 0.000 |
| triQ2A5V7IQ2A5V7_FRATH | Chitinase FTL_0093         | E.LYTINPNNPEPAGNKK.E            | LYTINPNNPEP            | 730 | 272 | 3.28  | 0.000 |
| triQ2A5V7IQ2A5V7_FRATH | Chitinase FTL_0093         | E.LYTINPNNPEPITLGAGNKK.E        | LYTINPNNPEPITLG        | 730 | 276 | 4.296 | 0.000 |
| triQ2A5V7IQ2A5V7_FRATH | Chitinase FTL_0093         | K.KVLSSDASAGNKK.E               | KVLSSDAS               | 730 | 293 | 3.657 | 0.002 |
| triQ2A5V7IQ2A5V7_FRATH | Chitinase FTL_0093         | E.IYVAKNIAGNKK.E.N              | IYVAKNI                | 730 | 301 | 4.015 | 0.003 |
| triQ2A5V7IQ2A5V7_FRATH | Chitinase FTL_0093         | K.NIMPNPIAGNKK.E                | NIMPNPI                | 730 | 306 | 3.229 | 0.000 |
| triQ2A5V7IQ2A5V7_FRATH | Chitinase FTL_0093         | K.NIMPNPIIAGNKK.E               | NIMPNPII               | 730 | 307 | 3.976 | 0.000 |
| triQ2A612IQ2A612_FRATH | Acid phosphatase FTL_00( * | APFANIENAAGNKK.E                | APFANIENA              | 351 | 44  | 2.677 | 0.005 |
| triQ2A627IQ2A627_FRATH | Single-stranded DNA-bind   | E.INSSNFDAGNKK.E.N              | INSSNFD                | 158 | 153 | 3.955 | 0.000 |
| triQ2A632IQ2A632_FRATH | Outer membrane protein     | E.TSPLGKAKVTAGNKK.E             | TSPLGKAKVT             | 179 | 46  | 2.445 | 0.002 |
| triQ2A632IQ2A632_FRATH | Outer membrane protein     | K.LKPQMDAGNKK.E                 | LKPQMD                 | 179 | 57  | 4.253 | 0.004 |

**Table S2.** Junction peptides identified by MudPIT-LC-MS-MS analysis of *F. tularensis* tmRNA- tagged proteins.

|                                                                                  |                         |     |     |       |       |
|----------------------------------------------------------------------------------|-------------------------|-----|-----|-------|-------|
| triQ2A632IQ2A632_FRATH Outer membrane protein   K.LKPQMDAGNK.K                   | LKPQMD                  | 179 | 57  | 3.502 | 0.009 |
| triQ2A632IQ2A632_FRATH Outer membrane protein   K.LKPQM+16DQAGNKK.E              | LKPQMDQ                 | 179 | 58  | 2.494 | 0.004 |
| triQ2A632IQ2A632_FRATH Outer membrane protein   K.LKPQMDQLKAGNK.K                | LKPQMDQLK               | 179 | 60  | 3.992 | 0.000 |
| triQ2A632IQ2A632_FRATH Outer membrane protein   K.LKPQMDQLKQNITAAGNKK.E          | LKPQMDQLKQNITA          | 179 | 65  | 3.046 | 0.003 |
| triQ2A632IQ2A632_FRATH Outer membrane protein   E.KDDVQAGNKK.E                   | KDDVQ                   | 179 | 81  | 3.483 | 0.001 |
| triQ2A632IQ2A632_FRATH Outer membrane protein   K.VNVYTQEKDDVQAGNKK.E            | VNVYTQEKDDVQ            | 179 | 81  | 2.622 | 0.008 |
| triQ2A632IQ2A632_FRATH Outer membrane protein   E.KNVVYTQEKDDVQTAGNKK.E          | KNVVYTQEKDDVQT          | 179 | 82  | 3.377 | 0.000 |
| triQ2A632IQ2A632_FRATH Outer membrane protein   K.VNVYTQEKDDVQTAGNKK.E           | VNVYTQEKDDVQT           | 179 | 82  | 4.145 | 0.000 |
| triQ2A632IQ2A632_FRATH Outer membrane protein   K.DAQSADKVAGNKK.E                | DAQSADKV                | 179 | 98  | 3.726 | 0.001 |
| triQ2A632IQ2A632_FRATH Outer membrane protein   K.DAQSADKVEAGNKK.E               | DAQSADKVE               | 179 | 99  | 3.92  | 0.001 |
| triQ2A632IQ2A632_FRATH Outer membrane protein   E.KDDVQTDDSKGDTKDAQSADKVEAGNKK.E | KDDVQTDDSKGDTKDAQSADKVE | 179 | 99  | 2.645 | 0.000 |
| triQ2A632IQ2A632_FRATH Outer membrane protein   K.DAQSADKVENQAGNKK.E             | DAQSADKVENQ             | 179 | 101 | 3.631 | 0.003 |
| triQ2A632IQ2A632_FRATH Outer membrane protein   K.DAQSADKVENQDKQQAAGNKK.E        | DAQSADKVENQDKQQA        | 179 | 108 | 2.889 | 0.001 |
| triQ2A632IQ2A632_FRATH Outer membrane protein   E.NQDKQQAQADLEKAGNK.K            | NQDKQQAQADLEK           | 179 | 112 | 3.353 | 0.001 |
| triQ2A632IQ2A632_FRATH Outer membrane protein   K.AM+16KDYQAGNKK.E               | AMKDYQ                  | 179 | 118 | 2.669 | 0.000 |
| triQ2A632IQ2A632_FRATH Outer membrane protein   E.KAMKDYQAGNKK.E                 | KAMKDYQ                 | 179 | 118 | 3.592 | 0.001 |
| triQ2A632IQ2A632_FRATH Outer membrane protein   E.KAMKDYQAGNKK.E                 | KAMKDYQ                 | 179 | 118 | 3.458 | 0.004 |
| triQ2A632IQ2A632_FRATH Outer membrane protein   K.AMKDYQNAGNKK.E                 | AMKDYQN                 | 179 | 119 | 4.112 | 0.002 |
| triQ2A632IQ2A632_FRATH Outer membrane protein   K.AM+16KDYQNAGNKK.E              | AMKDYQN                 | 179 | 119 | 2.264 | 0.008 |
| triQ2A632IQ2A632_FRATH Outer membrane protein   E.KAMKDYQNAGNKK.E                | KAMKDYQN                | 179 | 119 | 3.594 | 0.003 |
| triQ2A632IQ2A632_FRATH Outer membrane protein   K.AMKDYQNLAGNKK.E                | AMKDYQNL                | 179 | 120 | 4.126 | 0.003 |
| triQ2A632IQ2A632_FRATH Outer membrane protein   K.AM+16KDYQNLAGNKK.E             | AMKDYQNL                | 179 | 120 | 3.035 | 0.003 |
| triQ2A632IQ2A632_FRATH Outer membrane protein   E.KAMKDYQNLAGNKK.E               | KAMKDYQNL               | 179 | 120 | 4.177 | 0.001 |
| triQ2A632IQ2A632_FRATH Outer membrane protein   E.KAMKDYQNLAGNKK.E               | KAMKDYQNL               | 179 | 120 | 4.022 | 0.000 |
| triQ2A632IQ2A632_FRATH Outer membrane protein   E.KAMKDYQNLAGNK.K                | KAMKDYQNL               | 179 | 120 | 3.9   | 0.000 |
| triQ2A632IQ2A632_FRATH Outer membrane protein   E.KAM+16KDYQNLAGNKK.E            | KAMKDYQNL               | 179 | 120 | 2.805 | 0.000 |
| triQ2A632IQ2A632_FRATH Outer membrane protein   K.AMKDYQNL MAGNKK.E              | AMKDYQNL M              | 179 | 121 | 4.305 | 0.000 |
| triQ2A632IQ2A632_FRATH Outer membrane protein   K.AMKDYQNL M+16AGNKK.E           | AMKDYQNL M              | 179 | 121 | 3.433 | 0.000 |
| triQ2A632IQ2A632_FRATH Outer membrane protein   K.AM+16KDYQNL MAGNKK.E           | AMKDYQNL M              | 179 | 121 | 3.209 | 0.002 |
| triQ2A632IQ2A632_FRATH Outer membrane protein   E.KAMKDYQNL MAGNKK.E             | KAMKDYQNL M             | 179 | 121 | 4.086 | 0.000 |
| triQ2A632IQ2A632_FRATH Outer membrane protein   E.KAMKDYQNL MAGNKK.E             | KAMKDYQNL M             | 179 | 121 | 3.985 | 0.000 |
| triQ2A632IQ2A632_FRATH Outer membrane protein   E.KAMKDYQNL M+16AGNKK.E          | KAMKDYQNL M             | 179 | 121 | 3.185 | 0.000 |
| triQ2A632IQ2A632_FRATH Outer membrane protein   E.KAMKDYQNL M NAGNKK.E           | KAMKDYQNL M N           | 179 | 122 | 4.019 | 0.002 |

**Table S2.** Junction peptides identified by MudPIT-LC-MS-MS analysis of *F. tularensis* tmRNA- tagged proteins.

|                                                                             |                  |     |     |       |       |
|-----------------------------------------------------------------------------|------------------|-----|-----|-------|-------|
| triQ2A632IQ2A632_FRATH Outer membrane protein   K.AMKDYQNLNMNQAGNKK.E       | AMKDYQNLNMNQ     | 179 | 123 | 4.151 | 0.002 |
| triQ2A632IQ2A632_FRATH Outer membrane protein   K.MASDDADAGNKKENR.V         | MASDDAD          | 179 | 133 | 4.393 | 0.003 |
| triQ2A632IQ2A632_FRATH Outer membrane protein   K.MASDDADAGNKK.E            | MASDDAD          | 179 | 133 | 3.899 | 0.000 |
| triQ2A632IQ2A632_FRATH Outer membrane protein   K.MASDDADAAGNKK.E           | MASDDADA         | 179 | 134 | 4.124 | 0.000 |
| triQ2A632IQ2A632_FRATH Outer membrane protein   K.MASDDADAFKAGNK.K          | MASDDADAFK       | 179 | 136 | 4.313 | 0.000 |
| triQ2A632IQ2A632_FRATH Outer membrane protein   K.MASDDADAFKDAAGNKK.E       | MASDDADAFKDA     | 179 | 138 | 4.179 | 0.000 |
| triQ2A632IQ2A632_FRATH Outer membrane protein   K.MASDDADAFKDAAGNKKENR.V    | MASDDADAFKDA     | 179 | 138 | 3.357 | 0.000 |
| triQ2A632IQ2A632_FRATH Outer membrane protein   D.ALIKASAAGNKK.E.N          | ALIKASA          | 179 | 144 | 3.769 | 0.001 |
| triQ2A632IQ2A632_FRATH Outer membrane protein   D.ALIKASAQAGNKK.E.N         | ALIKASAQ         | 179 | 145 | 3.95  | 0.000 |
| triQ2A632IQ2A632_FRATH Outer membrane protein   K.ASAQVAKAGNK.K             | ASQVAK           | 179 | 148 | 3.406 | 0.000 |
| triQ2A632IQ2A632_FRATH Outer membrane protein   K.EKQLDAIAGNKK.E            | EKQLDAI          | 179 | 155 | 3.565 | 0.004 |
| triQ2A632IQ2A632_FRATH Outer membrane protein   E.KQLDAIAGNKK.E.N           | KQLDAI           | 179 | 155 | 3.944 | 0.005 |
| triQ2A632IQ2A632_FRATH Outer membrane protein   E.KQLDAIAGNKK.E             | KQLDAI           | 179 | 155 | 3.799 | 0.000 |
| triQ2A632IQ2A632_FRATH Outer membrane protein   *.EKQLDAILPAGNKK.E          | EKQLDAILP        | 179 | 157 | 3.701 | 0.000 |
| triQ2A632IQ2A632_FRATH Outer membrane protein   E.KQLDAILPAGNKK.E           | KQLDAILP         | 179 | 157 | 4.093 | 0.000 |
| triQ2A632IQ2A632_FRATH Outer membrane protein   E.KQLDAILPAGNKK.E.N         | KQLDAILP         | 179 | 157 | 4.015 | 0.000 |
| triQ2A632IQ2A632_FRATH Outer membrane protein   K.QLDAILPAGNKK.E            | QLDAILP          | 179 | 157 | 2.011 | 0.006 |
| triQ2A632IQ2A632_FRATH Outer membrane protein   D.AILPAAGNKK.E.N            | AILPA            | 179 | 158 | 3.644 | 0.005 |
| triQ2A632IQ2A632_FRATH Outer membrane protein   E.KQLDAILPAAGNK.K           | KQLDAILPA        | 179 | 158 | 4.047 | 0.000 |
| triQ2A632IQ2A632_FRATH Outer membrane protein   E.KQLDAILPAEAGNKK.E.N       | KQLDAILPAE       | 179 | 159 | 4.203 | 0.000 |
| triQ2A632IQ2A632_FRATH Outer membrane protein   *.EKQLDAILPAEMAGNKK.E       | EKQLDAILPAEM     | 179 | 160 | 4.069 | 0.000 |
| triQ2A632IQ2A632_FRATH Outer membrane protein   E.KQLDAILPAEMAGNKK.E.N      | KQLDAILPAEM      | 179 | 160 | 4.295 | 0.000 |
| triQ2A632IQ2A632_FRATH Outer membrane protein   *.EKQLDAILPAEMSAGNKK.E      | EKQLDAILPAEMS    | 179 | 161 | 3.25  | 0.000 |
| triQ2A632IQ2A632_FRATH Outer membrane protein   E.KQLDAILPAEMSAGNKK.E.N     | KQLDAILPAEMS     | 179 | 161 | 4.239 | 0.009 |
| triQ2A632IQ2A632_FRATH Outer membrane protein   *.EKQLDAILPAEMSLAGNKK.E     | EKQLDAILPAEMSL   | 179 | 162 | 4.185 | 0.000 |
| triQ2A632IQ2A632_FRATH Outer membrane protein   E.KQLDAILPAEMSLAGNKK.E.N    | KQLDAILPAEMSL    | 179 | 162 | 4.243 | 0.001 |
| triQ2A632IQ2A632_FRATH Outer membrane protein   E.KQLDAILPAEM+16SLAGNKK.E.N | KQLDAILPAEMSL    | 179 | 162 | 3.807 | 0.000 |
| triQ2A632IQ2A632_FRATH Outer membrane protein   K.QLDAILPAEMSLAGNKK.E       | QLDAILPAEMSL     | 179 | 162 | 4.071 | 0.000 |
| triQ2A632IQ2A632_FRATH Outer membrane protein   K.QLDAILPAEMSLAGNK.K        | QLDAILPAEMSL     | 179 | 162 | 3.506 | 0.000 |
| triQ2A632IQ2A632_FRATH Outer membrane protein   E.KQLDAILPAEMSLYNVAGNKK.E.N | KQLDAILPAEMSLYNV | 179 | 165 | 3.353 | 0.000 |
| triQ2A632IQ2A632_FRATH Outer membrane protein   E.MSLYNVAGNKK.E.N           | MSLYNV           | 179 | 165 | 4.04  | 0.001 |
| triQ2A632IQ2A632_FRATH Outer membrane protein   E.M+16SLYNVAGNKK.E.N        | MSLYNV           | 179 | 165 | 3.314 | 0.003 |
| triQ2A632IQ2A632_FRATH Outer membrane protein   E.MSLYNVAGNK.K              | MSLYNV           | 179 | 165 | 3.152 | 0.004 |

**Table S2.** Junction peptides identified by MudPIT-LC-MS-MS analysis of *F. tularensis* tmRNA- tagged proteins.

|                                                                                       |                             |     |     |       |       |
|---------------------------------------------------------------------------------------|-----------------------------|-----|-----|-------|-------|
| triQ2A632IQ2A632_FRATH Outer membrane protein   K.QLDAILPAEMSLYNVAGNKKE.E             | QLDAILPAEMSLYNV             | 179 | 165 | 3.256 | 0.004 |
| triQ2A632IQ2A632_FRATH Outer membrane protein   E.MSLYNVDAGNKKE.N                     | MSLYNVD                     | 179 | 166 | 4.096 | 0.000 |
| triQ2A632IQ2A632_FRATH Outer membrane protein   E.KQLDAILPAEMSLYNVDSIAGNKKE.N         | KQLDAILPAEMSLYNVDSI         | 179 | 168 | 3.637 | 0.000 |
| triQ2A632IQ2A632_FRATH Outer membrane protein   E.MSLYNVDSIAGNKKE.N                   | MSLYNVDSI                   | 179 | 168 | 4.228 | 0.000 |
| triQ2A632IQ2A632_FRATH Outer membrane protein   E.MSLYNVDSIAGNKKE.E                   | MSLYNVDSI                   | 179 | 168 | 3.482 | 0.000 |
| triQ2A632IQ2A632_FRATH Outer membrane protein   K.QLDAILPAEMSLYNVDSIAGNKKE.E          | QLDAILPAEMSLYNVDSI          | 179 | 168 | 4.271 | 0.000 |
| triQ2A632IQ2A632_FRATH Outer membrane protein   E.KQLDAILPAEMSLYNVDSIDVTKDVIAAGNKKE.N | KQLDAILPAEMSLYNVDSIDVTKDVIA | 179 | 176 | 3.179 | 0.001 |
| triQ2A632IQ2A632_FRATH Outer membrane protein   E.MSLYNVDSIDVTKDVIAKAGNKKE.N          | MSLYNVDSIDVTKDVIAK          | 179 | 177 | 3.271 | 0.000 |
| triQ2A632IQ2A632_FRATH Outer membrane protein   E.MSLYNVDSIDVTKDVIAKMQAGNKKE.N        | MSLYNVDSIDVTKDVIAKMQ        | 179 | 179 | 3.077 | 0.000 |
| triQ2A639IQ2A639_FRATH DNA polymerase III, beta   R.LNISQNQLLSANNPDAAGNK.K            | LNISQNQLLSANNPDA            | 367 | 300 | 4.385 | 0.009 |

**Table S3.** List of oligonucleotide primers used in this study.

| Primer Name        | Primer Sequence                                                                         |
|--------------------|-----------------------------------------------------------------------------------------|
| ssrA-UPfw-Mlul     | 5'-CCACGCGTCGGTATTATTGCACTATCATCGGC-3'                                                  |
| ssrA-DNrev-Mlul    | 5'-CCACGCGTGATTATTATTCAAAGTTTTTGGTGGAGGCGG-3'                                           |
| smpB-UPfw-Mlul     | 5'-GGA CGC GTC AAG CTC GTA CAT CTG TGC GG-3'                                            |
| smpB-DNfw-Mlul     | 5'-CCACGCGTGGTCTTTGTCATTTATTATAAGCC-3'                                                  |
| smpB-UP200-EcoRI   | 5'-GGAATTCCAATGTCATAACACATCGGTAG-3'                                                     |
| smpB-DN200-BamHI   | 5'-GGGATCCGAGACTGATCTAGTGTATATACATG-3'                                                  |
| EBS-Universal      | 5'-CGAAATTAGAACTTGCGTTTCAGTAAAC-3'                                                      |
| ssrA147-IBS        | 5'AAAACGAGATAATTATCCTTAAGCAACTTTGCTGTGCGCCAGATAGGG TG-3'                                |
| ssrA147s-EBS1d     | 5'- CAG ATT GTA CAA ATG TGG TGA TAA CAG ATA AGT CTT TGC TGC TAA CTT ACC TTT CTT TGT -3' |
| ssrA147s-EBS2      | 5'- TGA ACG CAA GTT TCT AAT TTC GAT TTT GCT TCG ATA GAG GAA AGT GTC T -3'               |
| ssrA174-IBS        | 5'-AAAACGAGATAATTATCCTTAGCCTACTCTAGCGTGCGCCAGATAGGGTG-3'                                |
| ssrA174s-EBS1d     | 5'- CAG ATT GTA CAA ATG TGG TGA TAA CAG ATA AGT CTC TAG CTT TAA CTT ACC TTT CTT TGT -3' |
| ssrA174s-EBS2      | 5'- TGA ACG CAA GTT TCT AAT TTC GAT TTA GGC TCG ATA GAG GAA AGT GTC T -3'               |
| smpB255-IBS        | 5'-AAAACGAGATAATTATCCTTAGCAGCCACACGCGTGCGCCAGATAGGGTG-3'                                |
| SmpB255-EBS1       | 5'- CAG ATT GTA CAA ATG TGG TGA TAA CAG ATA AGT CAC ACG CAA TAA CTT ACC TTT CTT TGT -3' |
| smpB255-EBS2       | 5'- TGA ACG CAA GTT TCT AAT TTC GAT TGC TGC TCG ATA GAG GAA AGT GTC T -3'               |
| ssrA-DDmut-S       | 5'- TTGCTGCTGTTGCTAAAGATGACTAGTCTAGCTTAATAAC-3'                                         |
| ssrA-DDmut-AS      | 5'- GTTATTAAGCTAGACTAGTCATCTTTAGCAACAGCAGCAA-3'                                         |
| ssrA-His6-MutF     | 5'- CGACAGCAACTTTGCTCATCATCATCACCATCACTAGTCTAGCTTAATAAC-3'                              |
| ssrA-His6-MutR     | 5'-GTTATTAAGCTAGACTAGTGATGGTGATGATGATGAGCAAAGTTGCTGTCG-3'                               |
| ssrA-His6stem-MutF | 5'-CATCATCACCATCACTAGTCGATGGTAATATGCTATATGCGCACGGATATGATAG-3'                           |
| ssrA-His6stem-MutR | 5'- CTATCATATCCGTGCGCATATAGCATATTACCATCGACTAGTGATGGTGATGATG-3'                          |
| ssrA-Ala5Glu-mutF  | 5'-CTGGCAACAAAAAGAAAACCGCGTAGCGGC-3'                                                    |
| ssrA-Ala5Glu-mutR  | 5'- GCCGCTACGCGTTTTCTTTTTGTTGCCAG-3'                                                    |
